# Supplementary material for: Bacteriohopanetetrol-x: constraining its application as a lipid biomarker for marine anammox using the water column oxygen gradient of the Benguela upwelling system
Source: Copernicus journal article supplement (doi:10.5194/bg-2021-257), 2021-10-05
Supplement: Supplementary file 1 [file Table_S1.xlsx]

## Sheet: Sheet1
Station manuscript ID	Cruise/Station/cast	yyyy-mm-ddThh:mm:ss.sss	Longitude [degrees_east]	Latitude [degrees_north]	Temperature [ITS-90, deg C]	Potential Temperature [ITS-90, deg C]	Conductivity [mS/cm]	Pressure, Digiquartz [db]	Depth [salt water, m]	Salinity, Practical [PSU]	Density [sigma-theta, Kg/m^3]	Time, Elapsed [seconds]	Fluorescence, Chelsea Aqua 3 Chl Con [ug/l]	Oxygen, SBE 43 [umol/Kg]	Oxygen (uM)	Beam Transmission, WET Labs C-Star [%]	Altimeter [m]	SPAR/Surface Irradiance	PAR/Irradiance, Biospherical/Licor	Density [sigma-t, Kg/m^3]
1	64PE449_S02C01	2019-02-03T06:13:42	12.8432	-24.0558	18.1179	18.1173	46.0603	4.026	3.999	35.0356	25.2703	11.069	1.7097	232.731	238.612	87.1014	45.4	524.57	46.079	25.2702
1	64PE449_S02C01	2019-02-03T06:13:42	12.8432	-24.0558	18.1243	18.1235	46.0673	5.032	4.996	35.0355	25.2688	21.396	1.6874	233.348	239.244	87.1016	54.31	534.89	37.911	25.2686
1	64PE449_S02C01	2019-02-03T06:13:42	12.8432	-24.0558	18.1229	18.1218	46.0661	6.039	6	35.0355	25.2691	22.923	1.6817	232.634	238.512	87.0692	57.03	537.97	31.95	25.2689
1	64PE449_S02C01	2019-02-03T06:13:42	12.8432	-24.0558	18.1211	18.1199	46.0648	7.045	6.998	35.0356	25.2697	24.574	1.7863	233.157	239.049	87.0555	100.22	531.46	26.768	25.2694
1	64PE449_S02C01	2019-02-03T06:13:42	12.8432	-24.0558	18.1206	18.1192	46.0646	8.051	7.997	35.0355	25.2698	26.008	1.7803	233.361	239.258	87.1213	99.93	523.65	22.859	25.2694
1	64PE449_S02C01	2019-02-03T06:13:42	12.8432	-24.0558	18.1205	18.1189	46.065	9.058	8.999	35.0355	25.2699	27.22	1.7779	233.041	238.93	87.0425	99.93	514.82	19.133	25.2694
1	64PE449_S02C01	2019-02-03T06:13:42	12.8432	-24.0558	18.1203	18.1185	46.0652	10.064	10.003	35.0355	25.2699	28.37	1.8357	232.871	238.756	87.083	99.93	510.66	16.443	25.2695
1	64PE449_S02C01	2019-02-03T06:13:42	12.8432	-24.0558	18.1218	18.1199	46.067	11.071	11.001	35.0353	25.2695	29.723	1.814	232.552	238.428	87.0513	99.93	516.69	14.019	25.2691
1	64PE449_S02C01	2019-02-03T06:13:42	12.8432	-24.0558	18.1227	18.1206	46.0686	12.077	11.998	35.0355	25.2694	31.108	1.8328	232.8	238.683	87.0402	99.93	528.41	12.034	25.2689
1	64PE449_S02C01	2019-02-03T06:13:42	12.8432	-24.0558	18.1221	18.1198	46.0685	13.084	12.999	35.0356	25.2697	32.296	1.7972	232.597	238.475	87.0451	99.93	529.1	10.443	25.2691
1	64PE449_S02C01	2019-02-03T06:13:42	12.8432	-24.0558	18.1199	18.1174	46.0667	14.09	14	35.0356	25.2703	33.402	1.8227	232.399	238.272	87.0197	99.93	524.99	9.1812	25.2697
1	64PE449_S02C01	2019-02-03T06:13:42	12.8432	-24.0558	18.1171	18.1145	46.0647	15.097	15.003	35.0359	25.2713	34.525	1.838	231.755	237.612	87.0446	99.93	524.89	8.3268	25.2705
1	64PE449_S02C01	2019-02-03T06:13:42	12.8432	-24.0558	18.1149	18.1121	46.063	16.103	15.995	35.0361	25.272	35.776	1.7826	231.664	237.518	87.0773	99.94	530.71	8.0529	25.2712
1	64PE449_S02C01	2019-02-03T06:13:42	12.8432	-24.0558	18.115	18.1121	46.0641	17.11	16.998	35.0365	25.2723	36.824	1.7606	231.537	237.388	87.0286	99.94	529	7.5268	25.2715
1	64PE449_S02C01	2019-02-03T06:13:42	12.8432	-24.0558	18.1167	18.1136	46.0668	18.116	17.999	35.0369	25.2723	37.778	1.7745	230.459	236.283	87.0678	99.93	523.57	7.3381	25.2715
1	64PE449_S02C01	2019-02-03T06:13:42	12.8432	-24.0558	18.1176	18.1142	46.0683	19.123	19	35.0371	25.2722	38.736	1.8141	230.238	236.056	87.0514	99.93	520.71	7.1475	25.2713
1	64PE449_S02C01	2019-02-03T06:13:42	12.8432	-24.0558	18.1181	18.1146	46.0699	20.129	20.004	35.0376	25.2725	39.724	1.8919	229.768	235.575	87.1461	99.93	522.07	6.5804	25.2717
1	64PE449_S02C01	2019-02-03T06:13:42	12.8432	-24.0558	18.1124	18.1088	46.0583	21.136	21.001	35.0323	25.2699	40.834	1.9156	228.38	234.151	87.1949	99.93	525.34	6.2978	25.2689
1	64PE449_S02C01	2019-02-03T06:13:42	12.8432	-24.0558	18.098	18.0942	46.0527	22.142	22	35.0398	25.2793	42.02	1.8171	226.779	232.512	87.4881	99.93	523.93	6.2089	25.278
1	64PE449_S02C01	2019-02-03T06:13:42	12.8432	-24.0558	18.0863	18.0824	46.0436	23.149	23	35.0419	25.2838	43.183	1.8496	224.457	230.132	87.6015	99.93	517.8	5.9089	25.2823
1	64PE449_S02C01	2019-02-03T06:13:42	12.8432	-24.0558	18.0768	18.0726	46.0366	24.155	23.997	35.0439	25.2878	44.295	1.891	221.827	227.436	87.7446	99.93	511.85	5.4392	25.2861
1	64PE449_S02C01	2019-02-03T06:13:42	12.8432	-24.0558	18.0494	18.0452	46.0135	25.162	24.999	35.0477	25.2974	45.308	1.8731	220.241	225.812	87.959	99.93	507.34	4.9252	25.2954
1	64PE449_S02C01	2019-02-03T06:13:42	12.8432	-24.0558	18.0052	18.0007	45.9734	26.168	26.001	35.052	25.3118	46.241	1.8664	219.82	225.383	88.0561	99.93	505.86	4.3974	25.3089
1	64PE449_S02C01	2019-02-03T06:13:42	12.8432	-24.0558	17.9128	17.9081	45.8832	27.175	27.003	35.0558	25.3374	47.211	1.9398	219.547	225.109	88.2446	99.93	516.7	3.9507	25.3331
1	64PE449_S02C01	2019-02-03T06:13:42	12.8432	-24.0558	17.7885	17.7837	45.7569	28.181	28.002	35.0563	25.3683	48.338	1.9317	218.336	223.874	88.4733	99.93	539.02	3.6208	25.3623
1	64PE449_S02C01	2019-02-03T06:13:42	12.8432	-24.0558	17.7169	17.7119	45.6825	29.188	28.997	35.0544	25.3844	49.595	1.9774	218.03	223.563	88.8166	99.92	553.3	3.3413	25.3778
1	64PE449_S02C01	2019-02-03T06:13:42	12.8432	-24.0558	17.6836	17.6785	45.6495	30.194	29.999	35.054	25.3923	50.692	1.9537	219.105	224.667	89.2302	99.92	543.5	2.9874	25.3858
1	64PE449_S02C01	2019-02-03T06:13:42	12.8432	-24.0558	17.6448	17.6395	45.61	31.201	30.996	35.0532	25.4012	51.673	1.913	219.703	225.282	89.4548	99.92	525.85	2.6694	25.3946
1	64PE449_S02C01	2019-02-03T06:13:42	12.8432	-24.0558	17.594	17.5886	45.559	32.207	32.002	35.0531	25.4135	52.571	1.8482	219.848	225.434	89.4923	99.92	514.93	2.3939	25.4067
1	64PE449_S02C01	2019-02-03T06:13:42	12.8432	-24.0558	17.5543	17.5487	45.5175	33.214	33.001	35.0514	25.4218	53.462	1.8709	219.262	224.834	89.4648	99.92	512.52	2.1375	25.4148
1	64PE449_S02C01	2019-02-03T06:13:42	12.8432	-24.0558	17.5325	17.5265	45.4954	34.221	34.003	35.0505	25.4265	54.443	1.8584	216.977	222.493	89.2849	99.92	518.96	1.9199	25.4197
1	64PE449_S02C01	2019-02-03T06:13:42	12.8432	-24.0558	17.4415	17.4357	45.4066	35.227	35.001	35.053	25.4504	55.541	1.8432	216.005	221.501	89.0596	99.93	524.71	1.7157	25.4429
1	64PE449_S02C01	2019-02-03T06:13:42	12.8432	-24.0558	17.362	17.3559	45.3269	36.234	36.002	35.0532	25.4699	56.726	1.8945	212.848	218.268	88.8184	99.92	528.67	1.4739	25.4618
1	64PE449_S02C01	2019-02-03T06:13:42	12.8432	-24.0558	17.2655	17.2593	45.2332	37.24	36.996	35.056	25.4953	58.008	1.9274	199.074	204.148	88.6807	99.93	532.15	1.0679	25.4865
1	64PE449_S02C01	2019-02-03T06:13:42	12.8432	-24.0558	17.2157	17.2093	45.1829	38.247	37.997	35.0551	25.5066	59.085	1.955	186.762	191.524	88.8027	99.92	526.96	0.55136	25.4978
1	64PE449_S02C01	2019-02-03T06:13:42	12.8432	-24.0558	17.1507	17.1427	45.1224	39.254	38.996	35.0603	25.5265	60.003	1.8946	181.319	185.946	89.0171	99.92	518.18	0.37831	25.5161
1	64PE449_S02C01	2019-02-03T06:13:42	12.8432	-24.0558	16.8454	16.8399	44.8426	40.26	40.004	35.0859	25.6182	60.831	1.9326	178.319	182.885	89.2336	99.93	519.21	0.51094	25.6052
1	64PE449_S02C01	2019-02-03T06:13:42	12.8432	-24.0558	16.5933	16.5868	44.6028	41.267	41.001	35.1007	25.6891	61.714	1.8496	175.995	180.513	89.2575	99.92	529.84	0.55128	25.672
1	64PE449_S02C01	2019-02-03T06:13:42	12.8432	-24.0558	16.4122	16.4055	44.4324	42.273	42.003	35.1109	25.7393	62.721	1.5749	170.634	175.023	89.8803	99.92	542.81	0.65307	25.7207
1	64PE449_S02C01	2019-02-03T06:13:42	12.8432	-24.0558	16.2285	16.2215	44.259	43.28	42.999	35.12	25.789	63.883	1.3539	163.406	167.617	90.6903	99.93	546.03	0.64035	25.7694
1	64PE449_S02C01	2019-02-03T06:13:42	12.8432	-24.0558	16.0225	16.0157	44.0605	44.287	43.999	35.1266	25.8414	64.964	1.1933	160.281	164.42	91.0703	99.95	535.15	0.59395	25.8207
1	64PE449_S02C01	2019-02-03T06:13:42	12.8432	-24.0558	15.8429	15.8347	43.8977	45.293	44.999	35.1423	25.8948	65.959	1.1021	157.882	161.967	91.4315	99.96	517.58	0.52474	25.872
1	64PE449_S02C01	2019-02-03T06:13:42	12.8432	-24.0558	15.3452	15.3391	43.424	46.3	46	35.1666	26.0253	66.926	0.9952	155.242	159.278	91.7621	99.98	505.52	0.46401	25.9974
1	64PE449_S02C01	2019-02-03T06:13:42	12.8432	-24.0558	15.1999	15.1928	43.2672	47.307	47.003	35.154	26.0481	67.905	0.8362	155.798	159.852	92.285	99.99	510.38	0.42311	26.0201
1	64PE449_S02C01	2019-02-03T06:13:42	12.8432	-24.0558	15.1268	15.1194	43.1922	48.313	48.001	35.148	26.0597	69.009	0.6877	157.908	162.019	92.9526	100	527.84	0.39999	26.0341
1	64PE449_S02C01	2019-02-03T06:13:42	12.8432	-24.0558	15.0291	15.0216	43.1022	49.32	48.999	35.1511	26.0837	70.215	0.5431	155.918	159.981	93.3156	100	539.29	0.37524	26.0598
1	64PE449_S02C01	2019-02-03T06:13:42	12.8432	-24.0558	14.8829	14.8754	42.9604	50.326	49.997	35.1522	26.1167	71.317	0.4768	150.852	154.788	93.4065	100	536.61	0.34103	26.0933
1	64PE449_S02C01	2019-02-03T06:13:42	12.8432	-24.0558	14.8143	14.8065	42.8951	51.333	50.999	35.152	26.1316	72.302	0.416	147.618	151.472	93.5702	100	531.96	0.31093	26.1096
1	64PE449_S02C01	2019-02-03T06:13:42	12.8432	-24.0558	14.6577	14.6498	42.7533	52.34	52.001	35.1636	26.1746	73.259	0.3744	146.072	149.892	93.7917	100	531.06	0.28936	26.152
1	64PE449_S02C01	2019-02-03T06:13:42	12.8432	-24.0558	14.3442	14.3366	42.4534	53.346	53	35.1751	26.251	74.253	0.3369	145.326	149.137	94.0056	100	532.57	0.27321	26.2253
1	64PE449_S02C01	2019-02-03T06:13:42	12.8432	-24.0558	14.2751	14.2672	42.3845	54.353	54	35.1716	26.2631	75.226	0.2922	144.928	148.731	94.2116	100	530.42	0.25644	26.239
1	64PE449_S02C01	2019-02-03T06:13:42	12.8432	-24.0558	14.2368	14.2287	42.3505	55.36	55.003	35.1717	26.2714	76.254	0.2686	144.572	148.367	94.5174	100	527.1	0.24072	26.2495
1	64PE449_S02C01	2019-02-03T06:13:42	12.8432	-24.0558	14.2069	14.1987	42.3251	56.366	56.002	35.1716	26.2777	77.431	0.2474	144.002	147.783	94.5783	100	525.87	0.22635	26.2583
1	64PE449_S02C01	2019-02-03T06:13:42	12.8432	-24.0558	14.1985	14.1901	42.3201	57.373	56.998	35.1705	26.2787	78.723	0.2412	143.748	147.523	94.6169	100	526.57	0.21332	26.2621
1	64PE449_S02C01	2019-02-03T06:13:42	12.8432	-24.0558	14.1911	14.1826	42.3164	58.38	57.996	35.1707	26.2804	79.884	0.2262	143.923	147.703	94.6069	99.99	526.73	0.19918	26.2659
1	64PE449_S02C01	2019-02-03T06:13:42	12.8432	-24.0558	14.1696	14.161	42.2999	59.387	59	35.1729	26.2867	80.874	0.2232	143.699	147.474	94.6067	99.99	517.32	0.18524	26.2735
1	64PE449_S02C01	2019-02-03T06:13:42	12.8432	-24.0558	14.1388	14.1299	42.2762	60.393	59.998	35.1776	26.2969	81.823	0.2271	143.55	147.323	94.6351	99.99	506.87	0.17334	26.2844
1	64PE449_S02C01	2019-02-03T06:13:42	12.8432	-24.0558	14.0937	14.0849	42.2387	61.4	61.001	35.1828	26.3105	82.713	0.2344	143.592	147.368	94.6773	99.99	505.78	0.16274	26.2985
1	64PE449_S02C01	2019-02-03T06:13:42	12.8432	-24.0558	14.0698	14.0607	42.2177	62.407	62.002	35.1838	26.3164	83.612	0.2143	143.868	147.652	94.7069	99.98	518.63	0.15429	26.305
1	64PE449_S02C01	2019-02-03T06:13:42	12.8432	-24.0558	14.029	14.0201	42.1801	63.413	63.003	35.1848	26.3257	84.611	0.2084	143.961	147.749	94.754	99.98	543.11	0.14818	26.315
1	64PE449_S02C01	2019-02-03T06:13:42	12.8432	-24.0558	14.0013	13.992	42.1528	64.42	64.002	35.1834	26.3306	85.765	0.195	144.137	147.931	94.7788	99.98	556.76	0.14175	26.3204
1	64PE449_S02C01	2019-02-03T06:13:42	12.8432	-24.0558	13.9819	13.9725	42.1343	65.427	64.999	35.182	26.3336	87.096	0.1855	142.276	146.021	94.8254	99.98	547.65	0.13428	26.3245
1	64PE449_S02C01	2019-02-03T06:13:42	12.8432	-24.0558	13.9557	13.9461	42.1094	66.434	65.998	35.1816	26.3389	88.31	0.1846	138.208	141.847	94.8615	99.98	536.44	0.12419	26.3304
1	64PE449_S02C01	2019-02-03T06:13:42	12.8432	-24.0558	13.9	13.8904	42.054	67.44	66.998	35.1806	26.3498	89.363	0.1748	134.152	137.686	94.893	99.98	535.06	0.11442	26.3411
1	64PE449_S02C01	2019-02-03T06:13:42	12.8432	-24.0558	13.8413	13.8315	41.995	68.447	67.998	35.1791	26.361	90.332	0.1678	131.51	134.976	94.8798	99.98	534.19	0.10632	26.352
1	64PE449_S02C01	2019-02-03T06:13:42	12.8432	-24.0558	13.8003	13.7904	41.9544	69.454	69.001	35.1783	26.369	91.263	0.1612	129.296	132.704	94.9533	99.98	530.91	0.10028	26.3599
1	64PE449_S02C01	2019-02-03T06:13:42	12.8432	-24.0558	13.7538	13.7438	41.9133	70.46	69.998	35.182	26.3816	92.188	0.1423	126.78	130.124	94.9895	99.97	526.42	0.09556	26.3725
1	64PE449_S02C01	2019-02-03T06:13:42	12.8432	-24.0558	13.7308	13.7206	41.8931	71.467	70.999	35.1833	26.3874	93.081	0.1331	124.597	127.884	95.0139	99.96	516.95	0.09093	26.3787
1	64PE449_S02C01	2019-02-03T06:13:42	12.8432	-24.0558	13.7139	13.7036	41.8803	72.474	72.001	35.1859	26.3929	93.947	0.1272	122.973	126.218	95.0964	99.94	506.44	0.0868	26.3846
1	64PE449_S02C01	2019-02-03T06:13:42	12.8432	-24.0558	13.6707	13.6603	41.8394	73.481	73.005	35.1868	26.4026	94.853	0.1375	121.983	125.203	95.1008	94.02	505.68	0.08352	26.3942
1	64PE449_S02C01	2019-02-03T06:13:42	12.8432	-24.0558	13.6274	13.6169	41.7983	74.487	74.001	35.1876	26.4122	95.894	0.1551	121.353	124.557	95.1356	93.93	521.69	0.0807	26.4038
1	64PE449_S02C01	2019-02-03T06:13:42	12.8432	-24.0558	13.5815	13.5708	41.755	75.494	74.998	35.1886	26.4226	97.034	0.1404	120.971	124.166	95.1532	99.96	536.14	0.07641	26.4142
1	64PE449_S02C01	2019-02-03T06:13:42	12.8432	-24.0558	13.5582	13.5474	41.7325	76.501	75.998	35.1879	26.4268	98.078	0.1309	120.712	123.901	95.1701	99.87	530.66	0.07107	26.4188
1	64PE449_S02C01	2019-02-03T06:13:42	12.8432	-24.0558	13.5498	13.5389	41.7248	77.508	77.004	35.1872	26.4281	99.06	0.1304	120.407	123.588	95.1729	99.84	524.62	0.06619	26.4206
1	64PE449_S02C01	2019-02-03T06:13:42	12.8432	-24.0558	13.5414	13.5303	41.7172	78.515	78.001	35.1866	26.4293	100.2	0.1193	119.965	123.135	95.1865	99.83	534.16	0.06323	26.4225
1	64PE449_S02C01	2019-02-03T06:13:42	12.8432	-24.0558	13.5355	13.5242	41.7121	79.521	78.997	35.1859	26.4301	101.478	0.1183	119.102	122.249	95.1851	99.82	549.52	0.06293	26.4239
1	64PE449_S02C01	2019-02-03T06:13:42	12.8432	-24.0558	13.5276	13.5163	41.7051	80.528	79.997	35.1856	26.4315	102.589	0.1224	117.846	120.96	95.2087	99.82	546.91	0.06294	26.4257
1	64PE449_S02C01	2019-02-03T06:13:42	12.8432	-24.0558	13.5231	13.5115	41.7011	81.535	80.998	35.1851	26.4321	103.539	0.1232	116.385	119.461	95.2327	99.81	532.12	0.06294	26.4266
1	64PE449_S02C01	2019-02-03T06:13:42	12.8432	-24.0558	13.5178	13.5062	41.6967	82.542	82	35.1851	26.4332	104.4	0.1186	115.27	118.316	95.2169	99.8	520.86	0.06294	26.4279
1	64PE449_S02C01	2019-02-03T06:13:42	12.8432	-24.0558	13.5035	13.4917	41.6831	83.549	83.003	35.185	26.4361	105.259	0.1167	114.411	117.435	95.2165	99.8	520.95	0.06294	26.4308
1	64PE449_S02C01	2019-02-03T06:13:42	12.8432	-24.0558	13.4786	13.4668	41.6604	84.555	84.002	35.1862	26.4422	106.21	0.1158	113.962	116.975	95.254	99.79	531.11	0.06294	26.4367
1	64PE449_S02C01	2019-02-03T06:13:42	12.8432	-24.0558	13.4586	13.4466	41.6409	85.562	85.001	35.1858	26.446	107.242	0.111	113.967	116.98	95.2424	99.79	536.56	0.06294	26.4406
1	64PE449_S02C01	2019-02-03T06:13:42	12.8432	-24.0558	13.4368	13.4246	41.62	86.569	85.997	35.1858	26.4505	108.307	0.1054	113.926	116.939	95.2634	99.77	527.48	0.06294	26.445
1	64PE449_S02C01	2019-02-03T06:13:42	12.8432	-24.0558	13.4253	13.413	41.6081	87.576	86.999	35.1846	26.452	109.255	0.1068	112.498	115.473	95.2518	99.77	515.19	0.06294	26.4466
1	64PE449_S02C01	2019-02-03T06:13:42	12.8432	-24.0558	13.4194	13.407	41.6027	88.583	88.003	35.1841	26.4528	110.184	0.1123	109.259	112.149	95.2437	99.76	513.78	0.06294	26.4477
1	64PE449_S02C01	2019-02-03T06:13:42	12.8432	-24.0558	13.4141	13.4015	41.5978	89.59	89.001	35.1837	26.4536	111.23	0.1142	106.078	108.884	95.2527	99.75	528.73	0.06294	26.4487
1	64PE449_S02C01	2019-02-03T06:13:42	12.8432	-24.0558	13.376	13.3633	41.5625	90.596	90.002	35.1856	26.463	112.386	0.121	104.73	107.501	95.244	99.75	544.65	0.06294	26.4575
1	64PE449_S02C01	2019-02-03T06:13:42	12.8432	-24.0558	13.277	13.2643	41.4644	91.603	90.996	35.1856	26.4832	113.562	0.115	104.52	107.287	95.2601	99.74	540.94	0.06294	26.4765
1	64PE449_S02C01	2019-02-03T06:13:42	12.8432	-24.0558	13.2528	13.2399	41.4397	92.61	92.001	35.1841	26.487	114.614	0.1163	104.647	107.418	95.2627	99.73	533.09	0.06294	26.4802
1	64PE449_S02C01	2019-02-03T06:13:42	12.8432	-24.0558	13.243	13.23	41.4303	93.617	92.998	35.1833	26.4884	115.647	0.1126	104.41	107.175	95.2751	99.7	528.85	0.06294	26.482
1	64PE449_S02C01	2019-02-03T06:13:42	12.8432	-24.0558	13.2405	13.2273	41.4282	94.624	93.998	35.1827	26.4884	116.623	0.1075	103.102	105.832	95.2653	99.68	524.49	0.06294	26.4825
1	64PE449_S02C01	2019-02-03T06:13:42	12.8432	-24.0558	13.2383	13.2251	41.4268	95.631	94.997	35.1824	26.4887	117.544	0.1072	101.516	104.204	95.2725	99.67	524.01	0.06294	26.483
1	64PE449_S02C01	2019-02-03T06:13:42	12.8432	-24.0558	13.2312	13.2178	41.421	96.638	96.006	35.1828	26.4905	118.435	0.1153	99.83	102.474	95.2985	99.67	530.83	0.06294	26.485
1	64PE449_S02C01	2019-02-03T06:13:42	12.8432	-24.0558	13.206	13.1925	41.398	97.645	97.001	35.184	26.4965	119.447	0.1158	97.809	100.4	95.2822	99.67	540.1	0.06294	26.4909
1	64PE449_S02C01	2019-02-03T06:13:42	12.8432	-24.0558	13.1852	13.1715	41.3786	98.651	97.997	35.1845	26.5012	120.558	0.1109	96.326	98.8782	95.2838	99.66	536.69	0.06294	26.4955
1	64PE449_S02C01	2019-02-03T06:13:42	12.8432	-24.0558	13.1651	13.1513	41.3604	99.658	98.999	35.1853	26.5059	121.564	0.1069	95.93	98.4722	95.3236	99.65	522.23	0.06294	26.5002
1	64PE449_S02C01	2019-02-03T06:13:42	12.8432	-24.0558	13.1476	13.1337	41.3434	100.665	99.998	35.1849	26.5092	122.484	0.1014	95.915	98.4571	95.2932	99.64	510.84	0.06294	26.5035
1	64PE449_S02C01	2019-02-03T06:13:42	12.8432	-24.0558	13.1272	13.1132	41.3235	101.672	101.005	35.1845	26.5131	123.376	0.1072	95.957	98.5006	95.3049	99.63	511.26	0.06294	26.5073
1	64PE449_S02C01	2019-02-03T06:13:42	12.8432	-24.0558	13.0959	13.0817	41.2904	102.679	102.002	35.1819	26.5174	124.379	0.0992	95.792	98.3316	95.2972	99.62	522.78	0.06294	26.5114
1	64PE449_S02C01	2019-02-03T06:13:42	12.8432	-24.0558	13.0789	13.0646	41.2736	103.686	103.001	35.1811	26.5202	125.521	0.1074	95.581	98.1153	95.3089	99.61	540.86	0.06294	26.5143
1	64PE449_S02C01	2019-02-03T06:13:42	12.8432	-24.0558	13.0699	13.0555	41.2643	104.693	103.998	35.1798	26.5211	126.738	0.0951	95.486	98.0178	95.2757	99.6	549.01	0.06294	26.5154
1	64PE449_S02C01	2019-02-03T06:13:42	12.8432	-24.0558	13.0615	13.0468	41.2562	105.7	105.001	35.1792	26.5224	127.858	0.0929	95.794	98.3342	95.2795	99.59	544.49	0.06294	26.5169
1	64PE449_S02C01	2019-02-03T06:13:42	12.8432	-24.0558	13.0215	13.0069	41.2143	106.707	105.998	35.1763	26.5282	128.964	0.0998	95.748	98.2875	95.2813	99.58	539.94	0.06294	26.5224
1	64PE449_S02C01	2019-02-03T06:13:42	12.8432	-24.0558	13.0115	12.9966	41.203	107.714	106.999	35.1743	26.5287	129.993	0.1012	95.825	98.3666	95.3084	99.58	539.56	0.06294	26.523
1	64PE449_S02C01	2019-02-03T06:13:42	12.8432	-24.0558	13.0063	12.9914	41.1974	108.721	107.998	35.173	26.5287	130.933	0.1034	96.007	98.5534	95.3087	99.58	536.45	0.06294	26.5232
1	64PE449_S02C01	2019-02-03T06:13:42	12.8432	-24.0558	13.0063	12.9912	41.1979	109.728	109	35.1727	26.5285	131.815	0.1009	96.003	98.5493	95.3148	99.58	531.37	0.06294	26.5233
1	64PE449_S02C01	2019-02-03T06:13:42	12.8432	-24.0558	13.0058	12.9905	41.1978	110.734	110.003	35.1723	26.5283	132.678	0.0976	95.746	98.2855	95.2968	99.58	528.75	0.06294	26.5233
1	64PE449_S02C01	2019-02-03T06:13:42	12.8432	-24.0558	13.0049	12.9896	41.1974	111.741	111.002	35.172	26.5283	133.641	0.1016	95.534	98.0679	95.2801	99.58	527.47	0.06294	26.5235
1	64PE449_S02C01	2019-02-03T06:13:42	12.8432	-24.0558	13.0041	12.9886	41.1969	112.748	112.001	35.1716	26.5281	134.692	0.1006	95.233	97.7589	95.2808	99.58	524.66	0.06294	26.5235
1	64PE449_S02C01	2019-02-03T06:13:42	12.8432	-24.0558	13.0032	12.9876	41.1966	113.755	113	35.1714	26.5282	135.793	0.1125	94.232	96.7314	95.3081	99.58	522.36	0.06294	26.5238
1	64PE449_S02C01	2019-02-03T06:13:42	12.8432	-24.0558	13.0026	12.9868	41.1965	114.762	114.001	35.1712	26.5283	136.88	0.1119	93.432	95.9102	95.3325	99.58	524.46	0.06294	26.524
1	64PE449_S02C01	2019-02-03T06:13:42	12.8432	-24.0558	12.9978	12.9819	41.1926	115.769	114.999	35.1714	26.5294	138.008	0.1017	92.304	94.7524	95.3182	99.58	528.93	0.06294	26.5252
1	64PE449_S02C01	2019-02-03T06:13:42	12.8432	-24.0558	12.9955	12.9794	41.1904	116.776	115.998	35.171	26.5296	139.084	0.1083	91.766	94.2001	95.2891	99.58	525.6	0.06294	26.5254
1	64PE449_S02C01	2019-02-03T06:13:42	12.8432	-24.0558	12.9868	12.9706	41.1824	117.783	116.997	35.1711	26.5314	140.059	0.107	91.719	94.152	95.2898	99.57	518.12	0.06294	26.5271
1	64PE449_S02C01	2019-02-03T06:13:42	12.8432	-24.0558	12.9699	12.9537	41.1657	118.79	118	35.1705	26.5344	140.962	0.1039	91.815	94.2509	95.2774	99.57	516.86	0.06294	26.53
1	64PE449_S02C01	2019-02-03T06:13:42	12.8432	-24.0558	12.9562	12.9397	41.1509	119.797	118.999	35.169	26.536	141.837	0.0973	91.387	93.8116	95.3113	99.57	525.05	0.06294	26.5314
1	64PE449_S02C01	2019-02-03T06:13:42	12.8432	-24.0558	12.9455	12.9289	41.1396	120.804	120.004	35.1678	26.5372	142.747	0.0947	90.529	92.931	95.2998	99.57	539.61	0.06294	26.5325
1	64PE449_S02C01	2019-02-03T06:13:42	12.8432	-24.0558	12.9302	12.9136	41.1233	121.811	121.002	35.1661	26.539	143.772	0.0981	89.633	92.0113	95.3081	99.56	548.96	0.06294	26.5341
1	64PE449_S02C01	2019-02-03T06:13:42	12.8432	-24.0558	12.9163	12.8995	41.1089	122.818	122	35.1649	26.5408	144.876	0.1045	89.08	91.4438	95.2994	99.56	543.05	0.06294	26.5359
1	64PE449_S02C01	2019-02-03T06:13:42	12.8432	-24.0558	12.9039	12.887	41.0964	123.825	123	35.1641	26.5427	146.029	0.1051	89.122	91.4871	95.301	99.56	532.62	0.06294	26.5378
1	64PE449_S02C01	2019-02-03T06:13:42	12.8432	-24.0558	12.8799	12.8629	41.0709	124.832	123.997	35.1618	26.5459	147.146	0.103	89.383	91.7553	95.3087	99.56	529.47	0.06294	26.5407
1	64PE449_S02C01	2019-02-03T06:13:42	12.8432	-24.0558	12.8741	12.8569	41.0649	125.839	124.999	35.161	26.5463	148.153	0.1061	89.459	91.8333	95.2857	99.55	527.83	0.06294	26.5412
1	64PE449_S02C01	2019-02-03T06:13:42	12.8432	-24.0558	12.8702	12.8528	41.0615	126.846	125.997	35.1607	26.547	149.092	0.1021	89.482	91.857	95.2939	99.55	522.3	0.06294	26.542
1	64PE449_S02C01	2019-02-03T06:13:42	12.8432	-24.0558	12.8584	12.841	41.0491	127.853	127	35.1594	26.5483	149.969	0.1035	89.409	91.7822	95.2217	99.54	511.98	0.06294	26.5432
1	64PE449_S02C01	2019-02-03T06:13:42	12.8432	-24.0558	12.8491	12.8315	41.0391	128.86	128.002	35.1581	26.5492	150.837	0.1001	89.224	91.5924	95.2799	99.55	504.79	0.06294	26.5441
1	64PE449_S02C01	2019-02-03T06:13:42	12.8432	-24.0558	12.8449	12.8272	41.0352	129.867	129.003	35.1577	26.5498	151.783	0.1005	89.079	91.4436	95.2386	99.54	506.01	0.06294	26.5448
1	64PE449_S02C01	2019-02-03T06:13:42	12.8432	-24.0558	12.8183	12.8005	41.0077	130.874	130.001	35.1561	26.5538	152.822	0.1055	88.929	91.2899	95.3119	99.54	522.44	0.06294	26.5485
1	64PE449_S02C01	2019-02-03T06:13:42	12.8432	-24.0558	12.7971	12.7792	40.9841	131.881	131.001	35.1529	26.5556	153.945	0.1105	87.886	90.2194	95.3031	99.54	537.88	0.06294	26.5501
1	64PE449_S02C01	2019-02-03T06:13:42	12.8432	-24.0558	12.7768	12.7587	40.9625	132.888	131.996	35.1509	26.5581	155.073	0.1106	86.054	88.3389	95.338	99.54	533.7	0.06294	26.5525
1	64PE449_S02C01	2019-02-03T06:13:42	12.8432	-24.0558	12.7654	12.7472	40.9507	133.895	132.998	35.1498	26.5595	156.032	0.1072	85.087	87.3464	95.3063	99.54	518.99	0.06294	26.5539
1	64PE449_S02C01	2019-02-03T06:13:42	12.8432	-24.0558	12.7183	12.7	40.903	134.902	133.999	35.1483	26.5678	156.925	0.1159	84.981	87.2382	95.3333	99.54	510.37	0.06294	26.5614
1	64PE449_S02C01	2019-02-03T06:13:42	12.8432	-24.0558	12.6771	12.6587	40.859	135.91	135.003	35.1447	26.5732	157.795	0.1196	84.837	87.0908	95.3046	99.54	515.97	0.06294	26.5663
1	64PE449_S02C01	2019-02-03T06:13:42	12.8432	-24.0558	12.6633	12.6448	40.8449	136.917	136.001	35.1433	26.5748	158.759	0.1172	84.524	86.7696	95.2779	99.53	531.73	0.06294	26.5681
1	64PE449_S02C01	2019-02-03T06:13:42	12.8432	-24.0558	12.6456	12.6269	40.8258	137.924	137.001	35.141	26.5766	159.82	0.1096	84.371	86.6127	95.3099	99.53	547.45	0.06294	26.5699
1	64PE449_S02C01	2019-02-03T06:13:42	12.8432	-24.0558	12.6354	12.6167	40.8145	138.931	137.999	35.1388	26.5769	160.971	0.1035	84.142	86.3777	95.3158	99.52	548.7	0.06294	26.5705
1	64PE449_S02C01	2019-02-03T06:13:42	12.8432	-24.0558	12.6293	12.6104	40.8083	139.938	138.997	35.1378	26.5774	162.068	0.1069	83.914	86.1437	95.2983	99.51	535.75	0.06294	26.5712
1	64PE449_S02C01	2019-02-03T06:13:42	12.8432	-24.0558	12.6203	12.6013	40.7992	140.945	139.999	35.1367	26.5784	163.054	0.1043	83.753	85.9785	95.2729	99.52	516.45	0.06294	26.5723
1	64PE449_S02C01	2019-02-03T06:13:42	12.8432	-24.0558	12.6191	12.6	40.7984	141.952	140.998	35.1363	26.5783	163.979	0.1022	83.788	86.0145	95.2796	99.51	507.06	0.06294	26.5725
1	64PE449_S02C01	2019-02-03T06:13:42	12.8432	-24.0558	12.6193	12.6	40.7991	142.959	142.003	35.1361	26.5781	164.871	0.114	83.83	86.0576	95.2864	99.51	511.48	0.06294	26.5725
1	64PE449_S02C01	2019-02-03T06:13:42	12.8432	-24.0558	12.6194	12.6	40.7998	143.966	143.002	35.1359	26.578	165.826	0.119	83.945	86.1756	95.2981	99.5	524.36	0.06294	26.5726
1	64PE449_S02C01	2019-02-03T06:13:42	12.8432	-24.0558	12.6197	12.6002	40.8007	144.973	144	35.1357	26.5778	166.875	0.1242	83.449	85.6665	95.2877	99.51	531.8	0.06294	26.5726
1	64PE449_S02C01	2019-02-03T06:13:42	12.8432	-24.0558	12.6185	12.5989	40.8	145.981	144.997	35.1356	26.5779	167.888	0.1238	82.183	84.3668	95.2966	99.51	528.56	0.06294	26.5729
1	64PE449_S02C01	2019-02-03T06:13:42	12.8432	-24.0558	12.6184	12.5986	40.8004	146.988	146.002	35.1355	26.5779	168.803	0.1179	80.945	83.0959	95.2992	99.51	525.72	0.06294	26.5729
1	64PE449_S02C01	2019-02-03T06:13:42	12.8432	-24.0558	12.6162	12.5963	40.7991	147.995	147.003	35.1357	26.5786	169.799	0.117	80.336	82.4708	95.3166	99.51	536.09	0.06294	26.5736
1	64PE449_S02C01	2019-02-03T06:13:42	12.8432	-24.0558	12.5912	12.5711	40.7751	149.002	148.002	35.1359	26.5837	170.956	0.1111	79.671	81.7885	95.298	99.5	551.67	0.06294	26.5784
1	64PE449_S02C01	2019-02-03T06:13:42	12.8432	-24.0558	12.5776	12.5575	40.7623	150.009	148.997	35.1359	26.5863	172.224	0.1155	78.694	80.7858	95.2633	99.5	548.78	0.06294	26.581
1	64PE449_S02C01	2019-02-03T06:13:42	12.8432	-24.0558	12.5739	12.5535	40.7591	151.016	149.998	35.1357	26.587	173.319	0.1209	78.183	80.2612	95.1895	99.5	530.73	0.06294	26.5818
1	64PE449_S02C01	2019-02-03T06:13:42	12.8432	-24.0558	12.5613	12.5409	40.7479	152.023	150.997	35.1364	26.59	174.259	0.1211	77.51	79.5706	95.2595	99.5	514.12	0.06294	26.5847
1	64PE449_S02C01	2019-02-03T06:13:42	12.8432	-24.0558	12.55	12.5295	40.7373	153.031	151.998	35.1364	26.5923	175.11	0.1147	76.364	78.3943	95.3176	99.49	505.64	0.06294	26.5868
1	64PE449_S02C01	2019-02-03T06:13:42	12.8432	-24.0558	12.5472	12.5265	40.7348	154.038	153.002	35.136	26.5925	175.922	0.1111	75.031	77.0259	95.304	99.49	508.6	0.06294	26.5871
1	64PE449_S02C01	2019-02-03T06:13:42	12.8432	-24.0558	12.5401	12.5191	40.7281	155.045	154.002	35.1359	26.5939	176.789	0.1133	73.291	75.2397	95.3137	99.49	521.58	0.06294	26.5884
1	64PE449_S02C01	2019-02-03T06:13:42	12.8432	-24.0558	12.5018	12.481	40.6902	156.052	155	35.1353	26.6009	177.711	0.1055	71.972	73.8861	95.3362	99.48	530.24	0.06294	26.595
1	64PE449_S02C01	2019-02-03T06:13:42	12.8432	-24.0558	12.4887	12.4676	40.6766	157.059	156.001	35.134	26.6026	178.663	0.1053	71.381	73.2795	95.3384	99.48	530.39	0.06294	26.5965
1	64PE449_S02C01	2019-02-03T06:13:42	12.8432	-24.0558	12.4303	12.4093	40.6187	158.066	157.001	35.1334	26.6135	179.649	0.1156	71.026	72.9158	95.3136	99.47	531.7	0.06294	26.6067
1	64PE449_S02C01	2019-02-03T06:13:42	12.8432	-24.0558	12.4141	12.3929	40.6006	159.073	158.002	35.1306	26.6145	180.68	0.1201	70.499	72.3748	95.3109	99.47	537.68	0.06294	26.6076
1	64PE449_S02C01	2019-02-03T06:13:42	12.8432	-24.0558	12.4088	12.3874	40.5961	160.081	159.002	35.1304	26.6154	181.824	0.1167	70.139	72.0053	95.3181	99.46	542.4	0.06294	26.6088
1	64PE449_S02C01	2019-02-03T06:13:42	12.8432	-24.0558	12.4059	12.3844	40.5951	161.088	159.998	35.1312	26.6167	183.077	0.1127	70.291	72.1615	95.2909	99.46	541.92	0.06294	26.6104
1	64PE449_S02C01	2019-02-03T06:13:42	12.8432	-24.0558	12.3946	12.3729	40.5849	162.095	160.999	35.1315	26.6191	184.206	0.1107	70.432	72.3064	95.2936	99.45	539.03	0.06294	26.6129
1	64PE449_S02C01	2019-02-03T06:13:42	12.8432	-24.0558	12.3434	12.3218	40.5304	163.102	161.999	35.1271	26.6257	185.238	0.1094	70.425	72.2996	95.3171	99.45	534.33	0.06294	26.6187
1	64PE449_S02C01	2019-02-03T06:13:42	12.8432	-24.0558	12.3193	12.2976	40.5034	164.11	162.998	35.1233	26.6274	186.194	0.114	70.364	72.2371	95.2525	99.45	526.13	0.06294	26.6203
1	64PE449_S02C01	2019-02-03T06:13:42	12.8432	-24.0558	12.3095	12.2876	40.4932	165.117	163.998	35.1219	26.6283	187.087	0.1214	70.245	72.115	95.2989	99.45	519.92	0.06294	26.6213
1	64PE449_S02C01	2019-02-03T06:13:42	12.8432	-24.0558	12.2973	12.2753	40.4807	166.124	165.003	35.1207	26.6298	187.936	0.1161	70.166	72.034	95.2924	99.45	520.97	0.06294	26.6228
1	64PE449_S02C01	2019-02-03T06:13:42	12.8432	-24.0558	12.2839	12.2618	40.467	167.131	165.999	35.1195	26.6315	188.808	0.1078	70.429	72.3041	95.268	99.45	523.44	0.06294	26.6245
1	64PE449_S02C01	2019-02-03T06:13:42	12.8432	-24.0558	12.277	12.2547	40.4602	168.138	167	35.1187	26.6323	189.687	0.1029	70.618	72.4982	95.292	99.45	523.8	0.06294	26.6255
1	64PE449_S02C01	2019-02-03T06:13:42	12.8432	-24.0558	12.2695	12.2471	40.4527	169.146	168	35.1179	26.6331	190.535	0.1093	70.408	72.2827	95.3143	99.45	523.36	0.06294	26.6264
1	64PE449_S02C01	2019-02-03T06:13:42	12.8432	-24.0558	12.2582	12.2357	40.441	170.153	169.003	35.1166	26.6343	191.419	0.1164	69.902	71.7633	95.3193	99.45	527.77	0.06294	26.6276
1	64PE449_S02C01	2019-02-03T06:13:42	12.8432	-24.0558	12.2441	12.2215	40.4265	171.16	170.001	35.1153	26.6361	192.385	0.1191	68.977	70.8138	95.3001	99.45	538.37	0.06294	26.6294
1	64PE449_S02C01	2019-02-03T06:13:42	12.8432	-24.0558	12.2095	12.1868	40.3912	172.167	171.003	35.1136	26.6414	193.445	0.1203	67.945	69.7547	95.3191	99.45	550.65	0.06294	26.6343
1	64PE449_S02C01	2019-02-03T06:13:42	12.8432	-24.0558	12.1645	12.1417	40.3442	173.175	172.001	35.1103	26.6476	194.657	0.1206	66.022	67.7808	95.2939	99.45	554.11	0.06294	26.6401
1	64PE449_S02C01	2019-02-03T06:13:42	12.8432	-24.0558	12.1086	12.0858	40.2853	174.182	172.997	35.1058	26.6549	195.93	0.119	62.21	63.8677	95.2701	99.45	551.4	0.06294	26.6468
1	64PE449_S02C01	2019-02-03T06:13:42	12.8432	-24.0558	12.0655	12.0426	40.239	175.189	173.998	35.1012	26.6596	197.022	0.1036	59.2	60.7777	95.3204	99.44	546.28	0.06294	26.6511
1	64PE449_S02C01	2019-02-03T06:13:42	12.8432	-24.0558	12.0262	12.0032	40.1982	176.196	174.996	35.0983	26.6649	197.988	0.107	58.335	59.89	95.3258	99.44	543.13	0.06294	26.6561
1	64PE449_S02C01	2019-02-03T06:13:42	12.8432	-24.0558	11.9937	11.9707	40.1652	177.204	175.999	35.0964	26.6697	198.842	0.1091	58.591	60.1531	95.313	99.45	540.59	0.06294	26.6607
1	64PE449_S02C01	2019-02-03T06:13:42	12.8432	-24.0558	11.9689	11.9457	40.1392	178.211	177	35.094	26.6726	199.645	0.1154	58.815	60.3832	95.2808	99.44	539.08	0.06294	26.6636
1	64PE449_S02C01	2019-02-03T06:13:42	12.8432	-24.0558	11.9599	11.9366	40.1302	179.218	178.004	35.0929	26.6734	200.438	0.1156	58.771	60.3381	95.2533	99.44	539.62	0.06294	26.6647
1	64PE449_S02C01	2019-02-03T06:13:42	12.8432	-24.0558	11.9514	11.9279	40.1212	180.225	179.001	35.0912	26.6738	201.307	0.1235	58.48	60.0394	95.1971	99.44	544.53	0.06294	26.6654
1	64PE449_S02C01	2019-02-03T06:13:42	12.8432	-24.0558	11.9474	11.9238	40.1177	181.233	180.002	35.0906	26.6741	202.238	0.1226	58.135	59.6852	95.2339	99.43	552.36	0.06294	26.6661
1	64PE449_S02C01	2019-02-03T06:13:42	12.8432	-24.0558	11.9429	11.9192	40.1135	182.24	181.001	35.0898	26.6743	203.258	0.1205	57.42	58.9512	95.206	99.42	555.04	0.06294	26.6667
1	64PE449_S02C01	2019-02-03T06:13:42	12.8432	-24.0558	11.9365	11.9127	40.1074	183.247	182.001	35.089	26.6749	204.368	0.1229	56.6	58.1094	95.2052	99.42	544.79	0.06294	26.6676
1	64PE449_S02C01	2019-02-03T06:13:42	12.8432	-24.0558	11.9311	11.9071	40.1024	184.255	183.001	35.0884	26.6755	205.572	0.1221	55.915	57.4062	95.1993	99.42	533.18	0.06294	26.6685
1	64PE449_S02C01	2019-02-03T06:13:42	12.8432	-24.0558	11.9139	11.8899	40.0855	185.262	183.995	35.0874	26.6781	206.742	0.1181	55.802	57.2903	95.2234	99.41	530.94	0.06294	26.6711
1	64PE449_S02C01	2019-02-03T06:13:42	12.8432	-24.0558	11.8968	11.8727	40.0679	186.269	184.997	35.086	26.6802	207.716	0.117	56.031	57.5255	95.1675	99.42	532.48	0.06294	26.6732
1	64PE449_S02C01	2019-02-03T06:13:42	12.8432	-24.0558	11.8792	11.8549	40.0503	187.277	186	35.085	26.6828	208.598	0.1184	56.18	57.6786	95.1492	99.42	536.06	0.06294	26.6757
1	64PE449_S02C01	2019-02-03T06:13:42	12.8432	-24.0558	11.8614	11.837	40.0322	188.284	187.003	35.0838	26.6853	209.453	0.1159	56.375	57.879	95.2142	99.42	544.48	0.06294	26.6781
1	64PE449_S02C01	2019-02-03T06:13:42	12.8432	-24.0558	11.8339	11.8095	40.003	189.291	187.998	35.0809	26.6883	210.369	0.1199	56.421	57.9264	95.2261	99.42	555.49	0.06294	26.6808
1	64PE449_S02C01	2019-02-03T06:13:42	12.8432	-24.0558	11.8286	11.804	39.9974	190.299	188.999	35.0797	26.6884	211.271	0.1158	55.904	57.3956	95.2355	99.42	560.16	0.06294	26.6811
1	64PE449_S02C01	2019-02-03T06:13:42	12.8432	-24.0558	11.8228	11.798	39.9915	191.306	189.997	35.0788	26.6888	212.105	0.118	55.21	56.6831	95.2339	99.41	556.13	0.06294	26.6817
1	64PE449_S02C01	2019-02-03T06:13:42	12.8432	-24.0558	11.804	11.7791	39.9727	192.313	191.002	35.0777	26.6916	212.909	0.1198	54.692	56.1514	95.231	99.41	550.75	0.06294	26.6843
1	64PE449_S02C01	2019-02-03T06:13:42	12.8432	-24.0558	11.7922	11.7673	39.9603	193.321	192.002	35.0762	26.6926	213.744	0.1178	54.539	55.9944	95.2352	99.42	547.44	0.06294	26.6854
1	64PE449_S02C01	2019-02-03T06:13:42	12.8432	-24.0558	11.7854	11.7604	39.9539	194.328	193.002	35.0756	26.6935	214.663	0.1136	54.6	56.0571	95.2592	99.41	547.51	0.06294	26.6864
1	64PE449_S02C01	2019-02-03T06:13:42	12.8432	-24.0558	11.781	11.7558	39.9497	195.335	194.003	35.0749	26.6938	215.673	0.1196	54.597	56.054	95.2453	99.41	552.03	0.06294	26.6869
1	64PE449_S02C01	2019-02-03T06:13:42	12.8432	-24.0558	11.7805	11.7551	39.9495	196.343	195.004	35.0744	26.6936	216.884	0.1242	54.431	55.8836	95.2216	99.42	549.08	0.06294	26.687
1	64PE449_S02C01	2019-02-03T06:13:42	12.8432	-24.0558	11.78	11.7545	39.9496	197.35	195.997	35.0741	26.6935	218.384	0.1221	53.311	54.7337	95.2255	99.41	539.91	0.06294	26.6872
1	64PE449_S02C01	2019-02-03T06:13:42	12.8432	-24.0558	11.7752	11.7496	39.9453	198.357	196.995	35.0738	26.6942	219.633	0.1121	52.088	53.4781	95.2255	99.41	535.71	0.06294	26.688
1	64PE449_S02C01	2019-02-03T06:13:42	12.8432	-24.0558	11.7616	11.7358	39.9319	199.365	197.995	35.0733	26.6963	220.594	0.1115	51.552	52.9279	95.2413	99.41	536.07	0.06294	26.69
1	64PE449_S02C01	2019-02-03T06:13:42	12.8432	-24.0558	11.7133	11.6877	39.8831	200.372	198.997	35.0713	26.7038	221.405	0.1186	51.277	52.6459	95.2451	99.41	534.34	0.06294	26.6969
1	64PE449_S02C01	2019-02-03T06:13:42	12.8432	-24.0558	11.6957	11.6698	39.8632	201.379	199.999	35.0684	26.7049	222.148	0.1131	51.097	52.4612	95.2005	99.41	533.02	0.06294	26.6976
1	64PE449_S02C01	2019-02-03T06:13:42	12.8432	-24.0558	11.6771	11.6512	39.8444	202.387	201.004	35.0671	26.7075	222.86	0.1163	50.935	52.295	95.1996	99.41	534.23	0.06294	26.7
1	64PE449_S02C01	2019-02-03T06:13:42	12.8432	-24.0558	11.6655	11.6394	39.8322	203.394	202.002	35.0657	26.7086	223.626	0.1241	50.683	52.0363	95.2424	99.41	540.12	0.06294	26.7011
1	64PE449_S02C01	2019-02-03T06:13:42	12.8432	-24.0558	11.6584	11.6322	39.8249	204.402	203.004	35.0646	26.7091	224.464	0.1238	50.465	51.8125	95.2457	99.41	549.39	0.06294	26.7017
1	64PE449_S02C01	2019-02-03T06:13:42	12.8432	-24.0558	11.6517	11.6254	39.8184	205.409	204.004	35.0638	26.7097	225.441	0.1178	50.3	51.6431	95.2494	99.41	562.95	0.06294	26.7026
1	64PE449_S02C01	2019-02-03T06:13:42	12.8432	-24.0558	11.6379	11.6114	39.8045	206.416	205.002	35.0627	26.7115	226.7	0.1307	50.024	51.3599	95.2293	99.41	576.03	0.06294	26.7044
1	64PE449_S02C01	2019-02-03T06:13:42	12.8432	-24.0558	11.6143	11.5877	39.7802	207.424	205.997	35.0607	26.7144	228.125	0.1212	49.854	51.1855	95.2372	99.41	583.25	0.06294	26.7072
1	64PE449_S02C01	2019-02-03T06:13:42	12.8432	-24.0558	11.5919	11.5654	39.7567	208.431	206.997	35.0583	26.7167	229.289	0.1157	49.5	50.8221	95.2698	99.41	574	0.06294	26.7094
1	64PE449_S02C01	2019-02-03T06:13:42	12.8432	-24.0558	11.5845	11.5578	39.749	209.439	207.997	35.0572	26.7172	230.252	0.1163	48.9	50.2061	95.2452	99.41	555.77	0.06294	26.7101
1	64PE449_S02C01	2019-02-03T06:13:42	12.8432	-24.0558	11.5822	11.5553	39.7469	210.446	208.997	35.0566	26.7173	231.112	0.1155	48.427	49.7205	95.2562	99.41	538.44	0.06294	26.7103
1	64PE449_S02C01	2019-02-03T06:13:42	12.8432	-24.0558	11.5712	11.5442	39.7363	211.454	210.001	35.0561	26.719	231.9	0.1206	48.036	49.3191	95.2352	99.41	529.02	0.06294	26.712
1	64PE449_S02C01	2019-02-03T06:13:42	12.8432	-24.0558	11.553	11.5258	39.7177	212.461	210.999	35.0548	26.7214	232.699	0.1207	47.901	49.1806	95.2809	99.41	524.44	0.06294	26.7142
1	64PE449_S02C01	2019-02-03T06:13:42	12.8432	-24.0558	11.5239	11.4968	39.6877	213.468	212	35.0526	26.7251	233.501	0.1179	47.94	49.2208	95.2757	99.41	522.89	0.06294	26.7176
1	64PE449_S02C01	2019-02-03T06:13:42	12.8432	-24.0558	11.5146	11.4873	39.6777	214.476	213.003	35.0512	26.7258	234.28	0.1188	48.014	49.2969	95.2823	99.41	524.03	0.06294	26.7183
1	64PE449_S02C01	2019-02-03T06:13:42	12.8432	-24.0558	11.5058	11.4784	39.6689	215.483	214.001	35.0502	26.7267	235.113	0.1174	48.245	49.5341	95.3064	99.41	527.34	0.06294	26.7192
1	64PE449_S02C01	2019-02-03T06:13:42	12.8432	-24.0558	11.4919	11.4644	39.6547	216.491	215.004	35.0489	26.7282	236.042	0.1214	48.436	49.7302	95.2828	99.41	534.57	0.06294	26.7208
1	64PE449_S02C01	2019-02-03T06:13:42	12.8432	-24.0558	11.4735	11.4459	39.6353	217.498	216.006	35.0468	26.73	237.185	0.1158	48.834	50.139	95.2754	99.41	541.42	0.06294	26.7225
1	64PE449_S02C01	2019-02-03T06:13:42	12.8432	-24.0558	11.4453	11.4176	39.6054	218.506	216.996	35.0436	26.7329	238.685	0.1062	49.098	50.4102	95.3114	99.41	559.7	0.06296	26.7253
1	64PE449_S02C01	2019-02-03T06:13:42	12.8432	-24.0558	11.4092	11.3814	39.5677	219.513	217.995	35.0406	26.7372	239.929	0.1121	49.067	50.3785	95.2902	99.41	577.14	0.06295	26.7292
1	64PE449_S02C01	2019-02-03T06:13:42	12.8432	-24.0558	11.3963	11.3684	39.5536	220.521	218.998	35.0383	26.7378	240.912	0.1111	49.079	50.3909	95.3174	99.41	581.45	0.06297	26.73
1	64PE449_S02C01	2019-02-03T06:13:42	12.8432	-24.0558	11.3841	11.3561	39.5408	221.528	219.998	35.0366	26.7388	241.793	0.1108	49.046	50.357	95.3355	99.41	581.45	0.06295	26.731
1	64PE449_S02C01	2019-02-03T06:13:42	12.8432	-24.0558	11.3763	11.3483	39.5328	222.536	221	35.0355	26.7394	242.63	0.1057	48.867	50.1733	95.3112	99.41	578.22	0.06295	26.7317
1	64PE449_S02C01	2019-02-03T06:13:42	12.8432	-24.0558	11.3716	11.3434	39.5282	223.543	222.003	35.0348	26.7397	243.481	0.1129	48.712	50.0142	95.3173	99.41	572.75	0.06294	26.7322
1	64PE449_S02C01	2019-02-03T06:13:42	12.8432	-24.0558	11.3608	11.3325	39.5174	224.551	223.001	35.0337	26.7409	244.411	0.1159	48.608	49.9075	95.3014	99.41	564.09	0.06294	26.7335
1	64PE449_S02C01	2019-02-03T06:13:42	12.8432	-24.0558	11.3541	11.3257	39.5108	225.558	224	35.0329	26.7415	245.395	0.1083	48.471	49.7668	95.3518	99.41	555.67	0.06295	26.7342
1	64PE449_S02C01	2019-02-03T06:13:42	12.8432	-24.0558	11.3457	11.3172	39.5022	226.566	225.001	35.0317	26.7422	246.42	0.1132	48.418	49.7125	95.331	99.41	545.97	0.06295	26.735
1	64PE449_S02C01	2019-02-03T06:13:42	12.8432	-24.0558	11.338	11.3093	39.4945	227.573	226.001	35.0309	26.743	247.476	0.1156	48.322	49.6139	95.3228	99.41	536.04	0.06295	26.7358
1	64PE449_S02C01	2019-02-03T06:13:42	12.8432	-24.0558	11.3278	11.299	39.484	228.581	226.996	35.0296	26.7439	248.529	0.1179	48.131	49.4179	95.2828	99.4	524.98	0.06295	26.7368
1	64PE449_S02C01	2019-02-03T06:13:42	12.8432	-24.0558	11.3159	11.287	39.4719	229.588	227.998	35.0285	26.7452	249.457	0.1129	47.956	49.2383	95.3407	99.4	518.09	0.06294	26.7381
1	64PE449_S02C01	2019-02-03T06:13:42	12.8432	-24.0558	11.3034	11.2744	39.4589	230.596	228.999	35.027	26.7464	250.334	0.1185	48.006	49.2896	95.3248	99.4	520.78	0.06294	26.7392
1	64PE449_S02C01	2019-02-03T06:13:42	12.8432	-24.0558	11.2983	11.2692	39.4535	231.603	230.001	35.026	26.7466	251.182	0.1279	48.218	49.5073	95.3207	99.41	533.56	0.06295	26.7394
1	64PE449_S02C01	2019-02-03T06:13:42	12.8432	-24.0558	11.2945	11.2652	39.45	232.611	231.002	35.0255	26.7469	252.064	0.126	48.572	49.8708	95.3381	99.41	550.04	0.06294	26.7399
1	64PE449_S02C01	2019-02-03T06:13:42	12.8432	-24.0558	11.2675	11.2381	39.4226	233.618	232.002	35.0239	26.7507	253.025	0.1268	48.805	50.1102	95.3068	99.4	568.01	0.06294	26.7433
1	64PE449_S02C01	2019-02-03T06:13:42	12.8432	-24.0558	11.2158	11.1865	39.3682	234.626	233.001	35.0195	26.7567	254.042	0.1237	48.771	50.0756	95.2787	99.41	584.43	0.06294	26.7486
1	64PE449_S02C01	2019-02-03T06:13:42	12.8432	-24.0558	11.191	11.1616	39.3406	235.634	234.002	35.0153	26.7581	255.144	0.1155	48.665	49.9668	95.3502	99.4	596.61	0.06294	26.7498
1	64PE449_S02C01	2019-02-03T06:13:42	12.8432	-24.0558	11.1838	11.1542	39.3328	236.641	234.998	35.0136	26.758	256.435	0.1171	48.861	50.168	95.3711	99.41	595.53	0.06294	26.7501
1	64PE449_S02C01	2019-02-03T06:13:42	12.8432	-24.0558	11.1828	11.1531	39.3322	237.649	235.996	35.013	26.7578	257.622	0.1189	48.979	50.2892	95.3362	99.41	579.98	0.06294	26.7502
1	64PE449_S02C01	2019-02-03T06:13:42	12.8432	-24.0558	11.1817	11.1519	39.3316	238.656	236.999	35.0127	26.7578	258.59	0.1116	49.155	50.4699	95.3647	99.41	564.21	0.06294	26.7504
1	64PE449_S02C01	2019-02-03T06:13:42	12.8432	-24.0558	11.1794	11.1494	39.3294	239.664	237.997	35.0121	26.7578	259.458	0.1064	49.361	50.6814	95.3465	99.4	551.88	0.06294	26.7506
1	64PE449_S02C01	2019-02-03T06:13:42	12.8432	-24.0558	11.1782	11.1482	39.3287	240.671	238.999	35.0118	26.7577	260.258	0.1038	49.383	50.704	95.364	99.41	543.43	0.06294	26.7507
1	64PE449_S02C01	2019-02-03T06:13:42	12.8432	-24.0558	11.1769	11.1465	39.3279	241.679	240.001	35.0118	26.7581	261.035	0.1024	49.259	50.5767	95.3587	99.41	536.34	0.06294	26.7509
1	64PE449_S02C01	2019-02-03T06:13:42	12.8432	-24.0558	11.1011	11.0711	39.2505	242.687	241.004	35.0079	26.7688	261.845	0.1056	49.026	50.338	95.3492	99.41	531.7	0.06294	26.7606
1	64PE449_S02C01	2019-02-03T06:13:42	12.8432	-24.0558	11.0625	11.0322	39.2071	243.694	242.004	35.0017	26.771	262.769	0.1092	48.928	50.2374	95.3643	99.41	534.16	0.06294	26.7622
1	64PE449_S02C01	2019-02-03T06:13:42	12.8432	-24.0558	11.0276	10.9973	39.1702	244.702	243.004	34.998	26.7745	263.875	0.1088	48.755	50.06	95.3927	99.41	548.35	0.06294	26.7655
1	64PE449_S02C01	2019-02-03T06:13:42	12.8432	-24.0558	11.0127	10.9823	39.1541	245.709	243.996	34.9952	26.775	265.239	0.1049	48.407	49.7027	95.435	99.41	569.98	0.06294	26.7663
1	64PE449_S02C01	2019-02-03T06:13:42	12.8432	-24.0558	11.0072	10.9767	39.1488	246.717	244.996	34.9943	26.7753	266.358	0.1011	48.085	49.3721	95.4042	99.41	580.85	0.06294	26.767
1	64PE449_S02C01	2019-02-03T06:13:42	12.8432	-24.0558	11.0034	10.9728	39.1455	247.724	245.996	34.9937	26.7756	267.268	0.0942	47.693	48.9696	95.4051	99.41	580.76	0.06294	26.7675
1	64PE449_S02C01	2019-02-03T06:13:42	12.8432	-24.0558	11.0001	10.9693	39.1426	248.732	247.001	34.9933	26.7759	268.081	0.0922	47.223	48.4871	95.444	99.4	575.81	0.06294	26.768
1	64PE449_S02C01	2019-02-03T06:13:42	12.8432	-24.0558	10.9976	10.9668	39.1408	249.74	248.002	34.9931	26.7762	268.916	0.1013	46.336	47.5763	95.4339	99.41	571.41	0.06294	26.7685
1	64PE449_S02C01	2019-02-03T06:13:42	12.8432	-24.0558	10.9957	10.9648	39.1394	250.747	249.001	34.9928	26.7764	269.832	0.1043	45.179	46.3884	95.3623	99.41	567.9	0.06294	26.7688
1	64PE449_S02C01	2019-02-03T06:13:42	12.8432	-24.0558	10.9813	10.9501	39.1256	251.755	250.002	34.9925	26.7787	270.798	0.1089	45.208	46.4183	95.3066	99.41	561.48	0.06294	26.7711
1	64PE449_S02C01	2019-02-03T06:13:42	12.8432	-24.0558	10.9272	10.8961	39.0702	252.763	251.001	34.9893	26.786	271.809	0.1174	46.334	47.5747	95.4263	99.4	554.17	0.06294	26.7776
1	64PE449_S02C01	2019-02-03T06:13:42	12.8432	-24.0558	10.8848	10.8537	39.0241	253.77	252.001	34.9836	26.7892	272.853	0.1117	47.478	48.7495	95.3601	99.4	552.17	0.06294	26.7803
1	64PE449_S02C01	2019-02-03T06:13:42	12.8432	-24.0558	10.8655	10.8342	39.0023	254.778	253.001	34.9797	26.7897	273.956	0.1136	48.367	49.6623	95.491	99.41	554.76	0.06294	26.7809
1	64PE449_S02C01	2019-02-03T06:13:42	12.8432	-24.0558	10.8439	10.8126	38.9791	255.786	253.996	34.9766	26.7911	275.069	0.1072	48.954	50.2651	95.4743	99.4	554.51	0.06294	26.7823
1	64PE449_S02C01	2019-02-03T06:13:42	12.8432	-24.0558	10.8254	10.794	38.9586	256.793	254.999	34.9732	26.7918	276.06	0.1037	49.436	50.76	95.4914	99.4	552.7	0.06294	26.7831
1	64PE449_S02C01	2019-02-03T06:13:42	12.8432	-24.0558	10.8171	10.7856	38.9506	257.801	256	34.9723	26.7927	277.004	0.1049	50.292	51.639	95.4877	99.4	552.9	0.06294	26.7841
1	64PE449_S02C01	2019-02-03T06:13:42	12.8432	-24.0558	10.8106	10.779	38.9447	258.809	256.998	34.9719	26.7935	277.925	0.1035	51.599	52.9811	95.4989	99.4	553.15	0.06294	26.7852
1	64PE449_S02C01	2019-02-03T06:13:42	12.8432	-24.0558	10.7839	10.7522	38.917	259.816	257.998	34.9695	26.7965	278.805	0.1024	53.269	54.696	95.4795	99.4	553.58	0.06294	26.7878
1	64PE449_S02C01	2019-02-03T06:13:42	12.8432	-24.0558	10.7378	10.706	38.8664	260.824	258.999	34.9631	26.7997	279.656	0.105	56.4	57.911	95.5121	99.41	552.98	0.06294	26.7905
1	64PE449_S02C01	2019-02-03T06:13:42	12.8432	-24.0558	10.6844	10.6527	38.8099	261.832	260.003	34.9578	26.8051	280.491	0.1031	60.898	62.5298	95.4996	99.4	554.31	0.06294	26.7952
1	64PE449_S02C01	2019-02-03T06:13:42	12.8432	-24.0558	10.648	10.6161	38.7688	262.839	261.002	34.9512	26.8064	281.408	0.1026	65.886	67.6515	95.4761	99.4	557.97	0.06294	26.7962
1	64PE449_S02C01	2019-02-03T06:13:42	12.8432	-24.0558	10.591	10.5592	38.7067	263.847	262.003	34.9434	26.8104	282.419	0.1025	69.635	71.5012	95.538	99.41	563.97	0.06294	26.7997
1	64PE449_S02C01	2019-02-03T06:13:42	12.8432	-24.0558	10.5173	10.4855	38.6243	264.855	263.002	34.9314	26.8141	283.565	0.1047	73.921	75.9023	95.5424	99.41	571.01	0.06294	26.8027
1	64PE449_S02C01	2019-02-03T06:13:42	12.8432	-24.0558	10.4605	10.4286	38.5593	265.862	263.997	34.92	26.8152	284.853	0.1001	78.768	80.8793	95.609	99.41	576.6	0.06294	26.8035
1	64PE449_S02C01	2019-02-03T06:13:42	12.8432	-24.0558	10.4108	10.3789	38.5065	266.87	264.995	34.914	26.8192	285.966	0.0982	80.724	82.888	95.6541	99.41	576.6	0.06294	26.8073
1	64PE449_S02C01	2019-02-03T06:13:42	12.8432	-24.0558	10.2994	10.2678	38.387	267.878	266.001	34.9011	26.8286	286.899	0.0992	81.925	84.1219	95.6943	99.41	573.12	0.06294	26.8154
1	64PE449_S02C01	2019-02-03T06:13:42	12.8432	-24.0558	10.2776	10.2458	38.3612	268.885	267	34.895	26.8276	287.78	0.0983	82.84	85.0613	95.7351	99.42	569.18	0.06294	26.8148
1	64PE449_S02C01	2019-02-03T06:13:42	12.8432	-24.0558	10.2544	10.2225	38.3361	269.893	268.002	34.8907	26.8283	288.689	0.0959	83.493	85.7319	95.7531	99.44	562.34	0.06294	26.8159
1	64PE449_S02C01	2019-02-03T06:13:42	12.8432	-24.0558	10.2198	10.1879	38.2985	270.901	269.001	34.8851	26.8299	289.681	0.0856	84.212	86.4704	95.7784	99.44	554.58	0.06294	26.8177
1	64PE449_S02C01	2019-02-03T06:13:42	12.8432	-24.0558	10.2014	10.1694	38.2782	271.909	269.998	34.881	26.8299	290.717	0.0858	85.265	87.5517	95.7841	99.45	549.02	0.06294	26.8182
1	64PE449_S02C01	2019-02-03T06:13:42	12.8432	-24.0558	10.1857	10.1536	38.2619	272.916	270.997	34.8784	26.8307	291.696	0.0887	86.379	88.6956	95.815	99.45	548.87	0.06294	26.8194
1	64PE449_S02C01	2019-02-03T06:13:42	12.8432	-24.0558	10.1633	10.1312	38.2381	273.924	271.999	34.875	26.8319	292.587	0.0854	86.778	89.1055	95.8349	99.45	550.29	0.06294	26.8208
1	64PE449_S02C01	2019-02-03T06:13:42	12.8432	-24.0558	10.133	10.1007	38.2066	274.932	273.003	34.8717	26.8345	293.452	0.0868	86.612	88.9352	95.8265	99.46	551.39	0.06294	26.8234
1	64PE449_S02C01	2019-02-03T06:13:42	12.8432	-24.0558	10.0752	10.043	38.1453	275.94	274.003	34.865	26.8392	294.407	0.0847	86.021	88.3288	95.8161	99.46	556.97	0.06294	26.8278
1	64PE449_S02C01	2019-02-03T06:13:42	12.8432	-24.0558	10.0585	10.0261	38.1264	276.947	275.001	34.8608	26.8388	295.46	0.0798	84.628	86.8984	95.8377	99.47	565.16	0.06294	26.8277
1	64PE449_S02C01	2019-02-03T06:13:42	12.8432	-24.0558	10.0517	10.0192	38.1197	277.955	276	34.8591	26.8387	296.608	0.0842	82.498	84.7113	95.8463	99.47	568.89	0.06294	26.8283
1	64PE449_S02C01	2019-02-03T06:13:42	12.8432	-24.0558	10.0502	10.0177	38.1192	278.963	276.998	34.8587	26.8386	297.747	0.0826	80.853	83.0222	95.8492	99.48	567.44	0.06294	26.8288
1	64PE449_S02C01	2019-02-03T06:13:42	12.8432	-24.0558	10.0479	10.0152	38.1195	279.971	277.998	34.8601	26.8401	298.769	0.0879	79.797	81.938	95.874	99.48	570.31	0.06294	26.8309
1	64PE449_S02C01	2019-02-03T06:13:42	12.8432	-24.0558	10.0431	10.0103	38.1164	280.978	278.999	34.8606	26.8414	299.723	0.0887	78.607	80.7162	95.8622	99.48	573.7	0.06294	26.8325
1	64PE449_S02C01	2019-02-03T06:13:42	12.8432	-24.0558	10.0407	10.0078	38.115	281.986	279.999	34.8606	26.8417	300.618	0.0929	77.476	79.5549	95.8908	99.48	572.88	0.06294	26.8332
1	64PE449_S02C01	2019-02-03T06:13:42	12.8432	-24.0558	10.0384	10.0054	38.1138	282.994	281.003	34.8608	26.8423	301.485	0.0915	76.146	78.1893	95.8476	99.47	567.94	0.06294	26.8341
1	64PE449_S02C01	2019-02-03T06:13:42	12.8432	-24.0558	10.0307	9.9976	38.1082	284.002	282.002	34.8617	26.8444	302.435	0.0841	73.871	75.8534	95.8926	99.47	561.29	0.06294	26.8363
1	64PE449_S02C01	2019-02-03T06:13:42	12.8432	-24.0558	10.0143	9.9811	38.0922	285.01	283.001	34.8608	26.8465	303.486	0.0885	70.92	72.8234	95.8799	99.47	556.98	0.06294	26.8383
1	64PE449_S02C01	2019-02-03T06:13:42	12.8432	-24.0558	10.001	9.9677	38.0805	286.017	284	34.8611	26.849	304.628	0.086	68.672	70.5152	95.8762	99.46	563.3	0.06294	26.841
1	64PE449_S02C01	2019-02-03T06:13:42	12.8432	-24.0558	9.984	9.9506	38.0662	287.025	284.996	34.8624	26.8529	305.725	0.0859	66.233	68.011	95.9051	99.46	571.26	0.06294	26.8449
1	64PE449_S02C01	2019-02-03T06:13:42	12.8432	-24.0558	9.9802	9.9467	38.0632	288.033	285.997	34.8622	26.8535	306.647	0.0932	66.535	68.3212	95.8817	99.45	567.32	0.06294	26.8456
1	64PE449_S02C01	2019-02-03T06:13:42	12.8432	-24.0558	9.9787	9.9452	38.0624	289.041	286.999	34.8621	26.8537	307.47	0.0924	69.503	71.3689	95.8545	99.45	557	0.06294	26.846
1	64PE449_S02C01	2019-02-03T06:13:42	12.8432	-24.0558	9.985	9.9512	38.0721	290.049	288.004	34.8652	26.8551	308.265	0.0847	72.125	74.0614	95.9089	99.44	550.21	0.06294	26.8477
1	64PE449_S02C01	2019-02-03T06:13:42	12.8432	-24.0558	9.9712	9.9373	38.0585	291.056	289.004	34.8643	26.8567	309.151	0.0829	73.166	75.1304	95.8678	99.44	546.84	0.06294	26.8492
1	64PE449_S02C01	2019-02-03T06:13:42	12.8432	-24.0558	9.9089	9.8752	37.9917	292.064	290.004	34.8567	26.8614	310.201	0.094	72.457	74.4027	95.8872	99.44	550.62	0.06294	26.8529
1	64PE449_S02C01	2019-02-03T06:13:42	12.8432	-24.0558	9.8655	9.8317	37.9447	293.072	290.998	34.8507	26.864	311.46	0.1045	70.406	72.2968	95.8837	99.44	564.35	0.06294	26.8551
1	64PE449_S02C01	2019-02-03T06:13:42	12.8432	-24.0558	9.8314	9.7975	37.9095	294.08	291.997	34.8473	26.8672	312.614	0.0962	65.783	67.5498	95.87	99.44	571.55	0.06294	26.858
1	64PE449_S02C01	2019-02-03T06:13:42	12.8432	-24.0558	9.8199	9.7859	37.8982	295.088	292.999	34.8461	26.8682	313.594	0.0924	60.949	62.586	95.7865	99.44	572.49	0.06294	26.8592
1	64PE449_S02C01	2019-02-03T06:13:42	12.8432	-24.0558	9.814	9.7799	37.8938	296.096	294.002	34.8465	26.8695	314.59	0.0882	56.679	58.2014	95.902	99.44	576.13	0.06294	26.8608
1	64PE449_S02C01	2019-02-03T06:13:42	12.8432	-24.0558	9.8108	9.7766	37.8983	297.103	294.996	34.8532	26.8753	315.634	0.0862	53.347	54.7803	95.9062	99.44	576.16	0.06294	26.8669
1	64PE449_S02C01	2019-02-03T06:13:42	12.8432	-24.0558	9.8025	9.7682	37.8924	298.111	296	34.8545	26.8778	316.571	0.0907	52.396	53.8039	95.8912	99.44	574.07	0.06294	26.8695
1	64PE449_S02C01	2019-02-03T06:13:42	12.8432	-24.0558	9.7824	9.748	37.8778	299.119	296.997	34.8588	26.8845	317.448	0.0989	51.91	53.3051	95.8447	99.44	571.18	0.06294	26.8761
1	64PE449_S02C01	2019-02-03T06:13:42	12.8432	-24.0558	9.7751	9.7406	37.8715	300.127	298.004	34.8587	26.8856	318.294	0.1069	51.277	52.6552	95.8136	99.43	564.6	0.06294	26.8774
1	64PE449_S02C01	2019-02-03T06:13:42	12.8432	-24.0558	9.7749	9.7403	37.8717	301.135	299.002	34.8583	26.8854	319.195	0.1088	50.624	51.9846	95.8022	99.42	560.46	0.06294	26.8774
1	64PE449_S02C01	2019-02-03T06:13:42	12.8432	-24.0558	9.7766	9.7419	37.875	302.143	300	34.8592	26.8858	320.16	0.1052	50.421	51.7762	95.8055	99.41	557.11	0.06294	26.8781
1	64PE449_S02C01	2019-02-03T06:13:42	12.8432	-24.0558	9.7798	9.745	37.8799	303.151	301.001	34.8601	26.886	321.15	0.0965	50.458	51.8142	95.7666	99.41	551.89	0.06294	26.8786
1	64PE449_S02C01	2019-02-03T06:13:42	12.8432	-24.0558	9.7783	9.7433	37.8796	304.159	302.001	34.8607	26.8868	322.18	0.0995	50.506	51.8636	95.7551	99.41	548.48	0.06294	26.8795
1	64PE449_S02C01	2019-02-03T06:13:42	12.8432	-24.0558	9.7693	9.7343	37.8708	305.166	303.003	34.8598	26.8876	323.284	0.0964	50.59	51.9499	95.7419	99.41	552.67	0.06294	26.8803
1	64PE449_S02C01	2019-02-03T06:13:42	12.8432	-24.0558	9.7643	9.7292	37.8659	306.174	303.998	34.8591	26.8879	324.497	0.0976	50.437	51.7928	95.7407	99.41	565.72	0.06294	26.8807
1	64PE449_S02C01	2019-02-03T06:13:42	12.8432	-24.0558	9.7589	9.7236	37.8612	307.182	304.996	34.8589	26.8886	325.599	0.1023	50.447	51.8031	95.7113	99.41	579.1	0.06294	26.8815
1	64PE449_S02C01	2019-02-03T06:13:42	12.8432	-24.0558	9.7419	9.7065	37.8438	308.19	305.998	34.8574	26.8903	326.537	0.0988	50.475	51.8319	95.707	99.41	581.92	0.06294	26.883
1	64PE449_S02C01	2019-02-03T06:13:42	12.8432	-24.0558	9.7301	9.6947	37.832	309.198	307.001	34.8563	26.8915	327.41	0.1013	50.362	51.7159	95.7195	99.41	583.19	0.06294	26.8841
1	64PE449_S02C01	2019-02-03T06:13:42	12.8432	-24.0558	9.7223	9.6869	37.8243	310.206	308.003	34.8553	26.8921	328.325	0.1048	50.251	51.602	95.6501	99.41	579.31	0.06294	26.8846
1	64PE449_S02C01	2019-02-03T06:13:42	12.8432	-24.0558	9.7177	9.6821	37.8198	311.214	308.999	34.8546	26.8923	329.329	0.1073	50.275	51.6266	95.7185	99.41	570.89	0.06294	26.8849
1	64PE449_S02C01	2019-02-03T06:13:42	12.8432	-24.0558	9.7136	9.6779	37.8161	312.222	309.998	34.8542	26.8927	330.317	0.106	50.193	51.5425	95.733	99.41	563.4	0.06294	26.8854
1	64PE449_S02C01	2019-02-03T06:13:42	12.8432	-24.0558	9.6943	9.6585	37.7971	313.23	311.001	34.8533	26.8952	331.226	0.0992	50.229	51.5795	95.7249	99.4	560.43	0.06294	26.8877
1	64PE449_S02C01	2019-02-03T06:13:42	12.8432	-24.0558	9.6693	9.6334	37.7712	314.238	312.001	34.8508	26.8975	332.14	0.098	50.377	51.7316	95.7316	99.4	557.2	0.06294	26.8896
1	64PE449_S02C01	2019-02-03T06:13:42	12.8432	-24.0558	9.6637	9.6277	37.7654	315.246	313.001	34.8496	26.8974	333.123	0.0996	50.271	51.6228	95.7333	99.41	554.2	0.06294	26.8897
1	64PE449_S02C01	2019-02-03T06:13:42	12.8432	-24.0558	9.6569	9.6208	37.7587	316.253	314	34.8487	26.8979	334.144	0.0996	50.165	51.5139	95.732	99.41	550.76	0.06294	26.8902
1	64PE449_S02C01	2019-02-03T06:13:42	12.8432	-24.0558	9.6538	9.6176	37.7558	317.261	315.001	34.848	26.8979	335.172	0.1057	50.258	51.6095	95.7495	99.4	550.25	0.06294	26.8904
1	64PE449_S02C01	2019-02-03T06:13:42	12.8432	-24.0558	9.6355	9.5993	37.7382	318.269	316	34.8474	26.9005	336.233	0.1076	50.283	51.6353	95.6037	99.4	555.22	0.06294	26.8928
1	64PE449_S02C01	2019-02-03T06:13:42	12.8432	-24.0558	9.6125	9.5762	37.7142	319.277	316.999	34.8448	26.9024	337.318	0.1019	50.37	51.7247	95.691	99.41	563.13	0.06294	26.8944
1	64PE449_S02C01	2019-02-03T06:13:42	12.8432	-24.0558	9.6033	9.5669	37.7046	320.285	317.998	34.8433	26.9027	338.375	0.1025	50.373	51.7278	95.7004	99.41	570.67	0.06294	26.8948
1	64PE449_S02C01	2019-02-03T06:13:42	12.8432	-24.0558	9.5962	9.5597	37.6978	321.293	318.999	34.8425	26.9033	339.345	0.1035	50.347	51.7011	95.6946	99.4	572.5	0.06294	26.8954
1	64PE449_S02C01	2019-02-03T06:13:42	12.8432	-24.0558	9.5886	9.552	37.6901	322.301	319.999	34.8414	26.9037	340.264	0.1062	50.244	51.5954	95.6799	99.41	571.51	0.06294	26.8959
1	64PE449_S02C01	2019-02-03T06:13:42	12.8432	-24.0558	9.578	9.5414	37.6798	323.309	321.001	34.8406	26.9048	341.168	0.1031	50.185	51.5348	95.7248	99.41	571.1	0.06294	26.897
1	64PE449_S02C01	2019-02-03T06:13:42	12.8432	-24.0558	9.5717	9.535	37.6735	324.317	321.999	34.8396	26.9051	342.075	0.1026	50.272	51.6242	95.6521	99.4	570.86	0.06294	26.8974
1	64PE449_S02C01	2019-02-03T06:13:42	12.8432	-24.0558	9.5615	9.5245	37.6637	325.325	323.001	34.8391	26.9065	342.981	0.0998	50.298	51.651	95.7261	99.41	570.74	0.06294	26.8987
1	64PE449_S02C01	2019-02-03T06:13:42	12.8432	-24.0558	9.5394	9.5024	37.6412	326.333	324.003	34.8371	26.9086	343.913	0.1063	50.359	51.7137	95.7112	99.41	569.3	0.06294	26.9005
1	64PE449_S02C01	2019-02-03T06:13:42	12.8432	-24.0558	9.5231	9.4861	37.6247	327.341	325	34.8355	26.91	344.921	0.1116	50.535	51.8945	95.6851	99.41	564.77	0.06294	26.9019
1	64PE449_S02C01	2019-02-03T06:13:42	12.8432	-24.0558	9.5169	9.4798	37.6183	328.349	326.001	34.8343	26.9101	345.99	0.1132	50.31	51.6634	95.7008	99.41	557.17	0.06294	26.9021
1	64PE449_S02C01	2019-02-03T06:13:42	12.8432	-24.0558	9.5108	9.4736	37.6124	329.357	327.001	34.8334	26.9104	347.111	0.1021	50.196	51.5464	95.6511	99.4	556.56	0.06294	26.9026
1	64PE449_S02C01	2019-02-03T06:13:42	12.8432	-24.0558	9.5034	9.4661	37.6054	330.365	327.996	34.8328	26.9112	348.212	0.0999	50.137	51.4859	95.6926	99.4	560.22	0.06294	26.9034
1	64PE449_S02C01	2019-02-03T06:13:42	12.8432	-24.0558	9.4908	9.4534	37.5932	331.373	328.999	34.8321	26.9128	349.186	0.1117	50.065	51.412	95.7087	99.41	562.34	0.06294	26.9049
1	64PE449_S02C01	2019-02-03T06:13:42	12.8432	-24.0558	9.4688	9.4313	37.571	332.381	330	34.8303	26.915	350.096	0.1361	50.066	51.4131	95.7061	99.4	564.87	0.06294	26.9069
1	64PE449_S02C01	2019-02-03T06:13:42	12.8432	-24.0558	9.4625	9.4249	37.5646	333.389	331	34.8292	26.9152	350.99	0.1165	50.147	51.4963	95.6689	99.41	566.3	0.06294	26.9072
1	64PE449_S02C01	2019-02-03T06:13:42	12.8432	-24.0558	9.4488	9.4112	37.5512	334.397	332	34.8282	26.9166	351.891	0.0989	50.15	51.4995	95.667	99.4	563.15	0.06294	26.9086
1	64PE449_S02C01	2019-02-03T06:13:42	12.8432	-24.0558	9.4434	9.4056	37.5457	335.405	333.003	34.8271	26.9168	352.809	0.0986	50.09	51.4379	95.6482	99.41	561.18	0.06294	26.9088
1	64PE449_S02C01	2019-02-03T06:13:42	12.8432	-24.0558	9.4407	9.4028	37.5433	336.413	334.001	34.8266	26.9169	353.806	0.0984	50.049	51.3958	95.646	99.41	562.55	0.06294	26.909
1	64PE449_S02C01	2019-02-03T06:13:42	12.8432	-24.0558	9.4398	9.4018	37.5429	337.421	335.001	34.8263	26.9167	354.881	0.1046	50.016	51.3619	95.63	99.4	568.5	0.06294	26.9091
1	64PE449_S02C01	2019-02-03T06:13:42	12.8432	-24.0558	9.4362	9.3982	37.5398	338.43	335.999	34.8259	26.9171	355.996	0.1018	49.897	51.2397	95.6436	99.4	572.93	0.06294	26.9095
1	64PE449_S02C01	2019-02-03T06:13:42	12.8432	-24.0558	9.4269	9.3887	37.5308	339.437	336.997	34.8252	26.9181	357.052	0.1007	49.41	50.7396	95.6359	99.41	576.15	0.06294	26.9105
1	64PE449_S02C01	2019-02-03T06:13:42	12.8432	-24.0558	9.4185	9.3803	37.5225	340.446	337.999	34.8244	26.9188	358	0.099	49.202	50.5261	95.6371	99.41	576.35	0.06294	26.9112
1	64PE449_S02C01	2019-02-03T06:13:42	12.8432	-24.0558	9.4066	9.3682	37.5112	341.454	339	34.8239	26.9204	358.892	0.0997	49.15	50.4728	95.6296	99.41	572.57	0.06294	26.9127
1	64PE449_S02C01	2019-02-03T06:13:42	12.8432	-24.0558	9.3878	9.3494	37.4925	342.462	340.004	34.8225	26.9224	359.797	0.1083	49.175	50.4985	95.6326	99.41	566.46	0.06294	26.9145
1	64PE449_S02C01	2019-02-03T06:13:42	12.8432	-24.0558	9.383	9.3445	37.4878	343.47	341.001	34.8218	26.9227	360.818	0.1073	49.039	50.3589	95.6162	99.41	557.86	0.06294	26.9148
1	64PE449_S02C01	2019-02-03T06:13:42	12.8432	-24.0558	9.3813	9.3427	37.4864	344.478	342	34.8213	26.9226	361.917	0.097	48.953	50.2706	95.5977	99.4	554.52	0.06294	26.9149
1	64PE449_S02C01	2019-02-03T06:13:42	12.8432	-24.0558	9.3778	9.3391	37.4836	345.486	342.997	34.8212	26.9231	363	0.099	48.772	50.0847	95.596	99.4	556.98	0.06294	26.9155
1	64PE449_S02C01	2019-02-03T06:13:42	12.8432	-24.0558	9.3651	9.3263	37.4714	346.494	343.998	34.8205	26.9246	363.959	0.1011	48.639	49.9482	95.5747	99.4	561.49	0.06294	26.917
1	64PE449_S02C01	2019-02-03T06:13:42	12.8432	-24.0558	9.3535	9.3146	37.46	347.502	345	34.8196	26.9259	364.844	0.1058	48.488	49.7932	95.5547	99.41	565.2	0.06294	26.9181
1	64PE449_S02C01	2019-02-03T06:13:42	12.8432	-24.0558	9.3464	9.3073	37.4529	348.51	345.999	34.8188	26.9264	365.705	0.1108	48.519	49.8251	95.5696	99.4	566.44	0.06294	26.9186
1	64PE449_S02C01	2019-02-03T06:13:42	12.8432	-24.0558	9.3399	9.3008	37.4467	349.518	347.005	34.8181	26.9269	366.575	0.1085	48.672	49.9822	95.5497	99.41	563.92	0.06294	26.9191
1	64PE449_S02C01	2019-02-03T06:13:42	12.8432	-24.0558	9.3374	9.2982	37.4445	350.527	348.001	34.8176	26.927	367.544	0.0998	48.766	50.0787	95.5305	99.4	560.06	0.06294	26.9193
1	64PE449_S02C01	2019-02-03T06:13:42	12.8432	-24.0558	9.3333	9.294	37.4406	351.535	349.002	34.817	26.9272	368.631	0.1019	48.815	50.1291	95.5164	99.41	561.48	0.06294	26.9196
1	64PE449_S02C01	2019-02-03T06:13:42	12.8432	-24.0558	9.3304	9.2911	37.4381	352.543	349.999	34.8166	26.9273	369.813	0.1075	48.848	50.163	95.5176	99.41	572.06	0.06294	26.9198
1	64PE449_S02C01	2019-02-03T06:13:42	12.8432	-24.0558	9.3265	9.287	37.4345	353.551	350.998	34.8161	26.9276	370.932	0.1047	48.85	50.1651	95.4998	99.4	583.47	0.06294	26.9202
1	64PE449_S02C01	2019-02-03T06:13:42	12.8432	-24.0558	9.3216	9.282	37.4298	354.559	351.999	34.8155	26.928	371.927	0.1027	48.784	50.0973	95.5105	99.4	587.93	0.06294	26.9205
1	64PE449_S02C01	2019-02-03T06:13:42	12.8432	-24.0558	9.3119	9.2722	37.4204	355.567	352.997	34.8149	26.9291	372.853	0.1057	48.611	49.9197	95.5271	99.4	587.69	0.06294	26.9216
1	64PE449_S02C01	2019-02-03T06:13:42	12.8432	-24.0558	9.3023	9.2625	37.4108	356.575	354	34.8138	26.9298	373.735	0.1063	48.549	49.856	95.5203	99.4	584.52	0.06294	26.9222
1	64PE449_S02C01	2019-02-03T06:13:42	12.8432	-24.0558	9.2973	9.2574	37.4062	357.583	355.004	34.8134	26.9304	374.605	0.1093	48.691	50.0019	95.5239	99.4	574.24	0.06294	26.9227
1	64PE449_S02C01	2019-02-03T06:13:42	12.8432	-24.0558	9.2929	9.2529	37.4021	358.592	356.002	34.8129	26.9307	375.573	0.1072	48.755	50.0676	95.5091	99.41	561.49	0.06294	26.9231
1	64PE449_S02C01	2019-02-03T06:13:42	12.8432	-24.0558	9.2895	9.2494	37.3989	359.6	357.001	34.8124	26.9309	376.672	0.114	48.753	50.0656	95.4838	99.41	554.78	0.06294	26.9234
1	64PE449_S02C01	2019-02-03T06:13:42	12.8432	-24.0558	9.2829	9.2427	37.3928	360.608	357.996	34.8119	26.9316	377.799	0.1052	48.792	50.1057	95.4937	99.41	553.16	0.06294	26.9241
1	64PE449_S02C01	2019-02-03T06:13:42	12.8432	-24.0558	9.2756	9.2353	37.3857	361.616	358.998	34.8112	26.9323	378.784	0.0897	48.847	50.1622	95.4909	99.4	554.51	0.06294	26.9247
1	64PE449_S02C01	2019-02-03T06:13:42	12.8432	-24.0558	9.2699	9.2295	37.3801	362.624	359.999	34.8105	26.9326	379.695	0.0864	48.991	50.3101	95.4836	99.4	555.85	0.06294	26.9251
1	64PE449_S02C01	2019-02-03T06:13:42	12.8432	-24.0558	9.2668	9.2262	37.3773	363.632	361.001	34.8101	26.9329	380.562	0.092	49.064	50.3851	95.469	99.4	558.98	0.06294	26.9253
1	64PE449_S02C01	2019-02-03T06:13:42	12.8432	-24.0558	9.2605	9.2199	37.3713	364.641	362.002	34.8095	26.9334	381.442	0.0966	49.162	50.4857	95.427	99.41	562.5	0.06294	26.9258
1	64PE449_S02C01	2019-02-03T06:13:42	12.8432	-24.0558	9.2553	9.2146	37.3662	365.649	363.001	34.8089	26.9338	382.389	0.0982	49.231	50.5566	95.4516	99.4	569.26	0.06294	26.9262
1	64PE449_S02C01	2019-02-03T06:13:42	12.8432	-24.0558	9.2518	9.211	37.3629	366.657	364	34.8083	26.9339	383.365	0.1056	49.235	50.5607	95.486	99.4	577.48	0.06294	26.9264
1	64PE449_S02C01	2019-02-03T06:13:42	12.8432	-24.0558	9.25	9.209	37.3612	367.665	365.002	34.8078	26.9338	384.389	0.1055	49.301	50.6285	95.5016	99.4	582.34	0.06294	26.9263
1	64PE449_S02C01	2019-02-03T06:13:42	12.8432	-24.0558	9.2492	9.2082	37.3608	368.673	366.002	34.8074	26.9337	385.499	0.1061	49.131	50.4539	95.4961	99.4	582.5	0.06294	26.9263
1	64PE449_S02C01	2019-02-03T06:13:42	12.8432	-24.0558	9.2478	9.2066	37.3599	369.682	367	34.8073	26.9339	386.732	0.1013	49.162	50.4858	95.4936	99.4	578.07	0.06294	26.9265
1	64PE449_S02C01	2019-02-03T06:13:42	12.8432	-24.0558	9.2453	9.2041	37.3578	370.69	367.997	34.807	26.9341	387.93	0.1082	49.175	50.4991	95.5031	99.4	580.92	0.06294	26.9267
1	64PE449_S02C01	2019-02-03T06:13:42	12.8432	-24.0558	9.2432	9.2018	37.356	371.698	368.998	34.8067	26.9342	388.948	0.1068	49.361	50.6901	95.4979	99.41	584.66	0.06294	26.9269
1	64PE449_S02C01	2019-02-03T06:13:42	12.8432	-24.0558	9.2412	9.1997	37.3544	372.706	369.999	34.8064	26.9343	389.877	0.1034	49.461	50.7928	95.5004	99.41	584.75	0.06294	26.927
1	64PE449_S02C01	2019-02-03T06:13:42	12.8432	-24.0558	9.2402	9.1986	37.3537	373.714	370.999	34.8062	26.9343	390.749	0.1079	49.588	50.9233	95.4756	99.4	580.78	0.06294	26.927
1	64PE449_S02C01	2019-02-03T06:13:42	12.8432	-24.0558	9.235	9.1933	37.3489	374.723	372	34.8059	26.935	391.588	0.1044	49.837	51.179	95.4919	99.4	574.26	0.06294	26.9276
1	64PE449_S02C01	2019-02-03T06:13:42	12.8432	-24.0558	9.2294	9.1876	37.3432	375.731	372.999	34.8051	26.9352	392.408	0.1009	49.816	51.1574	95.4522	99.4	565.6	0.06294	26.9278
1	64PE449_S02C01	2019-02-03T06:13:42	12.8432	-24.0558	9.2269	9.185	37.3411	376.739	374.003	34.8047	26.9354	393.225	0.0979	49.862	51.2047	95.4071	99.4	555.54	0.06294	26.928
1	64PE449_S02C01	2019-02-03T06:13:42	12.8432	-24.0558	9.223	9.181	37.3372	377.747	375.003	34.8041	26.9356	394.121	0.0946	49.912	51.256	95.4839	99.4	548.74	0.06294	26.9281
1	64PE449_S02C01	2019-02-03T06:13:42	12.8432	-24.0558	9.2199	9.1778	37.3342	378.756	376.003	34.8035	26.9356	395.114	0.0926	49.798	51.139	95.5176	99.41	548.93	0.06294	26.9281
1	64PE449_S02C01	2019-02-03T06:13:42	12.8432	-24.0558	9.2169	9.1747	37.3315	379.764	377.001	34.8031	26.9358	396.208	0.0997	49.827	51.1688	95.5191	99.4	553.95	0.06294	26.9283
1	64PE449_S02C01	2019-02-03T06:13:42	12.8432	-24.0558	9.2131	9.1708	37.3282	380.772	378.001	34.8029	26.9362	397.376	0.1015	50.023	51.3701	95.5075	99.4	564.17	0.06294	26.9288
1	64PE449_S02C01	2019-02-03T06:13:42	12.8432	-24.0558	9.2098	9.1674	37.3251	381.78	379.001	34.8024	26.9364	398.599	0.1014	50.003	51.3495	95.5109	99.4	576.45	0.06294	26.9289
1	64PE449_S02C01	2019-02-03T06:13:42	12.8432	-24.0558	9.2083	9.1657	37.3239	382.789	379.996	34.8022	26.9365	399.834	0.1019	50.315	51.6699	95.525	99.4	590.38	0.06294	26.9291
1	64PE449_S02C01	2019-02-03T06:13:42	12.8432	-24.0558	9.2007	9.1581	37.3168	383.797	380.996	34.8017	26.9374	400.867	0.1002	50.52	51.8805	95.5188	99.4	600.55	0.06294	26.9299
1	64PE449_S02C01	2019-02-03T06:13:42	12.8432	-24.0558	9.1855	9.1428	37.3015	384.805	381.998	34.8005	26.9389	401.765	0.1097	50.748	52.1147	95.5265	99.4	603.58	0.06294	26.9311
1	64PE449_S02C01	2019-02-03T06:13:42	12.8432	-24.0558	9.173	9.1303	37.2888	385.813	382.998	34.7991	26.9398	402.593	0.1082	51.137	52.5142	95.5214	99.4	597.81	0.06294	26.9319
1	64PE449_S02C01	2019-02-03T06:13:42	12.8432	-24.0558	9.1691	9.1262	37.2848	386.822	384.004	34.7983	26.9399	403.398	0.1105	51.649	53.04	95.5004	99.4	588.81	0.06294	26.9319
1	64PE449_S02C01	2019-02-03T06:13:42	12.8432	-24.0558	9.1627	9.1198	37.2786	387.83	385.002	34.7977	26.9404	404.277	0.1169	52.247	53.6541	95.517	99.41	578.52	0.06294	26.9325
1	64PE449_S02C01	2019-02-03T06:13:42	12.8432	-24.0558	9.1471	9.1041	37.2629	388.838	386.003	34.7963	26.9419	405.255	0.1083	52.644	54.0619	95.5076	99.4	570.15	0.06294	26.9337
1	64PE449_S02C01	2019-02-03T06:13:42	12.8432	-24.0558	9.0952	9.0522	37.2108	389.847	387.001	34.7933	26.9479	406.353	0.1013	52.851	54.2747	95.5356	99.4	564.62	0.06294	26.9388
1	64PE449_S02C01	2019-02-03T06:13:42	12.8432	-24.0558	9.052	9.0091	37.1651	390.855	387.997	34.788	26.9507	407.521	0.103	53.127	54.5583	95.545	99.41	563.6	0.06294	26.941
1	64PE449_S02C01	2019-02-03T06:13:42	12.8432	-24.0558	9.0379	8.9949	37.1504	391.863	388.998	34.7858	26.9512	408.55	0.0945	53.992	55.4466	95.556	99.41	566.24	0.06294	26.9417
1	64PE449_S02C01	2019-02-03T06:13:42	12.8432	-24.0558	9.0271	8.9839	37.1392	392.872	389.998	34.7842	26.9517	409.463	0.0972	54.76	56.2354	95.5384	99.41	566.33	0.06294	26.9422
1	64PE449_S02C01	2019-02-03T06:13:42	12.8432	-24.0558	9.0127	8.9694	37.1253	393.88	390.999	34.7833	26.9534	410.305	0.1054	55.323	56.8136	95.5615	99.41	564.95	0.06294	26.9438
1	64PE449_S02C01	2019-02-03T06:13:42	12.8432	-24.0558	8.9685	8.9254	37.0801	394.888	392.003	34.7794	26.9574	411.118	0.103	55.765	57.2677	95.5521	99.4	563.46	0.06294	26.9472
1	64PE449_S02C01	2019-02-03T06:13:42	12.8432	-24.0558	8.9464	8.9031	37.0566	395.896	393.002	34.7761	26.9583	412.027	0.1042	56.054	57.5645	95.5714	99.41	565.3	0.06294	26.948
1	64PE449_S02C01	2019-02-03T06:13:42	12.8432	-24.0558	8.9181	8.8749	37.0275	396.905	394.004	34.7729	26.9603	413.089	0.0988	56.133	57.6458	95.5447	99.41	574.04	0.06294	26.95
1	64PE449_S02C01	2019-02-03T06:13:42	12.8432	-24.0558	8.8952	8.8519	37.0041	397.913	395	34.7702	26.9619	414.337	0.0981	56.303	57.8205	95.5785	99.41	588.65	0.06294	26.9516
1	64PE449_S02C01	2019-02-03T06:13:42	12.8432	-24.0558	8.8809	8.8376	36.9894	398.921	395.997	34.768	26.9624	415.566	0.0985	56.491	58.0136	95.6319	99.41	599.45	0.06294	26.9524
1	64PE449_S02C01	2019-02-03T06:13:42	12.8432	-24.0558	8.8726	8.8291	36.9814	399.93	396.999	34.7669	26.9629	416.643	0.0998	56.639	58.1656	95.6356	99.41	603.95	0.06294	26.9532
1	64PE449_S02C01	2019-02-03T06:13:42	12.8432	-24.0558	8.8588	8.8153	36.9677	400.938	397.997	34.7654	26.9639	417.642	0.1014	56.807	58.3382	95.6426	99.41	602.53	0.06294	26.9542
1	64PE449_S02C01	2019-02-03T06:13:42	12.8432	-24.0558	8.8466	8.803	36.9556	401.947	398.998	34.7641	26.9648	418.547	0.1027	56.789	58.3198	95.6412	99.41	592.15	0.06294	26.9552
1	64PE449_S02C01	2019-02-03T06:13:42	12.8432	-24.0558	8.8383	8.7946	36.9474	402.955	400	34.763	26.9653	419.374	0.0959	56.858	58.3907	95.6489	99.41	580.1	0.06294	26.9558
1	64PE449_S02C01	2019-02-03T06:13:42	12.8432	-24.0558	8.8289	8.7851	36.938	403.963	401.003	34.7619	26.9659	420.201	0.092	57.037	58.5745	95.6506	99.41	570.39	0.06294	26.9565
1	64PE449_S02C01	2019-02-03T06:13:42	12.8432	-24.0558	8.8182	8.7744	36.9275	404.972	402.002	34.7606	26.9666	421.126	0.0957	57.258	58.8015	95.654	99.41	560.52	0.06294	26.9573
1	64PE449_S02C01	2019-02-03T06:13:42	12.8432	-24.0558	8.814	8.7701	36.9236	405.98	403.002	34.7599	26.9667	422.142	0.0965	57.625	59.1784	95.6527	99.41	557.22	0.06294	26.9576
1	64PE449_S02C01	2019-02-03T06:13:42	12.8432	-24.0558	8.8065	8.7623	36.9163	406.989	403.996	34.759	26.9672	423.191	0.0903	57.966	59.5287	95.6541	99.41	558.38	0.06294	26.9582
1	64PE449_S02C01	2019-02-03T06:13:42	12.8432	-24.0558	8.7946	8.7505	36.9049	407.997	405.003	34.758	26.9684	424.149	0.0978	58.26	59.8307	95.6648	99.41	558.78	0.06294	26.9594
1	64PE449_S02C01	2019-02-03T06:13:42	12.8432	-24.0558	8.7651	8.721	36.8754	409.005	406.002	34.756	26.9714	425.167	0.1017	58.478	60.0547	95.6741	99.41	567.27	0.06294	26.962
1	64PE449_S02C01	2019-02-03T06:13:42	12.8432	-24.0558	8.7478	8.7036	36.8572	410.014	407.001	34.7534	26.9721	426.312	0.0962	58.748	60.332	95.6911	99.41	580.22	0.06294	26.9627
1	64PE449_S02C01	2019-02-03T06:13:42	12.8432	-24.0558	8.7404	8.6961	36.8499	411.022	407.997	34.7521	26.9723	427.441	0.0947	59.073	60.6658	95.684	99.41	590.41	0.06294	26.9632
1	64PE449_S02C01	2019-02-03T06:13:42	12.8432	-24.0558	8.7299	8.6855	36.8399	412.03	408.998	34.7513	26.9733	428.412	0.0892	59.178	60.7737	95.1921	99.41	594.3	0.06294	26.9642
1	64PE449_S02C01	2019-02-03T06:13:42	12.8432	-24.0558	8.7155	8.671	36.8254	413.039	410.002	34.7498	26.9744	429.327	0.0878	59.213	60.8097	95.4169	99.41	595.11	0.06294	26.9652
1	64PE449_S02C01	2019-02-03T06:13:42	12.8432	-24.0558	8.7058	8.6613	36.8158	414.047	411.002	34.7486	26.975	430.296	0.0991	59.222	60.819	95.7086	99.41	593.91	0.06294	26.9659
1	64PE449_S02C01	2019-02-03T06:13:42	12.8432	-24.0558	8.69	8.6455	36.8001	415.056	412	34.747	26.9763	431.339	0.0982	59.592	61.199	95.706	99.41	591.88	0.06294	26.9671
1	64PE449_S02C01	2019-02-03T06:13:42	12.8432	-24.0558	8.6785	8.6338	36.789	416.064	413.001	34.7462	26.9774	432.374	0.0948	59.901	61.5164	95.705	99.41	587.47	0.06294	26.9683
1	64PE449_S02C01	2019-02-03T06:13:42	12.8432	-24.0558	8.6313	8.5868	36.7418	417.073	414.001	34.7431	26.9824	433.46	0.0956	60.454	62.0846	95.7012	99.41	579.52	0.06294	26.9726
1	64PE449_S02C01	2019-02-03T06:13:42	12.8432	-24.0558	8.589	8.5444	36.6982	418.081	414.995	34.7387	26.9855	434.544	0.1054	61.636	63.2986	95.7382	99.41	573.07	0.06294	26.9752
1	64PE449_S02C01	2019-02-03T06:13:42	12.8432	-24.0558	8.5689	8.5242	36.6774	419.089	415.998	34.7361	26.9866	435.471	0.1057	62.731	64.4233	95.7337	99.41	568.2	0.06294	26.9763
1	64PE449_S02C01	2019-02-03T06:13:42	12.8432	-24.0558	8.5234	8.4788	36.6322	420.098	416.999	34.7332	26.9914	436.31	0.0987	63.706	65.4248	95.7807	99.41	563.81	0.06294	26.9806
1	64PE449_S02C01	2019-02-03T06:13:42	12.8432	-24.0558	8.4928	8.448	36.5997	421.106	418.001	34.7289	26.9928	437.109	0.1007	64.481	66.2208	95.7867	99.41	563.82	0.06294	26.9815
1	64PE449_S02C01	2019-02-03T06:13:42	12.8432	-24.0558	8.4556	8.4111	36.5613	422.115	419.004	34.7245	26.995	437.963	0.0886	64.752	66.4992	95.8068	99.41	569.13	0.06294	26.9837
1	64PE449_S02C01	2019-02-03T06:13:42	12.8432	-24.0558	8.4242	8.3796	36.5297	423.123	420.003	34.7216	26.9976	438.939	0.0934	64.964	66.7171	95.7472	99.41	577.18	0.06294	26.9861
1	64PE449_S02C01	2019-02-03T06:13:42	12.8432	-24.0558	8.3891	8.3445	36.4928	424.132	421.001	34.7167	26.9991	440.089	0.0919	65.436	67.202	95.753	99.41	586.35	0.06294	26.9876
1	64PE449_S02C01	2019-02-03T06:13:42	12.8432	-24.0558	8.3753	8.3306	36.4793	425.14	421.998	34.7149	26.9998	441.34	0.096	66.106	67.8901	95.7987	99.41	597.96	0.06294	26.9887
1	64PE449_S02C01	2019-02-03T06:13:42	12.8432	-24.0558	8.3485	8.3039	36.4522	426.149	422.997	34.7118	27.0015	442.432	0.0974	67.185	68.9984	95.8622	99.41	600.78	0.06294	26.9906
1	64PE449_S02C01	2019-02-03T06:13:42	12.8432	-24.0558	8.3387	8.2938	36.4421	427.157	423.999	34.7101	27.0017	443.409	0.0943	68.185	70.0254	95.851	99.41	596.69	0.06294	26.9909
1	64PE449_S02C01	2019-02-03T06:13:42	12.8432	-24.0558	8.3076	8.2628	36.4115	428.166	424.999	34.7077	27.0046	444.327	0.093	68.834	70.6921	95.8503	99.41	590.83	0.06294	26.9937
1	64PE449_S02C01	2019-02-03T06:13:42	12.8432	-24.0558	8.2783	8.2334	36.3809	429.174	426.001	34.7039	27.006	445.244	0.0926	69.452	71.3269	95.8617	99.41	585.86	0.06294	26.995
1	64PE449_S02C01	2019-02-03T06:13:42	12.8432	-24.0558	8.2504	8.2057	36.3522	430.183	427	34.7003	27.0074	446.187	0.0933	70.135	72.0284	95.8056	99.42	582.43	0.06294	26.9964
1	64PE449_S02C01	2019-02-03T06:13:42	12.8432	-24.0558	8.2291	8.1842	36.3309	431.191	427.999	34.6982	27.0091	447.113	0.0989	70.602	72.5081	95.8436	99.41	579.89	0.06294	26.9979
1	64PE449_S02C01	2019-02-03T06:13:42	12.8432	-24.0558	8.1896	8.1449	36.2906	432.2	429.003	34.694	27.0117	448.054	0.101	70.78	72.6911	95.863	99.41	577.58	0.06294	27.0005
1	64PE449_S02C01	2019-02-03T06:13:42	12.8432	-24.0558	8.1667	8.1218	36.2674	433.208	430.001	34.6913	27.0131	449.072	0.0913	70.973	72.8894	95.8439	99.42	577.34	0.06294	27.0019
1	64PE449_S02C01	2019-02-03T06:13:42	12.8432	-24.0558	8.152	8.1071	36.2523	434.217	430.998	34.6888	27.0134	450.141	0.0858	70.664	72.5721	95.8666	99.42	576.33	0.06294	27.0025
1	64PE449_S02C01	2019-02-03T06:13:42	12.8432	-24.0558	8.1439	8.0989	36.2444	435.225	431.999	34.6875	27.0136	451.137	0.0888	69.893	71.7803	95.8694	99.42	574.88	0.06294	27.003
1	64PE449_S02C01	2019-02-03T06:13:42	12.8432	-24.0558	8.1327	8.0876	36.2336	436.234	433.002	34.6862	27.0143	452.064	0.0863	69.512	71.3891	95.8778	99.42	572.65	0.06294	27.0039
1	64PE449_S02C01	2019-02-03T06:13:42	12.8432	-24.0558	8.117	8.0719	36.2189	437.242	434.001	34.6854	27.016	453.003	0.0883	69.277	71.1479	95.8881	99.42	569.08	0.06294	27.0058
1	64PE449_S02C01	2019-02-03T06:13:42	12.8432	-24.0558	8.0883	8.0431	36.1913	438.251	435.002	34.684	27.0192	454.031	0.0957	69.326	71.1984	95.9033	99.42	571.22	0.06294	27.0089
1	64PE449_S02C01	2019-02-03T06:13:42	12.8432	-24.0558	8.0625	8.0173	36.1652	439.259	436.002	34.6811	27.0208	455.157	0.0958	69.544	71.4224	95.9419	99.42	579.02	0.06294	27.0104
1	64PE449_S02C01	2019-02-03T06:13:42	12.8432	-24.0558	8.053	8.0078	36.1563	440.268	436.997	34.68	27.0213	456.333	0.0927	69.741	71.6248	95.9477	99.42	589.79	0.06294	27.0113
1	64PE449_S02C01	2019-02-03T06:13:42	12.8432	-24.0558	8.0412	7.9959	36.1447	441.276	437.997	34.6786	27.022	457.363	0.0988	69.829	71.7152	95.9168	99.42	592.44	0.06294	27.0122
1	64PE449_S02C01	2019-02-03T06:13:42	12.8432	-24.0558	8.0259	7.9804	36.1301	442.285	438.998	34.6777	27.0236	458.264	0.1019	68.877	70.7376	95.9563	99.42	588.31	0.06294	27.0136
1	64PE449_S02C01	2019-02-03T06:13:42	12.8432	-24.0558	7.9978	7.9526	36.1024	443.294	439.998	34.6754	27.026	459.105	0.1005	67.431	69.2527	95.9428	99.42	586.73	0.06294	27.016
1	64PE449_S02C01	2019-02-03T06:13:42	12.8432	-24.0558	7.9828	7.9374	36.087	444.302	441.002	34.6733	27.0266	459.916	0.0977	66.705	68.5071	95.9336	99.42	584.9	0.06294	27.0166
1	64PE449_S02C01	2019-02-03T06:13:42	12.8432	-24.0558	7.9856	7.94	36.0911	445.311	442.003	34.6739	27.0267	460.786	0.0914	66.881	68.6879	95.9491	99.42	577.57	0.06294	27.0171
1	64PE449_S02C01	2019-02-03T06:13:42	12.8432	-24.0558	7.9847	7.9391	36.0933	446.319	443.003	34.6762	27.0286	461.758	0.0801	67.582	69.408	95.9605	99.42	567.41	0.06294	27.0193
1	64PE449_S02C01	2019-02-03T06:13:42	12.8432	-24.0558	7.9693	7.9236	36.078	447.328	444.003	34.6746	27.0297	462.882	0.0857	69.043	70.9086	95.9538	99.42	563.87	0.06294	27.0204
1	64PE449_S02C01	2019-02-03T06:13:42	12.8432	-24.0558	7.9551	7.9094	36.063	448.336	444.996	34.6719	27.0297	464.151	0.0912	72.671	74.6346	95.9654	99.42	569.74	0.06294	27.0206
1	64PE449_S02C01	2019-02-03T06:13:42	12.8432	-24.0558	7.9377	7.8918	36.0455	449.345	445.997	34.6701	27.0309	465.272	0.0982	76.026	78.0803	95.9788	99.42	575.62	0.06294	27.0216
1	64PE449_S02C01	2019-02-03T06:13:42	12.8432	-24.0558	7.8784	7.8327	35.9862	450.354	446.999	34.6657	27.0362	466.234	0.1049	77.6	79.6972	95.9847	99.41	581.92	0.06294	27.0261
1	64PE449_S02C01	2019-02-03T06:13:42	12.8432	-24.0558	7.8035	7.758	35.9072	451.362	448.001	34.6561	27.0396	467.148	0.0948	78.471	80.5919	95.9755	99.41	588.68	0.06294	27.0283
1	64PE449_S02C01	2019-02-03T06:13:42	12.8432	-24.0558	7.7894	7.7438	35.8914	452.371	449.002	34.6522	27.0387	468.093	0.0912	79.258	81.4002	95.9812	99.42	597.34	0.06294	27.0276
1	64PE449_S02C01	2019-02-03T06:13:42	12.8432	-24.0558	7.7791	7.7334	35.8806	453.379	449.999	34.6499	27.0384	469.084	0.0827	80.782	82.9653	95.9453	99.42	600.49	0.06294	27.0276
1	64PE449_S02C01	2019-02-03T06:13:42	12.8432	-24.0558	7.7719	7.7261	35.873	454.388	450.999	34.648	27.038	470.036	0.0892	82.505	84.7349	95.9555	99.43	596.96	0.06294	27.0276
1	64PE449_S02C01	2019-02-03T06:13:42	12.8432	-24.0558	7.7527	7.7069	35.854	455.397	452.002	34.646	27.0392	470.978	0.0835	82.891	85.1314	95.9924	99.43	591.79	0.06294	27.0288
1	64PE449_S02C01	2019-02-03T06:13:42	12.8432	-24.0558	7.7179	7.6722	35.8181	456.405	452.999	34.6417	27.0408	471.942	0.0899	81.366	83.5653	95.9829	99.43	583.62	0.06294	27.0302
1	64PE449_S02C01	2019-02-03T06:13:42	12.8432	-24.0558	7.6886	7.6429	35.7888	457.414	454.001	34.6388	27.0428	472.9	0.0926	79.475	81.6234	95.9856	99.44	574.49	0.06294	27.0321
1	64PE449_S02C01	2019-02-03T06:13:42	12.8432	-24.0558	7.6686	7.6228	35.7693	458.423	455.001	34.6371	27.0445	473.884	0.0838	79.189	81.3298	95.9877	99.44	572.17	0.06294	27.0338
1	64PE449_S02C01	2019-02-03T06:13:42	12.8432	-24.0558	7.6401	7.5943	35.7452	459.431	456	34.639	27.0501	474.932	0.081	80.026	82.1899	95.9921	99.44	573.81	0.06294	27.0394
1	64PE449_S02C01	2019-02-03T06:13:42	12.8432	-24.0558	7.6061	7.5603	35.7122	460.44	457.001	34.6368	27.0533	476.012	0.0888	81.086	83.2788	95.9921	99.44	576.23	0.06294	27.0424
1	64PE449_S02C01	2019-02-03T06:13:42	12.8432	-24.0558	7.5766	7.5308	35.6818	461.448	457.996	34.6328	27.0544	477.069	0.0935	81.782	83.9937	95.934	99.44	576.21	0.06294	27.0435
1	64PE449_S02C01	2019-02-03T06:13:42	12.8432	-24.0558	7.5478	7.5021	35.6528	462.457	458.999	34.6296	27.0561	478.008	0.0877	82.182	84.4046	95.948	99.44	577.32	0.06294	27.0451
1	64PE449_S02C01	2019-02-03T06:13:42	12.8432	-24.0558	7.5254	7.4796	35.6301	463.466	460.003	34.6269	27.0571	478.899	0.0947	82.461	84.6913	96.0045	99.44	580.67	0.06294	27.0462
1	64PE449_S02C01	2019-02-03T06:13:42	12.8432	-24.0558	7.5068	7.4609	35.6119	464.474	461.002	34.625	27.0584	479.86	0.089	81.648	83.8564	96.0125	99.44	584.12	0.06294	27.0475
1	64PE449_S02C01	2019-02-03T06:13:42	12.8432	-24.0558	7.4761	7.4303	35.5817	465.483	462.001	34.6224	27.0607	480.933	0.0803	80.499	82.6765	95.9989	99.44	589.43	0.06294	27.0498
1	64PE449_S02C01	2019-02-03T06:13:42	12.8432	-24.0558	7.4605	7.4146	35.5671	466.492	462.997	34.6213	27.0621	482.037	0.0851	80.043	82.2083	96.0245	99.45	590.1	0.06294	27.0515
1	64PE449_S02C01	2019-02-03T06:13:42	12.8432	-24.0558	7.4613	7.4153	35.5697	467.5	463.998	34.6221	27.0626	483.026	0.0875	80.054	82.2197	96.0232	99.44	587.97	0.06294	27.0525
1	64PE449_S02C01	2019-02-03T06:13:42	12.8432	-24.0558	7.4612	7.4152	35.5702	468.509	465	34.6217	27.0623	483.938	0.0851	79.915	82.0769	96.0075	99.45	580.85	0.06294	27.0527
1	64PE449_S02C01	2019-02-03T06:13:42	12.8432	-24.0558	7.4608	7.4146	35.5705	469.518	466.001	34.6216	27.0623	484.833	0.0856	79.683	81.8387	95.9979	99.44	576.38	0.06294	27.053
1	64PE449_S02C01	2019-02-03T06:13:42	12.8432	-24.0558	7.4596	7.4133	35.5699	470.526	467.003	34.6212	27.0622	485.788	0.0877	79.801	81.9599	95.9935	99.44	577.84	0.06294	27.0532
1	64PE449_S02C01	2019-02-03T06:13:42	12.8432	-24.0558	7.46	7.4136	35.571	471.535	468	34.6211	27.0621	486.834	0.0832	81.131	83.3259	95.9818	99.44	582.18	0.06294	27.0534
1	64PE449_S02C01	2019-02-03T06:13:42	12.8432	-24.0558	7.4601	7.4136	35.5718	472.544	468.997	34.621	27.062	487.873	0.0762	83.047	85.2937	96.0143	99.45	591.37	0.06294	27.0535
1	64PE449_S02C01	2019-02-03T06:13:42	12.8432	-24.0558	7.4281	7.3815	35.5414	473.553	470.001	34.6201	27.0658	488.86	0.083	84.042	86.3159	96.017	99.44	593.41	0.06294	27.0569
1	64PE449_S02C01	2019-02-03T06:13:42	12.8432	-24.0558	7.3692	7.3228	35.4814	474.561	471.001	34.6142	27.0696	489.883	0.0875	84.336	86.6181	96.0102	99.44	587.95	0.06294	27.0598
1	64PE449_S02C01	2019-02-03T06:13:42	12.8432	-24.0558	7.353	7.3065	35.4642	475.57	471.999	34.6111	27.0694	490.961	0.0826	84.617	86.9067	96.0008	99.44	579.43	0.06294	27.0597
1	64PE449_S02C01	2019-02-03T06:13:42	12.8432	-24.0558	7.3388	7.2924	35.4503	476.579	472.999	34.6094	27.0701	492.001	0.0774	85.342	87.6514	96.0358	99.44	575.6	0.06294	27.0605
1	64PE449_S02C01	2019-02-03T06:13:42	12.8432	-24.0558	7.3249	7.2784	35.4368	477.587	474.001	34.608	27.071	492.987	0.0782	86.818	89.1674	96.0418	99.45	576.82	0.06294	27.0615
1	64PE449_S02C01	2019-02-03T06:13:42	12.8432	-24.0558	7.3089	7.2623	35.4208	478.596	474.999	34.606	27.0717	494	0.0811	89.194	91.6078	96.0132	99.45	577.9	0.06294	27.0623
1	64PE449_S02C01	2019-02-03T06:13:42	12.8432	-24.0558	7.2929	7.2461	35.4044	479.605	475.998	34.6039	27.0723	494.984	0.0799	90.699	93.1536	96.0217	99.44	577.81	0.06294	27.0627
1	64PE449_S02C01	2019-02-03T06:13:42	12.8432	-24.0558	7.2217	7.1755	35.3344	480.614	477	34.5993	27.0786	495.897	0.0813	89.69	92.1177	96.0249	99.44	578.4	0.06294	27.0681
1	64PE449_S02C01	2019-02-03T06:13:42	12.8432	-24.0558	7.1831	7.1367	35.2936	481.622	477.998	34.5935	27.0795	496.779	0.0674	89.292	91.709	96.0186	99.45	584.19	0.06294	27.0686
1	64PE449_S02C01	2019-02-03T06:13:42	12.8432	-24.0558	7.1643	7.1178	35.2741	482.631	478.999	34.5903	27.0796	497.642	0.0736	90.044	92.4814	96.0284	99.45	589.22	0.06294	27.0688
1	64PE449_S02C01	2019-02-03T06:13:42	12.8432	-24.0558	7.1724	7.1258	35.2846	483.64	480.004	34.5923	27.0801	498.519	0.08	90.759	93.2158	96.0414	99.45	591.02	0.06294	27.0699
1	64PE449_S02C01	2019-02-03T06:13:42	12.8432	-24.0558	7.129	7.0825	35.2422	484.649	481.002	34.5894	27.0839	499.506	0.0714	92.733	95.2436	96.0355	99.45	593.24	0.06294	27.0733
1	64PE449_S02C01	2019-02-03T06:13:42	12.8432	-24.0558	7.1195	7.073	35.2315	485.657	482.001	34.5862	27.0826	500.605	0.0756	94.908	97.4774	96.0449	99.45	595.38	0.06294	27.0724
1	64PE449_S02C01	2019-02-03T06:13:42	12.8432	-24.0558	7.073	7.0264	35.1857	486.666	483	34.5828	27.0864	501.785	0.0765	95.692	98.2829	96.04	99.46	588.67	0.06294	27.0757
1	64PE449_S02C01	2019-02-03T06:13:42	12.8432	-24.0558	7.0259	6.9795	35.1362	487.675	483.999	34.5756	27.0873	502.979	0.0761	96.187	98.7914	96.0508	99.46	578.11	0.06294	27.0763
1	64PE449_S02C01	2019-02-03T06:13:42	12.8432	-24.0558	7.0173	6.9708	35.1276	488.684	484.996	34.5737	27.087	504.041	0.0797	96.672	99.2895	96.0322	99.46	570.28	0.06294	27.0764
1	64PE449_S02C01	2019-02-03T06:13:42	12.8432	-24.0558	7.0051	6.9586	35.116	489.693	485.999	34.5723	27.0876	504.998	0.0826	97.673	100.318	96.0357	99.46	568.85	0.06294	27.0773
1	64PE449_S02C01	2019-02-03T06:13:42	12.8432	-24.0558	6.9856	6.9391	35.0968	490.701	487	34.5703	27.0887	505.89	0.082	98.551	101.22	96.0494	99.47	572.14	0.06294	27.0784
1	64PE449_S02C01	2019-02-03T06:13:42	12.8432	-24.0558	6.9551	6.9085	35.0681	491.71	488.002	34.5691	27.092	506.785	0.079	99.121	101.805	96.0591	99.47	578.02	0.06294	27.0815
1	64PE449_S02C01	2019-02-03T06:13:42	12.8432	-24.0558	6.9117	6.8653	35.0242	492.719	488.999	34.5644	27.0942	507.733	0.0725	99.78	102.482	96.069	99.47	582.88	0.06294	27.0833
1	64PE449_S02C01	2019-02-03T06:13:42	12.8432	-24.0558	6.901	6.8545	35.0132	493.728	490	34.5621	27.0938	508.66	0.0749	100.24	102.955	96.0446	99.48	587.82	0.06294	27.0833
1	64PE449_S02C01	2019-02-03T06:13:42	12.8432	-24.0558	6.8861	6.8395	34.9998	494.736	491.002	34.5618	27.0956	509.55	0.0823	100.107	102.818	96.0153	99.49	590.61	0.06294	27.0851
1	64PE449_S02C01	2019-02-03T06:13:42	12.8432	-24.0558	6.841	6.7946	34.955	495.745	492.001	34.5577	27.0986	510.497	0.0803	98.815	101.492	96.0654	99.48	588.9	0.06294	27.0877
1	64PE449_S02C01	2019-02-03T06:13:42	12.8432	-24.0558	6.8268	6.7802	34.9412	496.754	493.001	34.5559	27.0991	511.538	0.0703	96.965	99.5916	96.0695	99.49	587.22	0.06294	27.0885
1	64PE449_S02C01	2019-02-03T06:13:42	12.8432	-24.0558	6.8292	6.7825	34.9446	497.763	494.002	34.5559	27.0988	512.672	0.0752	95.929	98.5276	96.0683	99.49	586.48	0.06294	27.0888
1	64PE449_S02C01	2019-02-03T06:13:42	12.8432	-24.0558	6.8417	6.7948	34.9614	498.772	494.999	34.5604	27.1006	513.879	0.0708	95.82	98.4159	96.0724	99.5	584.7	0.06294	27.0915
1	64PE449_S02C01	2019-02-03T06:13:42	12.8432	-24.0558	6.8383	6.7914	34.9587	499.781	495.997	34.5599	27.1007	514.985	0.0756	95.075	97.6508	96.0683	99.49	584.23	0.06294	27.0919
1	64PE449_S02C01	2019-02-03T06:13:42	12.8432	-24.0558	6.8297	6.7827	34.9522	500.789	496.997	34.5607	27.1025	515.955	0.0696	92.842	95.3574	96.0618	99.5	585.04	0.06294	27.0938
1	64PE449_S02C01	2019-02-03T06:13:42	12.8432	-24.0558	6.8185	6.7715	34.9408	501.798	498	34.5588	27.1025	516.857	0.0615	91.403	93.8795	96.0615	99.49	586.86	0.06294	27.0939
1	64PE449_S02C01	2019-02-03T06:13:42	12.8432	-24.0558	6.8365	6.7893	34.9606	502.807	499	34.5612	27.102	517.75	0.0679	91.051	93.5179	96.0677	99.49	588.18	0.06294	27.0941
1	64PE449_S02C01	2019-02-03T06:13:42	12.8432	-24.0558	6.8498	6.8025	34.9779	503.816	500	34.5658	27.1039	518.682	0.0781	91.11	93.5787	96.0646	99.48	586.59	0.06294	27.0963
1	64PE449_S02C01	2019-02-03T06:13:42	12.8432	-24.0558	6.8406	6.7932	34.9696	504.825	501	34.5655	27.1049	519.614	0.077	90.653	93.1095	96.0031	99.48	583.09	0.06294	27.0973
1	64PE449_S02C01	2019-02-03T06:13:42	12.8432	-24.0558	6.8353	6.7878	34.9646	505.834	502.002	34.5648	27.1051	520.555	0.0721	88.335	90.7287	96.071	99.48	580.94	0.06294	27.0975
1	64PE449_S02C01	2019-02-03T06:13:42	12.8432	-24.0558	6.8335	6.7859	34.9634	506.843	503.002	34.5648	27.1053	521.58	0.0653	85.417	87.7316	96.0693	99.47	579.94	0.06294	27.0978
1	64PE449_S02C01	2019-02-03T06:13:42	12.8432	-24.0558	6.8528	6.8051	34.985	507.851	504.002	34.5677	27.105	522.722	0.0691	83.035	85.2851	96.071	99.46	587.06	0.06294	27.0981
1	64PE449_S02C01	2019-02-03T06:13:42	12.8432	-24.0558	6.8794	6.8314	35.0169	508.86	504.997	34.575	27.1071	523.936	0.0715	82.082	84.3065	96.0425	99.46	593.92	0.06294	27.1008
1	64PE449_S02C01	2019-02-03T06:13:42	12.8432	-24.0558	6.8799	6.8319	35.0207	509.869	505.997	34.5782	27.1096	525.008	0.0701	83.007	85.2568	96.0567	99.46	596.87	0.06294	27.1032
1	64PE449_S02C01	2019-02-03T06:13:42	12.8432	-24.0558	6.8753	6.8271	35.0175	510.878	506.997	34.579	27.1109	525.94	0.0756	84.502	86.7924	96.0493	99.46	593.52	0.06294	27.1044
1	64PE449_S02C01	2019-02-03T06:13:42	12.8432	-24.0558	6.8637	6.8155	35.0063	511.887	508.001	34.5781	27.1118	526.805	0.082	86.173	88.5087	96.059	99.45	586.71	0.06294	27.105
1	64PE449_S02C01	2019-02-03T06:13:42	12.8432	-24.0558	6.8493	6.8011	34.9914	512.896	509.004	34.576	27.1121	527.7	0.0808	87.559	89.9323	96.067	99.45	579.5	0.06294	27.105
1	64PE449_S02C01	2019-02-03T06:13:42	12.8432	-24.0558	6.8247	6.7765	34.9663	513.905	510.001	34.5732	27.1132	528.703	0.0806	88.171	90.5609	96.065	99.45	575.87	0.06294	27.1057
1	64PE449_S02C01	2019-02-03T06:13:42	12.8432	-24.0558	6.8012	6.7529	34.9409	514.914	511	34.5689	27.113	529.794	0.0706	86.722	89.0726	96.0632	99.45	584.97	0.06294	27.1051
1	64PE449_S02C01	2019-02-03T06:13:42	12.8432	-24.0558	6.7948	6.7465	34.9343	515.923	511.996	34.5674	27.1127	530.851	0.0696	83.461	85.7232	96.0569	99.44	596.76	0.06294	27.1049
1	64PE449_S02C01	2019-02-03T06:13:42	12.8432	-24.0558	6.7958	6.7474	34.9358	516.932	512.997	34.5673	27.1125	531.766	0.0737	81.575	83.7861	96.0695	99.44	598.37	0.06294	27.1048
1	64PE449_S02C01	2019-02-03T06:13:42	12.8432	-24.0558	6.8152	6.7666	34.9583	517.94	514.002	34.5714	27.1131	532.621	0.0756	81.263	83.4657	96.0624	99.45	591.38	0.06294	27.106
1	64PE449_S02C01	2019-02-03T06:13:42	12.8432	-24.0558	6.8278	6.779	34.9749	518.949	515.004	34.5763	27.1153	533.517	0.0737	81.477	83.6857	96.0567	99.45	582.58	0.06294	27.1084
1	64PE449_S02C01	2019-02-03T06:13:42	12.8432	-24.0558	6.8174	6.7686	34.9657	519.958	516.003	34.5762	27.1167	534.565	0.0756	81.87	84.0895	96.0451	99.45	579.81	0.06294	27.1096
1	64PE449_S02C01	2019-02-03T06:13:42	12.8432	-24.0558	6.8132	6.7643	34.9616	520.967	517	34.5755	27.1167	535.768	0.075	82.593	84.8321	96.0623	99.45	585.8	0.06294	27.1096
1	64PE449_S02C01	2019-02-03T06:13:42	12.8432	-24.0558	6.8086	6.7596	34.9577	521.976	517.997	34.5753	27.1172	536.94	0.081	83.773	86.0441	96.0465	99.44	597.64	0.06294	27.1101
1	64PE449_S02C01	2019-02-03T06:13:42	12.8432	-24.0558	6.7971	6.7481	34.9466	522.985	518.998	34.5745	27.1181	537.962	0.0851	83.798	86.0698	96.051	99.45	600.09	0.06294	27.1108
1	64PE449_S02C01	2019-02-03T06:13:42	12.8432	-24.0558	6.7761	6.727	34.9257	523.994	520	34.5725	27.1194	538.92	0.086	83.301	85.5594	96.0035	99.44	593.06	0.06294	27.1116
1	64PE449_S02C01	2019-02-03T06:13:42	12.8432	-24.0558	6.7457	6.6968	34.8955	525.003	521	34.5697	27.1213	539.852	0.0768	83.085	85.3377	96.0663	99.44	584.11	0.06294	27.1131
1	64PE449_S02C01	2019-02-03T06:13:42	12.8432	-24.0558	6.7438	6.6947	34.895	526.012	521.999	34.5706	27.1223	540.77	0.0758	82.978	85.2279	96.0737	99.44	580.15	0.06294	27.1142
1	64PE449_S02C01	2019-02-03T06:13:42	12.8432	-24.0558	6.7441	6.6949	34.8958	527.021	523	34.5705	27.1221	541.684	0.0714	83.063	85.3152	96.0658	99.45	582.14	0.06294	27.1142
1	64PE449_S02C01	2019-02-03T06:13:42	12.8432	-24.0558	6.7421	6.6929	34.8944	528.03	524.002	34.5702	27.1222	542.612	0.0759	82.946	85.195	96.0729	99.44	587.98	0.06294	27.1144
1	64PE449_S02C01	2019-02-03T06:13:42	12.8432	-24.0558	6.7405	6.6912	34.8931	529.039	525.001	34.5698	27.1221	543.61	0.0783	82.742	84.9855	96.0715	99.44	591.13	0.06294	27.1144
1	64PE449_S02C01	2019-02-03T06:13:42	12.8432	-24.0558	6.7392	6.6898	34.8923	530.048	526.001	34.5695	27.1221	544.659	0.0839	82.465	84.701	96.0661	99.44	590.81	0.06294	27.1145
1	64PE449_S02C01	2019-02-03T06:13:42	12.8432	-24.0558	6.7394	6.6899	34.8931	531.057	527.001	34.5696	27.1221	545.757	0.0868	82.337	84.5695	96.0763	99.44	592.22	0.06294	27.1146
1	64PE449_S02C01	2019-02-03T06:13:42	12.8432	-24.0558	6.7406	6.6909	34.8951	532.066	527.997	34.57	27.1223	546.885	0.079	82.277	84.5079	96.0689	99.44	596.49	0.06294	27.1149
1	64PE449_S02C01	2019-02-03T06:13:42	12.8432	-24.0558	6.7413	6.6915	34.8965	533.075	528.999	34.5702	27.1224	547.934	0.0777	82.288	84.5192	96.0594	99.44	592.3	0.06294	27.1151
1	64PE449_S02C01	2019-02-03T06:13:42	12.8432	-24.0558	6.741	6.6911	34.8969	534.084	530.001	34.5704	27.1226	548.935	0.0786	82.156	84.3837	96.0667	99.44	585.23	0.06294	27.1153
1	64PE449_S02C01	2019-02-03T06:13:42	12.8432	-24.0558	6.7397	6.6897	34.8962	535.093	531	34.5703	27.1227	549.98	0.0814	81.881	84.1012	96.0655	99.44	583.27	0.06294	27.1155
1	64PE449_S02C01	2019-02-03T06:13:42	12.8432	-24.0558	6.7354	6.6854	34.8924	536.102	531.998	34.5699	27.123	550.994	0.0776	81.705	83.9205	96.0627	99.44	586.66	0.06294	27.1158
1	64PE449_S02C01	2019-02-03T06:13:42	12.8432	-24.0558	6.7326	6.6825	34.8903	537.111	532.999	34.5699	27.1234	551.926	0.0803	81.621	83.8342	96.0561	99.44	587.33	0.06294	27.1161
1	64PE449_S02C01	2019-02-03T06:13:42	12.8432	-24.0558	6.7307	6.6805	34.8888	538.12	533.999	34.5698	27.1235	552.806	0.0881	81.612	83.825	96.0717	99.44	586.09	0.06294	27.1163
1	64PE449_S02C01	2019-02-03T06:13:42	12.8432	-24.0558	6.7294	6.6791	34.8881	539.129	535.002	34.5697	27.1237	553.673	0.0827	81.745	83.9616	96.0772	99.44	586.4	0.06294	27.1165
1	64PE449_S02C01	2019-02-03T06:13:42	12.8432	-24.0558	6.7267	6.6764	34.8856	540.138	536.002	34.5692	27.1236	554.627	0.0801	81.973	84.1958	96.0788	99.44	587.39	0.06294	27.1164
1	64PE449_S02C01	2019-02-03T06:13:42	12.8432	-24.0558	6.7206	6.6701	34.8801	541.147	537.002	34.5689	27.1242	555.682	0.0787	81.943	84.165	96.0742	99.44	587.49	0.06294	27.1169
1	64PE449_S02C01	2019-02-03T06:13:42	12.8432	-24.0558	6.7115	6.661	34.8712	542.156	538.001	34.5679	27.1247	556.814	0.0781	81.788	84.0059	96.0795	99.44	591.24	0.06294	27.1172
1	64PE449_S02C01	2019-02-03T06:13:42	12.8432	-24.0558	6.7097	6.6591	34.8701	543.165	538.998	34.5679	27.125	557.935	0.0768	81.666	83.8806	96.0466	99.44	598.63	0.06294	27.1175
1	64PE449_S02C01	2019-02-03T06:13:42	12.8432	-24.0558	6.7048	6.6541	34.8661	544.174	540.002	34.568	27.1257	558.999	0.0773	81.793	84.0111	96.0697	99.44	602.38	0.06294	27.1182
1	64PE449_S02C01	2019-02-03T06:13:42	12.8432	-24.0558	6.6994	6.6487	34.8615	545.183	541	34.5678	27.1263	560.116	0.079	81.993	84.2166	96.0738	99.44	602.11	0.06294	27.1188
1	64PE449_S02C01	2019-02-03T06:13:42	12.8432	-24.0558	6.6948	6.6439	34.8574	546.192	541.998	34.5675	27.1267	561.213	0.0876	82.745	84.989	96.0889	99.44	597.31	0.06294	27.1192
1	64PE449_S02C01	2019-02-03T06:13:42	12.8432	-24.0558	6.6859	6.635	34.8496	547.201	542.999	34.5675	27.1279	562.213	0.0848	84.858	87.1594	96.0906	99.44	593.83	0.06294	27.1203
1	64PE449_S02C01	2019-02-03T06:13:42	12.8432	-24.0558	6.6675	6.6166	34.8318	548.21	543.998	34.5661	27.1293	563.15	0.0792	87.19	89.5547	96.0796	99.44	595.06	0.06294	27.1213
1	64PE449_S02C01	2019-02-03T06:13:42	12.8432	-24.0558	6.6502	6.5993	34.8146	549.219	544.998	34.5645	27.1302	564.034	0.0824	88.243	90.6363	96.0863	99.44	600.9	0.06294	27.1221
1	64PE449_S02C01	2019-02-03T06:13:42	12.8432	-24.0558	6.6124	6.5615	34.7766	550.229	546	34.5608	27.1324	564.879	0.0949	88.545	90.9467	96.0923	99.44	600.05	0.06294	27.1235
1	64PE449_S02C01	2019-02-03T06:13:42	12.8432	-24.0558	6.5818	6.531	34.7444	551.238	547.003	34.556	27.1327	565.713	0.0916	88.481	90.8809	96.0948	99.44	591.07	0.06294	27.1234
1	64PE449_S02C01	2019-02-03T06:13:42	12.8432	-24.0558	6.5754	6.5245	34.7385	552.247	548.004	34.5551	27.1329	566.628	0.0811	88.386	90.7834	96.0918	99.44	579.41	0.06294	27.1237
1	64PE449_S02C01	2019-02-03T06:13:42	12.8432	-24.0558	6.5748	6.5238	34.7381	553.256	549.003	34.5545	27.1325	567.703	0.0673	88.891	91.3021	96.0475	99.44	575.95	0.06294	27.1237
1	64PE449_S02C01	2019-02-03T06:13:42	12.8432	-24.0558	6.5689	6.5177	34.7328	554.265	549.999	34.5539	27.1328	568.981	0.0708	87.934	90.3191	96.0903	99.44	589.13	0.06294	27.1241
1	64PE449_S02C01	2019-02-03T06:13:42	12.8432	-24.0558	6.5386	6.4877	34.7031	555.274	550.997	34.5512	27.1347	570.216	0.0749	86.272	88.6122	96.0944	99.45	609.54	0.06294	27.1258
1	64PE449_S02C01	2019-02-03T06:13:42	12.8432	-24.0558	6.5491	6.4979	34.7153	556.283	551.999	34.5532	27.1349	571.237	0.0861	85.153	87.4629	96.0857	99.45	622.19	0.06294	27.1264
1	64PE449_S02C01	2019-02-03T06:13:42	12.8432	-24.0558	6.5491	6.4978	34.7167	557.292	552.999	34.554	27.1355	572.177	0.0895	84.83	87.1312	96.0856	99.45	626.73	0.06294	27.1273
1	64PE449_S02C01	2019-02-03T06:13:42	12.8432	-24.0558	6.5489	6.4975	34.7188	558.301	554.003	34.5557	27.1369	573.128	0.0836	85.124	87.4333	96.0773	99.45	621.52	0.06294	27.1288
1	64PE449_S02C01	2019-02-03T06:13:42	12.8432	-24.0558	6.5465	6.495	34.7176	559.31	555	34.5562	27.1377	574.161	0.0885	85.733	88.0589	96.0741	99.45	614.46	0.06294	27.1297
1	64PE449_S02C01	2019-02-03T06:13:42	12.8432	-24.0558	6.5374	6.4858	34.7092	560.319	555.999	34.5557	27.1384	575.224	0.0831	86.071	88.4061	96.0778	99.44	610.12	0.06294	27.1304
1	64PE449_S02C01	2019-02-03T06:13:42	12.8432	-24.0558	6.5284	6.4768	34.7002	561.329	556.998	34.5543	27.1386	576.213	0.0815	86.613	88.9629	96.0656	17.54	607.62	0.06294	27.1305
1	64PE449_S02C01	2019-02-03T06:13:42	12.8432	-24.0558	6.526	6.4744	34.6979	562.338	557.999	34.5536	27.1383	577.133	0.0829	87.705	90.0845	96.0552	77.58	602.34	0.06294	27.1303
1	64PE449_S02C01	2019-02-03T06:13:42	12.8432	-24.0558	6.5237	6.4719	34.6962	563.347	559.001	34.5534	27.1385	578.023	0.0726	88.859	91.2698	96.0774	99.48	594.35	0.06294	27.1305
1	64PE449_S02C01	2019-02-03T06:13:42	12.8432	-24.0558	6.506	6.4542	34.6789	564.356	560.002	34.5518	27.1396	578.964	0.0727	89.93	92.3699	96.0937	99.45	585.31	0.06294	27.1314
1	64PE449_S02C01	2019-02-03T06:13:42	12.8432	-24.0558	6.491	6.4391	34.6633	565.365	561.002	34.5494	27.1397	580.015	0.073	90.396	92.8486	96.0816	99.44	581.76	0.06294	27.1313
1	64PE449_S02C01	2019-02-03T06:13:42	12.8432	-24.0558	6.4716	6.4198	34.6438	566.374	562	34.5471	27.1404	581.134	0.0749	89.221	91.6417	96.0843	99.44	587.29	0.06294	27.1318
1	64PE449_S02C01	2019-02-03T06:13:42	12.8432	-24.0558	6.4616	6.4097	34.6337	567.383	562.999	34.5454	27.1404	582.251	0.0788	85.756	88.0827	96.091	99.45	596.71	0.06294	27.1318
1	64PE449_S02C01	2019-02-03T06:13:42	12.8432	-24.0558	6.4596	6.4078	34.6325	568.393	564	34.5452	27.1405	583.325	0.0829	83.325	85.5858	96.0915	99.45	607.82	0.06294	27.1323
1	64PE449_S02C01	2019-02-03T06:13:42	12.8432	-24.0558	6.4916	6.4392	34.6688	569.402	564.997	34.5519	27.1416	584.365	0.0762	82.813	85.06	96.1017	99.45	618.81	0.06294	27.134
1	64PE449_S02C01	2019-02-03T06:13:42	12.8432	-24.0558	6.4934	6.4411	34.6738	570.411	566	34.5548	27.1437	585.329	0.0725	82.822	85.0695	96.0952	99.45	623.71	0.06294	27.1363
1	64PE449_S02C01	2019-02-03T06:13:42	12.8432	-24.0558	6.4901	6.4377	34.671	571.42	567	34.5546	27.1439	586.266	0.0775	82.881	85.1301	96.0832	99.45	620.08	0.06294	27.1365
1	64PE449_S02C01	2019-02-03T06:13:42	12.8432	-24.0558	6.4836	6.4312	34.6657	572.429	568.002	34.5547	27.1449	587.271	0.0835	82.965	85.2165	96.0835	99.45	611.24	0.06294	27.1375
1	64PE449_S02C01	2019-02-03T06:13:42	12.8432	-24.0558	6.4813	6.4288	34.6638	573.439	569.001	34.5544	27.145	588.379	0.0762	83.005	85.2575	96.0777	99.44	602.98	0.06294	27.1375
1	64PE449_S02C01	2019-02-03T06:13:42	12.8432	-24.0558	6.4797	6.4271	34.6627	574.448	569.999	34.5543	27.1451	589.52	0.0773	82.958	85.2093	96.0556	99.44	602.37	0.06294	27.1377
1	64PE449_S02C01	2019-02-03T06:13:42	12.8432	-24.0558	6.4791	6.4263	34.6625	575.457	570.998	34.5542	27.1451	590.607	0.0782	83.081	85.3356	96.0811	99.44	602.89	0.06294	27.1377
1	64PE449_S02C01	2019-02-03T06:13:42	12.8432	-24.0558	6.4784	6.4256	34.6624	576.466	571.999	34.5542	27.1453	591.603	0.0813	83.053	85.3069	96.0904	99.44	598.83	0.06294	27.1379
1	64PE449_S02C01	2019-02-03T06:13:42	12.8432	-24.0558	6.4763	6.4234	34.6608	577.475	572.999	34.5542	27.1455	592.528	0.079	83.213	85.4712	96.0557	99.44	592.92	0.06294	27.1381
1	64PE449_S02C01	2019-02-03T06:13:42	12.8432	-24.0558	6.4686	6.4156	34.6542	578.485	574	34.5542	27.1466	593.413	0.0718	83.433	85.6973	96.0652	99.44	591.64	0.06294	27.1391
1	64PE449_S02C01	2019-02-03T06:13:42	12.8432	-24.0558	6.4597	6.4066	34.6457	579.494	575.002	34.5534	27.1471	594.297	0.0718	83.667	85.9377	96.0562	99.44	596.36	0.06294	27.1394
1	64PE449_S02C01	2019-02-03T06:13:42	12.8432	-24.0558	6.4475	6.3945	34.6342	580.503	576.002	34.5527	27.1481	595.261	0.0715	83.833	86.1083	96.0829	99.44	601.12	0.06294	27.1403
1	64PE449_S02C01	2019-02-03T06:13:42	12.8432	-24.0558	6.4381	6.385	34.6254	581.512	577.002	34.552	27.1489	596.328	0.0776	83.881	86.1576	96.0955	99.44	601.99	0.06294	27.141
1	64PE449_S02C01	2019-02-03T06:13:42	12.8432	-24.0558	6.4285	6.3753	34.6161	582.521	578.002	34.5509	27.1493	597.524	0.0764	83.953	86.2316	96.0902	99.44	602.75	0.06294	27.1413
1	64PE449_S02C01	2019-02-03T06:13:42	12.8432	-24.0558	6.4285	6.3753	34.6164	583.531	578.997	34.5506	27.149	598.836	0.0786	84.051	86.3322	96.0804	99.44	610.41	0.06294	27.1412
1	64PE449_S02C01	2019-02-03T06:13:42	12.8432	-24.0558	6.4256	6.3723	34.6142	584.54	579.999	34.5505	27.1494	599.991	0.0834	84.291	86.5788	96.0876	99.44	622.6	0.06294	27.1416
1	64PE449_S02C01	2019-02-03T06:13:42	12.8432	-24.0558	6.4217	6.3683	34.6108	585.549	580.997	34.5501	27.1496	601.015	0.0751	84.284	86.5716	96.0753	99.44	626.23	0.06294	27.1418
1	64PE449_S02C01	2019-02-03T06:13:42	12.8432	-24.0558	6.4136	6.3601	34.6033	586.558	582	34.5496	27.1502	601.954	0.0754	84.308	86.5963	96.0837	99.44	620.57	0.06294	27.1424
1	64PE449_S02C01	2019-02-03T06:13:42	12.8432	-24.0558	6.4075	6.354	34.5982	587.568	582.999	34.5495	27.151	602.864	0.0802	84.446	86.7381	96.0772	99.44	609.7	0.06294	27.1431
1	64PE449_S02C01	2019-02-03T06:13:42	12.8432	-24.0558	6.3993	6.3457	34.5909	588.577	584.001	34.5493	27.1519	603.792	0.0773	84.402	86.693	96.0688	99.44	599.6	0.06294	27.1439
1	64PE449_S02C01	2019-02-03T06:13:42	12.8432	-24.0558	6.3926	6.3389	34.5851	589.586	585	34.5492	27.1527	604.754	0.0779	84.423	86.7146	96.0849	99.44	595.59	0.06294	27.1446
1	64PE449_S02C01	2019-02-03T06:13:42	12.8432	-24.0558	6.38	6.3263	34.5733	590.596	586.001	34.5485	27.1538	605.755	0.0807	84.468	86.7609	96.0524	99.44	596.02	0.06294	27.1456
1	64PE449_S02C01	2019-02-03T06:13:42	12.8432	-24.0558	6.368	6.3142	34.5626	591.605	587.002	34.5484	27.1553	606.833	0.0807	84.704	87.0035	96.0808	99.44	598.76	0.06294	27.147
1	64PE449_S02C01	2019-02-03T06:13:42	12.8432	-24.0558	6.3529	6.2992	34.5481	592.614	587.997	34.547	27.1562	607.952	0.0808	84.766	87.0672	96.0886	99.44	598.5	0.06294	27.1478
1	64PE449_S02C01	2019-02-03T06:13:42	12.8432	-24.0558	6.3498	6.2959	34.5454	593.623	588.999	34.5466	27.1563	608.958	0.082	84.968	87.2747	96.1083	99.44	598.59	0.06294	27.1479
1	64PE449_S02C01	2019-02-03T06:13:42	12.8432	-24.0558	6.3445	6.2906	34.5408	594.633	590.002	34.5463	27.1567	609.903	0.0863	85.426	87.7452	96.0699	99.44	604.27	0.06294	27.1484
1	64PE449_S02C01	2019-02-03T06:13:42	12.8432	-24.0558	6.3376	6.2836	34.5346	595.642	591.002	34.5459	27.1573	610.862	0.0822	85.681	88.0072	96.0389	99.44	611.05	0.06294	27.149
1	64PE449_S02C01	2019-02-03T06:13:42	12.8432	-24.0558	6.3262	6.2722	34.524	596.651	592.001	34.5452	27.1582	611.858	0.0755	86.122	88.4602	96.1146	99.44	610.43	0.06294	27.1499
1	64PE449_S02C01	2019-02-03T06:13:42	12.8432	-24.0558	6.3157	6.2616	34.5139	597.661	593.001	34.5441	27.1588	612.901	0.0725	86.679	89.0324	96.1001	99.44	602.88	0.06294	27.1503
1	64PE449_S02C01	2019-02-03T06:13:42	12.8432	-24.0558	6.2963	6.2423	34.4958	598.67	594.001	34.5433	27.1606	614.025	0.0788	87.487	89.8624	96.0939	99.44	600.77	0.06294	27.152
1	64PE449_S02C01	2019-02-03T06:13:42	12.8432	-24.0558	6.2846	6.2304	34.4841	599.679	594.998	34.5416	27.1609	615.236	0.0849	88.012	90.4017	96.0981	99.44	611	0.06294	27.1522
1	64PE449_S02C01	2019-02-03T06:13:42	12.8432	-24.0558	6.2674	6.2132	34.4678	600.689	595.999	34.5405	27.1622	616.356	0.0842	88.25	90.6463	96.0668	99.44	620.15	0.06294	27.1534
1	64PE449_S02C01	2019-02-03T06:13:42	12.8432	-24.0558	6.2529	6.1988	34.4538	601.698	597	34.5391	27.163	617.359	0.085	88.638	91.0449	96.0739	99.44	620.18	0.06294	27.1541
1	64PE449_S02C01	2019-02-03T06:13:42	12.8432	-24.0558	6.247	6.1927	34.4483	602.707	598	34.5383	27.1631	618.38	0.0833	89.016	91.4332	96.0821	99.44	614.13	0.06294	27.1544
1	64PE449_S02C01	2019-02-03T06:13:42	12.8432	-24.0558	6.2279	6.1736	34.431	603.716	598.999	34.5381	27.1654	619.437	0.0722	89.202	91.6244	96.08	99.44	604.5	0.06294	27.1564
1	64PE449_S02C01	2019-02-03T06:13:42	12.8432	-24.0558	6.2091	6.1549	34.4129	604.726	599.999	34.5365	27.1666	620.428	0.0636	89.315	91.7406	96.0815	99.45	599.19	0.06294	27.1575
1	64PE449_S02C01	2019-02-03T06:13:42	12.8432	-24.0558	6.2027	6.1484	34.4069	605.735	600.999	34.5357	27.1668	621.377	0.0714	89.275	91.6995	96.0724	99.44	600.82	0.06294	27.1578
1	64PE449_S02C01	2019-02-03T06:13:42	12.8432	-24.0558	6.1982	6.1438	34.403	606.745	601.999	34.5352	27.1669	622.29	0.0777	89.165	91.5866	96.0419	99.45	602.81	0.06294	27.1581
1	64PE449_S02C01	2019-02-03T06:13:42	12.8432	-24.0558	6.1968	6.1423	34.402	607.754	603.001	34.5348	27.1669	623.181	0.0734	89.132	91.5527	96.0817	99.45	601.66	0.06294	27.1582
1	64PE449_S02C01	2019-02-03T06:13:42	12.8432	-24.0558	6.195	6.1405	34.4008	608.763	604.001	34.5346	27.167	624.099	0.0669	89.112	91.5321	96.0614	99.45	598.13	0.06294	27.1584
1	64PE449_S02C01	2019-02-03T06:13:42	12.8432	-24.0558	6.1902	6.1356	34.397	609.773	605.002	34.5346	27.1676	625.096	0.0684	88.783	91.1943	96.0801	99.45	596.06	0.06294	27.1591
1	64PE449_S02C01	2019-02-03T06:13:42	12.8432	-24.0558	6.1816	6.1268	34.3894	610.782	606.002	34.5344	27.1685	626.156	0.0699	88.644	91.0516	96.0884	99.45	597.18	0.06294	27.1601
1	64PE449_S02C01	2019-02-03T06:13:42	12.8432	-24.0558	6.1732	6.1184	34.3818	611.791	607.001	34.5338	27.1692	627.292	0.0755	88.625	91.0321	96.087	99.44	599.33	0.06294	27.1607
1	64PE449_S02C01	2019-02-03T06:13:42	12.8432	-24.0558	6.1626	6.1077	34.3727	612.801	608.001	34.5339	27.1706	628.528	0.0841	88.354	90.7539	96.096	99.45	605.63	0.06294	27.1621
1	64PE449_S02C01	2019-02-03T06:13:42	12.8432	-24.0558	6.155	6.1001	34.3658	613.81	608.997	34.5333	27.1711	629.791	0.0906	88.336	90.7354	96.0756	99.44	615.49	0.06294	27.1627
1	64PE449_S02C01	2019-02-03T06:13:42	12.8432	-24.0558	6.1531	6.0982	34.3648	614.819	609.999	34.5333	27.1713	630.881	0.0799	88.416	90.8177	96.0868	99.44	620.58	0.06294	27.1631
1	64PE449_S02C01	2019-02-03T06:13:42	12.8432	-24.0558	6.1512	6.0962	34.3634	615.829	610.998	34.5331	27.1715	631.852	0.0747	88.373	90.7735	96.0947	99.45	620.3	0.06294	27.1633
1	64PE449_S02C01	2019-02-03T06:13:42	12.8432	-24.0558	6.1491	6.0939	34.3618	616.838	611.999	34.5329	27.1716	632.765	0.0758	88.414	90.8156	96.0918	99.45	615.69	0.06294	27.1635
1	64PE449_S02C01	2019-02-03T06:13:42	12.8432	-24.0558	6.145	6.0898	34.3585	617.848	613.003	34.5327	27.172	633.698	0.0733	88.449	90.8516	96.0929	99.45	609.74	0.06294	27.1639
1	64PE449_S02C01	2019-02-03T06:13:42	12.8432	-24.0558	6.1423	6.087	34.3563	618.857	614.001	34.5324	27.1721	634.713	0.069	88.471	90.8742	96.093	99.45	604.52	0.06294	27.1641
1	64PE449_S02C01	2019-02-03T06:13:42	12.8432	-24.0558	6.1384	6.083	34.3532	619.867	614.998	34.5324	27.1726	635.724	0.0695	88.443	90.8455	96.0882	99.44	599.45	0.06294	27.1646
1	64PE449_S02C01	2019-02-03T06:13:42	12.8432	-24.0558	6.1379	6.0825	34.3531	620.876	615.999	34.5321	27.1724	636.645	0.0725	88.243	90.6401	96.0942	99.44	596.94	0.06294	27.1645
1	64PE449_S02C01	2019-02-03T06:13:42	12.8432	-24.0558	6.1372	6.0816	34.3528	621.885	617.002	34.532	27.1725	637.538	0.0738	88.321	90.7202	96.0856	99.45	594.65	0.06294	27.1646
1	64PE449_S02C01	2019-02-03T06:13:42	12.8432	-24.0558	6.1367	6.081	34.3528	622.895	618.002	34.5319	27.1725	638.499	0.0692	88.535	90.94	95.9572	99.45	591.7	0.06294	27.1647
1	64PE449_S02C01	2019-02-03T06:13:42	12.8432	-24.0558	6.1334	6.0777	34.3502	623.904	619.003	34.5318	27.1728	639.589	0.0657	88.486	90.8897	96.1019	99.44	591.44	0.06294	27.165
1	64PE449_S02C01	2019-02-03T06:13:42	12.8432	-24.0558	6.1304	6.0746	34.3478	624.914	620	34.5316	27.173	640.836	0.0736	88.441	90.8435	96.0976	99.44	603.33	0.06294	27.1653
1	64PE449_S02C01	2019-02-03T06:13:42	12.8432	-24.0558	6.1297	6.0738	34.3475	625.923	620.997	34.5313	27.1729	642.064	0.0763	88.529	90.9339	96.0883	99.44	620.88	0.06294	27.1653
1	64PE449_S02C01	2019-02-03T06:13:42	12.8432	-24.0558	6.1294	6.0735	34.3478	626.933	622	34.5313	27.173	643.124	0.0809	88.636	91.0438	96.1003	99.44	627.91	0.06294	27.1654
1	64PE449_S02C01	2019-02-03T06:13:42	12.8432	-24.0558	6.1295	6.0734	34.3483	627.942	622.999	34.5313	27.1729	644.142	0.0801	88.577	90.9832	96.0759	99.44	626.31	0.06294	27.1654
1	64PE449_S02C01	2019-02-03T06:13:42	12.8432	-24.0558	6.1296	6.0735	34.3488	628.951	623.999	34.5312	27.1728	645.138	0.0756	88.404	90.8055	96.0998	99.45	620.53	0.06294	27.1653
1	64PE449_S02C01	2019-02-03T06:13:42	12.8432	-24.0558	6.1299	6.0736	34.3495	629.961	624.999	34.5311	27.1728	646.092	0.0753	88.424	90.8261	96.0973	99.44	615.48	0.06294	27.1653
1	64PE449_S02C01	2019-02-03T06:13:42	12.8432	-24.0558	6.1275	6.0712	34.3478	630.97	625.999	34.5311	27.1731	646.997	0.0742	88.533	90.9381	96.095	99.44	608.94	0.06294	27.1656
1	64PE449_S02C01	2019-02-03T06:13:42	12.8432	-24.0558	6.1249	6.0685	34.3457	631.98	627.003	34.531	27.1733	647.887	0.0736	88.542	90.9473	96.0974	99.45	602.1	0.06294	27.1658
1	64PE449_S02C01	2019-02-03T06:13:42	12.8432	-24.0558	6.1212	6.0647	34.3427	632.989	628.003	34.5309	27.1737	648.88	0.0716	88.591	90.9977	96.0982	99.44	600.75	0.06294	27.1661
1	64PE449_S02C01	2019-02-03T06:13:42	12.8432	-24.0558	6.119	6.0624	34.3409	633.999	629	34.5307	27.1739	649.996	0.074	88.626	91.0336	96.0981	99.44	608.12	0.06294	27.1663
1	64PE449_S02C01	2019-02-03T06:13:42	12.8432	-24.0558	6.1156	6.059	34.3381	635.008	629.998	34.5306	27.1742	651.098	0.0794	88.639	91.047	96.0846	99.44	615.86	0.06294	27.1666
1	64PE449_S02C01	2019-02-03T06:13:42	12.8432	-24.0558	6.1126	6.0558	34.3356	636.018	631.001	34.5304	27.1744	652.102	0.0759	88.676	91.085	96.0576	99.44	613.54	0.06294	27.1668
1	64PE449_S02C01	2019-02-03T06:13:42	12.8432	-24.0558	6.107	6.0502	34.331	637.027	632.002	34.5304	27.1752	653.141	0.0856	88.762	91.1734	96.0439	99.45	604.98	0.06294	27.1674
1	64PE449_S02C01	2019-02-03T06:13:42	12.8432	-24.0558	6.0951	6.0383	34.3201	638.037	633.002	34.53	27.1764	654.336	0.08	88.862	91.2762	96.1033	99.44	598.96	0.06294	27.1685
1	64PE449_S02C01	2019-02-03T06:13:42	12.8432	-24.0558	6.0866	6.0297	34.3125	639.046	633.998	34.5297	27.1772	655.649	0.0737	89.344	91.7714	96.0841	99.44	603.67	0.06294	27.1693
1	64PE449_S02C01	2019-02-03T06:13:42	12.8432	-24.0558	6.0806	6.0236	34.3072	640.056	634.996	34.5294	27.1778	656.794	0.0767	90.109	92.5572	96.0957	99.44	614.57	0.06294	27.1698
1	64PE449_S02C01	2019-02-03T06:13:42	12.8432	-24.0558	6.0509	5.9939	34.2802	641.065	635.995	34.5295	27.1816	657.719	0.0788	90.693	93.1574	96.0945	99.44	618.84	0.06294	27.173
1	64PE449_S02C01	2019-02-03T06:13:42	12.8432	-24.0558	6.0223	5.9654	34.2526	642.075	636.997	34.5277	27.1838	658.522	0.0814	91.033	93.5068	96.0991	99.44	614.92	0.06294	27.1747
1	64PE449_S02C01	2019-02-03T06:13:42	12.8432	-24.0558	6.0048	5.948	34.236	643.084	638.004	34.5264	27.185	659.268	0.077	91.138	93.6147	96.0972	99.44	609.37	0.06294	27.1758
1	64PE449_S02C01	2019-02-03T06:13:42	12.8432	-24.0558	5.9849	5.928	34.2174	644.094	639.004	34.5256	27.1869	660.078	0.0744	91.309	93.7905	96.0987	99.45	601.71	0.06294	27.1774
1	64PE449_S02C01	2019-02-03T06:13:42	12.8432	-24.0558	5.9696	5.9127	34.2027	645.103	640.004	34.5241	27.1877	661.027	0.0681	91.411	93.8954	96.0963	99.44	598.07	0.06294	27.1782
1	64PE449_S02C01	2019-02-03T06:13:42	12.8432	-24.0558	5.96	5.9031	34.1937	646.113	641.003	34.523	27.188	662.247	0.0696	91.645	94.1358	96.0849	99.44	606.35	0.06294	27.1786
1	64PE449_S02C01	2019-02-03T06:13:42	12.8432	-24.0558	5.956	5.899	34.1902	647.123	641.996	34.5223	27.1879	663.65	0.0639	91.818	94.3135	96.084	99.44	623.71	0.06294	27.1788
1	64PE449_S02C01	2019-02-03T06:13:42	12.8432	-24.0558	5.9524	5.8954	34.1872	648.132	642.997	34.5217	27.188	664.791	0.0592	91.858	94.3546	96.0964	99.45	627.4	0.06294	27.1791
1	64PE449_S02C01	2019-02-03T06:13:42	12.8432	-24.0558	5.9492	5.892	34.1846	649.142	643.999	34.5215	27.1882	665.773	0.0667	91.946	94.445	96.0935	99.45	623.33	0.06294	27.1795
1	64PE449_S02C01	2019-02-03T06:13:42	12.8432	-24.0558	5.9463	5.8891	34.1822	650.151	644.999	34.5211	27.1883	666.679	0.0695	92.083	94.5858	96.0945	99.44	617.05	0.06294	27.1796
1	64PE449_S02C01	2019-02-03T06:13:42	12.8432	-24.0558	5.944	5.8867	34.1805	651.161	646	34.5209	27.1884	667.549	0.067	92.328	94.8375	96.0958	99.45	611.21	0.06294	27.1798
1	64PE449_S02C01	2019-02-03T06:13:42	12.8432	-24.0558	5.939	5.8815	34.1762	652.17	647.004	34.5206	27.1888	668.441	0.0622	92.699	95.2186	96.0906	99.45	605.34	0.06294	27.1803
1	64PE449_S02C01	2019-02-03T06:13:42	12.8432	-24.0558	5.9317	5.8743	34.17	653.18	648.001	34.5204	27.1896	669.427	0.0643	93.148	95.6799	96.0705	99.45	599.48	0.06294	27.1811
1	64PE449_S02C01	2019-02-03T06:13:42	12.8432	-24.0558	5.9115	5.8541	34.1513	654.189	649.003	34.5198	27.1917	670.526	0.0779	93.649	96.1947	96.099	99.45	596.29	0.06294	27.1829
1	64PE449_S02C01	2019-02-03T06:13:42	12.8432	-24.0558	5.8904	5.833	34.1314	655.199	649.998	34.5186	27.1933	671.713	0.0803	94.64	97.2127	96.0989	99.45	597.78	0.06294	27.1844
1	64PE449_S02C01	2019-02-03T06:13:42	12.8432	-24.0558	5.8748	5.8173	34.1171	656.209	650.999	34.5181	27.1949	672.828	0.0812	95.791	98.3952	96.0807	99.45	606.11	0.06294	27.1858
1	64PE449_S02C01	2019-02-03T06:13:42	12.8432	-24.0558	5.83	5.7727	34.0753	657.218	651.998	34.5168	27.1995	673.824	0.0763	96.42	99.0416	96.084	99.45	611.63	0.06294	27.1897
1	64PE449_S02C01	2019-02-03T06:13:42	12.8432	-24.0558	5.8116	5.7543	34.0571	658.228	652.998	34.5147	27.2001	674.74	0.071	96.736	99.3663	96.076	99.45	611.61	0.06294	27.1902
1	64PE449_S02C01	2019-02-03T06:13:42	12.8432	-24.0558	5.7903	5.733	34.0369	659.237	654.001	34.5133	27.2016	675.629	0.0711	97.19	99.8327	96.0648	99.45	612.15	0.06294	27.1915
1	64PE449_S02C01	2019-02-03T06:13:42	12.8432	-24.0558	5.7806	5.7233	34.028	660.247	655.002	34.5124	27.2021	676.573	0.0721	97.785	100.444	96.0333	99.45	617.14	0.06294	27.1922
1	64PE449_S02C01	2019-02-03T06:13:42	12.8432	-24.0558	5.7711	5.7136	34.0194	661.257	656.001	34.5118	27.2028	677.608	0.0719	98.377	101.052	96.009	99.45	622.31	0.06294	27.193
1	64PE449_S02C01	2019-02-03T06:13:42	12.8432	-24.0558	5.7371	5.6798	33.9883	662.266	657.001	34.511	27.2064	678.725	0.0771	98.628	101.31	95.995	99.46	621.19	0.06294	27.1963
1	64PE449_S02C01	2019-02-03T06:13:42	12.8432	-24.0558	5.7211	5.6638	33.9724	663.276	657.999	34.5088	27.2066	679.905	0.0743	98.697	101.381	95.9911	99.46	615.45	0.06294	27.1966
1	64PE449_S02C01	2019-02-03T06:13:42	12.8432	-24.0558	5.7174	5.66	33.9693	664.285	658.997	34.5081	27.2064	681.054	0.0745	98.933	101.624	95.9764	99.46	611.29	0.06294	27.1968
1	64PE449_S02C01	2019-02-03T06:13:42	12.8432	-24.0558	5.7126	5.6551	33.9654	665.295	659.999	34.5078	27.2068	682.064	0.0681	99.292	101.992	95.9658	99.46	608.18	0.06294	27.1975
1	64PE449_S02C01	2019-02-03T06:13:42	12.8432	-24.0558	5.7058	5.6483	33.9594	666.305	660.998	34.5073	27.2073	682.984	0.0685	99.679	102.39	95.9701	99.46	605.14	0.06294	27.198
1	64PE449_S02C01	2019-02-03T06:13:42	12.8432	-24.0558	5.6957	5.6381	33.9503	667.314	662.003	34.5068	27.2081	683.893	0.0632	100.333	103.062	95.9772	99.46	605.57	0.06294	27.1989
1	64PE449_S02C01	2019-02-03T06:13:42	12.8432	-24.0558	5.6782	5.6206	33.9342	668.324	663.001	34.506	27.2097	684.886	0.0611	100.868	103.612	95.9694	99.47	611.04	0.06294	27.2003
1	64PE449_S02C01	2019-02-03T06:13:42	12.8432	-24.0558	5.6533	5.5958	33.9114	669.334	664.001	34.5053	27.2121	685.949	0.0644	101.28	104.035	95.9556	99.46	616.96	0.06294	27.2026
1	64PE449_S02C01	2019-02-03T06:13:42	12.8432	-24.0558	5.6345	5.577	33.8931	670.343	665	34.5034	27.2129	687.041	0.0635	101.597	104.361	95.9641	99.47	622.28	0.06294	27.2033
1	64PE449_S02C01	2019-02-03T06:13:42	12.8432	-24.0558	5.6248	5.5673	33.8843	671.353	665.998	34.5026	27.2135	688.139	0.0599	102.069	104.846	95.9585	99.47	624.55	0.06294	27.204
1	64PE449_S02C01	2019-02-03T06:13:42	12.8432	-24.0558	5.6063	5.5487	33.867	672.363	666.999	34.5014	27.2149	689.159	0.0697	102.337	105.121	95.9613	99.46	620.08	0.06294	27.2053
1	64PE449_S02C01	2019-02-03T06:13:42	12.8432	-24.0558	5.5975	5.5399	33.8584	673.372	667.998	34.5	27.2148	690.081	0.0653	102.303	105.086	95.9601	99.46	610.98	0.06294	27.2053
1	64PE449_S02C01	2019-02-03T06:13:42	12.8432	-24.0558	5.592	5.5343	33.8535	674.382	669	34.4993	27.215	690.957	0.0623	102.602	105.393	95.9638	99.47	603.18	0.06294	27.2057
1	64PE449_S02C01	2019-02-03T06:13:42	12.8432	-24.0558	5.5856	5.528	33.8481	675.392	670.003	34.499	27.2155	691.86	0.058	102.97	105.771	95.9605	99.47	598.51	0.06294	27.2063
1	64PE449_S02C01	2019-02-03T06:13:42	12.8432	-24.0558	5.5796	5.5218	33.8424	676.401	671.001	34.4981	27.2155	692.861	0.0638	103.267	106.077	95.9728	99.47	602.59	0.06294	27.2065
1	64PE449_S02C01	2019-02-03T06:13:42	12.8432	-24.0558	5.5742	5.5164	33.8375	677.411	672.002	34.4973	27.2155	693.942	0.0723	103.691	106.512	95.9729	99.47	611.67	0.06294	27.2067
1	64PE449_S02C01	2019-02-03T06:13:42	12.8432	-24.0558	5.5663	5.5085	33.8304	678.421	673.001	34.4967	27.216	695.115	0.0699	104.382	107.222	95.9712	99.47	618.72	0.06294	27.2072
1	64PE449_S02C01	2019-02-03T06:13:42	12.8432	-24.0558	5.553	5.4951	33.8178	679.43	673.998	34.4955	27.2167	696.349	0.0764	105.514	108.385	95.9842	99.47	622.84	0.06294	27.2079
1	64PE449_S02C01	2019-02-03T06:13:42	12.8432	-24.0558	5.5349	5.4769	33.8007	680.44	674.997	34.4943	27.2179	697.452	0.0696	106.231	109.121	95.9908	99.48	625.25	0.06294	27.209
1	64PE449_S02C01	2019-02-03T06:13:42	12.8432	-24.0558	5.5039	5.4461	33.7719	681.45	675.998	34.4931	27.2207	698.42	0.0566	106.381	109.276	96.0125	99.48	626.31	0.06294	27.2114
1	64PE449_S02C01	2019-02-03T06:13:42	12.8432	-24.0558	5.4832	5.4255	33.7519	682.46	677	34.4913	27.2218	699.316	0.0596	106.384	109.279	96.0395	99.47	620.74	0.06294	27.2123
1	64PE449_S02C01	2019-02-03T06:13:42	12.8432	-24.0558	5.4752	5.4173	33.7443	683.469	678.003	34.4903	27.222	700.199	0.0611	106.376	109.271	96.0494	99.48	615.47	0.06294	27.2125
1	64PE449_S02C01	2019-02-03T06:13:42	12.8432	-24.0558	5.4712	5.4133	33.7411	684.479	679.002	34.4899	27.2221	701.174	0.0677	106.485	109.383	96.0579	99.49	615.1	0.06294	27.2129
1	64PE449_S02C01	2019-02-03T06:13:42	12.8432	-24.0558	5.4673	5.4093	33.7379	685.489	680	34.4894	27.2222	702.264	0.0705	106.602	109.503	96.0714	99.49	619.58	0.06294	27.2132
1	64PE449_S02C01	2019-02-03T06:13:42	12.8432	-24.0558	5.4642	5.4061	33.7355	686.499	680.997	34.4891	27.2223	703.345	0.0706	106.896	109.805	96.0678	99.49	624.91	0.06294	27.2136
1	64PE449_S02C01	2019-02-03T06:13:42	12.8432	-24.0558	5.4576	5.3994	33.7298	687.508	681.998	34.4889	27.223	704.293	0.0661	107.26	110.179	96.0619	99.49	625.51	0.06294	27.2142
1	64PE449_S02C01	2019-02-03T06:13:42	12.8432	-24.0558	5.445	5.3869	33.7186	688.518	683.002	34.4884	27.2242	705.192	0.0633	107.394	110.317	96.0465	99.49	622.72	0.06294	27.2154
1	64PE449_S02C01	2019-02-03T06:13:42	12.8432	-24.0558	5.4379	5.3797	33.7119	689.528	684.002	34.4876	27.2244	706.154	0.0644	107.367	110.289	96.0644	99.49	615.65	0.06294	27.2156
1	64PE449_S02C01	2019-02-03T06:13:42	12.8432	-24.0558	5.4319	5.3736	33.7069	690.537	685.001	34.4874	27.2249	707.229	0.0688	107.651	110.581	96.071	99.49	603.38	0.06294	27.2163
1	64PE449_S02C01	2019-02-03T06:13:42	12.8432	-24.0558	5.4221	5.3638	33.6982	691.547	685.999	34.4869	27.2257	708.406	0.0711	108.061	111.002	96.063	99.49	598.19	0.06294	27.2171
1	64PE449_S02C01	2019-02-03T06:13:42	12.8432	-24.0558	5.4136	5.3552	33.6905	692.557	686.998	34.4864	27.2263	709.502	0.0619	108.5	111.453	96.0448	99.5	602.34	0.06294	27.2177
1	64PE449_S02C01	2019-02-03T06:13:42	12.8432	-24.0558	5.4052	5.3468	33.683	693.567	687.998	34.4858	27.2268	710.477	0.0557	109.165	112.136	96.0669	99.49	603	0.06294	27.2183
1	64PE449_S02C01	2019-02-03T06:13:42	12.8432	-24.0558	5.4019	5.3433	33.68	694.577	689.001	34.4853	27.2269	711.401	0.0534	109.657	112.642	96.0861	99.49	603.12	0.06294	27.2183
1	64PE449_S02C01	2019-02-03T06:13:42	12.8432	-24.0558	5.3817	5.3234	33.6617	695.586	690	34.4847	27.2288	712.331	0.0594	110.082	113.078	96.0718	99.49	606.8	0.06294	27.2202
1	64PE449_S02C01	2019-02-03T06:13:42	12.8432	-24.0558	5.3636	5.3052	33.6442	696.596	691.002	34.483	27.2296	713.313	0.0581	110.549	113.558	96.0778	99.49	612.02	0.06294	27.2208
1	64PE449_S02C01	2019-02-03T06:13:42	12.8432	-24.0558	5.3513	5.2929	33.6329	697.606	692.001	34.4823	27.2305	714.361	0.0541	111.177	114.203	96.0836	99.5	618.52	0.06294	27.2216
1	64PE449_S02C01	2019-02-03T06:13:42	12.8432	-24.0558	5.3378	5.2794	33.6203	698.616	693.001	34.4812	27.2312	715.505	0.0555	111.573	114.61	96.0944	99.49	625.33	0.06294	27.2223
1	64PE449_S02C01	2019-02-03T06:13:42	12.8432	-24.0558	5.3224	5.2639	33.6057	699.626	693.997	34.48	27.2321	716.661	0.0626	111.626	114.665	96.0986	99.5	631.6	0.06294	27.2231
1	64PE449_S02C01	2019-02-03T06:13:42	12.8432	-24.0558	5.3175	5.2589	33.6013	700.635	694.998	34.4792	27.2321	717.663	0.0572	111.704	114.745	96.105	99.5	629.71	0.06294	27.2233
1	64PE449_S02C01	2019-02-03T06:13:42	12.8432	-24.0558	5.3143	5.2557	33.5989	701.645	695.999	34.479	27.2323	718.555	0.0622	111.719	114.76	96.1053	99.5	620.87	0.06294	27.2237
1	64PE449_S02C01	2019-02-03T06:13:42	12.8432	-24.0558	5.3044	5.2457	33.5907	702.655	697.003	34.4794	27.2338	719.45	0.0651	111.961	115.009	96.1109	99.5	611.38	0.06294	27.2252
1	64PE449_S02C01	2019-02-03T06:13:42	12.8432	-24.0558	5.2969	5.2382	33.5841	703.665	698.003	34.4789	27.2343	720.46	0.0606	112.533	115.597	96.1004	99.5	605.1	0.06294	27.2256
1	64PE449_S02C01	2019-02-03T06:13:42	12.8432	-24.0558	5.2861	5.2274	33.5742	704.675	699	34.4781	27.2349	721.616	0.0645	113.157	116.238	96.1053	99.5	606.01	0.06294	27.2263
1	64PE449_S02C01	2019-02-03T06:13:42	12.8432	-24.0558	5.2742	5.2155	33.5632	705.684	699.997	34.4773	27.2357	722.75	0.0692	113.284	116.368	96.0544	99.5	606.24	0.06294	27.2271
1	64PE449_S02C01	2019-02-03T06:13:42	12.8432	-24.0558	5.2592	5.2005	33.5497	706.694	700.999	34.4768	27.2371	723.755	0.0674	113.121	116.201	96.0899	99.5	603.77	0.06294	27.2283
1	64PE449_S02C01	2019-02-03T06:13:42	12.8432	-24.0558	5.2468	5.188	33.5389	707.704	701.999	34.4768	27.2385	724.718	0.059	113.11	116.19	96.1051	99.5	601.69	0.06294	27.2298
1	64PE449_S02C01	2019-02-03T06:13:42	12.8432	-24.0558	5.2337	5.1749	33.5277	708.714	703	34.4769	27.2402	725.66	0.0567	113.062	116.141	96.1049	99.51	603.8	0.06294	27.2313
1	64PE449_S02C01	2019-02-03T06:13:42	12.8432	-24.0558	5.2273	5.1685	33.5224	709.724	703.999	34.4768	27.2408	726.573	0.0569	113.276	116.361	96.1005	99.51	610.38	0.06294	27.232
1	64PE449_S02C01	2019-02-03T06:13:42	12.8432	-24.0558	5.2211	5.1623	33.5169	710.734	704.998	34.4762	27.2411	727.455	0.0594	113.672	116.768	96.095	99.5	615.53	0.06294	27.2324
1	64PE449_S02C01	2019-02-03T06:13:42	12.8432	-24.0558	5.2186	5.1596	33.5149	711.743	706.003	34.4759	27.2411	728.338	0.0604	113.879	116.98	96.075	99.51	617.63	0.06294	27.2326
1	64PE449_S02C01	2019-02-03T06:13:42	12.8432	-24.0558	5.2107	5.1517	33.508	712.753	707.003	34.4755	27.2418	729.328	0.0603	113.976	117.08	96.0822	99.51	622.47	0.06294	27.2333
1	64PE449_S02C01	2019-02-03T06:13:42	12.8432	-24.0558	5.2019	5.1429	33.4999	713.763	708.002	34.4746	27.2421	730.498	0.0596	113.927	117.03	96.0935	99.51	628.75	0.06294	27.2336
1	64PE449_S02C01	2019-02-03T06:13:42	12.8432	-24.0558	5.1991	5.14	33.4977	714.773	708.998	34.4743	27.2422	731.746	0.0621	113.755	116.853	96.0946	99.51	625.62	0.06294	27.2339
1	64PE449_S02C01	2019-02-03T06:13:42	12.8432	-24.0558	5.1911	5.1319	33.4914	715.783	709.996	34.4749	27.2436	732.853	0.0665	114.025	117.131	96.0959	99.51	617.11	0.06294	27.2353
1	64PE449_S02C01	2019-02-03T06:13:42	12.8432	-24.0558	5.1761	5.1169	33.4787	716.793	711.002	34.4753	27.2457	733.872	0.0695	114.405	117.521	96.0805	99.51	611.48	0.06294	27.2372
1	64PE449_S02C01	2019-02-03T06:13:42	12.8432	-24.0558	5.1679	5.1087	33.4713	717.803	712.001	34.4748	27.2462	734.878	0.0597	114.627	117.749	96.0934	99.51	613.7	0.06294	27.2378
1	64PE449_S02C01	2019-02-03T06:13:42	12.8432	-24.0558	5.157	5.0977	33.4616	718.813	712.999	34.4744	27.2472	735.891	0.0529	114.812	117.939	96.1024	99.51	618.74	0.06294	27.2387
1	64PE449_S02C01	2019-02-03T06:13:42	12.8432	-24.0558	5.1418	5.0826	33.4483	719.822	713.998	34.4744	27.2489	736.843	0.0518	114.8	117.927	96.0932	99.51	616.72	0.06294	27.2404
1	64PE449_S02C01	2019-02-03T06:13:42	12.8432	-24.0558	5.1355	5.0762	33.4426	720.832	714.999	34.4737	27.2492	737.735	0.0581	114.775	117.902	96.0924	99.51	610.75	0.06294	27.2406
1	64PE449_S02C01	2019-02-03T06:13:42	12.8432	-24.0558	5.1348	5.0753	33.4422	721.842	715.999	34.4733	27.2489	738.599	0.0627	114.786	117.913	96.0639	99.51	605.05	0.06294	27.2405
1	64PE449_S02C01	2019-02-03T06:13:42	12.8432	-24.0558	5.1345	5.075	33.4424	722.852	717.004	34.4731	27.2488	739.486	0.0596	114.809	117.936	96.0778	99.51	600.61	0.06294	27.2406
1	64PE449_S02C01	2019-02-03T06:13:42	12.8432	-24.0558	5.1344	5.0748	33.4429	723.862	718.002	34.4731	27.2488	740.48	0.0605	114.772	117.898	96.0887	99.51	598.07	0.06294	27.2407
1	64PE449_S02C01	2019-02-03T06:13:42	12.8432	-24.0558	5.1343	5.0747	33.4432	724.872	719.002	34.4727	27.2486	741.577	0.062	114.698	117.822	96.0849	99.51	602.21	0.06294	27.2407
1	64PE449_S02C01	2019-02-03T06:13:42	12.8432	-24.0558	5.1344	5.0746	33.4437	725.882	720.002	34.4726	27.2485	742.791	0.0646	114.737	117.863	96.0732	99.51	615.25	0.06294	27.2407
1	64PE449_S02C01	2019-02-03T06:13:42	12.8432	-24.0558	5.135	5.0751	33.4448	726.892	720.997	34.4725	27.2483	744.097	0.0656	114.855	117.984	96.0538	99.52	629.43	0.06294	27.2407
1	64PE449_S02C01	2019-02-03T06:13:42	12.8432	-24.0558	5.1353	5.0754	33.4455	727.902	721.998	34.4724	27.2482	745.278	0.0605	114.837	117.965	96.0927	99.51	633.69	0.06294	27.2407
1	64PE449_S02C01	2019-02-03T06:13:42	12.8432	-24.0558	5.1357	5.0756	33.4463	728.912	722.996	34.4724	27.2482	746.273	0.0597	114.875	118.004	96.0962	99.51	628.74	0.06294	27.2407
1	64PE449_S02C01	2019-02-03T06:13:42	12.8432	-24.0558	5.1357	5.0757	33.4468	729.922	723.999	34.4723	27.2481	747.166	0.0604	114.885	118.015	96.1011	99.51	627.52	0.06294	27.2407
1	64PE449_S02C01	2019-02-03T06:13:42	12.8432	-24.0558	5.1353	5.075	33.4469	730.932	725.002	34.4723	27.2482	748.04	0.0631	114.891	118.021	96.0971	99.52	629.19	0.06294	27.2408
1	64PE449_S02C01	2019-02-03T06:13:42	12.8432	-24.0558	5.1333	5.0731	33.4457	731.942	725.999	34.4723	27.2484	748.959	0.0587	114.935	118.066	96.0909	99.52	629.05	0.06294	27.241
1	64PE449_S02C01	2019-02-03T06:13:42	12.8432	-24.0558	5.1302	5.0699	33.4434	732.951	726.998	34.4724	27.2489	749.852	0.0626	115.093	118.228	96.0949	99.51	623.12	0.06294	27.2414
1	64PE449_S02C01	2019-02-03T06:13:42	12.8432	-24.0558	5.1256	5.0652	33.4396	733.962	728.001	34.4724	27.2494	750.699	0.0632	115.301	118.442	96.0593	99.52	614.02	0.06294	27.242
1	64PE449_S02C01	2019-02-03T06:13:42	12.8432	-24.0558	5.1178	5.0573	33.433	734.971	729.003	34.4726	27.2504	751.587	0.064	115.407	118.551	96.0426	99.51	604.69	0.06294	27.2428
1	64PE449_S02C01	2019-02-03T06:13:42	12.8432	-24.0558	5.1048	5.0444	33.4217	735.981	730.003	34.4726	27.252	752.606	0.0675	115.535	118.683	95.9432	99.51	597.56	0.06294	27.2441
1	64PE449_S02C01	2019-02-03T06:13:42	12.8432	-24.0558	5.0977	5.0372	33.4153	736.991	731.003	34.4721	27.2525	753.83	0.0654	115.558	118.706	96.0693	99.52	600.65	0.06294	27.2446
1	64PE449_S02C01	2019-02-03T06:13:42	12.8432	-24.0558	5.0928	5.0323	33.4111	738.001	731.996	34.4718	27.2527	755.192	0.0618	115.521	118.668	96.0824	99.51	616.35	0.06294	27.2449
1	64PE449_S02C01	2019-02-03T06:13:42	12.8432	-24.0558	5.0915	5.0309	33.4104	739.011	732.997	34.4717	27.2528	756.311	0.0594	115.895	119.053	96.0944	99.52	623.8	0.06294	27.2451
1	64PE449_S02C01	2019-02-03T06:13:42	12.8432	-24.0558	5.089	5.0283	33.4087	740.021	733.999	34.4717	27.2531	757.275	0.0596	115.863	119.02	96.0942	99.51	626.86	0.06294	27.2454
1	64PE449_S02C01	2019-02-03T06:13:42	12.8432	-24.0558	5.0852	5.0244	33.4056	741.031	735	34.4716	27.2535	758.175	0.0617	115.982	119.142	96.0924	99.51	629.14	0.06294	27.2458
1	64PE449_S02C01	2019-02-03T06:13:42	12.8432	-24.0558	5.081	5.0201	33.4023	742.041	736.002	34.4717	27.2541	759.085	0.0624	116.483	119.657	96.0973	99.51	631.25	0.06294	27.2463
1	64PE449_S02C01	2019-02-03T06:13:42	12.8432	-24.0558	5.073	5.0121	33.3953	743.051	737.002	34.4715	27.2548	760.054	0.0617	116.5	119.674	96.0951	99.51	629.27	0.06294	27.247
1	64PE449_S02C01	2019-02-03T06:13:42	12.8432	-24.0558	5.0581	4.9972	33.3817	744.061	738.002	34.4709	27.2561	761.069	0.0581	116.242	119.409	96.093	99.51	624.92	0.06294	27.248
1	64PE449_S02C01	2019-02-03T06:13:42	12.8432	-24.0558	5.0502	4.9893	33.3753	745.071	739	34.4712	27.2572	762.144	0.0586	115.96	119.12	96.0943	99.51	620.3	0.06294	27.2491
1	64PE449_S02C01	2019-02-03T06:13:42	12.8432	-24.0558	5.0498	4.9887	33.3758	746.081	739.997	34.4716	27.2576	763.238	0.0602	116.281	119.45	96.0915	99.51	614.99	0.06294	27.2496
1	64PE449_S02C01	2019-02-03T06:13:42	12.8432	-24.0558	5.0443	4.9832	33.3718	747.091	740.999	34.4722	27.2587	764.229	0.0637	116.917	120.103	96.0793	99.51	609.89	0.06294	27.2507
1	64PE449_S02C01	2019-02-03T06:13:42	12.8432	-24.0558	5.0312	4.9701	33.3604	748.102	741.998	34.4722	27.2602	765.119	0.0594	117.049	120.239	96.081	99.51	608.29	0.06294	27.252
1	64PE449_S02C01	2019-02-03T06:13:42	12.8432	-24.0558	5.0056	4.9446	33.3374	749.111	743.002	34.4721	27.2631	765.974	0.0629	117.255	120.451	96.0902	99.52	608.27	0.06294	27.2545
1	64PE449_S02C01	2019-02-03T06:13:42	12.8432	-24.0558	4.9984	4.9373	33.3305	750.122	744.003	34.4711	27.2631	766.893	0.064	117.187	120.381	96.0971	99.52	609.21	0.06294	27.2545
1	64PE449_S02C01	2019-02-03T06:13:42	12.8432	-24.0558	4.9933	4.9322	33.3262	751.132	745.002	34.4707	27.2634	767.929	0.0579	117.34	120.538	96.0989	99.52	613.22	0.06294	27.2549
1	64PE449_S02C01	2019-02-03T06:13:42	12.8432	-24.0558	4.9899	4.9287	33.3235	752.142	746	34.4704	27.2636	769.046	0.0584	117.669	120.876	96.1051	99.52	620.97	0.06294	27.2552
1	64PE449_S02C01	2019-02-03T06:13:42	12.8432	-24.0558	4.9842	4.9229	33.3188	753.152	746.999	34.4703	27.2641	770.104	0.0604	117.848	121.06	96.1149	99.52	629.72	0.06294	27.2558
1	64PE449_S02C01	2019-02-03T06:13:42	12.8432	-24.0558	4.9767	4.9154	33.3122	754.162	748.003	34.4698	27.2646	771.173	0.0584	117.838	121.05	96.1017	99.52	633.47	0.06294	27.2563
1	64PE449_S02C01	2019-02-03T06:13:42	12.8432	-24.0558	4.9737	4.9123	33.3098	755.172	748.999	34.4695	27.2647	772.36	0.0677	118.235	121.458	96.102	99.52	630.6	0.06294	27.2565
1	64PE449_S02C01	2019-02-03T06:13:42	12.8432	-24.0558	4.9687	4.9072	33.3059	756.182	749.997	34.4697	27.2655	773.494	0.0622	118.384	121.611	96.109	99.52	624.83	0.06294	27.2573
1	64PE449_S02C01	2019-02-03T06:13:42	12.8432	-24.0558	4.9521	4.8907	33.2914	757.192	750.998	34.4698	27.2675	774.483	0.0531	118.397	121.624	96.1068	99.52	620.91	0.06294	27.2591
1	64PE449_S02C01	2019-02-03T06:13:42	12.8432	-24.0558	4.9411	4.8797	33.2818	758.202	751.999	34.4696	27.2686	775.39	0.0548	118.424	121.652	96.1027	99.52	617.04	0.06294	27.2601
1	64PE449_S02C01	2019-02-03T06:13:42	12.8432	-24.0558	4.9355	4.874	33.2771	759.212	753.001	34.4695	27.2691	776.26	0.0551	118.507	121.738	96.1032	99.53	613.43	0.06294	27.2607
1	64PE449_S02C01	2019-02-03T06:13:42	12.8432	-24.0558	4.9337	4.8721	33.2759	760.222	754.002	34.4693	27.2691	777.145	0.0625	118.373	121.6	96.0994	99.52	612.94	0.06294	27.2608
1	64PE449_S02C01	2019-02-03T06:13:42	12.8432	-24.0558	4.9319	4.8703	33.2748	761.232	755.002	34.4691	27.2692	778.115	0.0662	118.36	121.587	96.0997	99.52	613.13	0.06294	27.261
1	64PE449_S02C01	2019-02-03T06:13:42	12.8432	-24.0558	4.93	4.8682	33.2736	762.242	756.002	34.4691	27.2694	779.184	0.0605	118.313	121.538	96.0868	99.53	615.38	0.06294	27.2614
1	64PE449_S02C01	2019-02-03T06:13:42	12.8432	-24.0558	4.9283	4.8665	33.2726	763.253	756.998	34.469	27.2696	780.346	0.0629	118.429	121.658	96.0953	99.52	620.91	0.06294	27.2616
1	64PE449_S02C01	2019-02-03T06:13:42	12.8432	-24.0558	4.9249	4.863	33.2701	764.263	757.996	34.4691	27.27	781.422	0.0568	118.553	121.785	96.1007	99.52	618.58	0.06294	27.2621
1	64PE449_S02C01	2019-02-03T06:13:42	12.8432	-24.0558	4.9225	4.8605	33.2683	765.273	758.999	34.469	27.2702	782.372	0.0573	118.552	121.784	96.1178	99.53	616.34	0.06294	27.2624
1	64PE449_S02C01	2019-02-03T06:13:42	12.8432	-24.0558	4.9144	4.8524	33.2619	766.283	760.002	34.4695	27.2716	783.279	0.0601	118.674	121.909	96.0984	99.53	616.32	0.06294	27.2636
1	64PE449_S02C01	2019-02-03T06:13:42	12.8432	-24.0558	4.9045	4.8424	33.2535	767.293	761.001	34.4696	27.2728	784.249	0.0631	118.917	122.159	96.1042	99.52	620.66	0.06294	27.2647
1	64PE449_S02C01	2019-02-03T06:13:42	12.8432	-24.0558	4.8924	4.8304	33.2435	768.303	761.999	34.4701	27.2745	785.268	0.0604	118.657	121.892	96.1055	99.52	626.27	0.06294	27.2663
1	64PE449_S02C01	2019-02-03T06:13:42	12.8432	-24.0558	4.8906	4.8285	33.2421	769.313	762.999	34.4698	27.2745	786.212	0.0559	118.446	121.676	96.1033	99.52	623.73	0.06294	27.2664
1	64PE449_S02C01	2019-02-03T06:13:42	12.8432	-24.0558	4.8852	4.823	33.2379	770.323	764.003	34.47	27.2753	787.124	0.0566	118.475	121.705	96.0943	99.52	620.92	0.06294	27.2672
1	64PE449_S02C01	2019-02-03T06:13:42	12.8432	-24.0558	4.881	4.8187	33.2347	771.334	765.003	34.47	27.2758	788.157	0.0552	118.639	121.874	96.0931	99.52	621.33	0.06294	27.2678
1	64PE449_S02C01	2019-02-03T06:13:42	12.8432	-24.0558	4.8756	4.8133	33.2304	772.344	766	34.4702	27.2765	789.353	0.054	118.548	121.781	96.1048	99.53	625.83	0.06294	27.2685
1	64PE449_S02C01	2019-02-03T06:13:42	12.8432	-24.0558	4.8713	4.8089	33.2272	773.354	766.997	34.4703	27.2771	790.555	0.0559	118.551	121.784	96.0725	99.53	619.93	0.06294	27.2691
1	64PE449_S02C01	2019-02-03T06:13:42	12.8432	-24.0558	4.8685	4.8061	33.2252	774.364	767.996	34.4703	27.2774	791.552	0.0532	118.468	121.699	96.0942	99.53	608.98	0.06294	27.2695
1	64PE449_S02C01	2019-02-03T06:13:42	12.8432	-24.0558	4.8655	4.803	33.2229	775.374	769.001	34.4701	27.2777	792.444	0.053	118.664	121.9	96.0896	99.53	602.33	0.06294	27.2697
1	64PE449_S02C01	2019-02-03T06:13:42	12.8432	-24.0558	4.8642	4.8016	33.2221	776.384	770.003	34.47	27.2777	793.348	0.0505	118.705	121.942	96.0577	99.53	600.97	0.06294	27.2698
1	64PE449_S02C01	2019-02-03T06:13:42	12.8432	-24.0558	4.8631	4.8005	33.2216	777.394	771.001	34.4699	27.2778	794.347	0.0561	118.759	121.998	96.0959	99.52	604.8	0.06294	27.27
1	64PE449_S02C01	2019-02-03T06:13:42	12.8432	-24.0558	4.862	4.7993	33.2211	778.405	771.998	34.4699	27.2779	795.398	0.058	118.812	122.052	96.043	99.53	614.38	0.06294	27.2702
1	64PE449_S02C01	2019-02-03T06:13:42	12.8432	-24.0558	4.8601	4.7973	33.22	779.415	772.999	34.47	27.2782	796.395	0.0588	118.516	121.748	96.0626	99.51	628.83	0.06294	27.2705
1	64PE449_S02C01	2019-02-03T06:13:42	12.8432	-24.0558	4.8584	4.7955	33.2188	780.425	774.002	34.4699	27.2783	797.364	0.0593	118.555	121.788	96.0899	99.52	637.19	0.06294	27.2707
1	64PE449_S02C01	2019-02-03T06:13:42	12.8432	-24.0558	4.8563	4.7934	33.2176	781.435	775.002	34.47	27.2787	798.413	0.0525	118.698	121.935	96.0802	99.52	637.85	0.06294	27.271
1	64PE449_S02C01	2019-02-03T06:13:42	12.8432	-24.0558	4.8532	4.7902	33.2154	782.445	776	34.4702	27.2792	799.527	0.0584	118.694	121.931	96.096	99.53	633	0.06294	27.2716
1	64PE449_S02C01	2019-02-03T06:13:42	12.8432	-24.0558	4.8511	4.788	33.2139	783.456	776.997	34.4701	27.2794	800.628	0.0572	118.629	121.864	95.9905	99.52	627.58	0.06294	27.2718
1	64PE449_S02C01	2019-02-03T06:13:42	12.8432	-24.0558	4.8493	4.7861	33.2127	784.466	777.997	34.47	27.2795	801.6	0.0513	118.768	122.007	96.0722	99.52	618.47	0.06294	27.2718
1	64PE449_S02C01	2019-02-03T06:13:42	12.8432	-24.0558	4.8483	4.785	33.2122	785.476	779	34.47	27.2796	802.481	0.0533	118.756	121.995	96.0962	99.52	607.46	0.06294	27.272
1	64PE449_S02C01	2019-02-03T06:13:42	12.8432	-24.0558	4.8466	4.7833	33.2112	786.486	780.003	34.47	27.2798	803.338	0.0566	118.725	121.963	96.1016	99.52	601.39	0.06294	27.2722
1	64PE449_S02C01	2019-02-03T06:13:42	12.8432	-24.0558	4.8448	4.7814	33.21	787.496	781.002	34.47	27.28	804.261	0.0516	118.837	122.078	96.1019	99.52	602.32	0.06294	27.2724
1	64PE449_S02C01	2019-02-03T06:13:42	12.8432	-24.0558	4.8439	4.7804	33.2097	788.507	782.004	34.4701	27.2802	805.309	0.0498	118.688	121.925	96.1055	99.52	611.92	0.06294	27.2726
1	64PE449_S02C01	2019-02-03T06:13:42	12.8432	-24.0558	4.8427	4.7791	33.209	789.517	782.999	34.47	27.2802	806.499	0.0497	118.746	121.985	96.1007	99.52	622.39	0.06294	27.2727
1	64PE449_S02C01	2019-02-03T06:13:42	12.8432	-24.0558	4.841	4.7773	33.2078	790.527	783.997	34.4699	27.2803	807.644	0.0547	118.757	121.996	96.1025	99.52	628.14	0.06294	27.2728
1	64PE449_S02C01	2019-02-03T06:13:42	12.8432	-24.0558	4.8401	4.7764	33.2076	791.537	784.998	34.47	27.2805	808.625	0.05	118.91	122.153	96.0939	99.52	630.39	0.06294	27.273
1	64PE449_S02C01	2019-02-03T06:13:42	12.8432	-24.0558	4.8391	4.7753	33.2071	792.548	786	34.4699	27.2806	809.545	0.0525	119.024	122.27	96.095	99.52	630.35	0.06294	27.2731
1	64PE449_S02C01	2019-02-03T06:13:42	12.8432	-24.0558	4.8389	4.7749	33.2073	793.558	787.002	34.4697	27.2805	810.471	0.0525	119.073	122.32	96.0857	99.53	628.15	0.06294	27.273
1	64PE449_S02C01	2019-02-03T06:13:42	12.8432	-24.0558	4.8354	4.7715	33.2048	794.568	788.001	34.47	27.2811	811.465	0.0579	119.21	122.461	96.0889	99.52	625.77	0.06294	27.2736
1	64PE449_S02C01	2019-02-03T06:13:42	12.8432	-24.0558	4.8315	4.7674	33.2019	795.578	789.002	34.4702	27.2818	812.536	0.0627	119.401	122.658	96.0866	99.52	621.64	0.06294	27.2741
1	64PE449_S02C01	2019-02-03T06:13:42	12.8432	-24.0558	4.8182	4.7542	33.1907	796.589	790	34.4708	27.2837	813.659	0.0623	119.812	123.08	96.0846	99.53	611.78	0.06294	27.2759
1	64PE449_S02C01	2019-02-03T06:13:42	12.8432	-24.0558	4.7987	4.7347	33.1734	797.599	791	34.4708	27.2859	814.819	0.0637	120.013	123.287	96.0919	99.52	605.22	0.06294	27.2777
1	64PE449_S02C01	2019-02-03T06:13:42	12.8432	-24.0558	4.7832	4.7192	33.1596	798.609	791.997	34.4706	27.2874	815.958	0.0539	120.069	123.344	96.0858	99.52	610.41	0.06294	27.279
1	64PE449_S02C01	2019-02-03T06:13:42	12.8432	-24.0558	4.7756	4.7116	33.1528	799.619	792.997	34.4701	27.288	816.955	0.0532	120.153	123.431	96.0703	99.52	617.91	0.06294	27.2796
1	64PE449_S02C01	2019-02-03T06:13:42	12.8432	-24.0558	4.7713	4.7073	33.1495	800.63	793.998	34.4701	27.2884	817.839	0.059	120.114	123.391	96.0761	99.52	618.31	0.06294	27.2801
1	64PE449_S02C01	2019-02-03T06:13:42	12.8432	-24.0558	4.7695	4.7053	33.1486	801.64	794.999	34.4704	27.2889	818.648	0.0658	120.073	123.349	96.0944	99.52	616.64	0.06294	27.2806
1	64PE449_S02C01	2019-02-03T06:13:42	12.8432	-24.0558	4.7675	4.7032	33.1474	802.65	796.002	34.4704	27.2892	819.438	0.0662	120.208	123.487	96.0836	99.54	616.18	0.06294	27.2809
1	64PE449_S02C01	2019-02-03T06:13:42	12.8432	-24.0558	4.766	4.7017	33.1464	803.661	797.003	34.4703	27.2892	820.291	0.0652	120.303	123.585	96.0801	99.52	617.14	0.06294	27.281
1	64PE449_S02C01	2019-02-03T06:13:42	12.8432	-24.0558	4.7619	4.6975	33.1435	804.671	798.001	34.4706	27.2899	821.227	0.0648	120.372	123.656	96.0897	99.52	618.48	0.06294	27.2817
1	64PE449_S02C01	2019-02-03T06:13:42	12.8432	-24.0558	4.7554	4.691	33.1383	805.681	799.003	34.4708	27.2908	822.275	0.0598	120.513	123.801	96.0989	99.52	622.51	0.06294	27.2826
1	64PE449_S02C01	2019-02-03T06:13:42	12.8432	-24.0558	4.7468	4.6823	33.1311	806.692	800.002	34.4709	27.2918	823.486	0.0558	120.821	124.117	96.0962	99.53	633.19	0.06294	27.2836
1	64PE449_S02C01	2019-02-03T06:13:42	12.8432	-24.0558	4.7294	4.6649	33.1161	807.702	800.999	34.4712	27.2941	824.851	0.0568	121.35	124.661	96.0715	99.53	637.41	0.06294	27.2856
1	64PE449_S02C01	2019-02-03T06:13:42	12.8432	-24.0558	4.7196	4.6551	33.1074	808.712	801.997	34.4708	27.2948	826.131	0.0563	121.648	124.967	96.0844	99.53	627.64	0.06294	27.2864
1	64PE449_S02C01	2019-02-03T06:13:42	12.8432	-24.0558	4.7049	4.6404	33.0943	809.722	802.997	34.4705	27.2962	827.222	0.0662	121.956	125.284	96.0637	99.53	621.02	0.06294	27.2876
1	64PE449_S02C01	2019-02-03T06:13:42	12.8432	-24.0558	4.6935	4.6291	33.0843	810.733	803.996	34.4702	27.2972	828.16	0.0575	122.065	125.396	96.0767	99.53	614.29	0.06294	27.2886
1	64PE449_S02C01	2019-02-03T06:13:42	12.8432	-24.0558	4.6907	4.6262	33.0818	811.743	804.998	34.4696	27.2971	828.986	0.0512	122.111	125.443	96.0753	99.53	604.74	0.06294	27.2885
1	64PE449_S02C01	2019-02-03T06:13:42	12.8432	-24.0558	4.6896	4.6249	33.0811	812.754	806.003	34.4693	27.297	829.764	0.0481	122.23	125.565	96.0731	99.53	598.84	0.06294	27.2885
1	64PE449_S02C01	2019-02-03T06:13:42	12.8432	-24.0558	4.6876	4.6228	33.0797	813.764	807.003	34.4691	27.2971	830.593	0.0452	122.325	125.663	96.0639	99.53	600.08	0.06294	27.2887
1	64PE449_S02C01	2019-02-03T06:13:42	12.8432	-24.0558	4.6835	4.6188	33.0764	814.774	808.001	34.469	27.2974	831.514	0.055	122.764	126.114	96.0734	99.53	607.71	0.06294	27.2891
1	64PE449_S02C01	2019-02-03T06:13:42	12.8432	-24.0558	4.6767	4.6119	33.0705	815.785	809.001	34.4687	27.2979	832.509	0.0543	123.086	126.445	96.0735	99.53	618.05	0.06294	27.2896
1	64PE449_S02C01	2019-02-03T06:13:42	12.8432	-24.0558	4.6693	4.6045	33.0643	816.795	810.002	34.4686	27.2987	833.565	0.0583	123.147	126.508	96.0842	99.54	625.85	0.06294	27.2903
1	64PE449_S02C01	2019-02-03T06:13:42	12.8432	-24.0558	4.659	4.5941	33.0551	817.805	811.001	34.4681	27.2994	834.702	0.0599	123.232	126.595	96.0774	99.53	631.53	0.06294	27.291
1	64PE449_S02C01	2019-02-03T06:13:42	12.8432	-24.0558	4.6545	4.5896	33.0513	818.816	812	34.4678	27.2997	835.927	0.0759	123.357	126.724	96.0804	99.53	640.68	0.06294	27.2913
1	64PE449_S02C01	2019-02-03T06:13:42	12.8432	-24.0558	4.6535	4.5885	33.0508	819.826	812.997	34.4675	27.2996	837.174	0.0694	123.587	126.96	96.093	99.54	643.73	0.06294	27.2914
1	64PE449_S02C01	2019-02-03T06:13:42	12.8432	-24.0558	4.6528	4.5877	33.0508	820.836	813.997	34.4675	27.2996	838.254	0.0581	124.117	127.504	96.0926	99.54	641.97	0.06294	27.2916
1	64PE449_S02C01	2019-02-03T06:13:42	12.8432	-24.0558	4.6452	4.58	33.0445	821.847	814.998	34.4678	27.3007	839.194	0.0556	124.39	127.785	96.0907	99.54	638.25	0.06294	27.2926
1	64PE449_S02C01	2019-02-03T06:13:42	12.8432	-24.0558	4.625	4.56	33.0269	822.857	815.998	34.468	27.3031	840.05	0.0565	124.547	127.946	96.0842	99.54	633.47	0.06294	27.2946
1	64PE449_S02C01	2019-02-03T06:13:42	12.8432	-24.0558	4.6189	4.5538	33.0211	823.868	817	34.4672	27.3031	840.866	0.0568	124.576	127.976	96.0839	99.54	626.9	0.06294	27.2947
1	64PE449_S02C01	2019-02-03T06:13:42	12.8432	-24.0558	4.6181	4.5529	33.0208	824.878	818.004	34.467	27.3031	841.7	0.0622	124.707	128.111	96.0804	99.54	619.2	0.06294	27.2947
1	64PE449_S02C01	2019-02-03T06:13:42	12.8432	-24.0558	4.6153	4.55	33.0188	825.888	819.003	34.4669	27.3034	842.621	0.0634	124.938	128.348	96.0781	99.54	611.48	0.06294	27.295
1	64PE449_S02C01	2019-02-03T06:13:42	12.8432	-24.0558	4.6043	4.5391	33.0103	826.899	820.001	34.468	27.3054	843.644	0.0582	125.063	128.477	96.0919	99.54	605.92	0.06294	27.297
1	64PE449_S02C01	2019-02-03T06:13:42	12.8432	-24.0558	4.5985	4.5332	33.0057	827.909	821	34.4681	27.3061	844.77	0.0595	125.163	128.58	96.0838	99.54	595.47	0.06294	27.2978
1	64PE449_S02C01	2019-02-03T06:13:42	12.8432	-24.0558	4.5914	4.526	32.9996	828.92	821.997	34.4679	27.3068	845.838	0.0616	125.366	128.788	96.0799	99.54	591.72	0.06294	27.2985
1	64PE449_S02C01	2019-02-03T06:13:42	12.8432	-24.0558	4.5869	4.5215	32.996	829.93	822.999	34.4678	27.3072	846.799	0.0602	125.597	129.026	96.0792	99.55	598.1	0.06294	27.2989
1	64PE449_S02C01	2019-02-03T06:13:42	12.8432	-24.0558	4.5816	4.5161	32.9918	830.941	824.002	34.4679	27.3078	847.732	0.0549	125.912	129.349	96.0815	99.54	612.72	0.06294	27.2995
1	64PE449_S02C01	2019-02-03T06:13:42	12.8432	-24.0558	4.5749	4.5094	32.9858	831.951	825.003	34.4674	27.3082	848.764	0.0528	126.198	129.643	96.0777	99.54	632.25	0.06294	27.2999
1	64PE449_S02C01	2019-02-03T06:13:42	12.8432	-24.0558	4.5694	4.5038	32.9812	832.961	826.002	34.4671	27.3085	850.007	0.0484	126.58	130.036	96.0707	99.55	651.19	0.06294	27.3003
1	64PE449_S02C01	2019-02-03T06:13:42	12.8432	-24.0558	4.5633	4.4977	32.9758	833.972	826.997	34.4665	27.3088	851.402	0.0433	127.116	130.586	96.0745	99.55	659.98	0.06294	27.3006
1	64PE449_S02C01	2019-02-03T06:13:42	12.8432	-24.0558	4.5558	4.4901	32.9696	834.982	827.994	34.4667	27.3097	852.551	0.0459	127.671	131.157	96.072	99.55	656.19	0.06294	27.3015
1	64PE449_S02C01	2019-02-03T06:13:42	12.8432	-24.0558	4.5432	4.4775	32.9581	835.993	828.997	34.466	27.3106	853.489	0.0583	127.817	131.307	96.0846	99.54	643.32	0.06294	27.3022
1	64PE449_S02C01	2019-02-03T06:13:42	12.8432	-24.0558	4.5402	4.4744	32.9557	837.003	829.998	34.4657	27.3107	854.307	0.0646	128.035	131.531	96.0899	99.55	626.28	0.06294	27.3023
1	64PE449_S02C01	2019-02-03T06:13:42	12.8432	-24.0558	4.537	4.4713	32.9532	838.014	830.997	34.4655	27.3109	855.054	0.0617	128.212	131.713	96.0819	99.55	611.25	0.06294	27.3026
1	64PE449_S02C01	2019-02-03T06:13:42	12.8432	-24.0558	4.5346	4.4687	32.9514	839.024	832.005	34.4654	27.311	855.773	0.0584	128.27	131.772	96.0995	99.55	603.24	0.06294	27.3028
1	64PE449_S02C01	2019-02-03T06:13:42	12.8432	-24.0558	4.5323	4.4664	32.9497	840.034	833.003	34.4652	27.3112	856.561	0.0614	128.35	131.854	96.1071	99.55	598.86	0.06294	27.303
1	64PE449_S02C01	2019-02-03T06:13:42	12.8432	-24.0558	4.5301	4.4641	32.9482	841.045	834.004	34.4651	27.3113	857.443	0.0589	128.333	131.837	96.1001	99.55	599.91	0.06294	27.3032
1	64PE449_S02C01	2019-02-03T06:13:42	12.8432	-24.0558	4.5273	4.4612	32.9461	842.056	835.003	34.465	27.3116	858.469	0.0573	128.541	132.051	96.0963	99.55	608.05	0.06294	27.3035
1	64PE449_S02C01	2019-02-03T06:13:42	12.8432	-24.0558	4.5231	4.4569	32.9427	843.066	836.002	34.4649	27.3119	859.742	0.0606	128.812	132.329	96.1099	99.55	625.17	0.06294	27.3039
1	64PE449_S02C01	2019-02-03T06:13:42	12.8432	-24.0558	4.5172	4.451	32.9377	844.077	836.998	34.4646	27.3123	861.25	0.051	128.587	132.098	96.1111	99.55	636.1	0.06294	27.3043
1	64PE449_S02C01	2019-02-03T06:13:42	12.8432	-24.0558	4.5151	4.4489	32.9363	845.087	837.996	34.4644	27.3124	862.603	0.0498	128.606	132.118	96.1224	99.55	639.1	0.06294	27.3045
1	64PE449_S02C01	2019-02-03T06:13:42	12.8432	-24.0558	4.5134	4.4471	32.9355	846.098	838.996	34.4648	27.3129	863.694	0.0455	128.806	132.323	96.1277	99.55	641.21	0.06294	27.305
1	64PE449_S02C01	2019-02-03T06:13:42	12.8432	-24.0558	4.5129	4.4465	32.9357	847.108	839.998	34.4648	27.313	864.628	0.0558	128.926	132.446	96.1271	99.56	640.78	0.06294	27.3052
1	64PE449_S02C01	2019-02-03T06:13:42	12.8432	-24.0558	4.5115	4.445	32.9349	848.119	840.999	34.4649	27.3132	865.457	0.0559	129.05	132.574	96.1209	99.56	638.33	0.06294	27.3054
1	64PE449_S02C01	2019-02-03T06:13:42	12.8432	-24.0558	4.506	4.4394	32.9305	849.129	841.997	34.4651	27.314	866.236	0.0553	129.186	132.714	96.1222	99.56	634.68	0.06294	27.3061
1	64PE449_S02C01	2019-02-03T06:13:42	12.8432	-24.0558	4.5005	4.4339	32.926	850.14	843.003	34.4651	27.3146	866.996	0.0554	129.085	132.61	96.1194	99.55	626.73	0.06294	27.3067
1	64PE449_S02C01	2019-02-03T06:13:42	12.8432	-24.0558	4.4987	4.4321	32.9249	851.15	844.002	34.465	27.3148	867.809	0.0575	129.143	132.67	96.1197	99.56	616.42	0.06294	27.3069
1	64PE449_S02C01	2019-02-03T06:13:42	12.8432	-24.0558	4.4972	4.4305	32.924	852.161	845.003	34.4651	27.3149	868.692	0.0624	129.364	132.897	96.1096	99.56	609.27	0.06294	27.3071
1	64PE449_S02C01	2019-02-03T06:13:42	12.8432	-24.0558	4.4966	4.4297	32.9239	853.171	846.004	34.465	27.315	869.688	0.0583	129.292	132.823	96.0988	99.56	609.54	0.06294	27.3072
1	64PE449_S02C01	2019-02-03T06:13:42	12.8432	-24.0558	4.4954	4.4285	32.9234	854.182	847.001	34.465	27.3152	870.859	0.0593	129.299	132.83	96.106	99.56	613.5	0.06294	27.3074
1	64PE449_S02C01	2019-02-03T06:13:42	12.8432	-24.0558	4.4944	4.4274	32.9231	855.192	847.998	34.4652	27.3154	872.137	0.0605	129.514	133.051	96.1185	99.55	616.93	0.06294	27.3076
1	64PE449_S02C01	2019-02-03T06:13:42	12.8432	-24.0558	4.4861	4.4191	32.916	856.203	848.999	34.4651	27.3163	873.317	0.0569	129.66	133.201	96.1192	99.56	619.03	0.06294	27.3084
1	64PE449_S02C01	2019-02-03T06:13:42	12.8432	-24.0558	4.4829	4.4159	32.9136	857.213	849.998	34.465	27.3165	874.364	0.0632	130.074	133.626	96.1159	99.56	625.03	0.06294	27.3086
1	64PE449_S02C01	2019-02-03T06:13:42	12.8432	-24.0558	4.4798	4.4126	32.911	858.224	850.998	34.4649	27.3167	875.312	0.0615	130.422	133.984	96.0383	99.56	635.97	0.06294	27.3089
1	64PE449_S02C01	2019-02-03T06:13:42	12.8432	-24.0558	4.4754	4.4083	32.9074	859.234	852.001	34.4646	27.317	876.214	0.0557	130.446	134.008	96.027	99.56	646.69	0.06294	27.3091
1	64PE449_S02C01	2019-02-03T06:13:42	12.8432	-24.0558	4.4654	4.3981	32.8989	860.245	853.002	34.4648	27.3183	877.153	0.0541	130.405	133.966	96.1071	99.56	652.83	0.06294	27.3102
1	64PE449_S02C01	2019-02-03T06:13:42	12.8432	-24.0558	4.4592	4.392	32.894	861.256	854.001	34.465	27.3191	878.188	0.0573	130.116	133.67	96.1195	99.56	653.73	0.06294	27.311
1	64PE449_S02C01	2019-02-03T06:13:42	12.8432	-24.0558	4.4597	4.3923	32.895	862.266	854.997	34.4651	27.3191	879.261	0.0463	129.654	133.195	96.1242	99.56	644.29	0.06294	27.3111
1	64PE449_S02C01	2019-02-03T06:13:42	12.8432	-24.0558	4.463	4.3955	32.8992	863.277	855.998	34.4659	27.3194	880.204	0.0479	130.079	133.632	96.0996	99.56	625.46	0.06294	27.3116
1	64PE449_S02C01	2019-02-03T06:13:42	12.8432	-24.0558	4.4635	4.3959	32.9008	864.287	857.002	34.4666	27.3199	881.085	0.0536	131.043	134.622	96.124	99.56	609.6	0.06294	27.3121
1	64PE449_S02C01	2019-02-03T06:13:42	12.8432	-24.0558	4.4535	4.386	32.8928	865.298	858.004	34.4672	27.3215	882.045	0.056	132.041	135.648	96.1257	99.56	604.53	0.06294	27.3136
1	64PE449_S02C01	2019-02-03T06:13:42	12.8432	-24.0558	4.4357	4.3681	32.876	866.309	859.001	34.4662	27.3226	883.166	0.0499	133.306	136.947	96.1142	99.56	608.8	0.06294	27.3143
1	64PE449_S02C01	2019-02-03T06:13:42	12.8432	-24.0558	4.4146	4.3472	32.8557	867.319	859.997	34.4642	27.3233	884.344	0.0495	134.365	138.035	96.1125	99.56	615.97	0.06294	27.3147
1	64PE449_S02C01	2019-02-03T06:13:42	12.8432	-24.0558	4.3925	4.325	32.8348	868.33	860.998	34.4627	27.3245	885.373	0.0612	135.003	138.691	96.1158	99.56	621.16	0.06294	27.3155
1	64PE449_S02C01	2019-02-03T06:13:42	12.8432	-24.0558	4.3814	4.314	32.825	869.34	862	34.4622	27.3252	886.316	0.0573	135.262	138.957	96.0922	99.56	626.63	0.06294	27.3163
1	64PE449_S02C01	2019-02-03T06:13:42	12.8432	-24.0558	4.3676	4.3002	32.813	870.351	863.003	34.4622	27.3267	887.271	0.0499	135.351	139.048	96.0767	99.56	633.11	0.06294	27.3177
1	64PE449_S02C01	2019-02-03T06:13:42	12.8432	-24.0558	4.3638	4.2964	32.8101	871.362	864.001	34.462	27.3269	888.326	0.0539	135.477	139.178	96.0645	99.57	640.95	0.06294	27.3181
1	64PE449_S02C01	2019-02-03T06:13:42	12.8432	-24.0558	4.3613	4.2937	32.8083	872.372	864.996	34.4618	27.3271	889.43	0.054	135.716	139.424	96.0427	99.57	648.34	0.06294	27.3184
1	64PE449_S02C01	2019-02-03T06:13:42	12.8432	-24.0558	4.3511	4.2835	32.8001	873.383	866	34.4623	27.3286	890.418	0.051	135.746	139.455	96.027	99.57	649.51	0.06294	27.3199
1	64PE449_S02C01	2019-02-03T06:13:42	12.8432	-24.0558	4.3433	4.2757	32.7938	874.394	867.003	34.4624	27.3295	891.336	0.0497	135.708	139.416	96.0082	99.57	647.5	0.06294	27.3208
1	64PE449_S02C01	2019-02-03T06:13:42	12.8432	-24.0558	4.3377	4.27	32.7897	875.404	868.003	34.4629	27.3305	892.319	0.054	135.745	139.454	95.9851	99.58	646.03	0.06294	27.3218
1	64PE449_S02C01	2019-02-03T06:13:42	12.8432	-24.0558	4.3359	4.2682	32.789	876.415	869	34.4633	27.331	893.424	0.0521	135.59	139.295	95.9737	99.58	642.7	0.06294	27.3225
1	64PE449_S02C01	2019-02-03T06:13:42	12.8432	-24.0558	4.3338	4.266	32.7886	877.425	869.996	34.4642	27.332	894.538	0.0515	135.966	139.681	95.9803	99.58	629.69	0.06294	27.3236
1	64PE449_S02C01	2019-02-03T06:13:42	12.8432	-24.0558	4.3282	4.2603	32.7845	878.436	870.998	34.4648	27.3331	895.503	0.0488	136.352	140.078	95.9694	99.58	610.13	0.06294	27.3247
1	64PE449_S02C01	2019-02-03T06:13:42	12.8432	-24.0558	4.3136	4.2459	32.772	879.447	872.001	34.465	27.3348	896.4	0.0471	136.562	140.294	95.9871	99.58	597.7	0.06294	27.3262
1	64PE449_S02C01	2019-02-03T06:13:42	12.8432	-24.0558	4.3052	4.2374	32.7643	880.457	873.003	34.4643	27.3351	897.317	0.0481	136.438	140.166	96.0469	99.58	594.4	0.06294	27.3265
1	64PE449_S02C01	2019-02-03T06:13:42	12.8432	-24.0558	4.3026	4.2346	32.7623	881.468	874.002	34.4641	27.3352	898.322	0.0482	136.553	140.285	96.1076	99.58	601.24	0.06294	27.3267
1	64PE449_S02C01	2019-02-03T06:13:42	12.8432	-24.0558	4.3018	4.2338	32.7626	882.479	875.001	34.4644	27.3356	899.414	0.0548	136.612	140.345	96.1074	99.58	615.15	0.06294	27.3272
1	64PE449_S02C01	2019-02-03T06:13:42	12.8432	-24.0558	4.2984	4.2303	32.7604	883.489	876.001	34.4648	27.3362	900.588	0.0573	136.826	140.565	96.0941	99.58	634.86	0.06294	27.328
1	64PE449_S02C01	2019-02-03T06:13:42	12.8432	-24.0558	4.2945	4.2265	32.7573	884.5	876.997	34.4645	27.3364	901.791	0.0558	136.917	140.659	96.0909	99.58	652.08	0.06294	27.3283
1	64PE449_S02C01	2019-02-03T06:13:42	12.8432	-24.0558	4.2926	4.2244	32.7557	885.511	877.997	34.4642	27.3364	902.837	0.0567	137.01	140.754	96.1095	99.59	659.15	0.06294	27.3283
1	64PE449_S02C01	2019-02-03T06:13:42	12.8432	-24.0558	4.2893	4.2211	32.7529	886.522	879	34.4637	27.3364	903.774	0.053	137.194	140.943	96.1243	99.58	659.22	0.06294	27.3283
1	64PE449_S02C01	2019-02-03T06:13:42	12.8432	-24.0558	4.2868	4.2185	32.7509	887.532	880.003	34.4633	27.3363	904.715	0.0441	137.32	141.073	96.1247	99.59	657.37	0.06294	27.3283
1	64PE449_S02C01	2019-02-03T06:13:42	12.8432	-24.0558	4.2849	4.2165	32.7497	888.543	881.002	34.4633	27.3365	905.778	0.0432	137.528	141.286	96.1165	99.58	653.63	0.06294	27.3286
1	64PE449_S02C01	2019-02-03T06:13:42	12.8432	-24.0558	4.2812	4.2127	32.7468	889.554	881.998	34.4634	27.337	906.904	0.0456	137.703	141.466	96.1233	99.59	638.69	0.06294	27.329
1	64PE449_S02C01	2019-02-03T06:13:42	12.8432	-24.0558	4.2786	4.2101	32.7449	890.564	882.998	34.4631	27.3371	907.927	0.0487	137.916	141.685	96.138	99.59	615.42	0.06294	27.3291
1	64PE449_S02C01	2019-02-03T06:13:42	12.8432	-24.0558	4.2718	4.2032	32.739	891.575	884	34.463	27.3377	908.857	0.0528	138.113	141.888	96.129	99.59	595.52	0.06294	27.3297
1	64PE449_S02C01	2019-02-03T06:13:42	12.8432	-24.0558	4.2682	4.1995	32.7362	892.586	885	34.463	27.3381	909.76	0.0564	138.072	141.846	96.1296	99.59	585.3	0.06294	27.33
1	64PE449_S02C01	2019-02-03T06:13:42	12.8432	-24.0558	4.2638	4.1951	32.7333	893.597	886.002	34.4636	27.339	910.666	0.0513	137.911	141.68	96.1212	99.59	584.44	0.06294	27.331
1	64PE449_S02C01	2019-02-03T06:13:42	12.8432	-24.0558	4.2578	4.1891	32.7298	894.607	887	34.4652	27.3409	911.617	0.051	137.839	141.607	96.1144	99.58	593.75	0.06294	27.3329
1	64PE449_S02C01	2019-02-03T06:13:42	12.8432	-24.0558	4.2543	4.1855	32.7275	895.618	888.001	34.4656	27.3416	912.631	0.0455	137.853	141.621	96.1212	99.59	611.85	0.06294	27.3336
1	64PE449_S02C01	2019-02-03T06:13:42	12.8432	-24.0558	4.2493	4.1805	32.724	896.629	889.002	34.4663	27.3427	913.708	0.0515	137.895	141.664	96.0924	99.59	636.15	0.06294	27.3346
1	64PE449_S02C01	2019-02-03T06:13:42	12.8432	-24.0558	4.2428	4.1739	32.7191	897.64	890	34.4667	27.3438	914.859	0.0544	137.948	141.719	96.0925	99.59	657.94	0.06294	27.3357
1	64PE449_S02C01	2019-02-03T06:13:42	12.8432	-24.0558	4.2397	4.1708	32.7169	898.65	890.999	34.4669	27.3442	916.025	0.0534	137.965	141.736	96.0732	99.59	672.76	0.06294	27.3361
1	64PE449_S02C01	2019-02-03T06:13:42	12.8432	-24.0558	4.239	4.17	32.717	899.661	891.999	34.4671	27.3444	917.162	0.0434	137.937	141.708	96.0998	99.59	678.24	0.06294	27.3365
1	64PE449_S02C01	2019-02-03T06:13:42	12.8432	-24.0558	4.2382	4.1691	32.717	900.672	893.001	34.4673	27.3447	918.243	0.0425	137.769	141.535	96.0917	99.6	669.5	0.06294	27.3368
1	64PE449_S02C01	2019-02-03T06:13:42	12.8432	-24.0558	4.2367	4.1676	32.7164	901.683	894.001	34.4675	27.3451	919.334	0.0505	137.87	141.639	96.0875	99.59	650.81	0.06294	27.3372
1	64PE449_S02C01	2019-02-03T06:13:42	12.8432	-24.0558	4.2335	4.1643	32.7142	902.693	894.998	34.4678	27.3456	920.452	0.0598	138.041	141.815	96.0987	99.59	625.72	0.06294	27.3378
1	64PE449_S02C01	2019-02-03T06:13:42	12.8432	-24.0558	4.2297	4.1604	32.7113	903.704	895.997	34.4678	27.3461	921.475	0.0503	137.907	141.677	96.1047	99.59	604.85	0.06294	27.3382
1	64PE449_S02C01	2019-02-03T06:13:42	12.8432	-24.0558	4.2283	4.159	32.7108	904.715	896.999	34.4682	27.3465	922.39	0.0482	137.8	141.567	96.1052	99.59	588.5	0.06294	27.3386
1	64PE449_S02C01	2019-02-03T06:13:42	12.8432	-24.0558	4.2268	4.1574	32.7105	905.726	897.999	34.4689	27.3472	923.241	0.0462	137.716	141.481	96.0984	99.59	577.34	0.06294	27.3393
1	64PE449_S02C01	2019-02-03T06:13:42	12.8432	-24.0558	4.2266	4.1571	32.7111	906.736	899.001	34.4692	27.3475	924.057	0.0427	137.486	141.245	96.106	99.59	575.95	0.06294	27.3397
1	64PE449_S02C01	2019-02-03T06:13:42	12.8432	-24.0558	4.2269	4.1573	32.7122	907.747	900.002	34.4695	27.3478	924.91	0.0477	137.326	141.08	96.1034	99.59	586.75	0.06294	27.34
1	64PE449_S02C01	2019-02-03T06:13:42	12.8432	-24.0558	4.2282	4.1585	32.7142	908.758	901.003	34.47	27.348	925.856	0.052	137.459	141.217	96.107	99.59	609.82	0.06294	27.3403
1	64PE449_S02C01	2019-02-03T06:13:42	12.8432	-24.0558	4.2275	4.1577	32.7145	909.769	902.001	34.4706	27.3486	926.911	0.057	137.561	141.322	96.1179	99.59	637.32	0.06294	27.3409
1	64PE449_S02C01	2019-02-03T06:13:42	12.8432	-24.0558	4.2245	4.1546	32.7125	910.78	903	34.4708	27.349	928.054	0.0505	137.677	141.441	96.0924	99.58	659.58	0.06294	27.3413
1	64PE449_S02C01	2019-02-03T06:13:42	12.8432	-24.0558	4.2191	4.1492	32.7086	911.791	904.001	34.4715	27.3501	929.208	0.0503	137.789	141.556	96.0959	99.59	670	0.06294	27.3423
1	64PE449_S02C01	2019-02-03T06:13:42	12.8432	-24.0558	4.2131	4.1432	32.704	912.801	905.001	34.4719	27.3511	930.394	0.0468	137.795	141.563	96.1167	99.59	673.32	0.06294	27.3433
1	64PE449_S02C01	2019-02-03T06:13:42	12.8432	-24.0558	4.2089	4.1389	32.7008	913.812	905.999	34.472	27.3516	931.646	0.0462	137.938	141.71	96.1071	99.59	666.17	0.06294	27.3437
1	64PE449_S02C01	2019-02-03T06:13:42	12.8432	-24.0558	4.202	4.132	32.6955	914.823	906.997	34.4726	27.3528	932.881	0.0409	138.127	141.904	96.108	99.59	649.52	0.06294	27.3448
1	64PE449_S02C01	2019-02-03T06:13:42	12.8432	-24.0558	4.1981	4.128	32.6927	915.834	907.998	34.4729	27.3535	933.955	0.0501	138.445	142.231	96.0972	99.59	633.49	0.06294	27.3455
1	64PE449_S02C01	2019-02-03T06:13:42	12.8432	-24.0558	4.1931	4.123	32.6891	916.845	908.997	34.4734	27.3544	934.908	0.0568	138.471	142.258	96.0913	99.59	617.51	0.06294	27.3464
1	64PE449_S02C01	2019-02-03T06:13:42	12.8432	-24.0558	4.1903	4.1201	32.6868	917.856	909.996	34.4731	27.3545	935.776	0.0557	138.636	142.427	96.0788	99.59	601.5	0.06294	27.3465
1	64PE449_S02C01	2019-02-03T06:13:42	12.8432	-24.0558	4.1885	4.1182	32.6856	918.866	910.998	34.473	27.3546	936.566	0.0533	138.654	142.446	96.078	99.59	591.98	0.06294	27.3466
1	64PE449_S02C01	2019-02-03T06:13:42	12.8432	-24.0558	4.1863	4.116	32.6842	919.877	912.001	34.4731	27.355	937.315	0.0537	138.793	142.589	96.0734	99.59	587.99	0.06294	27.347
1	64PE449_S02C01	2019-02-03T06:13:42	12.8432	-24.0558	4.1808	4.1104	32.6803	920.888	913.002	34.4738	27.3561	938.069	0.0464	139.092	142.896	96.082	99.58	590.46	0.06294	27.348
1	64PE449_S02C01	2019-02-03T06:13:42	12.8432	-24.0558	4.172	4.1016	32.6735	921.899	914.002	34.4747	27.3577	938.88	0.0383	139.327	143.138	96.0705	99.59	597.71	0.06294	27.3495
1	64PE449_S02C01	2019-02-03T06:13:42	12.8432	-24.0558	4.1685	4.0981	32.6707	922.91	915.005	34.4744	27.3578	939.774	0.0435	139.407	143.22	96.0846	99.59	611.81	0.06294	27.3496
1	64PE449_S02C01	2019-02-03T06:13:42	12.8432	-24.0558	4.1651	4.0946	32.6679	923.921	916.005	34.4741	27.358	940.858	0.052	139.578	143.395	96.0805	99.59	633.33	0.06294	27.3498
1	64PE449_S02C01	2019-02-03T06:13:42	12.8432	-24.0558	4.1557	4.0851	32.6603	924.932	917	34.4746	27.3594	942.4	0.0546	139.806	143.63	96.0705	99.59	664.9	0.06294	27.3512
1	64PE449_S02C01	2019-02-03T06:13:42	12.8432	-24.0558	4.1371	4.0667	32.6463	925.942	917.996	34.4773	27.3634	943.962	0.0467	140.02	143.85	96.0658	99.59	683.03	0.06294	27.355
1	64PE449_S02C01	2019-02-03T06:13:42	12.8432	-24.0558	4.1287	4.0582	32.6391	926.953	918.995	34.4771	27.3642	945.063	0.0421	140.598	144.444	96.0705	99.59	680.17	0.06294	27.3557
1	64PE449_S02C01	2019-02-03T06:13:42	12.8432	-24.0558	4.1249	4.0544	32.6362	927.964	919.997	34.4771	27.3645	945.977	0.0356	140.847	144.7	96.0776	99.59	668.15	0.06294	27.3561
1	64PE449_S02C01	2019-02-03T06:13:42	12.8432	-24.0558	4.1225	4.0519	32.6345	928.975	920.998	34.477	27.3647	946.798	0.0365	140.847	144.7	96.0729	99.6	654.53	0.06294	27.3563
1	64PE449_S02C01	2019-02-03T06:13:42	12.8432	-24.0558	4.1185	4.0478	32.6313	929.986	922	34.477	27.3651	947.571	0.038	141.047	144.906	96.0731	99.59	638.83	0.06294	27.3567
1	64PE449_S02C01	2019-02-03T06:13:42	12.8432	-24.0558	4.1145	4.0437	32.6282	930.997	923.003	34.477	27.3656	948.343	0.0313	141.29	145.155	96.067	99.6	620.37	0.06294	27.3572
1	64PE449_S02C01	2019-02-03T06:13:42	12.8432	-24.0558	4.1082	4.0374	32.623	932.008	924.001	34.477	27.3662	949.167	0.0362	141.443	145.313	96.0743	99.59	602.33	0.06294	27.3578
1	64PE449_S02C01	2019-02-03T06:13:42	12.8432	-24.0558	4.1062	4.0354	32.6216	933.019	925.001	34.4767	27.3662	950.041	0.0436	141.498	145.369	96.0714	99.59	591.38	0.06294	27.3579
1	64PE449_S02C01	2019-02-03T06:13:42	12.8432	-24.0558	4.1042	4.0333	32.6203	934.03	926	34.4768	27.3665	950.953	0.0504	141.77	145.649	96.0735	99.6	588.99	0.06294	27.3582
1	64PE449_S02C01	2019-02-03T06:13:42	12.8432	-24.0558	4.0994	4.0285	32.6166	935.041	926.999	34.4768	27.367	951.878	0.0502	142.186	146.076	96.0523	99.6	590.76	0.06294	27.3587
1	64PE449_S02C01	2019-02-03T06:13:42	12.8432	-24.0558	4.0863	4.0154	32.6061	936.052	928.002	34.4778	27.3691	952.811	0.052	142.424	146.321	96.0598	99.6	595.58	0.06294	27.3607
1	64PE449_S02C01	2019-02-03T06:13:42	12.8432	-24.0558	4.0773	4.0063	32.5983	937.062	929.003	34.4777	27.37	953.802	0.0577	142.426	146.323	96.0719	57.62	611.44	0.06294	27.3615
1	64PE449_S02C01	2019-02-03T06:13:42	12.8432	-24.0558	4.0738	4.0027	32.5958	938.073	930.004	34.4777	27.3704	954.976	0.0624	142.342	146.237	96.0695	59.96	642.57	0.06294	27.362
1	64PE449_S02C01	2019-02-03T06:13:42	12.8432	-24.0558	4.0713	4.0002	32.5945	939.084	930.998	34.4781	27.371	956.488	0.062	142.384	146.28	96.0544	100.44	675.03	0.06294	27.3627
1	64PE449_S02C01	2019-02-03T06:13:42	12.8432	-24.0558	4.07	3.9989	32.5941	940.095	931.994	34.4783	27.3713	957.776	0.0543	142.488	146.387	96.0588	99.61	682.3	0.06294	27.363
1	64PE449_S02C01	2019-02-03T06:13:42	12.8432	-24.0558	4.0684	3.9971	32.5934	941.106	932.998	34.4786	27.3717	958.749	0.0509	142.958	146.87	96.0366	99.61	679.21	0.06294	27.3635
1	64PE449_S02C01	2019-02-03T06:13:42	12.8432	-24.0558	4.0649	3.9935	32.5913	942.117	933.999	34.4793	27.3726	959.631	0.0474	143.148	147.065	96.0056	99.61	672.56	0.06294	27.3645
1	64PE449_S02C01	2019-02-03T06:13:42	12.8432	-24.0558	4.0546	3.9832	32.5842	943.128	935	34.4813	27.3753	960.481	0.0496	143.145	147.062	96.0113	99.61	659.52	0.06294	27.367
1	64PE449_S02C01	2019-02-03T06:13:42	12.8432	-24.0558	4.0408	3.9695	32.5718	944.139	935.999	34.4808	27.3763	961.31	0.0528	143.046	146.961	96.0042	99.62	641.84	0.06294	27.3678
1	64PE449_S02C01	2019-02-03T06:13:42	12.8432	-24.0558	4.0395	3.9681	32.571	945.15	937	34.4806	27.3763	962.114	0.0464	143.133	147.05	96.0089	99.61	623.67	0.06294	27.3679
1	64PE449_S02C01	2019-02-03T06:13:42	12.8432	-24.0558	4.0416	3.9701	32.5735	946.161	938.001	34.4806	27.3761	962.905	0.0434	143.14	147.057	96.0243	99.61	609.46	0.06294	27.3679
1	64PE449_S02C01	2019-02-03T06:13:42	12.8432	-24.0558	4.0436	3.972	32.5761	947.172	939.003	34.4809	27.3761	963.726	0.0387	143.12	147.037	96.0224	99.61	600.33	0.06294	27.368
1	64PE449_S02C01	2019-02-03T06:13:42	12.8432	-24.0558	4.044	3.9723	32.5771	948.183	940.003	34.4811	27.3762	964.65	0.0372	143.072	146.988	96.0256	99.61	598.01	0.06294	27.3682
1	64PE449_S02C01	2019-02-03T06:13:42	12.8432	-24.0558	4.044	3.9723	32.5781	949.194	941.001	34.4816	27.3766	965.73	0.0398	143.048	146.963	96.0061	99.61	602.64	0.06294	27.3687
1	64PE449_S02C01	2019-02-03T06:13:42	12.8432	-24.0558	4.0427	3.9709	32.5779	950.205	941.999	34.4822	27.3773	966.943	0.0413	143.402	147.327	96.0312	99.61	610.86	0.06294	27.3694
1	64PE449_S02C01	2019-02-03T06:13:42	12.8432	-24.0558	4.0363	3.9645	32.573	951.216	942.998	34.4826	27.3783	968.036	0.0509	143.642	147.574	96.0157	99.62	619.08	0.06294	27.3703
1	64PE449_S02C01	2019-02-03T06:13:42	12.8432	-24.0558	4.03	3.9581	32.5673	952.227	943.998	34.4822	27.3786	968.977	0.0575	143.781	147.716	96.0055	99.61	630.06	0.06294	27.3705
1	64PE449_S02C01	2019-02-03T06:13:42	12.8432	-24.0558	4.0236	3.9517	32.5622	953.238	945.002	34.4823	27.3793	969.871	0.0593	143.89	147.828	95.9943	99.61	644.31	0.06294	27.3712
1	64PE449_S02C01	2019-02-03T06:13:42	12.8432	-24.0558	4.0223	3.9503	32.5619	954.249	946.003	34.4829	27.3799	970.819	0.0519	143.945	147.885	95.9793	99.62	660.53	0.06294	27.3718
1	64PE449_S02C01	2019-02-03T06:13:42	12.8432	-24.0558	4.0184	3.9464	32.5591	955.26	947.002	34.483	27.3804	971.906	0.0455	144.29	148.24	95.1825	99.61	673.39	0.06294	27.3723
1	64PE449_S02C01	2019-02-03T06:13:42	12.8432	-24.0558	4.0149	3.9428	32.5564	956.271	947.999	34.4829	27.3808	973.137	0.0528	144.762	148.725	95.9453	99.62	676.22	0.06294	27.3726
1	64PE449_S02C01	2019-02-03T06:13:42	12.8432	-24.0558	4.0113	3.9391	32.5536	957.282	948.998	34.4829	27.3811	974.328	0.0532	145.138	149.111	96.0192	99.61	666.15	0.06294	27.373
1	64PE449_S02C01	2019-02-03T06:13:42	12.8432	-24.0558	4.0008	3.9286	32.5449	958.293	949.997	34.4832	27.3824	975.363	0.0529	145.594	149.58	96.028	99.61	645.17	0.06294	27.3742
1	64PE449_S02C01	2019-02-03T06:13:42	12.8432	-24.0558	3.99	3.9179	32.5358	959.304	950.998	34.4834	27.3837	976.284	0.0486	146.255	150.259	96.0354	99.61	623.45	0.06294	27.3753
1	64PE449_S02C01	2019-02-03T06:13:42	12.8432	-24.0558	3.9766	3.9044	32.5243	960.315	951.999	34.4837	27.3853	977.128	0.0448	146.727	150.744	96.0446	99.62	607.48	0.06294	27.3767
1	64PE449_S02C01	2019-02-03T06:13:42	12.8432	-24.0558	3.9652	3.893	32.514	961.327	952.999	34.4831	27.386	977.923	0.0492	146.995	151.019	96.0483	99.62	597.17	0.06294	27.3773
1	64PE449_S02C01	2019-02-03T06:13:42	12.8432	-24.0558	3.9488	3.8767	32.5004	962.338	954.003	34.4839	27.3883	978.72	0.0507	147.165	151.194	96.0551	99.62	596.16	0.06294	27.3793
1	64PE449_S02C01	2019-02-03T06:13:42	12.8432	-24.0558	3.943	3.8708	32.495	963.348	955.001	34.4831	27.3882	979.597	0.0448	147.289	151.322	96.0548	99.62	604.31	0.06294	27.3793
1	64PE449_S02C01	2019-02-03T06:13:42	12.8432	-24.0558	3.9429	3.8706	32.4952	964.36	956.003	34.4827	27.388	980.558	0.0469	147.445	151.482	96.0697	99.62	618.62	0.06294	27.3792
1	64PE449_S02C01	2019-02-03T06:13:42	12.8432	-24.0558	3.9372	3.865	32.4907	965.371	957.002	34.4827	27.3885	981.598	0.0463	147.557	151.597	96.0878	76.92	631.53	0.06294	27.3799
1	64PE449_S02C01	2019-02-03T06:13:42	12.8432	-24.0558	3.9311	3.8588	32.4855	966.382	958	34.4824	27.3889	982.706	0.0433	147.712	151.756	96.0785	34.77	642.34	0.06294	27.3803
1	64PE449_S02C01	2019-02-03T06:13:42	12.8432	-24.0558	3.9298	3.8574	32.4848	967.393	959.001	34.4822	27.3889	983.856	0.0485	147.802	151.849	96.09	99.75	656.2	0.06294	27.3804
1	64PE449_S02C01	2019-02-03T06:13:42	12.8432	-24.0558	3.9288	3.8563	32.4844	968.404	960	34.4821	27.389	985.037	0.0481	148.111	152.166	96.0976	99.63	669.67	0.06294	27.3806
1	64PE449_S02C01	2019-02-03T06:13:42	12.8432	-24.0558	3.9253	3.8528	32.4818	969.415	960.998	34.482	27.3892	986.231	0.0425	148.407	152.471	96.0836	99.63	675.1	0.06294	27.3809
1	64PE449_S02C01	2019-02-03T06:13:42	12.8432	-24.0558	3.9166	3.8441	32.4744	970.426	961.997	34.482	27.3901	987.305	0.0455	148.656	152.726	96.0896	99.63	667.85	0.06294	27.3817
1	64PE449_S02C01	2019-02-03T06:13:42	12.8432	-24.0558	3.9077	3.8351	32.4669	971.437	962.997	34.4821	27.3911	988.252	0.0389	148.863	152.939	96.0934	99.63	658.53	0.06294	27.3826
1	64PE449_S02C01	2019-02-03T06:13:42	12.8432	-24.0558	3.9017	3.8292	32.4622	972.448	963.998	34.4823	27.3918	989.121	0.0427	149.05	153.131	96.0966	99.63	648.75	0.06294	27.3834
1	64PE449_S02C01	2019-02-03T06:13:42	12.8432	-24.0558	3.8984	3.8257	32.4598	973.46	964.999	34.4823	27.3922	989.942	0.0485	149.318	153.407	96.0962	99.63	632.74	0.06294	27.3838
1	64PE449_S02C01	2019-02-03T06:13:42	12.8432	-24.0558	3.8963	3.8236	32.4585	974.471	966	34.4824	27.3925	990.74	0.0476	149.418	153.51	96.0975	99.63	616.15	0.06294	27.3841
1	64PE449_S02C01	2019-02-03T06:13:42	12.8432	-24.0558	3.8897	3.817	32.4535	975.482	967.003	34.4829	27.3936	991.549	0.0465	149.459	153.552	96.1103	99.63	601.7	0.06294	27.3852
1	64PE449_S02C01	2019-02-03T06:13:42	12.8432	-24.0558	3.8838	3.8111	32.4491	976.493	968.003	34.4833	27.3945	992.425	0.0462	149.586	153.683	96.108	99.64	594.17	0.06294	27.3861
1	64PE449_S02C01	2019-02-03T06:13:42	12.8432	-24.0558	3.8769	3.804	32.4442	977.504	969.002	34.4843	27.396	993.408	0.0541	149.612	153.709	96.1128	99.63	599.42	0.06294	27.3875
1	64PE449_S02C01	2019-02-03T06:13:42	12.8432	-24.0558	3.8725	3.7996	32.4416	978.515	970.001	34.4853	27.3972	994.5	0.0558	149.126	153.21	96.1036	99.64	619.05	0.06294	27.3888
1	64PE449_S02C01	2019-02-03T06:13:42	12.8432	-24.0558	3.873	3.8	32.4425	979.526	971	34.4852	27.3971	995.69	0.0475	148.747	152.821	96.1201	99.64	641.69	0.06294	27.3888
1	64PE449_S02C01	2019-02-03T06:13:42	12.8432	-24.0558	3.88	3.8069	32.4519	980.537	971.998	34.488	27.3986	996.855	0.0402	148.521	152.589	96.1209	99.64	655.01	0.06294	27.3906
1	64PE449_S02C01	2019-02-03T06:13:42	12.8432	-24.0558	3.8809	3.8077	32.4541	981.549	972.997	34.4891	27.3994	997.899	0.0357	148.567	152.636	96.0944	99.64	662.31	0.06294	27.3915
1	64PE449_S02C01	2019-02-03T06:13:42	12.8432	-24.0558	3.8817	3.8084	32.4563	982.56	973.999	34.4902	27.4002	998.866	0.0444	148.705	152.778	96.076	99.64	668.85	0.06294	27.3924
1	64PE449_S02C01	2019-02-03T06:13:42	12.8432	-24.0558	3.8816	3.8082	32.4576	983.571	975.001	34.4913	27.4012	999.803	0.0501	148.628	152.699	96.0516	99.64	671.38	0.06294	27.3934
1	64PE449_S02C01	2019-02-03T06:13:42	12.8432	-24.0558	3.8774	3.804	32.4544	984.582	976.001	34.4914	27.4017	1000.77	0.0521	148.677	152.75	96.0333	99.63	663.37	0.06294	27.3938
1	64PE449_S02C01	2019-02-03T06:13:42	12.8432	-24.0558	3.8756	3.8021	32.4531	985.593	977	34.4913	27.4017	1001.78	0.0558	148.827	152.904	96.0192	99.63	647.76	0.06294	27.3939
1	64PE449_S02C01	2019-02-03T06:13:42	12.8432	-24.0558	3.8735	3.8	32.4519	986.604	977.999	34.4915	27.4021	1002.77	0.0537	148.953	153.033	96.0199	99.64	632.23	0.06294	27.3943
1	64PE449_S02C01	2019-02-03T06:13:42	12.8432	-24.0558	3.8696	3.7959	32.4492	987.616	978.998	34.492	27.403	1003.71	0.0451	148.999	153.081	96.0193	99.63	618.68	0.06294	27.395
1	64PE449_S02C01	2019-02-03T06:13:42	12.8432	-24.0558	3.8659	3.7922	32.4463	988.627	979.998	34.4919	27.4032	1004.61	0.0426	149.028	153.111	96.0113	99.64	606.04	0.06294	27.3953
1	64PE449_S02C01	2019-02-03T06:13:42	12.8432	-24.0558	3.865	3.7912	32.446	989.638	981	34.492	27.4034	1005.46	0.0406	149.057	153.141	95.998	99.64	597.84	0.06294	27.3955
1	64PE449_S02C01	2019-02-03T06:13:42	12.8432	-24.0558	3.8648	3.791	32.4466	990.649	982.001	34.4923	27.4036	1006.27	0.0372	149.291	153.381	96.0038	99.63	599.66	0.06294	27.3958
1	64PE449_S02C01	2019-02-03T06:13:42	12.8432	-24.0558	3.8636	3.7897	32.448	991.66	983.003	34.4946	27.4057	1007.13	0.0299	149.547	153.644	95.9985	99.63	611.54	0.06294	27.3978
1	64PE449_S02C01	2019-02-03T06:13:42	12.8432	-24.0558	3.8542	3.7803	32.4407	992.672	984.004	34.4955	27.4074	1008.1	0.0432	149.736	153.839	95.9808	99.63	629.85	0.06294	27.3993
1	64PE449_S02C01	2019-02-03T06:13:42	12.8432	-24.0558	3.8459	3.772	32.4335	993.683	985.004	34.4953	27.408	1009.25	0.0501	149.737	153.84	95.9427	99.64	648.18	0.06294	27.3998
1	64PE449_S02C01	2019-02-03T06:13:42	12.8432	-24.0558	3.8395	3.7655	32.4279	994.694	985.999	34.495	27.4084	1010.64	0.0399	150.087	154.199	95.94	99.63	663.3	0.06294	27.4002
1	64PE449_S02C01	2019-02-03T06:13:42	12.8432	-24.0558	3.8344	3.7603	32.4235	995.705	986.996	34.4945	27.4086	1011.94	0.046	150.232	154.348	95.9404	99.63	673.59	0.06294	27.4003
1	64PE449_S02C01	2019-02-03T06:13:42	12.8432	-24.0558	3.8298	3.7558	32.4196	996.716	987.998	34.4943	27.4088	1012.97	0.0458	150.203	154.319	95.9502	99.64	674.05	0.06294	27.4006
1	64PE449_S02C01	2019-02-03T06:13:42	12.8432	-24.0558	3.8296	3.7554	32.4196	997.728	988.999	34.4938	27.4085	1013.88	0.0435	150.486	154.609	95.9489	99.64	670.94	0.06294	27.4004
1	64PE449_S02C01	2019-02-03T06:13:42	12.8432	-24.0558	3.8285	3.7543	32.419	998.739	990	34.4937	27.4085	1014.75	0.0481	150.695	154.824	95.9868	99.64	663.99	0.06294	27.4004
1	64PE449_S02C01	2019-02-03T06:13:42	12.8432	-24.0558	3.8243	3.75	32.4156	999.75	991.001	34.4937	27.409	1015.61	0.0513	150.772	154.903	95.9482	99.64	651.27	0.06294	27.4008
1	64PE449_S02C01	2019-02-03T06:13:42	12.8432	-24.0558	3.8196	3.7453	32.4117	1000.76	991.999	34.4934	27.4091	1016.51	0.0504	150.958	155.094	95.9936	99.65	635.51	0.06294	27.401
1	64PE449_S02C01	2019-02-03T06:13:42	12.8432	-24.0558	3.8176	3.7432	32.4102	1001.77	992.999	34.4933	27.4093	1017.4	0.0416	151.335	155.482	95.9909	99.64	619.29	0.06294	27.4011
1	64PE449_S02C01	2019-02-03T06:13:42	12.8432	-24.0558	3.8147	3.7403	32.408	1002.78	993.999	34.4931	27.4094	1018.25	0.0374	151.639	155.794	96.0153	99.64	603.57	0.06294	27.4013
1	64PE449_S02C01	2019-02-03T06:13:42	12.8432	-24.0558	3.8097	3.7353	32.4041	1003.79	995.002	34.4932	27.41	1019.1	0.0377	151.789	155.948	96.0262	99.64	593.39	0.06294	27.4019
1	64PE449_S02C01	2019-02-03T06:13:42	12.8432	-24.0558	3.7959	3.7215	32.393	1004.81	996.003	34.4943	27.4123	1020.01	0.0388	151.899	156.062	96.0451	99.64	596.04	0.06294	27.4039
1	64PE449_S02C01	2019-02-03T06:13:42	12.8432	-24.0558	3.7923	3.7178	32.3904	1005.82	997.002	34.4945	27.4127	1021.04	0.0404	151.806	155.966	96.0479	99.64	614.35	0.06294	27.4044
1	64PE449_S02C01	2019-02-03T06:13:42	12.8432	-24.0558	3.7905	3.7159	32.3896	1006.83	998.002	34.4949	27.4133	1022.19	0.0551	151.95	156.114	96.0692	99.64	639.18	0.06294	27.405
1	64PE449_S02C01	2019-02-03T06:13:42	12.8432	-24.0558	3.7885	3.7138	32.3889	1007.84	998.998	34.4956	27.414	1023.4	0.0504	151.892	156.055	96.0527	99.64	661.45	0.06294	27.4058
1	64PE449_S02C01	2019-02-03T06:13:42	12.8432	-24.0558	3.7838	3.7091	32.3866	1008.85	999.999	34.4972	27.4158	1024.49	0.0441	152.041	156.208	96.1038	99.64	673.6	0.06294	27.4076
1	64PE449_S02C01	2019-02-03T06:13:42	12.8432	-24.0558	3.7825	3.7077	32.3865	1009.86	1001	34.4978	27.4164	1025.47	0.0389	152.027	156.194	96.0755	99.65	677.28	0.06294	27.4082
1	64PE449_S02C01	2019-02-03T06:13:42	12.8432	-24.0558	3.7832	3.7084	32.388	1010.87	1002	34.4981	27.4166	1026.43	0.0442	151.998	156.164	96.1024	99.64	675.08	0.06294	27.4086
1	64PE449_S02C01	2019-02-03T06:13:42	12.8432	-24.0558	3.7827	3.7078	32.3885	1011.89	1003	34.4987	27.4171	1027.45	0.0474	152.142	156.312	96.1055	99.65	672.1	0.06294	27.4091
1	64PE449_S02C01	2019-02-03T06:13:42	12.8432	-24.0558	3.7782	3.7032	32.3852	1012.9	1004	34.4991	27.4179	1028.56	0.0409	152.432	156.61	96.1213	99.64	660.97	0.06294	27.4098
1	64PE449_S02C01	2019-02-03T06:13:42	12.8432	-24.0558	3.7737	3.6987	32.3812	1013.91	1005	34.4986	27.418	1029.65	0.0468	152.254	156.427	96.1189	99.65	638.43	0.06294	27.4099
1	64PE449_S02C01	2019-02-03T06:13:42	12.8432	-24.0558	3.7728	3.6977	32.3808	1014.92	1006	34.4985	27.418	1030.61	0.0502	152.267	156.441	96.1139	99.65	614.56	0.06294	27.4099
1	64PE449_S02C01	2019-02-03T06:13:42	12.8432	-24.0558	3.7717	3.6965	32.3804	1015.93	1007	34.4986	27.4181	1031.47	0.0488	152.267	156.441	96.108	99.65	596.68	0.06294	27.4101
1	64PE449_S02C01	2019-02-03T06:13:42	12.8432	-24.0558	3.7696	3.6944	32.3794	1016.94	1008	34.499	27.4187	1032.28	0.0446	152.277	156.451	96.1206	99.65	589.54	0.06294	27.4107
1	64PE449_S02C01	2019-02-03T06:13:42	12.8432	-24.0558	3.767	3.6917	32.3776	1017.95	1009	34.4991	27.4191	1033.07	0.0404	152.302	156.477	96.1155	99.65	590.89	0.06294	27.4111
1	64PE449_S02C01	2019-02-03T06:13:42	12.8432	-24.0558	3.7671	3.6917	32.3786	1018.97	1010	34.4997	27.4196	1033.89	0.0427	152.276	156.45	96.1196	99.65	600.58	0.06294	27.4116
1	64PE449_S02C01	2019-02-03T06:13:42	12.8432	-24.0558	3.765	3.6896	32.3775	1019.98	1011	34.5001	27.42	1034.76	0.0507	152.21	156.382	96.1183	99.65	617.39	0.06294	27.4121
1	64PE449_S02C01	2019-02-03T06:13:42	12.8432	-24.0558	3.7662	3.6906	32.3804	1020.99	1012	34.5016	27.4212	1035.71	0.0526	152.127	156.297	96.096	99.65	638.18	0.06294	27.4133
1	64PE449_S02C01	2019-02-03T06:13:42	12.8432	-24.0558	3.767	3.6914	32.3826	1022	1013	34.5027	27.422	1036.83	0.0446	151.946	156.111	96.0946	99.65	662.52	0.06294	27.4141
1	64PE449_S02C01	2019-02-03T06:13:42	12.8432	-24.0558	3.7671	3.6914	32.384	1023.01	1014	34.5037	27.4228	1038.38	0.0459	151.919	156.084	96.0834	99.65	679.79	0.06294	27.415
1	64PE449_S02C01	2019-02-03T06:13:42	12.8432	-24.0558	3.7671	3.6913	32.3849	1024.02	1015	34.5043	27.4232	1039.82	0.0385	151.964	156.13	96.065	99.65	673.98	0.06294	27.4154
1	64PE449_S02C01	2019-02-03T06:13:42	12.8432	-24.0558	3.7669	3.691	32.3854	1025.03	1016	34.5045	27.4234	1040.83	0.0415	152.096	156.266	96.0453	99.65	663.24	0.06294	27.4156
1	64PE449_S02C01	2019-02-03T06:13:42	12.8432	-24.0558	3.7646	3.6886	32.384	1026.04	1017	34.5049	27.424	1041.69	0.0454	152.147	156.318	96.0847	99.65	654.35	0.06294	27.4162
1	64PE449_S02C01	2019-02-03T06:13:42	12.8432	-24.0558	3.7614	3.6853	32.3818	1027.06	1018	34.5052	27.4245	1042.5	0.0502	152.124	156.295	96.0751	99.64	646.63	0.06294	27.4167
1	64PE449_S02C01	2019-02-03T06:13:42	12.8432	-24.0558	3.7613	3.6852	32.3825	1028.07	1019	34.5055	27.4248	1043.28	0.0474	152.134	156.305	96.0197	99.66	640.97	0.06294	27.4169
1	64PE449_S02C01	2019-02-03T06:13:42	12.8432	-24.0558	3.7605	3.6843	32.3824	1029.08	1020	34.5058	27.4251	1044.06	0.0422	152.176	156.348	96.0651	99.65	636.68	0.06294	27.4172
1	64PE449_S02C01	2019-02-03T06:13:42	12.8432	-24.0558	3.7606	3.6843	32.3833	1030.09	1021	34.5061	27.4254	1044.94	0.0387	152.123	156.294	96.0655	99.65	634.03	0.06294	27.4175
1	64PE449_S02C01	2019-02-03T06:13:42	12.8432	-24.0558	3.7601	3.6837	32.3831	1031.1	1022	34.5059	27.4253	1045.92	0.0424	151.925	156.09	96.0869	99.65	629.47	0.06294	27.4174
1	64PE449_S02C01	2019-02-03T06:13:42	12.8432	-24.0558	3.7603	3.6839	32.3837	1032.11	1023	34.5058	27.4252	1047.02	0.0374	151.987	156.154	96.0906	99.64	622.35	0.06294	27.4174
1	64PE449_S02C01	2019-02-03T06:13:42	12.8432	-24.0558	3.7616	3.6851	32.3854	1033.12	1024	34.5059	27.4252	1048.13	0.0388	151.91	156.075	96.092	99.65	617.23	0.06294	27.4174
1	64PE449_S02C01	2019-02-03T06:13:42	12.8432	-24.0558	3.7629	3.6863	32.3872	1034.14	1025	34.5061	27.4252	1049.18	0.0417	151.783	155.945	96.0806	99.65	623.85	0.06294	27.4175
1	64PE449_S02C01	2019-02-03T06:13:42	12.8432	-24.0558	3.7658	3.689	32.3905	1035.15	1026	34.5064	27.4252	1050.17	0.0419	151.752	155.913	96.0792	99.65	637.02	0.06294	27.4175
1	64PE449_S02C01	2019-02-03T06:13:42	12.8432	-24.0558	3.766	3.6892	32.3914	1036.16	1027	34.5067	27.4254	1051.09	0.0444	151.887	156.051	96.0738	99.65	647.64	0.06294	27.4177
1	64PE449_S02C01	2019-02-03T06:13:42	12.8432	-24.0558	3.7657	3.6888	32.392	1037.17	1028	34.5072	27.4258	1051.97	0.0418	151.96	156.126	96.0753	99.64	654.79	0.06294	27.4181
1	64PE449_S02C01	2019-02-03T06:13:42	12.8432	-24.0558	3.7649	3.6879	32.3922	1038.18	1029	34.5078	27.4264	1052.92	0.0367	151.925	156.091	96.0845	99.64	660.21	0.06294	27.4186
1	64PE449_S02C01	2019-02-03T06:13:42	12.8432	-24.0558	3.7645	3.6874	32.3928	1039.19	1030	34.5085	27.427	1054.02	0.0394	151.782	155.944	96.0906	99.65	663.38	0.06294	27.4192
1	64PE449_S02C01	2019-02-03T06:13:42	12.8432	-24.0558	3.7642	3.6871	32.3935	1040.2	1031	34.509	27.4274	1055.22	0.0433	151.761	155.922	96.0664	99.65	662.3	0.06294	27.4196
1	64PE449_S02C01	2019-02-03T06:13:42	12.8432	-24.0558	3.7639	3.6867	32.3937	1041.21	1032	34.5092	27.4276	1056.26	0.0408	151.741	155.902	96.0714	99.64	657.35	0.06294	27.4199
1	64PE449_S02C01	2019-02-03T06:13:42	12.8432	-24.0558	3.7635	3.6863	32.3942	1042.23	1033	34.5096	27.428	1057.19	0.0426	151.643	155.801	96.0702	99.64	652.3	0.06294	27.4202
1	64PE449_S02C01	2019-02-03T06:13:42	12.8432	-24.0558	3.7634	3.686	32.3948	1043.24	1034	34.51	27.4283	1058.09	0.0479	151.912	156.078	96.0714	99.64	648.58	0.06294	27.4205
1	64PE449_S02C01	2019-02-03T06:13:42	12.8432	-24.0558	3.7621	3.6847	32.3949	1044.25	1035	34.5109	27.4292	1059.06	0.0435	152.264	156.439	96.0692	99.64	646.85	0.06294	27.4213
1	64PE449_S02C01	2019-02-03T06:13:42	12.8432	-24.0558	3.7527	3.6753	32.3877	1045.26	1036	34.5119	27.4309	1060.06	0.0474	152.483	156.665	96.0572	99.64	647.62	0.06294	27.4229
1	64PE449_S02C01	2019-02-03T06:13:42	12.8432	-24.0558	3.7435	3.666	32.3804	1046.27	1037	34.5126	27.4324	1061.04	0.0474	152.82	157.011	96.06	99.64	643.86	0.06294	27.4242
1	64PE449_S02C01	2019-02-03T06:13:42	12.8432	-24.0558	3.7384	3.6608	32.3765	1047.28	1038	34.513	27.4332	1061.98	0.0481	153.164	157.365	96.0678	99.64	635.43	0.06294	27.4249
1	64PE449_S02C01	2019-02-03T06:13:42	12.8432	-24.0558	3.722	3.6445	32.3624	1048.3	1039	34.5133	27.4351	1062.91	0.0472	153.34	157.546	96.0488	99.64	628.22	0.06294	27.4266
1	64PE449_S02C01	2019-02-03T06:13:42	12.8432	-24.0558	3.7194	3.6418	32.36	1049.31	1040	34.5127	27.4349	1063.85	0.0389	153.598	157.811	96.0501	99.64	624.91	0.06294	27.4263
1	64PE449_S02C01	2019-02-03T06:13:42	12.8432	-24.0558	3.7091	3.6316	32.3506	1050.32	1041	34.512	27.4353	1064.78	0.035	153.865	158.085	96.0644	99.65	626.69	0.06294	27.4267
1	64PE449_S02C01	2019-02-03T06:13:42	12.8432	-24.0558	3.7043	3.6268	32.3465	1051.33	1042	34.5115	27.4354	1065.75	0.0413	153.964	158.187	96.0702	99.65	635.48	0.06294	27.4267
1	64PE449_S02C01	2019-02-03T06:13:42	12.8432	-24.0558	3.7017	3.6241	32.3445	1052.34	1043	34.5113	27.4356	1066.8	0.0418	153.928	158.15	96.0714	58.76	647.61	0.06294	27.427
1	64PE449_S02C01	2019-02-03T06:13:42	12.8432	-24.0558	3.7018	3.6241	32.3455	1053.35	1044	34.5117	27.4358	1067.9	0.0482	153.856	158.076	96.0508	50.83	658.99	0.06294	27.4274
1	64PE449_S02C01	2019-02-03T06:13:42	12.8432	-24.0558	3.7021	3.6243	32.3471	1054.36	1045	34.5127	27.4366	1069.02	0.0565	154.101	158.328	96.0339	99.68	665.27	0.06294	27.4282
1	64PE449_S02C01	2019-02-03T06:13:42	12.8432	-24.0558	3.7004	3.6225	32.3474	1055.38	1046	34.5142	27.438	1070.13	0.0433	154.17	158.399	96.0838	99.65	666.93	0.06294	27.4296
1	64PE449_S02C01	2019-02-03T06:13:42	12.8432	-24.0558	3.6933	3.6154	32.3421	1056.39	1047	34.515	27.4394	1071.15	0.0372	154.389	158.624	96.067	99.65	663.69	0.06294	27.4309
1	64PE449_S02C01	2019-02-03T06:13:42	12.8432	-24.0558	3.6863	3.6084	32.3366	1057.4	1048	34.5154	27.4403	1072.1	0.0393	154.383	158.618	96.0687	99.65	657.6	0.06294	27.4318
1	64PE449_S02C01	2019-02-03T06:13:42	12.8432	-24.0558	3.6794	3.6015	32.3304	1058.41	1049	34.5147	27.4405	1073.02	0.0378	154.441	158.678	96.0607	99.65	649.26	0.06294	27.4319
1	64PE449_S02C01	2019-02-03T06:13:42	12.8432	-24.0558	3.6782	3.6002	32.3295	1059.42	1050	34.5143	27.4403	1073.91	0.036	154.504	158.742	96.0705	99.65	641.44	0.06294	27.4318
1	64PE449_S02C01	2019-02-03T06:13:42	12.8432	-24.0558	3.6794	3.6013	32.3312	1060.43	1051	34.5145	27.4403	1074.8	0.0441	154.414	158.65	96.0731	99.65	634.97	0.06294	27.4319
1	64PE449_S02C01	2019-02-03T06:13:42	12.8432	-24.0558	3.6806	3.6024	32.3329	1061.44	1052	34.5147	27.4403	1075.71	0.0462	154.423	158.659	96.0778	99.66	633.96	0.06294	27.432
1	64PE449_S02C01	2019-02-03T06:13:42	12.8432	-24.0558	3.6815	3.6032	32.3346	1062.46	1053	34.5151	27.4406	1076.69	0.0502	154.442	158.679	96.0691	99.65	638.03	0.06294	27.4324
1	64PE449_S02C01	2019-02-03T06:13:42	12.8432	-24.0558	3.6793	3.6009	32.334	1063.47	1054	34.5161	27.4416	1077.7	0.0562	154.474	158.712	96.0894	99.65	640.27	0.06294	27.4334
1	64PE449_S02C01	2019-02-03T06:13:42	12.8432	-24.0558	3.6762	3.5978	32.3324	1064.48	1055	34.517	27.4427	1078.73	0.0542	154.73	158.975	96.073	99.66	643.62	0.06294	27.4344
1	64PE449_S02C01	2019-02-03T06:13:42	12.8432	-24.0558	3.6714	3.5929	32.3284	1065.49	1056	34.5168	27.443	1079.82	0.0516	154.663	158.906	96.0712	99.65	653.05	0.06294	27.4347
1	64PE449_S02C01	2019-02-03T06:13:42	12.8432	-24.0558	3.6685	3.59	32.326	1066.5	1057	34.5165	27.4431	1081	0.0464	154.946	159.197	96.0809	99.65	662.59	0.06294	27.4348
1	64PE449_S02C01	2019-02-03T06:13:42	12.8432	-24.0558	3.667	3.5884	32.3251	1067.51	1058	34.5164	27.4431	1082.18	0.0433	155.213	159.471	96.0876	99.66	663.53	0.06294	27.4348
1	64PE449_S02C01	2019-02-03T06:13:42	12.8432	-24.0558	3.6609	3.5823	32.3202	1068.53	1059	34.5166	27.4438	1083.21	0.0417	155.182	159.44	96.06	99.66	660.74	0.06294	27.4355
1	64PE449_S02C01	2019-02-03T06:13:42	12.8432	-24.0558	3.6564	3.5777	32.3165	1069.54	1060	34.5165	27.4443	1084.13	0.0417	155.215	159.473	96.0666	99.66	656.78	0.06294	27.4359
1	64PE449_S02C01	2019-02-03T06:13:42	12.8432	-24.0558	3.6559	3.5771	32.3167	1070.55	1061	34.5167	27.4445	1084.99	0.0468	155.399	159.663	96.0964	99.64	652.72	0.06294	27.4362
1	64PE449_S02C01	2019-02-03T06:13:42	12.8432	-24.0558	3.6567	3.5778	32.3189	1071.56	1062	34.5179	27.4453	1085.8	0.0426	155.401	159.665	96.0897	99.66	650.95	0.06294	27.437
1	64PE449_S02C01	2019-02-03T06:13:42	12.8432	-24.0558	3.6512	3.5724	32.3152	1072.57	1063	34.5188	27.4466	1086.6	0.0369	155.267	159.527	96.0665	99.66	650.13	0.06294	27.4383
1	64PE449_S02C01	2019-02-03T06:13:42	12.8432	-24.0558	3.6487	3.5697	32.3135	1073.58	1064	34.519	27.447	1087.45	0.0393	155.282	159.543	96.0686	99.66	649.42	0.06294	27.4386
1	64PE449_S02C01	2019-02-03T06:13:42	12.8432	-24.0558	3.6448	3.5658	32.3109	1074.59	1065.01	34.5193	27.4477	1088.41	0.0433	155.08	159.335	96.0961	99.66	648.23	0.06294	27.4393
1	64PE449_S02C01	2019-02-03T06:13:42	12.8432	-24.0558	3.6438	3.5648	32.3107	1075.61	1066	34.5196	27.448	1089.58	0.0458	154.602	158.844	96.0964	99.66	644.17	0.06294	27.4397
1	64PE449_S02C01	2019-02-03T06:13:42	12.8432	-24.0558	3.6528	3.5736	32.3209	1076.62	1067	34.5214	27.4485	1090.9	0.0543	154.394	158.631	96.0754	99.66	639.33	0.06294	27.4405
1	64PE449_S02C01	2019-02-03T06:13:42	12.8432	-24.0558	3.6558	3.5765	32.3253	1077.63	1068	34.5228	27.4494	1092.06	0.0525	154.4	158.637	96.0761	99.65	645.58	0.06294	27.4415
1	64PE449_S02C01	2019-02-03T06:13:42	12.8432	-24.0558	3.6607	3.5812	32.3319	1078.64	1069	34.5249	27.4506	1093.1	0.0457	154.512	158.752	96.0359	99.65	656.95	0.06294	27.4427
1	64PE449_S02C01	2019-02-03T06:13:42	12.8432	-24.0558	3.6613	3.5818	32.3336	1079.65	1070	34.5257	27.4512	1094.06	0.0474	154.537	158.778	95.9958	99.66	663.08	0.06294	27.4433
1	64PE449_S02C01	2019-02-03T06:13:42	12.8432	-24.0558	3.6601	3.5805	32.3337	1080.67	1071	34.5266	27.452	1094.95	0.0469	154.629	158.873	95.9854	99.66	664.93	0.06294	27.4441
1	64PE449_S02C01	2019-02-03T06:13:42	12.8432	-24.0558	3.6583	3.5786	32.333	1081.68	1072	34.5273	27.4528	1095.79	0.0467	154.727	158.973	95.9724	99.65	665.69	0.06294	27.4448
1	64PE449_S02C01	2019-02-03T06:13:42	12.8432	-24.0558	3.6541	3.5744	32.3305	1082.69	1073	34.5283	27.454	1096.59	0.0426	154.911	159.163	95.9587	99.65	665.52	0.06294	27.4459
1	64PE449_S02C01	2019-02-03T06:13:42	12.8432	-24.0558	3.6478	3.568	32.3256	1083.7	1074	34.5288	27.455	1097.4	0.046	155.334	159.597	95.9483	99.65	663.86	0.06294	27.4468
1	64PE449_S02C01	2019-02-03T06:13:42	12.8432	-24.0558	3.6394	3.5596	32.3188	1084.71	1075	34.5292	27.4561	1098.29	0.041	155.632	159.904	95.9503	99.65	660.06	0.06294	27.4478
1	64PE449_S02C01	2019-02-03T06:13:42	12.8432	-24.0558	3.6333	3.5535	32.314	1085.72	1076	34.5294	27.4569	1099.3	0.0365	155.519	159.788	95.9845	99.65	654.24	0.06294	27.4485
1	64PE449_S02C01	2019-02-03T06:13:42	12.8432	-24.0558	3.6291	3.5493	32.3113	1086.73	1077	34.5301	27.4578	1100.57	0.0441	155.64	159.912	96.0122	99.65	653.6	0.06294	27.4494
1	64PE449_S02C01	2019-02-03T06:13:42	12.8432	-24.0558	3.6273	3.5474	32.3104	1087.75	1078	34.5303	27.4582	1102.24	0.0464	155.709	159.983	96.0191	99.65	667.77	0.06294	27.4499
1	64PE449_S02C01	2019-02-03T06:13:42	12.8432	-24.0558	3.6254	3.5454	32.3099	1088.76	1078.99	34.5311	27.4591	1103.52	0.0446	155.828	160.106	96.0393	99.65	670.54	0.06294	27.4508
1	64PE449_S02C01	2019-02-03T06:13:42	12.8432	-24.0558	3.6225	3.5424	32.3091	1089.77	1080	34.5328	27.4607	1104.41	0.0484	155.847	160.125	96.0164	99.66	665.68	0.06294	27.4524
1	64PE449_S02C01	2019-02-03T06:13:42	12.8432	-24.0558	3.6198	3.5397	32.3077	1090.78	1081	34.5334	27.4615	1105.18	0.0515	155.931	160.212	96.0153	99.65	661.29	0.06294	27.4531
1	64PE449_S02C01	2019-02-03T06:13:42	12.8432	-24.0558	3.6187	3.5385	32.3075	1091.79	1082	34.5338	27.4618	1105.91	0.0524	156.033	160.317	96.0408	99.66	656.18	0.06294	27.4535
1	64PE449_S02C01	2019-02-03T06:13:42	12.8432	-24.0558	3.6178	3.5375	32.3077	1092.81	1083.01	34.5344	27.4625	1106.64	0.0559	156.119	160.405	96.0409	99.66	650.45	0.06294	27.4542
1	64PE449_S02C01	2019-02-03T06:13:42	12.8432	-24.0558	3.6158	3.5354	32.3067	1093.82	1084	34.5349	27.4631	1107.44	0.0503	156.226	160.515	96.0354	99.66	646.17	0.06294	27.4547
1	64PE449_S02C01	2019-02-03T06:13:42	12.8432	-24.0558	3.6119	3.5315	32.3039	1094.83	1085	34.5352	27.4637	1108.32	0.0351	156.197	160.485	96.0341	99.66	645.84	0.06294	27.4553
1	64PE449_S02C01	2019-02-03T06:13:42	12.8432	-24.0558	3.6105	3.53	32.3035	1095.84	1086	34.5356	27.4641	1109.32	0.0355	156.184	160.472	96.0176	99.65	649.72	0.06294	27.4558
1	64PE449_S02C01	2019-02-03T06:13:42	12.8432	-24.0558	3.6094	3.5289	32.3034	1096.85	1087	34.5361	27.4647	1110.48	0.0475	156.194	160.483	96.0407	99.66	654.77	0.06294	27.4563
1	64PE449_S02C01	2019-02-03T06:13:42	12.8432	-24.0558	3.6071	3.5265	32.3025	1097.86	1088	34.5369	27.4655	1111.78	0.0411	156.12	160.407	96.0405	99.66	656.83	0.06294	27.4572
1	64PE449_S02C01	2019-02-03T06:13:42	12.8432	-24.0558	3.6062	3.5255	32.3022	1098.88	1089	34.537	27.4657	1112.95	0.0343	155.908	160.189	96.0392	99.66	661.29	0.06294	27.4574
1	64PE449_S02C01	2019-02-03T06:13:42	12.8432	-24.0558	3.6046	3.5239	32.302	1099.89	1090	34.5378	27.4665	1113.98	0.0301	155.88	160.16	96.0467	99.66	664.98	0.06294	27.4583
1	64PE449_S02C01	2019-02-03T06:13:42	12.8432	-24.0558	3.6045	3.5237	32.3041	1100.9	1091	34.5398	27.4681	1114.93	0.0359	155.982	160.265	96.0415	99.66	665.47	0.06294	27.4599
1	64PE449_S02C01	2019-02-03T06:13:42	12.8432	-24.0558	3.6044	3.5235	32.3051	1101.91	1092	34.5406	27.4688	1115.81	0.0462	156.062	160.348	96.0255	99.65	665.61	0.06294	27.4605
1	64PE449_S02C01	2019-02-03T06:13:42	12.8432	-24.0558	3.6042	3.5231	32.3057	1102.92	1093	34.5411	27.4692	1116.66	0.0442	156.09	160.376	96.0025	99.66	663.01	0.06294	27.461
1	64PE449_S02C01	2019-02-03T06:13:42	12.8432	-24.0558	3.6037	3.5226	32.3068	1103.93	1094	34.5423	27.4702	1117.51	0.0423	156.12	160.407	95.9936	99.66	658.51	0.06294	27.462
1	64PE449_S02C01	2019-02-03T06:13:42	12.8432	-24.0558	3.6028	3.5216	32.3066	1104.94	1095	34.5425	27.4705	1118.42	0.0367	156.191	160.48	95.998	99.66	654.65	0.06294	27.4623
1	64PE449_S02C01	2019-02-03T06:13:42	12.8432	-24.0558	3.6015	3.5202	32.306	1105.96	1096	34.5427	27.4707	1119.41	0.0408	156.187	160.476	95.973	99.66	650.86	0.06294	27.4625
1	64PE449_S02C01	2019-02-03T06:13:42	12.8432	-24.0558	3.598	3.5167	32.3039	1106.97	1097	34.5434	27.4716	1120.46	0.0398	156.142	160.43	95.9793	99.66	649.31	0.06294	27.4634
1	64PE449_S02C01	2019-02-03T06:13:42	12.8432	-24.0558	3.5961	3.5147	32.303	1107.98	1098	34.5438	27.4722	1121.56	0.0383	156.104	160.391	95.9878	99.66	652	0.06294	27.4639
1	64PE449_S02C01	2019-02-03T06:13:42	12.8432	-24.0558	3.5958	3.5144	32.304	1108.99	1099	34.5448	27.473	1122.66	0.0366	155.953	160.236	96.0056	99.66	658.92	0.06294	27.4647
1	64PE449_S02C01	2019-02-03T06:13:42	12.8432	-24.0558	3.596	3.5144	32.3059	1110	1100	34.5463	27.4742	1123.67	0.0411	155.796	160.075	96.0065	99.66	665.64	0.06294	27.466
1	64PE449_S02C01	2019-02-03T06:13:42	12.8432	-24.0558	3.5962	3.5146	32.3081	1111.02	1101	34.5481	27.4756	1124.59	0.0451	155.857	160.138	96.0007	99.66	667.29	0.06294	27.4674
1	64PE449_S02C01	2019-02-03T06:13:42	12.8432	-24.0558	3.5993	3.5176	32.313	1112.03	1102	34.55	27.4768	1125.47	0.0527	156.004	160.289	96.0049	99.66	665.31	0.06294	27.4687
1	64PE449_S02C01	2019-02-03T06:13:42	12.8432	-24.0558	3.5988	3.517	32.3135	1113.04	1103	34.5506	27.4774	1126.36	0.0495	156.074	160.361	95.9822	99.66	666.12	0.06294	27.4692
1	64PE449_S02C01	2019-02-03T06:13:42	12.8432	-24.0558	3.5954	3.5135	32.3109	1114.05	1104	34.5507	27.4778	1127.39	0.0456	156.095	160.383	95.9675	99.66	669.85	0.06294	27.4696
1	64PE449_S02C01	2019-02-03T06:13:42	12.8432	-24.0558	3.5946	3.5127	32.3108	1115.06	1105	34.5508	27.478	1128.6	0.0408	156.163	160.453	95.9825	99.66	670.37	0.06294	27.4698
1	64PE449_S02C01	2019-02-03T06:13:42	12.8432	-24.0558	3.5947	3.5126	32.3113	1116.07	1106	34.5509	27.478	1129.77	0.0397	156.227	160.519	95.9869	99.66	669.59	0.06294	27.4698
1	64PE449_S02C01	2019-02-03T06:13:42	12.8432	-24.0558	3.594	3.5119	32.3112	1117.09	1107	34.551	27.4781	1130.75	0.0359	156.32	160.614	95.9838	99.66	666.47	0.06294	27.4699
1	64PE449_S02C01	2019-02-03T06:13:42	12.8432	-24.0558	3.592	3.5099	32.3097	1118.1	1108	34.5508	27.4782	1131.62	0.0417	156.489	160.788	95.9732	99.66	658.38	0.06294	27.47
1	64PE449_S02C01	2019-02-03T06:13:42	12.8432	-24.0558	3.5887	3.5065	32.3071	1119.11	1109	34.5507	27.4785	1132.45	0.0418	156.681	160.985	95.9679	99.66	648.51	0.06294	27.4702
1	64PE449_S02C01	2019-02-03T06:13:42	12.8432	-24.0558	3.5862	3.504	32.3051	1120.12	1110	34.5505	27.4786	1133.31	0.0436	156.808	161.116	95.9674	99.65	643.87	0.06294	27.4702
1	64PE449_S02C01	2019-02-03T06:13:42	12.8432	-24.0558	3.5805	3.4982	32.3005	1121.13	1111	34.5506	27.4792	1134.27	0.0444	156.805	161.113	96.0038	99.65	647.4	0.06294	27.4708
1	64PE449_S02C01	2019-02-03T06:13:42	12.8432	-24.0558	3.578	3.4956	32.2988	1122.15	1112	34.5507	27.4795	1135.35	0.0445	156.799	161.106	96.0125	99.65	658.55	0.06294	27.4711
1	64PE449_S02C01	2019-02-03T06:13:42	12.8432	-24.0558	3.576	3.4935	32.2978	1123.16	1113	34.5512	27.4802	1136.52	0.0417	156.902	161.212	96.0146	99.65	670.08	0.06294	27.4717
1	64PE449_S02C01	2019-02-03T06:13:42	12.8432	-24.0558	3.574	3.4916	32.2971	1124.17	1114	34.5518	27.4808	1137.6	0.0409	156.912	161.223	96.0232	99.65	674.88	0.06294	27.4724
1	64PE449_S02C01	2019-02-03T06:13:42	12.8432	-24.0558	3.5735	3.4909	32.2973	1125.18	1115	34.5521	27.4811	1138.58	0.043	156.887	161.197	96.0391	99.66	676.5	0.06294	27.4727
1	64PE449_S02C01	2019-02-03T06:13:42	12.8432	-24.0558	3.5727	3.49	32.2973	1126.19	1116	34.5524	27.4815	1139.49	0.0362	156.755	161.062	96.0319	99.66	676.16	0.06294	27.4731
1	64PE449_S02C01	2019-02-03T06:13:42	12.8432	-24.0558	3.5717	3.489	32.2971	1127.2	1117	34.5527	27.4818	1140.35	0.0418	156.589	160.891	96.0407	99.66	670.31	0.06294	27.4734
1	64PE449_S02C01	2019-02-03T06:13:42	12.8432	-24.0558	3.5709	3.4881	32.2973	1128.22	1118	34.5533	27.4824	1141.19	0.0462	156.428	160.726	96.0389	99.66	662.09	0.06294	27.4739
1	64PE449_S02C01	2019-02-03T06:13:42	12.8432	-24.0558	3.5711	3.4882	32.3002	1129.23	1119	34.5559	27.4844	1142.09	0.0466	156.307	160.602	96.018	99.66	656.11	0.06294	27.4761
1	64PE449_S02C01	2019-02-03T06:13:42	12.8432	-24.0558	3.5742	3.4912	32.3055	1130.24	1120	34.5583	27.486	1143.11	0.0403	156.168	160.459	96.0191	99.65	653.46	0.06294	27.4777
1	64PE449_S02C01	2019-02-03T06:13:42	12.8432	-24.0558	3.578	3.4949	32.3107	1131.25	1121	34.5598	27.4869	1144.26	0.0403	156.228	160.521	95.9929	99.65	660.05	0.06294	27.4787
1	64PE449_S02C01	2019-02-03T06:13:42	12.8432	-24.0558	3.5804	3.4972	32.3139	1132.26	1122	34.5606	27.4872	1145.46	0.0443	156.022	160.309	95.9213	99.66	672.43	0.06294	27.4791
1	64PE449_S02C01	2019-02-03T06:13:42	12.8432	-24.0558	3.5831	3.4998	32.3172	1133.28	1123	34.5611	27.4874	1146.69	0.0366	156.253	160.547	95.876	99.65	678.95	0.06294	27.4793
1	64PE449_S02C01	2019-02-03T06:13:42	12.8432	-24.0558	3.5843	3.5009	32.3191	1134.29	1124	34.5615	27.4877	1147.83	0.0434	155.983	160.269	95.8458	99.66	672.34	0.06294	27.4796
1	64PE449_S02C01	2019-02-03T06:13:42	12.8432	-24.0558	3.5842	3.5007	32.3193	1135.3	1125	34.5613	27.4875	1148.81	0.0432	155.909	160.193	95.8183	99.66	659.93	0.06294	27.4794
1	64PE449_S02C01	2019-02-03T06:13:42	12.8432	-24.0558	3.5878	3.5041	32.3235	1136.31	1126	34.562	27.4877	1149.7	0.0419	155.917	160.202	95.8196	99.65	651.78	0.06294	27.4797
1	64PE449_S02C01	2019-02-03T06:13:42	12.8432	-24.0558	3.5894	3.5056	32.3257	1137.32	1127	34.5624	27.4879	1150.55	0.0383	155.771	160.052	95.7914	99.65	652.23	0.06294	27.4799
1	64PE449_S02C01	2019-02-03T06:13:42	12.8432	-24.0558	3.5895	3.5057	32.3263	1138.34	1128	34.5626	27.488	1151.36	0.0491	155.946	160.231	95.7635	99.65	655.06	0.06294	27.4799
1	64PE449_S02C01	2019-02-03T06:13:42	12.8432	-24.0558	3.5901	3.5061	32.3275	1139.35	1129	34.5628	27.4882	1152.15	0.0511	155.858	160.141	95.7812	99.65	654.71	0.06294	27.4801
1	64PE449_S02C01	2019-02-03T06:13:42	12.8432	-24.0558	3.5895	3.5055	32.3279	1140.36	1130	34.5634	27.4887	1152.93	0.0496	155.756	160.036	95.7737	99.64	650.63	0.06294	27.4806
1	64PE449_S02C01	2019-02-03T06:13:42	12.8432	-24.0558	3.5888	3.5048	32.3278	1141.37	1131	34.5636	27.4889	1153.78	0.0474	155.917	160.202	95.7574	99.65	647.35	0.06294	27.4807
1	64PE449_S02C01	2019-02-03T06:13:42	12.8432	-24.0558	3.5864	3.5023	32.3263	1142.38	1132	34.5639	27.4894	1154.72	0.0515	156.148	160.439	95.654	99.65	648.33	0.06294	27.4812
1	64PE449_S02C01	2019-02-03T06:13:42	12.8432	-24.0558	3.5848	3.5006	32.3253	1143.4	1133	34.564	27.4896	1155.84	0.049	156.45	160.749	95.648	99.66	657.57	0.06294	27.4813
1	64PE449_S02C01	2019-02-03T06:13:42	12.8432	-24.0558	3.5793	3.495	32.3211	1144.41	1134	34.5644	27.4905	1157.24	0.0466	156.505	160.806	95.793	99.65	676.63	0.06294	27.4821
1	64PE449_S02C01	2019-02-03T06:13:42	12.8432	-24.0558	3.5751	3.4909	32.3182	1145.42	1135	34.5648	27.4913	1158.66	0.0509	156.791	161.1	95.8574	99.65	698.57	0.06294	27.4828
1	64PE449_S02C01	2019-02-03T06:13:42	12.8432	-24.0558	3.5735	3.4891	32.3174	1146.43	1136	34.5651	27.4916	1159.78	0.0423	156.609	160.913	95.8871	99.65	706.54	0.06294	27.4832
1	64PE449_S02C01	2019-02-03T06:13:42	12.8432	-24.0558	3.5729	3.4885	32.3175	1147.44	1137	34.5652	27.4918	1160.75	0.0463	156.678	160.984	95.881	99.65	696.86	0.06294	27.4833
1	64PE449_S02C01	2019-02-03T06:13:42	12.8432	-24.0558	3.5723	3.4878	32.3173	1148.45	1138	34.5652	27.4919	1161.63	0.0459	156.688	160.994	95.9346	99.65	677.51	0.06294	27.4834
1	64PE449_S02C01	2019-02-03T06:13:42	12.8432	-24.0558	3.5718	3.4872	32.3174	1149.47	1139	34.5654	27.4921	1162.47	0.0416	156.782	161.091	95.9589	99.65	658.52	0.06294	27.4836
1	64PE449_S02C01	2019-02-03T06:13:42	12.8432	-24.0558	3.5723	3.4876	32.3184	1150.48	1140	34.5655	27.4921	1163.28	0.0398	156.832	161.142	95.9661	99.65	647.51	0.06294	27.4836
1	64PE449_S02C01	2019-02-03T06:13:42	12.8432	-24.0558	3.5714	3.4866	32.3183	1151.49	1141	34.5658	27.4925	1164.09	0.039	156.983	161.298	95.9648	99.65	641.41	0.06294	27.484
1	64PE449_S02C01	2019-02-03T06:13:42	12.8432	-24.0558	3.5681	3.4833	32.316	1152.5	1142	34.566	27.4929	1164.93	0.0422	157.098	161.416	95.9587	99.65	639.08	0.06294	27.4844
1	64PE449_S02C01	2019-02-03T06:13:42	12.8432	-24.0558	3.5674	3.4825	32.317	1153.52	1143	34.5675	27.4942	1165.84	0.0382	157.323	161.647	95.9772	99.65	639.68	0.06294	27.4857
1	64PE449_S02C01	2019-02-03T06:13:42	12.8432	-24.0558	3.5605	3.4756	32.3152	1154.53	1144	34.5722	27.4986	1166.81	0.0434	157.277	161.601	95.9867	99.65	644.42	0.06294	27.4899
1	64PE449_S02C01	2019-02-03T06:13:42	12.8432	-24.0558	3.5568	3.4719	32.3134	1155.54	1145	34.5735	27.5	1167.88	0.0418	157.173	161.494	95.9825	99.65	654.75	0.06294	27.4913
1	64PE449_S02C01	2019-02-03T06:13:42	12.8432	-24.0558	3.5551	3.47	32.313	1156.55	1146	34.5743	27.5009	1169.08	0.0431	157.351	161.677	96.0245	99.66	672.31	0.06294	27.4922
1	64PE449_S02C01	2019-02-03T06:13:42	12.8432	-24.0558	3.5531	3.468	32.3125	1157.56	1147	34.5752	27.5017	1170.34	0.0394	157.321	161.646	96.0257	99.66	690.13	0.06294	27.4931
1	64PE449_S02C01	2019-02-03T06:13:42	12.8432	-24.0558	3.5525	3.4673	32.3131	1158.57	1148	34.576	27.5025	1171.43	0.0458	157.658	161.993	96.0268	99.65	698.2	0.06294	27.4938
1	64PE449_S02C01	2019-02-03T06:13:42	12.8432	-24.0558	3.5517	3.4664	32.3139	1159.59	1149	34.5774	27.5036	1172.37	0.0363	157.886	162.227	96.0215	99.66	694.86	0.06294	27.495
1	64PE449_S02C01	2019-02-03T06:13:42	12.8432	-24.0558	3.5415	3.4563	32.3071	1160.6	1150	34.5797	27.5065	1173.26	0.0388	158.181	162.531	96.004	99.65	679.61	0.06294	27.4977
1	64PE449_S02C01	2019-02-03T06:13:42	12.8432	-24.0558	3.5365	3.4513	32.3038	1161.61	1151	34.5806	27.5077	1174.15	0.0396	158.261	162.613	95.9888	99.66	662.36	0.06294	27.4988
1	64PE449_S02C01	2019-02-03T06:13:42	12.8432	-24.0558	3.5307	3.4454	32.3014	1162.62	1152	34.5834	27.5105	1175.13	0.0407	158.156	162.506	96.0139	99.66	652.72	0.06294	27.5015
1	64PE449_S02C01	2019-02-03T06:13:42	12.8432	-24.0558	3.5286	3.4432	32.303	1163.64	1153	34.5868	27.5134	1176.2	0.0463	158.119	162.468	96.0381	99.65	653.9	0.06294	27.5045
1	64PE449_S02C01	2019-02-03T06:13:42	12.8432	-24.0558	3.5297	3.4442	32.306	1164.65	1154	34.5887	27.5149	1177.25	0.0474	158.111	162.46	96.0125	99.66	661.47	0.06294	27.506
1	64PE449_S02C01	2019-02-03T06:13:42	12.8432	-24.0558	3.5291	3.4435	32.3063	1165.66	1155	34.5892	27.5153	1178.18	0.0485	158.204	162.556	95.9868	99.65	665.32	0.06294	27.5065
1	64PE449_S02C01	2019-02-03T06:13:42	12.8432	-24.0558	3.528	3.4423	32.3062	1166.67	1156	34.5896	27.5157	1179.03	0.0461	158.349	162.705	95.9697	99.65	666.2	0.06294	27.507
1	64PE449_S02C01	2019-02-03T06:13:42	12.8432	-24.0558	3.5276	3.4418	32.3068	1167.68	1157	34.5901	27.5162	1179.86	0.0469	158.688	163.053	95.9645	99.65	660.43	0.06294	27.5075
1	64PE449_S02C01	2019-02-03T06:13:42	12.8432	-24.0558	3.5264	3.4406	32.3067	1168.69	1158	34.5908	27.5169	1180.73	0.047	158.865	163.235	95.9664	99.65	652.01	0.06294	27.5082
1	64PE449_S02C01	2019-02-03T06:13:42	12.8432	-24.0558	3.5173	3.4314	32.3024	1169.71	1159	34.595	27.5211	1181.7	0.0502	158.939	163.312	95.9674	99.66	650.05	0.06294	27.5122
1	64PE449_S02C01	2019-02-03T06:13:42	12.8432	-24.0558	3.51	3.4242	32.3009	1170.72	1160	34.6004	27.5261	1182.84	0.0532	159.124	163.503	95.9655	99.66	664.31	0.06294	27.5171
1	64PE449_S02C01	2019-02-03T06:13:42	12.8432	-24.0558	3.5095	3.4236	32.3019	1171.73	1161	34.6014	27.527	1184.08	0.0497	159.113	163.491	95.9489	99.66	681.83	0.06294	27.5181
1	64PE449_S02C01	2019-02-03T06:13:42	12.8432	-24.0558	3.5083	3.4223	32.3017	1172.74	1162	34.602	27.5275	1185.24	0.0435	159.087	163.465	95.9437	99.66	689.61	0.06294	27.5187
1	64PE449_S02C01	2019-02-03T06:13:42	12.8432	-24.0558	3.5073	3.4212	32.3014	1173.76	1163	34.6021	27.5277	1186.32	0.0414	159.143	163.522	95.9421	99.66	690.8	0.06294	27.5189
1	64PE449_S02C01	2019-02-03T06:13:42	12.8432	-24.0558	3.5069	3.4207	32.3015	1174.77	1164	34.6021	27.5278	1187.32	0.0417	159.424	163.811	95.9197	99.66	686.89	0.06294	27.519
1	64PE449_S02C01	2019-02-03T06:13:42	12.8432	-24.0558	3.5058	3.4195	32.3012	1175.78	1165	34.6023	27.5281	1188.27	0.0472	159.687	164.081	95.9361	99.66	678.85	0.06294	27.5193
1	64PE449_S02C01	2019-02-03T06:13:42	12.8432	-24.0558	3.5007	3.4144	32.2985	1176.79	1166	34.604	27.5299	1189.17	0.0526	159.902	164.303	95.9296	99.66	670.21	0.06294	27.5211
1	64PE449_S02C01	2019-02-03T06:13:42	12.8432	-24.0558	3.4946	3.4082	32.2957	1177.8	1167	34.6068	27.5327	1190.04	0.0477	159.922	164.324	95.9237	99.66	663.68	0.06294	27.5238
1	64PE449_S02C01	2019-02-03T06:13:42	12.8432	-24.0558	3.4929	3.4065	32.295	1178.82	1168	34.6072	27.5333	1190.9	0.0371	159.816	164.215	95.8943	99.67	660.31	0.06294	27.5244
1	64PE449_S02C01	2019-02-03T06:13:42	12.8432	-24.0558	3.4907	3.4043	32.2944	1179.83	1169	34.6082	27.5342	1191.76	0.0403	159.969	164.372	95.8281	99.66	658.24	0.06294	27.5253
1	64PE449_S02C01	2019-02-03T06:13:42	12.8432	-24.0558	3.4886	3.4021	32.2938	1180.84	1170	34.6092	27.5353	1192.62	0.0382	160.042	164.447	95.8024	99.66	654.08	0.06294	27.5263
1	64PE449_S02C01	2019-02-03T06:13:42	12.8432	-24.0558	3.4888	3.4022	32.2946	1181.85	1171	34.6094	27.5355	1193.58	0.0408	160.012	164.417	95.7866	99.66	651.92	0.06294	27.5266
1	64PE449_S02C01	2019-02-03T06:13:42	12.8432	-24.0558	3.4883	3.4016	32.2949	1182.86	1172	34.6098	27.5357	1194.69	0.0443	160.198	164.608	95.8009	99.66	655.32	0.06294	27.5269
1	64PE449_S02C01	2019-02-03T06:13:42	12.8432	-24.0558	3.485	3.3983	32.2927	1183.88	1173	34.6101	27.5363	1196.02	0.0472	160.165	164.574	95.8247	99.67	670.45	0.06294	27.5275
1	64PE449_S02C01	2019-02-03T06:13:42	12.8432	-24.0558	3.4834	3.3966	32.2929	1184.89	1174	34.6114	27.5376	1197.29	0.054	160.067	164.473	95.8303	99.67	689.16	0.06294	27.5288
1	64PE449_S02C01	2019-02-03T06:13:42	12.8432	-24.0558	3.4868	3.3999	32.2986	1185.9	1175	34.6139	27.5392	1198.35	0.0517	160.075	164.482	95.8134	99.66	701.36	0.06294	27.5306
1	64PE449_S02C01	2019-02-03T06:13:42	12.8432	-24.0558	3.4871	3.4001	32.2998	1186.91	1176	34.6144	27.5396	1199.31	0.0488	160.033	164.439	95.8439	99.66	700.89	0.06294	27.531
1	64PE449_S02C01	2019-02-03T06:13:42	12.8432	-24.0558	3.4876	3.4005	32.3008	1187.93	1177	34.6146	27.5398	1200.22	0.048	159.899	164.301	95.8202	99.67	692.1	0.06294	27.5311
1	64PE449_S02C01	2019-02-03T06:13:42	12.8432	-24.0558	3.4885	3.4014	32.3025	1188.94	1178	34.615	27.5399	1201.14	0.0455	159.865	164.266	95.8168	99.67	678.56	0.06294	27.5314
1	64PE449_S02C01	2019-02-03T06:13:42	12.8432	-24.0558	3.4913	3.404	32.3062	1189.95	1179	34.616	27.5405	1202.09	0.0452	160.025	164.431	95.8638	99.66	666.22	0.06294	27.5319
1	64PE449_S02C01	2019-02-03T06:13:42	12.8432	-24.0558	3.492	3.4046	32.3081	1190.96	1180	34.6169	27.5412	1203.07	0.0503	160.09	164.498	95.8617	99.66	656.7	0.06294	27.5327
1	64PE449_S02C01	2019-02-03T06:13:42	12.8432	-24.0558	3.4921	3.4046	32.3093	1191.97	1181	34.6177	27.5418	1204.06	0.0502	160.035	164.441	95.8581	99.66	650.5	0.06294	27.5333
1	64PE449_S02C01	2019-02-03T06:13:42	12.8432	-24.0558	3.4926	3.405	32.3111	1192.98	1182	34.6188	27.5426	1205.09	0.0462	160.081	164.489	95.8361	99.67	649.39	0.06294	27.5341
1	64PE449_S02C01	2019-02-03T06:13:42	12.8432	-24.0558	3.4908	3.4032	32.3106	1194	1183	34.6197	27.5435	1206.13	0.0404	160.357	164.772	95.8318	99.67	656.33	0.06294	27.535
1	64PE449_S02C01	2019-02-03T06:13:42	12.8432	-24.0558	3.4893	3.4016	32.311	1195.01	1184	34.6212	27.5449	1207.08	0.0465	160.512	164.932	95.8262	99.67	665.92	0.06294	27.5363
1	64PE449_S02C01	2019-02-03T06:13:42	12.8432	-24.0558	3.4901	3.4023	32.3143	1196.02	1185	34.6238	27.5468	1207.94	0.0438	160.46	164.879	95.8226	99.66	668.07	0.06294	27.5383
1	64PE449_S02C01	2019-02-03T06:13:42	12.8432	-24.0558	3.4876	3.3997	32.3141	1197.03	1186	34.6258	27.5488	1208.78	0.046	160.698	165.124	95.7956	99.67	666.18	0.06294	27.5401
1	64PE449_S02C01	2019-02-03T06:13:42	12.8432	-24.0558	3.4864	3.3985	32.314	1198.05	1187	34.6263	27.5493	1209.66	0.0542	160.803	165.232	95.7619	99.67	666.35	0.06294	27.5406
1	64PE449_S02C01	2019-02-03T06:13:42	12.8432	-24.0558	3.4844	3.3964	32.313	1199.06	1188	34.6268	27.5499	1210.71	0.0482	160.626	165.05	95.7544	99.66	672.68	0.06294	27.5412
1	64PE449_S02C01	2019-02-03T06:13:42	12.8432	-24.0558	3.4824	3.3943	32.3117	1200.07	1189	34.6269	27.5502	1212.04	0.0475	160.744	165.171	95.7457	99.67	684.09	0.06294	27.5414
1	64PE449_S02C01	2019-02-03T06:13:42	12.8432	-24.0558	3.4782	3.3901	32.3092	1201.08	1190	34.628	27.5514	1213.54	0.0543	160.951	165.384	95.7511	99.67	701.77	0.06294	27.5426
1	64PE449_S02C01	2019-02-03T06:13:42	12.8432	-24.0558	3.4765	3.3883	32.3098	1202.09	1191	34.6299	27.5531	1214.8	0.0485	160.901	165.333	95.7436	99.66	712.5	0.06294	27.5443
1	64PE449_S02C01	2019-02-03T06:13:42	12.8432	-24.0558	3.4782	3.3899	32.3126	1203.11	1192	34.631	27.5538	1215.83	0.0505	161.037	165.473	95.7361	99.67	710.52	0.06294	27.5451
1	64PE449_S02C01	2019-02-03T06:13:42	12.8432	-24.0558	3.48	3.3916	32.3161	1204.12	1193	34.6326	27.5549	1216.72	0.0449	161.382	165.827	95.7307	99.67	694.28	0.06294	27.5462
1	64PE449_S02C01	2019-02-03T06:13:42	12.8432	-24.0558	3.4805	3.3921	32.3181	1205.13	1194	34.6339	27.5559	1217.52	0.0436	161.332	165.776	95.7128	99.67	673.05	0.06294	27.5472
1	64PE449_S02C01	2019-02-03T06:13:42	12.8432	-24.0558	3.4805	3.3919	32.3197	1206.14	1195	34.6353	27.5571	1218.28	0.0515	161.439	165.886	95.7118	99.67	656.52	0.06294	27.5484
1	64PE449_S02C01	2019-02-03T06:13:42	12.8432	-24.0558	3.4794	3.3907	32.3214	1207.16	1196	34.638	27.5593	1219.06	0.0455	161.565	166.016	95.7006	99.67	643.91	0.06294	27.5506
1	64PE449_S02C01	2019-02-03T06:13:42	12.8432	-24.0558	3.4797	3.391	32.3238	1208.17	1197	34.64	27.5609	1219.9	0.042	161.503	165.953	95.6977	99.67	633.5	0.06294	27.5522
1	64PE449_S02C01	2019-02-03T06:13:42	12.8432	-24.0558	3.4786	3.3898	32.3248	1209.18	1198	34.6419	27.5625	1220.79	0.045	161.508	165.958	95.6938	99.67	629.11	0.06294	27.5538
1	64PE449_S02C01	2019-02-03T06:13:42	12.8432	-24.0558	3.4776	3.3887	32.325	1210.19	1199	34.6427	27.5633	1221.75	0.0487	161.585	166.037	95.6739	99.67	635.69	0.06294	27.5546
1	64PE449_S02C01	2019-02-03T06:13:42	12.8432	-24.0558	3.4772	3.3882	32.3254	1211.2	1200	34.643	27.5635	1222.88	0.0476	161.629	166.083	95.6588	99.67	656.05	0.06294	27.5548
1	64PE449_S02C01	2019-02-03T06:13:42	12.8432	-24.0558	3.4768	3.3877	32.3257	1212.22	1201	34.6433	27.5638	1224.3	0.0434	161.642	166.096	95.6893	99.67	686.57	0.06294	27.5551
1	64PE449_S02C01	2019-02-03T06:13:42	12.8432	-24.0558	3.4765	3.3874	32.3261	1213.23	1201.99	34.6435	27.564	1225.72	0.0448	161.889	166.35	95.6974	99.67	713.31	0.06294	27.5553
1	64PE449_S02C01	2019-02-03T06:13:42	12.8432	-24.0558	3.4736	3.3844	32.3254	1214.24	1203	34.6453	27.5657	1226.79	0.0475	162.116	166.583	95.6603	99.67	724.81	0.06294	27.5569
1	64PE449_S02C01	2019-02-03T06:13:42	12.8432	-24.0558	3.47	3.3807	32.3233	1215.25	1204	34.6462	27.5669	1227.72	0.0535	161.929	166.391	95.6814	99.67	721.99	0.06294	27.558
1	64PE449_S02C01	2019-02-03T06:13:42	12.8432	-24.0558	3.4681	3.3788	32.322	1216.27	1205	34.6462	27.5669	1228.58	0.0471	161.999	166.463	95.6776	99.67	709.07	0.06294	27.5581
1	64PE449_S02C01	2019-02-03T06:13:42	12.8432	-24.0558	3.4674	3.378	32.3218	1217.28	1206	34.6462	27.5671	1229.43	0.0519	162.224	166.695	95.6822	99.67	691.11	0.06294	27.5582
1	64PE449_S02C01	2019-02-03T06:13:42	12.8432	-24.0558	3.464	3.3746	32.3195	1218.29	1207	34.6465	27.5677	1230.31	0.0574	162.346	166.82	95.6598	99.67	674.13	0.06294	27.5587
1	64PE449_S02C01	2019-02-03T06:13:42	12.8432	-24.0558	3.46	3.3705	32.3172	1219.3	1208	34.6476	27.569	1231.24	0.0521	162.262	166.734	95.6778	99.67	662.07	0.06294	27.56
1	64PE449_S02C01	2019-02-03T06:13:42	12.8432	-24.0558	3.4613	3.3717	32.3197	1220.32	1209	34.6486	27.5696	1232.19	0.0468	162.535	167.015	95.6801	99.67	653.54	0.06294	27.5607
1	64PE449_S02C01	2019-02-03T06:13:42	12.8432	-24.0558	3.4619	3.3722	32.3214	1221.33	1210	34.6494	27.5702	1233.15	0.0507	162.697	167.181	95.6846	99.67	645.81	0.06294	27.5613
1	64PE449_S02C01	2019-02-03T06:13:42	12.8432	-24.0558	3.462	3.3722	32.3229	1222.34	1211	34.6506	27.5712	1234.12	0.0483	162.723	167.208	95.6679	99.67	642.24	0.06294	27.5623
1	64PE449_S02C01	2019-02-03T06:13:42	12.8432	-24.0558	3.462	3.3722	32.3245	1223.35	1212	34.6519	27.5722	1235.15	0.0427	163.089	167.584	95.6651	99.67	647.12	0.06294	27.5633
1	64PE449_S02C01	2019-02-03T06:13:42	12.8432	-24.0558	3.46	3.37	32.3251	1224.36	1213	34.6543	27.5743	1236.24	0.0415	163.36	167.863	95.677	99.67	657.87	0.06294	27.5654
1	64PE449_S02C01	2019-02-03T06:13:42	12.8432	-24.0558	3.4499	3.36	32.3173	1225.38	1214	34.6553	27.5761	1237.35	0.0474	163.388	167.892	95.693	99.67	674.47	0.06294	27.567
1	64PE449_S02C01	2019-02-03T06:13:42	12.8432	-24.0558	3.444	3.354	32.3124	1226.39	1215	34.6553	27.5767	1238.49	0.0443	163.075	167.571	95.6916	99.67	691.98	0.06294	27.5675
1	64PE449_S02C01	2019-02-03T06:13:42	12.8432	-24.0558	3.4433	3.3533	32.3125	1227.4	1216	34.6556	27.577	1239.64	0.049	163.18	167.679	95.6847	99.68	703.1	0.06294	27.5679
1	64PE449_S02C01	2019-02-03T06:13:42	12.8432	-24.0558	3.4441	3.354	32.3138	1228.41	1217	34.6557	27.577	1240.68	0.0424	163.34	167.843	95.6776	99.68	708.22	0.06294	27.5679
1	64PE449_S02C01	2019-02-03T06:13:42	12.8432	-24.0558	3.446	3.3557	32.3163	1229.43	1218	34.6561	27.5771	1241.62	0.0463	163.362	167.866	95.6785	99.68	704.75	0.06294	27.5681
1	64PE449_S02C01	2019-02-03T06:13:42	12.8432	-24.0558	3.4474	3.3571	32.3184	1230.44	1219	34.6565	27.5773	1242.51	0.0429	163.303	167.805	95.6779	99.67	695.22	0.06294	27.5684
1	64PE449_S02C01	2019-02-03T06:13:42	12.8432	-24.0558	3.4554	3.3649	32.3277	1231.45	1220	34.6584	27.5781	1243.4	0.0419	163.443	167.949	95.6634	99.68	683.01	0.06294	27.5693
1	64PE449_S02C01	2019-02-03T06:13:42	12.8432	-24.0558	3.4535	3.363	32.3273	1232.46	1221	34.6594	27.579	1244.33	0.0424	163.334	167.837	95.6732	99.67	674.83	0.06294	27.5703
1	64PE449_S02C01	2019-02-03T06:13:42	12.8432	-24.0558	3.4501	3.3595	32.3247	1233.48	1222	34.6595	27.5795	1245.3	0.0479	163.452	167.958	95.6632	99.67	671.83	0.06294	27.5706
1	64PE449_S02C01	2019-02-03T06:13:42	12.8432	-24.0558	3.449	3.3583	32.3242	1234.49	1223	34.6595	27.5796	1246.32	0.0602	163.745	168.26	95.6713	99.67	669.97	0.06294	27.5707
1	64PE449_S02C01	2019-02-03T06:13:42	12.8432	-24.0558	3.4445	3.3538	32.3206	1235.5	1224	34.6596	27.5801	1247.39	0.044	163.924	168.444	95.67	99.68	666.51	0.06294	27.5711
1	64PE449_S02C01	2019-02-03T06:13:42	12.8432	-24.0558	3.4383	3.3476	32.3155	1236.51	1225	34.6597	27.5808	1248.51	0.0396	163.997	168.519	95.6548	99.68	667.22	0.06294	27.5717
1	64PE449_S02C01	2019-02-03T06:13:42	12.8432	-24.0558	3.4345	3.3438	32.3147	1237.53	1226	34.6623	27.5832	1249.56	0.0413	164.18	168.707	95.6293	99.68	673.33	0.06294	27.5741
1	64PE449_S02C01	2019-02-03T06:13:42	12.8432	-24.0558	3.4339	3.343	32.3157	1238.54	1227	34.6636	27.5843	1250.52	0.0448	164.26	168.789	95.6335	99.67	675.75	0.06294	27.5752
1	64PE449_S02C01	2019-02-03T06:13:42	12.8432	-24.0558	3.4336	3.3427	32.3169	1239.55	1228	34.6647	27.5853	1251.41	0.0439	164.399	168.932	95.6526	99.68	675.07	0.06294	27.5762
1	64PE449_S02C01	2019-02-03T06:13:42	12.8432	-24.0558	3.4328	3.3418	32.3171	1240.56	1229	34.6653	27.5858	1252.28	0.0521	164.219	168.748	95.6609	99.68	675.91	0.06294	27.5767
1	64PE449_S02C01	2019-02-03T06:13:42	12.8432	-24.0558	3.4328	3.3417	32.3177	1241.57	1230	34.6654	27.5859	1253.22	0.0537	164.266	168.796	95.667	99.68	678.94	0.06294	27.5768
1	64PE449_S02C01	2019-02-03T06:13:42	12.8432	-24.0558	3.4331	3.3419	32.3188	1242.59	1231	34.6659	27.5862	1254.28	0.0525	164.46	168.995	95.6709	99.68	685.66	0.06294	27.5772
1	64PE449_S02C01	2019-02-03T06:13:42	12.8432	-24.0558	3.4321	3.3408	32.3191	1243.6	1232	34.6668	27.5871	1255.45	0.0444	164.596	169.135	95.6788	99.68	694.02	0.06294	27.5781
1	64PE449_S02C01	2019-02-03T06:13:42	12.8432	-24.0558	3.4292	3.3379	32.3174	1244.61	1233	34.6673	27.5878	1256.65	0.0442	164.973	169.523	95.6726	99.68	696.72	0.06294	27.5787
1	64PE449_S02C01	2019-02-03T06:13:42	12.8432	-24.0558	3.4234	3.3321	32.3135	1245.62	1234	34.6685	27.5893	1257.76	0.0401	165.261	169.819	95.666	99.68	684.05	0.06294	27.5801
1	64PE449_S02C01	2019-02-03T06:13:42	12.8432	-24.0558	3.4192	3.3278	32.3112	1246.64	1235	34.6697	27.5906	1258.82	0.0451	165.185	169.741	95.6787	99.68	676.62	0.06294	27.5814
1	64PE449_S02C01	2019-02-03T06:13:42	12.8432	-24.0558	3.4189	3.3274	32.3115	1247.65	1236	34.6698	27.5908	1259.82	0.0434	165.299	169.858	95.7417	99.68	681.83	0.06294	27.5816
1	64PE449_S02C01	2019-02-03T06:13:42	12.8432	-24.0558	3.4189	3.3273	32.3121	1248.66	1237	34.6699	27.5908	1260.74	0.0438	165.238	169.796	95.8213	99.68	685.17	0.06294	27.5817
1	64PE449_S02C01	2019-02-03T06:13:42	12.8432	-24.0558	3.419	3.3273	32.3127	1249.67	1238	34.67	27.5909	1261.57	0.0484	165.181	169.737	95.8297	99.68	676.95	0.06294	27.5818
1	64PE449_S02C01	2019-02-03T06:13:42	12.8432	-24.0558	3.4188	3.3271	32.3134	1250.69	1239	34.6705	27.5914	1262.35	0.0527	165.219	169.776	95.8172	99.68	665.26	0.06294	27.5823
1	64PE449_S02C01	2019-02-03T06:13:42	12.8432	-24.0558	3.4204	3.3285	32.3164	1251.7	1240	34.6719	27.5923	1263.14	0.0605	165.329	169.889	95.8321	99.69	656.73	0.06294	27.5833
1	64PE449_S02C01	2019-02-03T06:13:42	12.8432	-24.0558	3.4246	3.3326	32.3223	1252.71	1241.01	34.6737	27.5934	1264.02	0.0481	165.458	170.022	95.8228	99.68	653.04	0.06294	27.5845
1	64PE449_S02C01	2019-02-03T06:13:42	12.8432	-24.0558	3.4245	3.3324	32.3242	1253.72	1242.01	34.6756	27.5949	1265.1	0.0478	165.404	169.967	95.7533	99.68	665.36	0.06294	27.5859
1	64PE449_S02C01	2019-02-03T06:13:42	12.8432	-24.0558	3.423	3.3309	32.3242	1254.74	1243	34.6766	27.5959	1266.57	0.0489	165.733	170.305	95.6698	99.68	696.6	0.06294	27.5869
1	64PE449_S02C01	2019-02-03T06:13:42	12.8432	-24.0558	3.422	3.3298	32.3245	1255.75	1244	34.6777	27.5968	1268.06	0.0452	165.668	170.238	95.6686	99.68	712.09	0.06294	27.5878
1	64PE449_S02C01	2019-02-03T06:13:42	12.8432	-24.0558	3.4215	3.3293	32.325	1256.76	1245	34.6781	27.5973	1269.18	0.0498	165.678	170.249	95.6746	99.69	707.11	0.06294	27.5883
1	64PE449_S02C01	2019-02-03T06:13:42	12.8432	-24.0558	3.4209	3.3285	32.3252	1257.77	1246	34.6786	27.5977	1270.14	0.0515	165.991	170.57	95.6942	99.68	698.56	0.06294	27.5887
1	64PE449_S02C01	2019-02-03T06:13:42	12.8432	-24.0558	3.4198	3.3273	32.3252	1258.79	1247	34.6794	27.5984	1271	0.0432	166.058	170.639	95.6909	99.68	690.67	0.06294	27.5894
1	64PE449_S02C01	2019-02-03T06:13:42	12.8432	-24.0558	3.4189	3.3264	32.3255	1259.8	1248	34.68	27.599	1271.8	0.044	166.033	170.614	95.7046	99.68	685.33	0.06294	27.59
1	64PE449_S02C01	2019-02-03T06:13:42	12.8432	-24.0558	3.4187	3.3261	32.3258	1260.81	1249	34.6801	27.5991	1272.58	0.0454	166.184	170.769	95.7165	99.69	679.02	0.06294	27.5901
1	64PE449_S02C01	2019-02-03T06:13:42	12.8432	-24.0558	3.4183	3.3257	32.3261	1261.82	1250	34.6804	27.5994	1273.42	0.0525	166.342	170.931	95.7258	99.69	670.43	0.06294	27.5903
1	64PE449_S02C01	2019-02-03T06:13:42	12.8432	-24.0558	3.4179	3.3252	32.3265	1262.84	1251	34.6807	27.5997	1274.34	0.0584	166.178	170.763	95.7264	99.69	661.51	0.06294	27.5906
1	64PE449_S02C01	2019-02-03T06:13:42	12.8432	-24.0558	3.4172	3.3244	32.3265	1263.85	1252	34.6811	27.6001	1275.35	0.0584	166.099	170.682	95.734	99.68	658.44	0.06294	27.591
1	64PE449_S02C01	2019-02-03T06:13:42	12.8432	-24.0558	3.4167	3.3237	32.3269	1264.86	1253	34.6815	27.6005	1276.49	0.0588	166.131	170.715	95.7389	99.68	665.93	0.06294	27.5914
1	64PE449_S02C01	2019-02-03T06:13:42	12.8432	-24.0558	3.4155	3.3225	32.3269	1265.87	1254	34.6823	27.6012	1277.71	0.0525	166.159	170.744	95.7412	99.69	677.48	0.06294	27.5921
1	64PE449_S02C01	2019-02-03T06:13:42	12.8432	-24.0558	3.4148	3.3217	32.3271	1266.89	1255	34.6828	27.6017	1278.83	0.0461	166.216	170.802	95.7486	99.69	684.78	0.06294	27.5926
1	64PE449_S02C01	2019-02-03T06:13:42	12.8432	-24.0558	3.4146	3.3214	32.3276	1267.9	1256	34.683	27.6019	1279.85	0.0432	166.566	171.162	95.7635	99.69	689.98	0.06294	27.5928
1	64PE449_S02C01	2019-02-03T06:13:42	12.8432	-24.0558	3.4129	3.3196	32.3277	1268.91	1257	34.6845	27.6032	1280.85	0.0505	166.691	171.291	95.7871	99.69	692.24	0.06294	27.5941
1	64PE449_S02C01	2019-02-03T06:13:42	12.8432	-24.0558	3.4112	3.3179	32.3278	1269.92	1258	34.6858	27.6044	1281.91	0.0528	166.847	171.451	95.784	99.69	694.57	0.06294	27.5953
1	64PE449_S02C01	2019-02-03T06:13:42	12.8432	-24.0558	3.4111	3.3177	32.3281	1270.94	1259	34.6859	27.6045	1282.96	0.051	167.06	171.67	95.8118	99.68	701.2	0.06294	27.5954
1	64PE449_S02C01	2019-02-03T06:13:42	12.8432	-24.0558	3.4107	3.3172	32.3285	1271.95	1260	34.6862	27.6048	1283.92	0.0448	167.047	171.657	95.8366	99.69	706.37	0.06294	27.5957
1	64PE449_S02C01	2019-02-03T06:13:42	12.8432	-24.0558	3.4105	3.317	32.3289	1272.96	1261	34.6863	27.6049	1284.8	0.037	166.981	171.589	95.8395	99.68	703.68	0.06294	27.5958
1	64PE449_S02C01	2019-02-03T06:13:42	12.8432	-24.0558	3.4105	3.3169	32.3294	1273.97	1262	34.6864	27.605	1285.69	0.0378	166.921	171.527	95.8707	99.69	693.45	0.06294	27.5959
1	64PE449_S02C01	2019-02-03T06:13:42	12.8432	-24.0558	3.4103	3.3166	32.3297	1274.99	1263	34.6865	27.6051	1286.66	0.0445	167.013	171.622	95.8663	99.68	680.2	0.06294	27.596
1	64PE449_S02C01	2019-02-03T06:13:42	12.8432	-24.0558	3.41	3.3162	32.33	1276	1264	34.6867	27.6053	1287.78	0.0394	167.117	171.729	95.8675	99.68	674.01	0.06294	27.5962
1	64PE449_S02C01	2019-02-03T06:13:42	12.8432	-24.0558	3.4097	3.3159	32.3305	1277.01	1265	34.687	27.6056	1288.96	0.0409	166.968	171.576	95.8602	99.7	678.67	0.06294	27.5965
1	64PE449_S02C01	2019-02-03T06:13:42	12.8432	-24.0558	3.4092	3.3152	32.3307	1278.02	1266	34.6873	27.6059	1290.01	0.0414	166.984	171.592	95.8879	99.69	683.97	0.06294	27.5968
1	64PE449_S02C01	2019-02-03T06:13:42	12.8432	-24.0558	3.4088	3.3148	32.331	1279.04	1267	34.6876	27.6061	1290.97	0.0385	167.39	172.009	95.8892	99.69	682.53	0.06294	27.597
1	64PE449_S02C01	2019-02-03T06:13:42	12.8432	-24.0558	3.4088	3.3147	32.3315	1280.05	1268	34.6877	27.6062	1291.87	0.0358	167.441	172.062	95.8848	99.69	676.23	0.06294	27.5971
1	64PE449_S02C01	2019-02-03T06:13:42	12.8432	-24.0558	3.4076	3.3134	32.3315	1281.06	1269	34.6884	27.607	1292.74	0.0356	167.365	171.984	95.8804	99.7	672.78	0.06294	27.5978
1	64PE449_S02C01	2019-02-03T06:13:42	12.8432	-24.0558	3.4058	3.3115	32.3324	1282.07	1270	34.691	27.6091	1293.62	0.0364	167.445	172.066	95.8687	99.69	673.51	0.06294	27.5999
1	64PE449_S02C01	2019-02-03T06:13:42	12.8432	-24.0558	3.4071	3.3127	32.3381	1283.09	1271	34.6958	27.6129	1294.57	0.0384	167.544	172.169	95.8493	99.69	675.01	0.06294	27.6038
1	64PE449_S02C01	2019-02-03T06:13:42	12.8432	-24.0558	3.4089	3.3144	32.3417	1284.1	1272	34.6976	27.6142	1295.61	0.0404	167.524	172.149	95.863	99.69	677.17	0.06294	27.6051
1	64PE449_S02C01	2019-02-03T06:13:42	12.8432	-24.0558	3.411	3.3164	32.3449	1285.11	1273	34.6986	27.6148	1296.79	0.0364	167.484	172.108	95.8095	99.69	688.22	0.06294	27.6057
1	64PE449_S02C01	2019-02-03T06:13:42	12.8432	-24.0558	3.4135	3.3188	32.3487	1286.12	1274	34.6999	27.6156	1298.08	0.0356	167.562	172.188	95.7845	99.7	705.63	0.06294	27.6066
1	64PE449_S02C01	2019-02-03T06:13:42	12.8432	-24.0558	3.4141	3.3193	32.3499	1287.14	1275	34.7002	27.6158	1299.23	0.0436	167.673	172.302	95.7657	99.69	707.7	0.06294	27.6067
1	64PE449_S02C01	2019-02-03T06:13:42	12.8432	-24.0558	3.4143	3.3194	32.3505	1288.15	1276	34.7003	27.6158	1300.2	0.0427	167.614	172.241	95.7486	99.7	699.25	0.06294	27.6067
1	64PE449_S02C01	2019-02-03T06:13:42	12.8432	-24.0558	3.4144	3.3194	32.3511	1289.16	1277	34.7003	27.6159	1301.12	0.046	167.769	172.401	95.7535	99.7	689.05	0.06294	27.6068
1	64PE449_S02C01	2019-02-03T06:13:42	12.8432	-24.0558	3.415	3.3199	32.3525	1290.18	1278	34.7008	27.6162	1302.13	0.0465	167.724	172.354	95.7358	99.69	684.18	0.06294	27.6071
1	64PE449_S02C01	2019-02-03T06:13:42	12.8432	-24.0558	3.4163	3.3211	32.3548	1291.19	1279	34.7018	27.6169	1303.18	0.0467	167.705	172.335	95.7544	99.69	685.51	0.06294	27.6078
1	64PE449_S02C01	2019-02-03T06:13:42	12.8432	-24.0558	3.4182	3.323	32.3576	1292.2	1280	34.7024	27.6172	1304.13	0.0407	167.672	172.301	95.758	99.69	688.56	0.06294	27.6081
1	64PE449_S02C01	2019-02-03T06:13:42	12.8432	-24.0558	3.4202	3.3248	32.3604	1293.21	1281	34.7031	27.6176	1304.99	0.0458	167.78	172.412	95.7418	99.69	686.83	0.06294	27.6086
1	64PE449_S02C01	2019-02-03T06:13:42	12.8432	-24.0558	3.421	3.3256	32.3619	1294.23	1282	34.7036	27.6179	1305.81	0.0403	167.752	172.383	95.7167	99.69	678.72	0.06294	27.6088
1	64PE449_S02C01	2019-02-03T06:13:42	12.8432	-24.0558	3.4231	3.3275	32.365	1295.24	1283	34.7045	27.6185	1306.69	0.0418	167.667	172.296	95.7039	99.69	669.25	0.06294	27.6094
1	64PE449_S02C01	2019-02-03T06:13:42	12.8432	-24.0558	3.4241	3.3284	32.3668	1296.25	1284	34.7052	27.6189	1307.73	0.0419	167.713	172.344	95.6872	99.69	668.03	0.06294	27.6098
1	64PE449_S02C01	2019-02-03T06:13:42	12.8432	-24.0558	3.4245	3.3287	32.3678	1297.26	1285	34.7054	27.6191	1309.03	0.0496	167.793	172.426	95.6822	99.69	687.11	0.06294	27.61
1	64PE449_S02C01	2019-02-03T06:13:42	12.8432	-24.0558	3.4258	3.33	32.3702	1298.28	1285.99	34.7064	27.6197	1310.33	0.0511	167.861	172.496	95.6721	99.7	702.1	0.06294	27.6106
1	64PE449_S02C01	2019-02-03T06:13:42	12.8432	-24.0558	3.4275	3.3315	32.3737	1299.29	1287	34.7083	27.6211	1311.31	0.0496	167.925	172.562	95.6591	99.69	701.88	0.06294	27.612
1	64PE449_S02C01	2019-02-03T06:13:42	12.8432	-24.0558	3.4313	3.3352	32.3801	1300.3	1288	34.7113	27.6232	1312.17	0.0456	168.367	173.016	95.6487	99.69	699.48	0.06294	27.6141
1	64PE449_S02C01	2019-02-03T06:13:42	12.8432	-24.0558	3.4302	3.334	32.3801	1301.31	1289	34.712	27.6238	1313.03	0.0449	168.671	173.329	95.6377	99.69	692.6	0.06294	27.6147
1	64PE449_S02C01	2019-02-03T06:13:42	12.8432	-24.0558	3.4286	3.3323	32.3794	1302.33	1290	34.7124	27.6243	1313.96	0.0401	168.745	173.405	95.6533	99.69	684.43	0.06294	27.6151
1	64PE449_S02C01	2019-02-03T06:13:42	12.8432	-24.0558	3.4267	3.3304	32.3785	1303.34	1291	34.7129	27.6249	1314.95	0.0427	168.87	173.533	95.6857	99.69	679.34	0.06294	27.6156
1	64PE449_S02C01	2019-02-03T06:13:42	12.8432	-24.0558	3.4259	3.3295	32.3783	1304.35	1292	34.7131	27.6251	1315.95	0.0441	168.926	173.591	95.7494	99.69	673.48	0.06294	27.6158
1	64PE449_S02C01	2019-02-03T06:13:42	12.8432	-24.0558	3.4253	3.3288	32.3784	1305.36	1293	34.7133	27.6253	1317.02	0.0451	169.046	173.714	95.7823	99.69	666.6	0.06294	27.616
1	64PE449_S02C01	2019-02-03T06:13:42	12.8432	-24.0558	3.4252	3.3286	32.3789	1306.38	1294	34.7136	27.6256	1318.24	0.0451	168.675	173.333	95.8	99.69	667.36	0.06294	27.6163
1	64PE449_S02C01	2019-02-03T06:13:42	12.8432	-24.0558	3.4256	3.329	32.3807	1307.39	1295	34.7147	27.6265	1319.57	0.0339	168.674	173.332	95.8065	99.7	683.05	0.06294	27.6171
1	64PE449_S02C01	2019-02-03T06:13:42	12.8432	-24.0558	3.4273	3.3305	32.3834	1308.4	1296	34.7156	27.627	1320.67	0.0412	168.751	173.412	95.7946	99.7	697.45	0.06294	27.6177
1	64PE449_S02C01	2019-02-03T06:13:42	12.8432	-24.0558	3.4275	3.3307	32.3841	1309.42	1297	34.7157	27.6271	1321.58	0.0464	168.619	173.276	95.7678	99.71	702.02	0.06294	27.6178
1	64PE449_S02C01	2019-02-03T06:13:42	12.8432	-24.0558	3.4283	3.3314	32.3855	1310.43	1298	34.716	27.6273	1322.41	0.0471	168.665	173.323	95.7312	99.69	699.4	0.06294	27.618
1	64PE449_S02C01	2019-02-03T06:13:42	12.8432	-24.0558	3.428	3.331	32.3863	1311.44	1299	34.7168	27.6279	1323.2	0.0543	168.735	173.395	95.6852	99.7	694.16	0.06294	27.6186
1	64PE449_S02C01	2019-02-03T06:13:42	12.8432	-24.0558	3.4268	3.3297	32.386	1312.45	1300	34.7172	27.6284	1324.05	0.049	168.984	173.651	95.6523	99.7	690.5	0.06294	27.619
1	64PE449_S02C01	2019-02-03T06:13:42	12.8432	-24.0558	3.4256	3.3284	32.3855	1313.47	1301	34.7175	27.6287	1325.01	0.0499	169.105	173.776	95.6185	99.7	690.18	0.06294	27.6193
1	64PE449_S02C01	2019-02-03T06:13:42	12.8432	-24.0558	3.4245	3.3273	32.3853	1314.48	1302	34.7179	27.6291	1326.1	0.0456	169.015	173.683	95.6151	99.69	689.29	0.06294	27.6197
1	64PE449_S02C01	2019-02-03T06:13:42	12.8432	-24.0558	3.4241	3.3268	32.3859	1315.49	1303	34.7185	27.6297	1327.19	0.0429	169.103	173.774	95.68	99.7	683.32	0.06294	27.6203
1	64PE449_S02C01	2019-02-03T06:13:42	12.8432	-24.0558	3.424	3.3266	32.3863	1316.51	1304	34.7186	27.6297	1328.2	0.0391	169.227	173.901	95.6821	99.7	676.22	0.06294	27.6203
1	64PE449_S02C01	2019-02-03T06:13:42	12.8432	-24.0558	3.4233	3.3258	32.3865	1317.52	1305	34.719	27.6302	1329.23	0.0407	169.464	174.145	95.7043	99.69	674.41	0.06294	27.6208
1	64PE449_S02C01	2019-02-03T06:13:42	12.8432	-24.0558	3.424	3.3264	32.388	1318.53	1306	34.7197	27.6306	1330.25	0.0404	169.433	174.113	95.7206	99.7	676.01	0.06294	27.6212
1	64PE449_S02C01	2019-02-03T06:13:42	12.8432	-24.0558	3.4223	3.3246	32.3877	1319.54	1307	34.7206	27.6315	1331.22	0.042	169.635	174.321	95.7177	99.7	679.56	0.06294	27.6221
1	64PE449_S02C01	2019-02-03T06:13:42	12.8432	-24.0558	3.4204	3.3227	32.3864	1320.56	1308	34.7205	27.6317	1332.21	0.0491	169.994	174.69	95.7478	99.69	687.66	0.06294	27.6222
1	64PE449_S02C01	2019-02-03T06:13:42	12.8432	-24.0558	3.4165	3.3188	32.3831	1321.57	1309	34.7203	27.6318	1333.34	0.0495	170.079	174.777	95.7749	99.7	702.73	0.06294	27.6222
1	64PE449_S02C01	2019-02-03T06:13:42	12.8432	-24.0558	3.4147	3.3169	32.3819	1322.58	1310	34.7203	27.6321	1334.55	0.0454	170.093	174.791	95.8259	99.7	716.53	0.06294	27.6224
1	64PE449_S02C01	2019-02-03T06:13:42	12.8432	-24.0558	3.4145	3.3166	32.3823	1323.59	1311	34.7205	27.6322	1335.63	0.0392	170.2	174.901	95.8672	99.71	720.33	0.06294	27.6226
1	64PE449_S02C01	2019-02-03T06:13:42	12.8432	-24.0558	3.4137	3.3158	32.3821	1324.61	1312	34.7205	27.6323	1336.56	0.0294	170.453	175.161	95.8853	99.7	710.81	0.06294	27.6227
1	64PE449_S02C01	2019-02-03T06:13:42	12.8432	-24.0558	3.412	3.314	32.3809	1325.62	1313	34.7204	27.6325	1337.44	0.0285	170.522	175.232	95.9164	99.7	696.73	0.06294	27.6228
1	64PE449_S02C01	2019-02-03T06:13:42	12.8432	-24.0558	3.4079	3.3099	32.3776	1326.63	1314	34.7204	27.6328	1338.34	0.0275	170.562	175.273	95.9261	99.71	683.37	0.06294	27.6231
1	64PE449_S02C01	2019-02-03T06:13:42	12.8432	-24.0558	3.4047	3.3065	32.3755	1327.65	1315	34.7209	27.6335	1339.35	0.0327	170.76	175.477	95.9516	99.7	672.72	0.06294	27.6237
1	64PE449_S02C01	2019-02-03T06:13:42	12.8432	-24.0558	3.4047	3.3064	32.3762	1328.66	1316	34.7211	27.6337	1340.42	0.0339	170.742	175.459	95.9952	99.7	672.12	0.06294	27.624
1	64PE449_S02C01	2019-02-03T06:13:42	12.8432	-24.0558	3.4057	3.3074	32.3778	1329.67	1317	34.7214	27.6338	1341.46	0.0319	170.816	175.535	96.038	99.71	676.86	0.06294	27.6242
1	64PE449_S02C01	2019-02-03T06:13:42	12.8432	-24.0558	3.4087	3.3103	32.3817	1330.68	1318	34.7222	27.6342	1342.44	0.035	170.826	175.545	96.0355	99.71	678.85	0.06294	27.6246
1	64PE449_S02C01	2019-02-03T06:13:42	12.8432	-24.0558	3.4109	3.3123	32.3852	1331.7	1319	34.7235	27.6351	1343.44	0.0342	171.076	175.802	96.0579	99.71	676.78	0.06294	27.6255
1	64PE449_S02C01	2019-02-03T06:13:42	12.8432	-24.0558	3.4094	3.3108	32.385	1332.71	1320	34.7243	27.6359	1344.46	0.0361	171.052	175.778	96.0393	99.7	678.91	0.06294	27.6263
1	64PE449_S02C01	2019-02-03T06:13:42	12.8432	-24.0558	3.4067	3.308	32.3831	1333.72	1321	34.7246	27.6363	1345.47	0.0277	170.881	175.602	96.0492	99.71	685.18	0.06294	27.6267
1	64PE449_S02C01	2019-02-03T06:13:42	12.8432	-24.0558	3.4079	3.3091	32.3852	1334.74	1322	34.7251	27.6367	1346.42	0.037	170.917	175.639	96.0711	99.71	690.55	0.06294	27.6271
1	64PE449_S02C01	2019-02-03T06:13:42	12.8432	-24.0558	3.4119	3.313	32.3902	1335.75	1323	34.7263	27.6372	1347.33	0.0414	171.079	175.806	96.0718	99.7	694.33	0.06294	27.6277
1	64PE449_S02C01	2019-02-03T06:13:42	12.8432	-24.0558	3.4146	3.3156	32.3942	1336.76	1324	34.7276	27.638	1348.23	0.0478	171.135	175.863	96.0722	99.71	693.17	0.06294	27.6285
1	64PE449_S02C01	2019-02-03T06:13:42	12.8432	-24.0558	3.4154	3.3163	32.3963	1337.77	1325	34.7286	27.6388	1349.2	0.0516	171.183	175.913	96.0609	99.71	690.6	0.06294	27.6293
1	64PE449_S02C01	2019-02-03T06:13:42	12.8432	-24.0558	3.4168	3.3175	32.3985	1338.79	1326	34.7295	27.6393	1350.29	0.0458	170.987	175.711	96.0471	99.71	696.17	0.06294	27.6298
1	64PE449_S02C01	2019-02-03T06:13:42	12.8432	-24.0558	3.4176	3.3183	32.4001	1339.8	1327	34.73	27.6396	1351.5	0.0414	171.052	175.778	96.0593	99.71	706.65	0.06294	27.6301
1	64PE449_S02C01	2019-02-03T06:13:42	12.8432	-24.0558	3.4195	3.3201	32.4028	1340.81	1328	34.7305	27.6399	1352.78	0.0405	170.932	175.655	96.0379	99.71	707.31	0.06294	27.6304
1	64PE449_S02C01	2019-02-03T06:13:42	12.8432	-24.0558	3.4209	3.3214	32.4048	1341.82	1329	34.731	27.6401	1353.93	0.0427	170.863	175.584	96.0385	99.71	698.42	0.06294	27.6307
1	64PE449_S02C01	2019-02-03T06:13:42	12.8432	-24.0558	3.422	3.3224	32.4066	1342.84	1330	34.7313	27.6403	1354.94	0.0447	170.913	175.635	96.0296	99.71	692.8	0.06294	27.6309
1	64PE449_S02C01	2019-02-03T06:13:42	12.8432	-24.0558	3.4259	3.3261	32.4117	1343.85	1331	34.7328	27.6412	1355.86	0.0472	170.878	175.6	96.0276	99.71	688.76	0.06294	27.6317
1	64PE449_S02C01	2019-02-03T06:13:42	12.8432	-24.0558	3.4271	3.3273	32.4138	1344.86	1332	34.7335	27.6416	1356.71	0.0461	170.785	175.504	96.0106	99.71	681.53	0.06294	27.6322
1	64PE449_S02C01	2019-02-03T06:13:42	12.8432	-24.0558	3.4283	3.3283	32.4157	1345.88	1333	34.7341	27.6419	1357.55	0.0438	170.745	175.463	95.9959	99.71	674.17	0.06294	27.6325
1	64PE449_S02C01	2019-02-03T06:13:42	12.8432	-24.0558	3.4289	3.3289	32.4172	1346.89	1334	34.7347	27.6424	1358.42	0.0449	170.732	175.45	95.9731	99.71	672.64	0.06294	27.633
1	64PE449_S02C01	2019-02-03T06:13:42	12.8432	-24.0558	3.4292	3.3291	32.4182	1347.9	1335	34.735	27.6426	1359.36	0.0443	170.844	175.565	95.9647	99.71	673.79	0.06294	27.6331
1	64PE449_S02C01	2019-02-03T06:13:42	12.8432	-24.0558	3.4297	3.3295	32.4193	1348.92	1336	34.7354	27.6429	1360.38	0.0439	170.931	175.654	95.9671	99.7	674.6	0.06294	27.6334
1	64PE449_S02C01	2019-02-03T06:13:42	12.8432	-24.0558	3.4301	3.3298	32.4203	1349.93	1337	34.7356	27.6431	1361.45	0.0445	170.851	175.572	95.9651	99.71	679.76	0.06294	27.6335
1	64PE449_S02C01	2019-02-03T06:13:42	12.8432	-24.0558	3.4304	3.33	32.4213	1350.94	1338	34.736	27.6433	1362.56	0.0451	170.921	175.644	95.9421	99.71	691.34	0.06294	27.6337
1	64PE449_S02C01	2019-02-03T06:13:42	12.8432	-24.0558	3.4307	3.3303	32.4222	1351.95	1339	34.7362	27.6435	1363.7	0.0432	171.027	175.753	95.9239	99.71	704.68	0.06294	27.6339
1	64PE449_S02C01	2019-02-03T06:13:42	12.8432	-24.0558	3.4311	3.3305	32.423	1352.97	1340	34.7364	27.6436	1364.85	0.0449	170.903	175.626	95.9431	99.7	712.01	0.06294	27.634
1	64PE449_S02C01	2019-02-03T06:13:42	12.8432	-24.0558	3.4313	3.3306	32.4237	1353.98	1341	34.7365	27.6436	1365.93	0.0417	170.865	175.587	95.9275	99.71	711.65	0.06294	27.634
1	64PE449_S02C01	2019-02-03T06:13:42	12.8432	-24.0558	3.4315	3.3308	32.4246	1354.99	1342	34.7369	27.6439	1366.93	0.0406	170.801	175.521	95.9277	99.71	705.47	0.06294	27.6343
1	64PE449_S02C01	2019-02-03T06:13:42	12.8432	-24.0558	3.4314	3.3306	32.425	1356.01	1343	34.737	27.644	1367.85	0.0421	170.76	175.479	95.9369	99.71	699.62	0.06294	27.6344
1	64PE449_S02C01	2019-02-03T06:13:42	12.8432	-24.0558	3.4314	3.3304	32.4254	1357.02	1344	34.737	27.6441	1368.74	0.0442	170.971	175.696	95.9306	99.71	695.85	0.06294	27.6344
1	64PE449_S02C01	2019-02-03T06:13:42	12.8432	-24.0558	3.4313	3.3303	32.4259	1358.03	1345	34.7371	27.6442	1369.59	0.0483	171.226	175.958	95.9177	99.7	690.83	0.06294	27.6345
1	64PE449_S02C01	2019-02-03T06:13:42	12.8432	-24.0558	3.4313	3.3302	32.4266	1359.05	1346	34.7374	27.6444	1370.45	0.0518	171.368	176.104	95.93	99.71	682.87	0.06294	27.6347
1	64PE449_S02C01	2019-02-03T06:13:42	12.8432	-24.0558	3.4311	3.3299	32.4272	1360.06	1347	34.738	27.6449	1371.4	0.0493	171.275	176.008	95.9195	99.7	673.62	0.06294	27.6352
1	64PE449_S02C01	2019-02-03T06:13:42	12.8432	-24.0558	3.4331	3.3318	32.4311	1361.07	1348	34.7399	27.6463	1372.5	0.0358	171.045	175.772	95.9186	99.7	672.39	0.06294	27.6365
1	64PE449_S02C01	2019-02-03T06:13:42	12.8432	-24.0558	3.4369	3.3355	32.4364	1362.08	1349	34.7416	27.6473	1373.8	0.0409	170.989	175.715	95.9489	99.71	680	0.06294	27.6376
1	64PE449_S02C01	2019-02-03T06:13:42	12.8432	-24.0558	3.4374	3.3359	32.4377	1363.1	1350	34.7422	27.6477	1375.04	0.0507	170.837	175.559	95.9248	99.71	687.15	0.06294	27.638
1	64PE449_S02C01	2019-02-03T06:13:42	12.8432	-24.0558	3.4371	3.3356	32.438	1364.11	1351	34.7423	27.6478	1376.07	0.0508	170.978	175.704	95.8571	99.7	693.98	0.06294	27.6381
1	64PE449_S02C01	2019-02-03T06:13:42	12.8432	-24.0558	3.4366	3.3349	32.4378	1365.12	1352	34.7422	27.6478	1376.99	0.0521	171.104	175.833	95.8361	99.71	699.02	0.06294	27.638
1	64PE449_S02C01	2019-02-03T06:13:42	12.8432	-24.0558	3.4366	3.3349	32.4383	1366.14	1353	34.7422	27.6478	1377.87	0.0532	171.138	175.868	95.8456	99.7	700.05	0.06294	27.6381
1	64PE449_S02C01	2019-02-03T06:13:42	12.8432	-24.0558	3.4356	3.3337	32.4375	1367.15	1354	34.742	27.6477	1378.74	0.047	171.18	175.911	95.835	99.71	698.11	0.06294	27.6379
1	64PE449_S02C01	2019-02-03T06:13:42	12.8432	-24.0558	3.4359	3.334	32.4385	1368.16	1355	34.7422	27.6479	1379.66	0.0395	171.316	176.051	95.8386	99.7	696.36	0.06294	27.6381
1	64PE449_S02C01	2019-02-03T06:13:42	12.8432	-24.0558	3.4378	3.3358	32.4417	1369.18	1356	34.7435	27.6488	1380.64	0.0415	171.212	175.944	95.8811	99.71	694.77	0.06294	27.639
1	64PE449_S02C01	2019-02-03T06:13:42	12.8432	-24.0558	3.4401	3.3379	32.4453	1370.19	1357	34.7448	27.6496	1381.62	0.0476	171.075	175.803	95.8865	99.71	690.41	0.06294	27.6398
1	64PE449_S02C01	2019-02-03T06:13:42	12.8432	-24.0558	3.4416	3.3393	32.4477	1371.2	1358	34.7456	27.6501	1382.58	0.0503	171.114	175.844	95.8627	99.71	684.27	0.06294	27.6403
1	64PE449_S02C01	2019-02-03T06:13:42	12.8432	-24.0558	3.4424	3.3401	32.4494	1372.21	1359	34.7462	27.6505	1383.58	0.0519	171.101	175.83	95.8382	99.7	678.97	0.06294	27.6407
1	64PE449_S02C01	2019-02-03T06:13:42	12.8432	-24.0558	3.4437	3.3412	32.452	1373.23	1360	34.7475	27.6514	1384.67	0.0457	171.135	175.865	95.8248	99.7	678.01	0.06294	27.6416
1	64PE449_S02C01	2019-02-03T06:13:42	12.8432	-24.0558	3.4442	3.3416	32.4534	1374.24	1361	34.7481	27.6519	1385.84	0.044	171.018	175.745	95.7925	99.71	683.73	0.06294	27.6421
1	64PE449_S02C01	2019-02-03T06:13:42	12.8432	-24.0558	3.4443	3.3417	32.454	1375.25	1362	34.7482	27.6519	1387.02	0.0395	171.14	175.871	95.7731	99.71	692.14	0.06294	27.6421
1	64PE449_S02C01	2019-02-03T06:13:42	12.8432	-24.0558	3.4446	3.3419	32.4552	1376.27	1363	34.7488	27.6524	1388.09	0.0381	171.098	175.828	95.7508	99.7	697.4	0.06294	27.6425
1	64PE449_S02C01	2019-02-03T06:13:42	12.8432	-24.0558	3.4449	3.3421	32.4562	1377.28	1364	34.7492	27.6527	1389.14	0.044	171.148	175.879	95.7533	99.7	702.42	0.06294	27.6428
1	64PE449_S02C01	2019-02-03T06:13:42	12.8432	-24.0558	3.4451	3.3422	32.457	1378.29	1365	34.7494	27.6528	1390.2	0.0506	171.382	176.12	95.7388	99.71	709.94	0.06294	27.643
1	64PE449_S02C01	2019-02-03T06:13:42	12.8432	-24.0558	3.4452	3.3422	32.4578	1379.31	1366	34.7498	27.6532	1391.18	0.0459	171.537	176.279	95.7274	99.7	710.99	0.06294	27.6432
1	64PE449_S02C01	2019-02-03T06:13:42	12.8432	-24.0558	3.4453	3.3422	32.4589	1380.32	1367	34.7505	27.6537	1392.06	0.0413	171.526	176.268	95.719	99.7	702.66	0.06294	27.6438
1	64PE449_S02C01	2019-02-03T06:13:42	12.8432	-24.0558	3.4454	3.3422	32.4595	1381.33	1368	34.7506	27.6538	1392.88	0.0372	171.462	176.202	95.7113	99.7	690.92	0.06294	27.6439
1	64PE449_S02C01	2019-02-03T06:13:42	12.8432	-24.0558	3.4455	3.3422	32.4604	1382.34	1369	34.7512	27.6542	1393.73	0.0372	171.452	176.192	95.7086	99.71	681.34	0.06294	27.6443
1	64PE449_S02C01	2019-02-03T06:13:42	12.8432	-24.0558	3.4455	3.3422	32.4613	1383.36	1370	34.7516	27.6546	1394.71	0.0389	171.481	176.222	95.7036	99.7	681.94	0.06294	27.6447
1	64PE449_S02C01	2019-02-03T06:13:42	12.8432	-24.0558	3.4454	3.3419	32.4624	1384.37	1371	34.7526	27.6554	1395.86	0.0385	171.504	176.245	95.6935	99.7	691.37	0.06294	27.6455
1	64PE449_S02C01	2019-02-03T06:13:42	12.8432	-24.0558	3.4456	3.3421	32.4633	1385.38	1372	34.753	27.6557	1397.04	0.0408	171.657	176.403	95.7038	99.7	700.11	0.06294	27.6457
1	64PE449_S02C01	2019-02-03T06:13:42	12.8432	-24.0558	3.446	3.3424	32.4644	1386.4	1373	34.7534	27.656	1398.04	0.0483	171.727	176.475	95.7125	99.7	699.91	0.06294	27.646
1	64PE449_S02C01	2019-02-03T06:13:42	12.8432	-24.0558	3.446	3.3422	32.4657	1387.41	1374	34.7544	27.6568	1398.97	0.0488	171.765	176.514	95.7088	42.78	696.9	0.06294	27.6468
1	64PE449_S02C01	2019-02-03T06:13:42	12.8432	-24.0558	3.4456	3.3418	32.4663	1388.42	1375	34.755	27.6574	1399.94	0.0421	171.569	176.312	95.6986	56.01	697.55	0.06294	27.6473
1	64PE449_S02C01	2019-02-03T06:13:42	12.8432	-24.0558	3.446	3.3421	32.4674	1389.44	1376	34.7555	27.6577	1401.03	0.0455	171.618	176.363	95.6863	99.06	702	0.06294	27.6476
1	64PE449_S02C01	2019-02-03T06:13:42	12.8432	-24.0558	3.447	3.3431	32.4698	1390.45	1377	34.7567	27.6586	1402.14	0.0456	171.558	176.301	95.688	99.7	702.14	0.06294	27.6485
1	64PE449_S02C01	2019-02-03T06:13:42	12.8432	-24.0558	3.4477	3.3436	32.471	1391.46	1378	34.7568	27.6586	1403.13	0.0464	171.809	176.559	95.6931	99.71	702.02	0.06294	27.6486
1	64PE449_S02C01	2019-02-03T06:13:42	12.8432	-24.0558	3.4477	3.3435	32.4715	1392.47	1379	34.7569	27.6587	1404.05	0.0448	171.881	176.633	95.6385	99.7	696.04	0.06294	27.6487
1	64PE449_S02C01	2019-02-03T06:13:42	12.8432	-24.0558	3.4478	3.3435	32.472	1393.49	1380	34.757	27.6588	1404.92	0.043	171.668	176.414	95.6005	99.71	685.31	0.06294	27.6487
1	64PE449_S02C01	2019-02-03T06:13:42	12.8432	-24.0558	3.4478	3.3434	32.4726	1394.5	1381	34.7572	27.6589	1405.87	0.0425	171.684	176.431	95.6112	99.71	677.54	0.06294	27.6488
1	64PE449_S02C01	2019-02-03T06:13:42	12.8432	-24.0558	3.448	3.3435	32.4735	1395.52	1382	34.7576	27.6593	1406.96	0.0487	171.999	176.755	95.6149	99.71	680.84	0.06294	27.6491
1	64PE449_S02C01	2019-02-03T06:13:42	12.8432	-24.0558	3.4481	3.3436	32.4748	1396.53	1383	34.7585	27.6599	1408.15	0.0541	172	176.756	95.6022	99.71	691.67	0.06294	27.6498
1	64PE449_S02C01	2019-02-03T06:13:42	12.8432	-24.0558	3.4485	3.3439	32.476	1397.54	1384	34.759	27.6603	1409.21	0.0592	171.85	176.602	95.5878	99.71	696.31	0.06294	27.6502
1	64PE449_S02C01	2019-02-03T06:13:42	12.8432	-24.0558	3.4489	3.3442	32.4775	1398.55	1385	34.7598	27.661	1410.16	0.049	172.057	176.815	95.6017	99.71	696.74	0.06294	27.6508
1	64PE449_S02C01	2019-02-03T06:13:42	12.8432	-24.0558	3.4491	3.3444	32.4786	1399.57	1386	34.7604	27.6614	1411.11	0.0481	172.016	176.772	95.594	99.7	697.59	0.06294	27.6512
1	64PE449_S02C01	2019-02-03T06:13:42	12.8432	-24.0558	3.4493	3.3444	32.4794	1400.58	1387	34.7607	27.6616	1412.18	0.0572	172.026	176.783	95.5872	99.71	703.06	0.06294	27.6515
1	64PE449_S02C01	2019-02-03T06:13:42	12.8432	-24.0558	3.4494	3.3445	32.48	1401.59	1388	34.7607	27.6617	1413.28	0.0593	172.065	176.823	95.5786	99.7	711.41	0.06294	27.6515
1	64PE449_S02C01	2019-02-03T06:13:42	12.8432	-24.0558	3.4498	3.3448	32.4819	1402.61	1389	34.762	27.6626	1414.28	0.0597	172.192	176.954	95.5815	99.71	711.47	0.06294	27.6525
1	64PE449_S02C01	2019-02-03T06:13:42	12.8432	-24.0558	3.4501	3.3449	32.4839	1403.62	1390	34.7637	27.6639	1415.18	0.0586	172.486	177.256	95.5572	99.71	702.88	0.06294	27.6538
1	64PE449_S02C01	2019-02-03T06:13:42	12.8432	-24.0558	3.4509	3.3456	32.4862	1404.63	1391	34.765	27.6649	1416.05	0.0601	172.523	177.294	95.5711	99.71	689.98	0.06294	27.6548
1	64PE449_S02C01	2019-02-03T06:13:42	12.8432	-24.0558	3.4513	3.346	32.4876	1405.65	1392	34.7658	27.6655	1416.95	0.051	172.504	177.275	95.5781	99.71	681.56	0.06294	27.6554
1	64PE449_S02C01	2019-02-03T06:13:42	12.8432	-24.0558	3.4514	3.346	32.4885	1406.66	1393	34.7662	27.6659	1417.97	0.0451	172.755	177.533	95.558	99.7	680.12	0.06294	27.6557
1	64PE449_S02C01	2019-02-03T06:13:42	12.8432	-24.0558	3.4515	3.346	32.4897	1407.67	1394	34.7671	27.6666	1419.13	0.0505	172.967	177.751	95.5736	31.96	689.68	0.06294	27.6564
1	64PE449_S02C01	2019-02-03T06:13:42	12.8432	-24.0558	3.4513	3.3456	32.4914	1408.69	1395	34.7689	27.668	1420.26	0.0497	173.131	177.919	95.5864	84.55	700.33	0.06294	27.6578
1	64PE449_S02C01	2019-02-03T06:13:42	12.8432	-24.0558	3.4503	3.3446	32.4933	1409.7	1396	34.7716	27.6703	1421.24	0.0458	173.267	178.06	95.5965	99.82	703.4	0.06294	27.6601
1	64PE449_S02C01	2019-02-03T06:13:42	12.8432	-24.0558	3.4504	3.3446	32.4939	1410.71	1397	34.7718	27.6705	1422.14	0.0523	173.491	178.29	95.5785	99.7	701.02	0.06294	27.6602
1	64PE449_S02C01	2019-02-03T06:13:42	12.8432	-24.0558	3.4504	3.3445	32.4945	1411.72	1398	34.7719	27.6705	1423.06	0.0512	173.445	178.243	95.6161	99.72	696.63	0.06294	27.6603
1	64PE449_S02C01	2019-02-03T06:13:42	12.8432	-24.0558	3.4506	3.3446	32.4951	1412.74	1399	34.772	27.6706	1424.12	0.0488	173.383	178.179	95.6289	99.71	696.76	0.06294	27.6603
1	64PE449_S02C01	2019-02-03T06:13:42	12.8432	-24.0558	3.4508	3.3448	32.4961	1413.75	1400	34.7724	27.671	1425.4	0.0434	173.407	178.204	95.6208	99.71	702.5	0.06294	27.6607
1	64PE449_S02C01	2019-02-03T06:13:42	12.8432	-24.0558	3.4503	3.3442	32.4967	1414.77	1401	34.7731	27.6716	1426.73	0.051	173.525	178.325	95.6162	99.71	713.87	0.06294	27.6613
1	64PE449_S02C01	2019-02-03T06:13:42	12.8432	-24.0558	3.4497	3.3435	32.4968	1415.78	1402	34.7734	27.6718	1427.79	0.0449	173.513	178.313	95.6197	99.72	716.3	0.06294	27.6615
1	64PE449_S02C01	2019-02-03T06:13:42	12.8432	-24.0558	3.4497	3.3435	32.4974	1416.79	1402.99	34.7736	27.672	1428.66	0.0525	173.555	178.356	95.6384	99.71	709.72	0.06294	27.6617
1	64PE449_S02C01	2019-02-03T06:13:42	12.8432	-24.0558	3.4499	3.3435	32.498	1417.81	1404	34.7737	27.6721	1429.45	0.0469	173.514	178.314	95.6515	99.71	696.05	0.06294	27.6618
1	64PE449_S02C01	2019-02-03T06:13:42	12.8432	-24.0558	3.4499	3.3435	32.4986	1418.82	1405	34.7738	27.6722	1430.21	0.0471	173.463	178.261	95.6591	99.7	681.11	0.06294	27.6618
1	64PE449_S02C01	2019-02-03T06:13:42	12.8432	-24.0558	3.4501	3.3435	32.4992	1419.83	1406	34.7739	27.6722	1431	0.0501	173.578	178.379	95.6545	99.71	673.57	0.06294	27.6619
1	64PE449_S02C01	2019-02-03T06:13:42	12.8432	-24.0558	3.45	3.3434	32.4997	1420.84	1407.01	34.774	27.6723	1431.92	0.0479	173.703	178.508	95.6586	52.47	678.41	0.06294	27.662
1	64PE449_S02C01	2019-02-03T06:13:42	12.8432	-24.0558	3.4499	3.3431	32.5002	1421.86	1408	34.7742	27.6726	1433.07	0.0466	173.948	178.76	95.6389	68.31	699.15	0.06294	27.6622
1	64PE449_S02C01	2019-02-03T06:13:42	12.8432	-24.0558	3.4491	3.3423	32.5004	1422.87	1409	34.7749	27.6731	1434.48	0.0453	173.955	178.767	95.6267	100.67	715.03	0.06294	27.6627
1	64PE449_S02C01	2019-02-03T06:13:42	12.8432	-24.0558	3.448	3.3411	32.5003	1423.88	1410	34.7755	27.6737	1435.67	0.0559	174.247	179.067	95.5301	99.72	718.29	0.06294	27.6633
1	64PE449_S02C01	2019-02-03T06:13:42	12.8432	-24.0558	3.4474	3.3405	32.5004	1424.9	1411	34.7757	27.6739	1436.65	0.0617	174.238	179.058	95.72	99.56	715.09	0.06294	27.6635
1	64PE449_S02C01	2019-02-03T06:13:42	12.8432	-24.0558	3.4475	3.3404	32.5009	1425.91	1412	34.7757	27.674	1437.56	0.0512	174.006	178.82	95.7648	98.83	707.76	0.06294	27.6635
1	64PE449_S02C01	2019-02-03T06:13:42	12.8432	-24.0558	3.4475	3.3404	32.5014	1426.92	1413	34.7757	27.674	1438.44	0.0444	174.138	178.955	95.7899	97.74	704.76	0.06294	27.6636
1	64PE449_S02C01	2019-02-03T06:13:42	12.8432	-24.0558	3.4475	3.3402	32.5018	1427.94	1414	34.7757	27.674	1439.38	0.042	174.154	178.972	95.7897	97.07	706.29	0.06294	27.6635
1	64PE449_S02C01	2019-02-03T06:13:42	12.8432	-24.0558	3.4474	3.3401	32.5023	1428.95	1415	34.7759	27.6741	1440.37	0.0449	174.15	178.968	95.7848	95.82	710.76	0.06294	27.6637
1	64PE449_S02C01	2019-02-03T06:13:42	12.8432	-24.0558	3.4463	3.3389	32.5024	1429.96	1416	34.7767	27.6749	1441.37	0.0456	174.545	179.374	95.8004	94.85	710.7	0.06294	27.6644
1	64PE449_S02C01	2019-02-03T06:13:42	12.8432	-24.0558	3.4457	3.3382	32.5029	1430.98	1417	34.7775	27.6756	1442.35	0.0437	174.695	179.528	95.8304	93.55	712.12	0.06294	27.6651
1	64PE449_S02C01	2019-02-03T06:13:42	12.8432	-24.0558	3.4456	3.338	32.5041	1431.99	1418	34.7785	27.6764	1443.31	0.0538	174.788	179.624	95.842	92.86	730.64	0.06294	27.6659
1	64PE449_S02C01	2019-02-03T06:13:42	12.8432	-24.0558	3.4456	3.338	32.5054	1433	1419	34.7794	27.6772	1444.27	0.0504	174.884	179.722	95.8855	92.02	717.64	0.06294	27.6667
1	64PE449_S02C01	2019-02-03T06:13:42	12.8432	-24.0558	3.4451	3.3374	32.5063	1434.02	1420	34.7806	27.6782	1445.27	0.0397	174.951	179.791	95.8975	90.51	712.34	0.06294	27.6677
1	64PE449_S02C01	2019-02-03T06:13:42	12.8432	-24.0558	3.4442	3.3364	32.5069	1435.03	1421	34.7817	27.6792	1446.37	0.039	175.197	180.044	95.8993	89.56	720.1	0.06294	27.6686
1	64PE449_S02C01	2019-02-03T06:13:42	12.8432	-24.0558	3.4442	3.3362	32.5075	1436.04	1422	34.782	27.6794	1447.66	0.0546	175.371	180.223	95.903	88.21	735.69	0.06294	27.6689
1	64PE449_S02C01	2019-02-03T06:13:42	12.8432	-24.0558	3.4441	3.3361	32.5081	1437.06	1422.99	34.7823	27.6796	1448.92	0.0549	175.056	179.9	95.9071	87.48	752.26	0.06294	27.6691
1	64PE449_S02C01	2019-02-03T06:13:42	12.8432	-24.0558	3.4443	3.3362	32.5091	1438.07	1424	34.7827	27.68	1449.92	0.0449	175.027	179.87	95.8881	86.7	763.9	0.06294	27.6694
1	64PE449_S02C01	2019-02-03T06:13:42	12.8432	-24.0558	3.4444	3.3362	32.5101	1439.08	1425	34.7833	27.6804	1450.76	0.0436	175.232	180.081	95.8904	85.82	765.79	0.06294	27.6699
1	64PE449_S02C01	2019-02-03T06:13:42	12.8432	-24.0558	3.4445	3.3363	32.5109	1440.1	1426	34.7836	27.6806	1451.55	0.05	175.309	180.16	95.877	84.98	761.68	0.06294	27.6701
1	64PE449_S02C01	2019-02-03T06:13:42	12.8432	-24.0558	3.4448	3.3364	32.5117	1441.11	1427	34.7838	27.6808	1452.35	0.0506	175.014	179.857	95.8687	83.94	754.11	0.06294	27.6702
1	64PE449_S02C01	2019-02-03T06:13:42	12.8432	-24.0558	3.45	3.3415	32.5184	1442.12	1428	34.7856	27.6817	1453.25	0.0513	174.884	179.723	95.886	83.22	747.03	0.06294	27.6713
1	64PE449_S02C01	2019-02-03T06:13:42	12.8432	-24.0558	3.4569	3.3482	32.527	1443.14	1429	34.7879	27.6829	1454.31	0.0511	174.997	179.84	95.864	81.67	744.16	0.06294	27.6726
1	64PE449_S02C01	2019-02-03T06:13:42	12.8432	-24.0558	3.4597	3.3509	32.5312	1444.15	1430	34.7893	27.6838	1455.55	0.0547	174.84	179.678	95.7347	80.23	739.91	0.06294	27.6735
1	64PE449_S02C01	2019-02-03T06:13:42	12.8432	-24.0558	3.4606	3.3517	32.5335	1445.16	1431	34.7906	27.6847	1456.71	0.056	174.802	179.64	95.613	79.32	729.2	0.06294	27.6744
1	64PE449_S02C01	2019-02-03T06:13:42	12.8432	-24.0558	3.4607	3.3518	32.5347	1446.18	1432	34.7915	27.6855	1457.71	0.0475	174.929	179.77	95.4858	78.63	716.68	0.06294	27.6751
1	64PE449_S02C01	2019-02-03T06:13:42	12.8432	-24.0558	3.4607	3.3516	32.5353	1447.19	1433	34.7918	27.6857	1458.64	0.0475	174.996	179.839	95.417	77.79	711.29	0.06294	27.6753
1	64PE449_S02C01	2019-02-03T06:13:42	12.8432	-24.0558	3.4605	3.3513	32.5356	1448.2	1434	34.7919	27.6859	1459.54	0.0513	175.167	180.015	95.4325	76.64	718.27	0.06294	27.6754
1	64PE449_S02C01	2019-02-03T06:13:42	12.8432	-24.0558	3.4604	3.3511	32.5362	1449.22	1435	34.7922	27.6861	1460.5	0.0583	175.49	180.347	95.4128	75.74	734.97	0.06294	27.6756
1	64PE449_S02C01	2019-02-03T06:13:42	12.8432	-24.0558	3.4604	3.3511	32.5367	1450.23	1436	34.7923	27.6862	1461.52	0.0586	175.47	180.326	95.4294	74.36	753.98	0.06294	27.6757
1	64PE449_S02C01	2019-02-03T06:13:42	12.8432	-24.0558	3.4599	3.3504	32.5379	1451.24	1437	34.7939	27.6875	1462.54	0.0586	175.59	180.45	95.4332	73.43	763.91	0.06294	27.677
1	64PE449_S02C01	2019-02-03T06:13:42	12.8432	-24.0558	3.4594	3.3499	32.5389	1452.26	1438	34.795	27.6885	1463.57	0.0553	175.749	180.613	95.458	72.49	763.26	0.06294	27.6779
1	64PE449_S02C01	2019-02-03T06:13:42	12.8432	-24.0558	3.4595	3.3499	32.5403	1453.27	1439	34.7961	27.6893	1464.66	0.0535	175.971	180.842	95.4712	71.33	758.36	0.06294	27.6787
1	64PE449_S02C01	2019-02-03T06:13:42	12.8432	-24.0558	3.4606	3.3509	32.5427	1454.28	1440	34.7973	27.6902	1465.84	0.0562	175.994	180.865	95.4341	70.29	753.65	0.06294	27.6796
1	64PE449_S02C01	2019-02-03T06:13:42	12.8432	-24.0558	3.4613	3.3515	32.5444	1455.3	1441	34.7981	27.6908	1467.03	0.0489	176.157	181.033	95.4868	69.29	748.12	0.06294	27.6802
1	64PE449_S02C01	2019-02-03T06:13:42	12.8432	-24.0558	3.462	3.3521	32.5465	1456.31	1442	34.7993	27.6917	1468.08	0.0436	176.212	181.09	95.5723	68.25	746.34	0.06294	27.6811
1	64PE449_S02C01	2019-02-03T06:13:42	12.8432	-24.0558	3.4623	3.3523	32.5476	1457.32	1443	34.7998	27.6921	1469.02	0.0439	175.997	180.869	95.6383	67.36	740.92	0.06294	27.6814
1	64PE449_S02C01	2019-02-03T06:13:42	12.8432	-24.0558	3.4624	3.3523	32.5482	1458.34	1444	34.7999	27.6922	1469.87	0.0462	176.12	180.995	95.6843	66.63	734.16	0.06294	27.6815
1	64PE449_S02C01	2019-02-03T06:13:42	12.8432	-24.0558	3.4626	3.3525	32.5488	1459.35	1445	34.7999	27.6921	1470.67	0.0523	176.424	181.308	95.6983	65.9	726.53	0.06294	27.6815
1	64PE449_S02C01	2019-02-03T06:13:42	12.8432	-24.0558	3.4629	3.3527	32.5497	1460.36	1446	34.8002	27.6924	1471.46	0.0519	176.434	181.318	95.6864	64.85	720.71	0.06294	27.6817
1	64PE449_S02C01	2019-02-03T06:13:42	12.8432	-24.0558	3.4635	3.3531	32.5517	1461.38	1447	34.8014	27.6932	1472.3	0.0555	176.302	181.182	95.679	63.85	717.63	0.06294	27.6826
1	64PE449_S02C01	2019-02-03T06:13:42	12.8432	-24.0558	3.4643	3.3538	32.5537	1462.39	1448	34.8025	27.6941	1473.25	0.0497	176.275	181.155	95.6443	62.38	718.76	0.06294	27.6834
1	64PE449_S02C01	2019-02-03T06:13:42	12.8432	-24.0558	3.464	3.3535	32.555	1463.41	1449	34.8038	27.6951	1474.38	0.0474	176.267	181.147	95.5894	61.25	729.51	0.06294	27.6844
1	64PE449_S02C01	2019-02-03T06:13:42	12.8432	-24.0558	3.4626	3.352	32.5543	1464.42	1450	34.8041	27.6955	1475.75	0.0518	176.31	181.191	95.5498	60.06	749.98	0.06294	27.6848
1	64PE449_S02C01	2019-02-03T06:13:42	12.8432	-24.0558	3.4623	3.3516	32.5549	1465.43	1451	34.8045	27.6959	1477.01	0.0458	176.359	181.242	95.451	59.06	769.55	0.06294	27.6851
1	64PE449_S02C01	2019-02-03T06:13:42	12.8432	-24.0558	3.4624	3.3516	32.5558	1466.44	1452	34.805	27.6963	1478.09	0.0532	176.376	181.259	95.384	58.31	779.63	0.06294	27.6855
1	64PE449_S02C01	2019-02-03T06:13:42	12.8432	-24.0558	3.4613	3.3505	32.5554	1467.46	1453	34.8052	27.6965	1479.05	0.0562	176.383	181.266	95.3773	57.35	774.5	0.06294	27.6857
1	64PE449_S02C01	2019-02-03T06:13:42	12.8432	-24.0558	3.4616	3.3507	32.5562	1468.47	1454	34.8054	27.6966	1479.93	0.0603	176.439	181.324	95.3355	56.53	759.85	0.06294	27.6858
1	64PE449_S02C01	2019-02-03T06:13:42	12.8432	-24.0558	3.4614	3.3503	32.5567	1469.49	1455	34.8057	27.697	1480.8	0.0546	176.72	181.613	95.3161	55.6	744.7	0.06294	27.6862
1	64PE449_S02C01	2019-02-03T06:13:42	12.8432	-24.0558	3.4614	3.3503	32.5574	1470.5	1456	34.806	27.6972	1481.79	0.0454	176.925	181.823	95.3402	54.3	739.39	0.06294	27.6864
1	64PE449_S02C01	2019-02-03T06:13:42	12.8432	-24.0558	3.4621	3.3509	32.559	1471.51	1457	34.8066	27.6976	1482.95	0.0519	176.853	181.749	95.3178	53.19	741.34	0.06294	27.6868
1	64PE449_S02C01	2019-02-03T06:13:42	12.8432	-24.0558	3.4625	3.3512	32.5602	1472.53	1457.99	34.8071	27.698	1484.12	0.0487	176.804	181.699	95.309	52.15	736.23	0.06294	27.6872
1	64PE449_S02C01	2019-02-03T06:13:42	12.8432	-24.0558	3.463	3.3516	32.5614	1473.54	1459	34.8075	27.6983	1485.09	0.0538	176.83	181.726	95.3478	51.18	726.95	0.06294	27.6875
1	64PE449_S02C01	2019-02-03T06:13:42	12.8432	-24.0558	3.4631	3.3516	32.5622	1474.55	1460	34.8079	27.6986	1485.96	0.0543	176.84	181.736	95.3766	50.39	721	0.06294	27.6877
1	64PE449_S02C01	2019-02-03T06:13:42	12.8432	-24.0558	3.4625	3.3509	32.5623	1475.57	1461	34.8082	27.6989	1486.81	0.0586	176.883	181.781	95.4121	49.52	720.34	0.06294	27.688
1	64PE449_S02C01	2019-02-03T06:13:42	12.8432	-24.0558	3.462	3.3503	32.5624	1476.58	1462	34.8084	27.6991	1487.71	0.0597	177.13	182.034	95.3911	48.37	723.5	0.06294	27.6882
1	64PE449_S02C01	2019-02-03T06:13:42	12.8432	-24.0558	3.4619	3.3501	32.563	1477.59	1463	34.8086	27.6993	1488.65	0.0577	177.288	182.197	95.3297	47.26	729.15	0.06294	27.6884
1	64PE449_S02C01	2019-02-03T06:13:42	12.8432	-24.0558	3.4624	3.3505	32.5647	1478.61	1464	34.8096	27.7	1489.64	0.0536	177.488	182.402	95.2878	46.17	739.2	0.06294	27.6891
1	64PE449_S02C01	2019-02-03T06:13:42	12.8432	-24.0558	3.4637	3.3517	32.5679	1479.62	1465	34.8115	27.7014	1490.68	0.048	177.415	182.328	95.2971	45.11	747.86	0.06294	27.6905
1	64PE449_S02C01	2019-02-03T06:13:42	12.8432	-24.0558	3.4641	3.3521	32.5693	1480.63	1466	34.8123	27.702	1491.83	0.0538	177.62	182.539	95.3258	44.03	753.87	0.06294	27.6912
1	64PE449_S02C01	2019-02-03T06:13:42	12.8432	-24.0558	3.4642	3.3521	32.57	1481.65	1467	34.8124	27.7021	1493.19	0.0601	177.577	182.494	95.4111	43.04	768.86	0.06294	27.6913
1	64PE449_S02C01	2019-02-03T06:13:42	12.8432	-24.0558	3.4643	3.3521	32.5707	1482.66	1468	34.8126	27.7023	1494.64	0.049	177.738	182.66	95.4368	41.77	781.26	0.06294	27.6914
1	64PE449_S02C01	2019-02-03T06:13:42	12.8432	-24.0558	3.4644	3.3521	32.5714	1483.68	1469	34.8129	27.7025	1495.76	0.051	177.929	182.856	95.4408	40.91	771.66	0.06294	27.6916
1	64PE449_S02C01	2019-02-03T06:13:42	12.8432	-24.0558	3.4645	3.3521	32.5727	1484.69	1470	34.8138	27.7032	1496.73	0.0447	177.773	182.696	95.4435	40.15	753.99	0.06294	27.6923
1	64PE449_S02C01	2019-02-03T06:13:42	12.8432	-24.0558	3.4648	3.3523	32.5738	1485.7	1471	34.8144	27.7037	1497.64	0.0471	177.879	182.805	95.4392	39.34	733.31	0.06294	27.6927
1	64PE449_S02C01	2019-02-03T06:13:42	12.8432	-24.0558	3.4651	3.3525	32.5746	1486.72	1472	34.8145	27.7037	1498.51	0.0412	178.014	182.944	95.4289	38.3	720.57	0.06294	27.6928
1	64PE449_S02C01	2019-02-03T06:13:42	12.8432	-24.0558	3.4654	3.3528	32.5754	1487.73	1473	34.8145	27.7037	1499.34	0.0445	177.985	182.914	95.4479	37.35	717.98	0.06294	27.6928
1	64PE449_S02C01	2019-02-03T06:13:42	12.8432	-24.0558	3.4658	3.353	32.5762	1488.74	1474	34.8147	27.7038	1500.17	0.0587	177.974	182.903	95.47	36.3	712.56	0.06294	27.6929
1	64PE449_S02C01	2019-02-03T06:13:42	12.8432	-24.0558	3.466	3.3531	32.577	1489.76	1475	34.8149	27.704	1501.06	0.0578	178.002	182.931	95.4966	35.23	711.41	0.06294	27.6931
1	64PE449_S02C01	2019-02-03T06:13:42	12.8432	-24.0558	3.4661	3.3532	32.5776	1490.77	1476	34.815	27.704	1502.08	0.0509	178.065	182.996	95.5068	34.04	685.46	0.06294	27.6931
1	64PE449_S02C01	2019-02-03T06:13:42	12.8432	-24.0558	3.4663	3.3532	32.5782	1491.78	1477	34.815	27.7041	1503.3	0.048	177.997	182.926	95.5251	32.94	708.64	0.06294	27.6932
1	64PE449_S02C01	2019-02-03T06:13:42	12.8432	-24.0558	3.4664	3.3533	32.5788	1492.8	1478	34.8151	27.7041	1504.73	0.0593	177.882	182.808	95.5288	31.76	757.37	0.06294	27.6932
1	64PE449_S02C01	2019-02-03T06:13:42	12.8432	-24.0558	3.4666	3.3534	32.5794	1493.81	1479	34.8151	27.7041	1506.73	0.0634	177.93	182.857	95.5405	30.51	759.02	0.06294	27.6932
1	64PE449_S02C01	2019-02-03T06:13:42	12.8432	-24.0558	3.4667	3.3534	32.5802	1494.82	1480	34.8153	27.7043	1509.11	0.0607	178.082	183.014	95.5325	29.51	741.43	0.06294	27.6933
1	64PE449_S02C01	2019-02-03T06:13:42	12.8432	-24.0558	3.4666	3.3532	32.5808	1495.84	1481	34.8157	27.7047	1510.58	0.0555	178.204	183.139	95.5729	28.61	733.79	0.06294	27.6937
1	64PE449_S02C01	2019-02-03T06:13:42	12.8432	-24.0558	3.4655	3.352	32.5811	1496.85	1482	34.8169	27.7057	1512.02	0.0507	178.506	183.45	95.6435	27.67	716.61	0.06294	27.6946
1	64PE449_S02C01	2019-02-03T06:13:42	12.8432	-24.0558	3.4648	3.3512	32.5816	1497.86	1483	34.8177	27.7064	1513.66	0.0512	178.507	183.451	95.6939	26.53	714.72	0.06294	27.6953
1	64PE449_S02C01	2019-02-03T06:13:42	12.8432	-24.0558	3.4638	3.3502	32.5821	1498.88	1484	34.8188	27.7074	1516.76	0.0594	178.677	183.626	95.6709	25.26	741.83	0.06294	27.6963
1	64PE449_S02C01	2019-02-03T06:13:42	12.8432	-24.0558	3.4637	3.35	32.5826	1499.89	1485	34.819	27.7076	1520.19	0.057	178.759	183.71	95.6675	24.63	801.98	0.06294	27.6965
1	64PE449_S02C01	2019-02-03T06:13:42	12.8432	-24.0558	3.4636	3.3498	32.5831	1500.91	1486	34.8192	27.7077	1521.91	0.0571	178.862	183.816	95.6471	23.43	780.16	0.06294	27.6966
1	64PE449_S02C01	2019-02-03T06:13:42	12.8432	-24.0558	3.4634	3.3495	32.5835	1501.92	1487	34.8194	27.7079	1524.28	0.0523	178.749	183.7	95.608	22.35	741.79	0.06294	27.6968
1	64PE449_S02C01	2019-02-03T06:13:42	12.8432	-24.0558	3.4635	3.3494	32.584	1502.93	1487.99	34.8194	27.7079	1525.93	0.0568	178.621	183.568	95.5955	21.56	718.85	0.06294	27.6968
1	64PE449_S02C01	2019-02-03T06:13:42	12.8432	-24.0558	3.4636	3.3495	32.5845	1503.95	1489	34.8193	27.7079	1527.05	0.0528	178.893	183.848	95.579	20.78	696.2	0.06294	27.6968
1	64PE449_S02C01	2019-02-03T06:13:42	12.8432	-24.0558	3.4629	3.3487	32.585	1504.96	1490.01	34.8203	27.7087	1528.22	0.0539	178.93	183.886	95.5739	19.83	694.39	0.06294	27.6976
1	64PE449_S02C01	2019-02-03T06:13:42	12.8432	-24.0558	3.462	3.3478	32.5855	1505.97	1491	34.8211	27.7095	1533.14	0.0576	178.784	183.736	95.5652	18.11	781.83	0.06294	27.6984
1	64PE449_S02C01	2019-02-03T06:13:42	12.8432	-24.0558	3.461	3.3466	32.5857	1506.99	1492	34.8221	27.7104	1536.56	0.0571	179.002	183.96	95.5289	17.45	774.2	0.06294	27.6992
1	64PE449_S02C01	2019-02-03T06:13:42	12.8432	-24.0558	3.4604	3.346	32.5858	1508	1493	34.8223	27.7106	1538.12	0.0501	179.034	183.993	95.4101	16.47	732.27	0.06294	27.6994
1	64PE449_S02C01	2019-02-03T06:13:42	12.8432	-24.0558	3.4591	3.3446	32.5855	1509.02	1494	34.8229	27.7112	1542.12	0.0526	179.015	183.974	95.3572	15.05	710.81	0.06294	27.7
1	64PE449_S02C01	2019-02-03T06:13:42	12.8432	-24.0558	3.4578	3.3432	32.5853	1510.03	1495	34.8235	27.7118	1547.48	0.0529	179.092	184.053	95.3086	14.07	785.53	0.06294	27.7006
1	64PE449_S02C01	2019-02-03T06:13:42	12.8432	-24.0558	3.4567	3.3421	32.5853	1511.04	1496	34.824	27.7124	1549.97	0.0544	179.247	184.212	95.2222	13.41	781.2	0.06294	27.7012
1	64PE449_S02C01	2019-02-03T06:13:42	12.8432	-24.0558	3.4547	3.34	32.5844	1512.06	1497	34.8246	27.713	1552.19	0.0582	179.032	183.992	95.1211	12.23	748.36	0.06294	27.7018
1	64PE449_S02C01	2019-02-03T06:13:42	12.8432	-24.0558	3.4536	3.3388	32.5839	1513.07	1498	34.8247	27.7132	1555.63	0.0556	179.091	184.052	94.9818	11.16	733.18	0.06294	27.702
1	64PE449_S02C01	2019-02-03T06:13:42	12.8432	-24.0558	3.4529	3.3381	32.5838	1514.08	1499	34.8248	27.7134	1558.62	0.0609	179.116	184.078	94.7217	10.29	751.5	0.06294	27.7021
1	64PE449_S02C01	2019-02-03T06:13:42	12.8432	-24.0558	3.4526	3.3377	32.5841	1515.1	1500	34.8249	27.7135	1561.74	0.0624	178.931	183.888	94.2461	9.09	775.11	0.06294	27.7023
1	64PE449_S02C01	2019-02-03T06:13:42	12.8432	-24.0558	3.4526	3.3376	32.5846	1516.11	1501	34.825	27.7136	1564.43	0.0547	178.982	183.94	94.0968	8.29	772.09	0.06294	27.7024
1	64PE449_S02C01	2019-02-03T06:13:42	12.8432	-24.0558	3.4525	3.3374	32.585	1517.12	1502	34.8251	27.7136	1568.7	0.0541	178.938	183.895	94.0056	7.02	744.98	0.06294	27.7024
1	64PE449_S02C01	2019-02-03T06:13:42	12.8432	-24.0558	3.4524	3.3372	32.5854	1518.14	1503	34.8252	27.7137	1571.44	0.0602	179.16	184.123	93.9879	6.36	746.42	0.06294	27.7026
1	64PE449_S02C01	2019-02-03T06:13:42	12.8432	-24.0558	3.4521	3.3368	32.5857	1519.15	1504	34.8255	27.714	1572.86	0.0575	179.192	184.156	93.9978	5.42	743.63	0.06294	27.7028
1	64PE449_S02C01	2019-02-03T06:13:42	12.8432	-24.0558	3.4523	3.3369	32.5864	1520.17	1505	34.8255	27.714	1607.81	0.057	179.15	184.113	93.9661	3.9	743.15	0.06294	27.7028
1	64PE449_S02C01	2019-02-03T06:13:42	12.8432	-24.0558	3.4521	3.3366	32.5868	1521.18	1506.01	34.8257	27.7142	1673.82	0.0513	179.15	184.113	93.9068	3.01	732.81	0.06294	27.703
2	64PE449_S03C07	2019-02-04T19:34:23	13.1268	-24.042	17.4397	17.4382	45.3341	9.058	9	34.9938	25.4045	20.41	1.8098	233.858	239.799	88.2442	99.94	79.883	0.076	25.4041
2	64PE449_S03C07	2019-02-04T19:34:23	13.1268	-24.042	17.4374	17.4357	45.3323	10.064	10	34.994	25.4052	51.775	1.8086	233.98	239.924	88.2401	99.94	80.001	0.15285	25.4047
2	64PE449_S03C07	2019-02-04T19:34:23	13.1268	-24.042	17.4313	17.4295	45.3269	11.071	11.004	34.9942	25.4069	57.595	1.8129	234.177	240.127	88.2729	99.94	79.657	0.16856	25.4064
2	64PE449_S03C07	2019-02-04T19:34:23	13.1268	-24.042	17.4363	17.4342	45.3321	12.077	12.001	34.9939	25.4055	62.973	1.8825	234.176	240.125	88.3091	99.94	79.695	0.13652	25.405
2	64PE449_S03C07	2019-02-04T19:34:23	13.1268	-24.042	17.438	17.4358	45.3342	13.084	12.999	34.9938	25.405	66.006	1.7961	234.055	240.001	88.2571	99.94	79.715	0.11956	25.4046
2	64PE449_S03C07	2019-02-04T19:34:23	13.1268	-24.042	17.4384	17.436	45.3349	14.09	14.002	34.9937	25.4049	68.515	1.7856	233.78	239.719	88.2565	99.94	79.714	0.09311	25.4044
2	64PE449_S03C07	2019-02-04T19:34:23	13.1268	-24.042	17.439	17.4365	45.3362	15.097	14.997	34.9939	25.405	72.716	1.8186	234.297	240.249	88.3097	99.94	79.679	0.07667	25.4044
2	64PE449_S03C07	2019-02-04T19:34:23	13.1268	-24.042	17.4241	17.4214	45.3229	16.103	16	34.9953	25.4096	74.659	1.8375	234.083	240.031	88.2925	99.94	79.714	0.06525	25.4088
2	64PE449_S03C07	2019-02-04T19:34:23	13.1268	-24.042	17.4183	17.4155	45.3179	17.11	17.001	34.9956	25.4113	76.62	1.8318	234.407	240.363	88.2158	99.94	79.714	0.06306	25.4104
2	64PE449_S03C07	2019-02-04T19:34:23	13.1268	-24.042	17.4087	17.4057	45.3093	18.116	17.996	34.9963	25.4142	79.011	1.8315	231.247	237.124	88.2292	99.94	79.811	0.06294	25.4131
2	64PE449_S03C07	2019-02-04T19:34:23	13.1268	-24.042	17.4178	17.4146	45.3179	19.123	18.998	34.9951	25.4111	80.441	1.8097	226.332	232.083	88.1706	99.94	80.582	0.06294	25.4102
2	64PE449_S03C07	2019-02-04T19:34:23	13.1268	-24.042	17.3848	17.3804	45.2887	20.129	19.999	34.9997	25.4229	81.674	1.8156	225.976	231.72	88.2706	99.94	79.267	0.06294	25.4205
2	64PE449_S03C07	2019-02-04T19:34:23	13.1268	-24.042	16.9936	16.9913	44.9293	21.136	20.999	35.0337	25.5422	82.87	1.8552	220.839	226.478	88.2233	99.94	80.089	0.06294	25.5346
2	64PE449_S03C07	2019-02-04T19:34:23	13.1268	-24.042	16.9364	16.9326	44.8642	22.142	22.002	35.0271	25.5511	84.023	1.9222	210.712	216.094	88.3655	99.94	80.609	0.06294	25.5426
2	64PE449_S03C07	2019-02-04T19:34:23	13.1268	-24.042	16.7766	16.7723	44.7135	23.149	23.001	35.0368	25.5964	85.315	2.2876	202.511	207.692	88.5733	99.94	79.713	0.06294	25.5858
2	64PE449_S03C07	2019-02-04T19:34:23	13.1268	-24.042	16.2655	16.2621	44.2294	24.155	24.001	35.0668	25.7386	86.804	2.2904	198.164	203.261	88.656	99.94	79.027	0.06307	25.7213
2	64PE449_S03C07	2019-02-04T19:34:23	13.1268	-24.042	16.0373	16.0333	44.0129	25.162	25.001	35.0762	25.7986	88.474	2.2357	192.627	197.593	88.6544	99.94	80.069	0.06307	25.7804
2	64PE449_S03C07	2019-02-04T19:34:23	13.1268	-24.042	15.9819	15.9778	43.9693	26.168	25.997	35.0821	25.8158	90.294	2.2325	182.44	187.147	89.4906	99.94	79.436	0.06309	25.8006
2	64PE449_S03C07	2019-02-04T19:34:23	13.1268	-24.042	15.9002	15.8959	43.903	27.175	27.002	35.0933	25.8432	91.77	1.8391	176.106	180.655	90.7567	99.95	79.672	0.06308	25.8291
2	64PE449_S03C07	2019-02-04T19:34:23	13.1268	-24.042	15.6007	15.5964	43.6317	28.181	27.998	35.1195	25.9312	93.314	1.3002	173.041	177.525	91.9406	99.96	79.789	0.06306	25.9141
2	64PE449_S03C07	2019-02-04T19:34:23	13.1268	-24.042	15.3887	15.3842	43.4305	29.188	28.999	35.1284	25.9858	94.646	0.951	171.829	176.291	92.5037	99.98	79.671	0.06307	25.9675
2	64PE449_S03C07	2019-02-04T19:34:23	13.1268	-24.042	15.2965	15.292	43.3447	30.194	30.002	35.1315	26.0087	95.869	0.6655	170.774	175.213	93.724	99.99	79.587	0.06306	25.9915
2	64PE449_S03C07	2019-02-04T19:34:23	13.1268	-24.042	15.2175	15.2128	43.2707	31.201	30.999	35.1329	26.0274	97.218	0.4814	170.047	174.47	94.4421	100	79.715	0.06306	26.0115
2	64PE449_S03C07	2019-02-04T19:34:23	13.1268	-24.042	15.1728	15.1679	43.2293	32.207	31.998	35.133	26.0374	98.494	0.4281	169.572	173.985	94.6047	100	79.802	0.06305	26.0231
2	64PE449_S03C07	2019-02-04T19:34:23	13.1268	-24.042	15.1513	15.1462	43.2101	33.214	33.003	35.1322	26.0417	99.701	0.3926	168.59	172.978	94.6803	100	79.674	0.06308	26.029
2	64PE449_S03C07	2019-02-04T19:34:23	13.1268	-24.042	15.1393	15.1341	43.2007	34.221	34.002	35.1315	26.0438	101.124	0.4079	168.099	172.475	94.7682	100	79.713	0.06308	26.033
2	64PE449_S03C07	2019-02-04T19:34:23	13.1268	-24.042	15.1077	15.1024	43.1731	35.227	34.996	35.1325	26.0515	102.757	0.3865	165.197	169.499	94.7756	100	79.714	0.06307	26.0422
2	64PE449_S03C07	2019-02-04T19:34:23	13.1268	-24.042	15.0688	15.0633	43.1382	36.234	35.999	35.1345	26.0617	104.043	0.4	162.803	167.044	94.8453	100	79.714	0.06306	26.0529
2	64PE449_S03C07	2019-02-04T19:34:23	13.1268	-24.042	15.0117	15.0058	43.0862	37.24	37	35.1382	26.0773	105.181	0.3703	160.325	164.504	94.9159	100	79.714	0.06307	26.0682
2	64PE449_S03C07	2019-02-04T19:34:23	13.1268	-24.042	14.8629	14.8575	42.9493	38.247	37.999	35.1486	26.1178	106.287	0.3653	155.443	159.501	94.96	100	79.714	0.06308	26.1075
2	64PE449_S03C07	2019-02-04T19:34:23	13.1268	-24.042	14.8191	14.8131	42.9087	39.254	38.998	35.1504	26.1289	107.327	0.3618	151.268	155.219	94.9383	100	79.714	0.06305	26.1186
2	64PE449_S03C07	2019-02-04T19:34:23	13.1268	-24.042	14.6782	14.6723	42.7806	40.26	40.003	35.1617	26.1682	108.317	0.3448	149.842	153.761	95.0785	100	79.815	0.06307	26.1565
2	64PE449_S03C07	2019-02-04T19:34:23	13.1268	-24.042	14.4052	14.3992	42.5283	41.267	41.003	35.1811	26.2422	109.424	0.3081	149.344	153.261	95.2092	100	79.715	0.06307	26.2267
2	64PE449_S03C07	2019-02-04T19:34:23	13.1268	-24.042	14.2377	14.2316	42.3631	42.273	42.001	35.1812	26.2781	110.724	0.2554	148.991	152.904	95.3456	100	81.334	0.06308	26.2619
2	64PE449_S03C07	2019-02-04T19:34:23	13.1268	-24.042	14.2039	14.1976	42.3299	43.28	42.997	35.1779	26.2828	112.226	0.2304	148.292	152.187	95.4695	100	86.559	0.06306	26.2687
2	64PE449_S03C07	2019-02-04T19:34:23	13.1268	-24.042	14.1829	14.1765	42.3111	44.287	43.998	35.1768	26.2864	113.528	0.2304	146.436	150.283	95.4772	96.62	96.807	0.06305	26.2741
2	64PE449_S03C07	2019-02-04T19:34:23	13.1268	-24.042	14.1592	14.1526	42.2888	45.293	44.999	35.1759	26.2908	114.615	0.2304	143.68	147.456	95.5334	33.83	96.647	0.06306	26.2796
2	64PE449_S03C07	2019-02-04T19:34:23	13.1268	-24.042	14.1386	14.1319	42.2703	46.3	46.002	35.1759	26.2952	115.644	0.212	141.215	144.927	95.5702	42.92	98.159	0.06304	26.2849
2	64PE449_S03C07	2019-02-04T19:34:23	13.1268	-24.042	14.0689	14.062	42.206	47.307	47.002	35.1793	26.3127	116.797	0.2129	140.331	144.022	95.6029	99.23	82.929	0.06306	26.3022
2	64PE449_S03C07	2019-02-04T19:34:23	13.1268	-24.042	13.9017	13.8948	42.0477	48.313	48.001	35.1863	26.3532	118.103	0.217	139.544	143.22	95.605	99.99	88.614	0.06306	26.3412
2	64PE449_S03C07	2019-02-04T19:34:23	13.1268	-24.042	13.8454	13.8384	41.9911	49.32	48.998	35.1834	26.3629	119.453	0.1954	137.802	141.433	95.6403	99.99	82.545	0.06302	26.3516
2	64PE449_S03C07	2019-02-04T19:34:23	13.1268	-24.042	13.8325	13.8253	41.9789	50.326	49.998	35.1819	26.3644	120.632	0.1721	136.798	140.403	95.6796	99.97	84.627	0.06306	26.3544
2	64PE449_S03C07	2019-02-04T19:34:23	13.1268	-24.042	13.8028	13.7955	41.9524	51.333	50.999	35.1829	26.3715	121.721	0.1635	135.804	139.384	95.7386	99.96	97.918	0.06306	26.362
2	64PE449_S03C07	2019-02-04T19:34:23	13.1268	-24.042	13.752	13.7445	41.9021	52.34	52.003	35.1819	26.3813	122.755	0.1583	134.763	138.317	95.7602	99.95	87.208	0.06302	26.3719
2	64PE449_S03C07	2019-02-04T19:34:23	13.1268	-24.042	13.7203	13.7126	41.8725	53.346	53	35.1821	26.3881	123.885	0.1593	134.06	137.596	95.7587	64.14	82.379	0.06305	26.3792
2	64PE449_S03C07	2019-02-04T19:34:23	13.1268	-24.042	13.6777	13.6702	41.8316	54.353	54.001	35.1819	26.3968	125.06	0.1534	132.959	136.468	95.7814	14.47	81.282	0.06304	26.3883
2	64PE449_S03C07	2019-02-04T19:34:23	13.1268	-24.042	13.6464	13.6385	41.8002	55.36	55.001	35.1803	26.4021	126.291	0.1482	132.394	135.888	95.8072	76.99	78.916	0.06302	26.394
2	64PE449_S03C07	2019-02-04T19:34:23	13.1268	-24.042	13.6203	13.6123	41.776	56.366	55.999	35.1802	26.4075	127.635	0.1445	130.364	133.806	95.8281	100.09	79.22	0.06304	26.4
2	64PE449_S03C07	2019-02-04T19:34:23	13.1268	-24.042	13.5916	13.5835	41.7479	57.373	56.998	35.1793	26.4127	128.883	0.1474	126.553	129.895	95.8345	99.91	78.889	0.06304	26.4057
2	64PE449_S03C07	2019-02-04T19:34:23	13.1268	-24.042	13.5832	13.5749	41.7404	58.38	57.998	35.1788	26.4141	129.951	0.1442	124.785	128.08	95.8392	99.89	78.432	0.06304	26.4075
2	64PE449_S03C07	2019-02-04T19:34:23	13.1268	-24.042	13.5113	13.5029	41.6723	59.386	59.003	35.1814	26.431	130.97	0.1361	124.262	127.545	95.8554	99.89	78.993	0.06304	26.4237
2	64PE449_S03C07	2019-02-04T19:34:23	13.1268	-24.042	13.4546	13.4462	41.6158	60.393	60.003	35.1802	26.4417	132.114	0.1319	124.158	127.44	95.8721	99.88	79.087	0.06306	26.4342
2	64PE449_S03C07	2019-02-04T19:34:23	13.1268	-24.042	13.4373	13.4287	41.5986	61.4	60.999	35.1786	26.4441	133.53	0.128	123.489	126.754	95.8765	99.85	79.082	0.06303	26.4372
2	64PE449_S03C07	2019-02-04T19:34:23	13.1268	-24.042	13.4311	13.4224	41.5928	62.407	61.998	35.1773	26.4444	134.872	0.12	123.224	126.482	95.8936	99.83	78.42	0.06305	26.4383
2	64PE449_S03C07	2019-02-04T19:34:23	13.1268	-24.042	13.4266	13.4177	41.589	63.413	62.998	35.1768	26.445	135.958	0.1291	123.335	126.596	95.904	99.82	78.429	0.06304	26.4394
2	64PE449_S03C07	2019-02-04T19:34:23	13.1268	-24.042	13.4224	13.4134	41.5856	64.42	63.997	35.1765	26.4456	136.953	0.1251	123.06	126.314	95.9219	99.82	78.429	0.06304	26.4404
2	64PE449_S03C07	2019-02-04T19:34:23	13.1268	-24.042	13.4181	13.4089	41.5821	65.427	65.001	35.1762	26.4463	137.905	0.1219	122.529	125.769	95.9067	99.81	78.429	0.06302	26.4414
2	64PE449_S03C07	2019-02-04T19:34:23	13.1268	-24.042	13.4154	13.4061	41.5797	66.434	66.005	35.1756	26.4465	138.878	0.1264	122.332	125.567	95.9104	99.8	78.429	0.06303	26.4418
2	64PE449_S03C07	2019-02-04T19:34:23	13.1268	-24.042	13.4117	13.4022	41.5766	67.44	67.002	35.1753	26.447	139.994	0.1324	122.565	125.806	95.9203	99.8	78.429	0.06304	26.4427
2	64PE449_S03C07	2019-02-04T19:34:23	13.1268	-24.042	13.4051	13.3956	41.5704	68.447	68.002	35.1746	26.4478	141.318	0.1228	122.251	125.484	95.9134	99.8	78.429	0.06303	26.4438
2	64PE449_S03C07	2019-02-04T19:34:23	13.1268	-24.042	13.4056	13.3959	41.5713	69.454	68.996	35.1742	26.4474	142.811	0.1186	121.56	124.775	95.9147	73.57	78.429	0.06303	26.4438
2	64PE449_S03C07	2019-02-04T19:34:23	13.1268	-24.042	13.3998	13.3899	41.5663	70.46	69.999	35.1741	26.4486	144.044	0.1139	121.014	124.214	95.9192	57.46	78.429	0.06302	26.445
2	64PE449_S03C07	2019-02-04T19:34:23	13.1268	-24.042	13.3916	13.3816	41.5586	71.467	70.998	35.174	26.4502	145.094	0.1192	120.404	123.588	95.9138	99.4	78.482	0.06302	26.4466
2	64PE449_S03C07	2019-02-04T19:34:23	13.1268	-24.042	13.3844	13.3743	41.552	72.474	72.002	35.1738	26.4516	146.107	0.1226	119.72	122.886	95.9185	99.78	78.48	0.06302	26.4481
2	64PE449_S03C07	2019-02-04T19:34:23	13.1268	-24.042	13.3755	13.3652	41.5437	73.481	73.001	35.1738	26.4534	147.218	0.1185	119.367	122.524	95.8936	99.78	78.43	0.06301	26.4499
2	64PE449_S03C07	2019-02-04T19:34:23	13.1268	-24.042	13.3622	13.3517	41.5307	74.487	74.003	35.1733	26.4558	148.44	0.1174	117.275	120.377	95.8959	95.64	78.47	0.06302	26.4523
2	64PE449_S03C07	2019-02-04T19:34:23	13.1268	-24.042	13.3483	13.3378	41.5174	75.494	74.999	35.1731	26.4585	149.909	0.1247	115.283	118.333	95.9152	43.02	78.428	0.06301	26.455
2	64PE449_S03C07	2019-02-04T19:34:23	13.1268	-24.042	13.312	13.3013	41.4834	76.501	75.996	35.1747	26.4672	151.251	0.1312	114.776	117.813	95.8942	100.68	78.289	0.06301	26.4631
2	64PE449_S03C07	2019-02-04T19:34:23	13.1268	-24.042	13.289	13.2782	41.46	77.508	77.002	35.1736	26.471	152.332	0.1291	113.466	116.469	95.8496	99.76	78.547	0.063	26.4668
2	64PE449_S03C07	2019-02-04T19:34:23	13.1268	-24.042	13.2715	13.2606	41.4427	78.515	78.001	35.1729	26.4741	153.359	0.1214	112.928	115.917	95.9076	99.75	78.467	0.06301	26.4698
2	64PE449_S03C07	2019-02-04T19:34:23	13.1268	-24.042	13.2557	13.2446	41.4275	79.521	79.002	35.1728	26.4772	154.491	0.1135	112.301	115.274	95.911	99.73	78.429	0.06299	26.4729
2	64PE449_S03C07	2019-02-04T19:34:23	13.1268	-24.042	13.2407	13.2295	41.4128	80.528	79.999	35.1722	26.4799	155.726	0.1038	111.681	114.638	95.9185	99.72	78.593	0.063	26.4755
2	64PE449_S03C07	2019-02-04T19:34:23	13.1268	-24.042	13.2224	13.2111	41.3947	81.535	81.002	35.1716	26.4831	156.941	0.1018	111.149	114.092	95.9192	99.72	78.446	0.063	26.4788
2	64PE449_S03C07	2019-02-04T19:34:23	13.1268	-24.042	13.2054	13.1939	41.3775	82.542	82.001	35.1705	26.4858	158.299	0.1058	110.496	113.422	95.9162	99.71	77.98	0.06299	26.4815
2	64PE449_S03C07	2019-02-04T19:34:23	13.1268	-24.042	13.1934	13.1818	41.3658	83.549	82.995	35.1699	26.4878	159.669	0.1203	110.155	113.072	95.9285	99.7	78.447	0.06299	26.4835
2	64PE449_S03C07	2019-02-04T19:34:23	13.1268	-24.042	13.1854	13.1737	41.358	84.555	84.001	35.1693	26.489	160.791	0.112	110.187	113.105	95.9071	99.69	78.901	0.063	26.4848
2	64PE449_S03C07	2019-02-04T19:34:23	13.1268	-24.042	13.1798	13.1679	41.3529	85.562	85.002	35.169	26.4899	161.93	0.1076	109.639	112.543	95.9192	99.68	79.348	0.06297	26.4859
2	64PE449_S03C07	2019-02-04T19:34:23	13.1268	-24.042	13.1769	13.1649	41.3504	86.569	86	35.1685	26.4902	163.224	0.1112	108.602	111.478	95.9158	99.68	78.371	0.06297	26.4863
2	64PE449_S03C07	2019-02-04T19:34:23	13.1268	-24.042	13.1743	13.1622	41.3484	87.576	86.999	35.1684	26.4906	164.56	0.1206	107.916	110.774	95.8951	99.67	77.787	0.06299	26.487
2	64PE449_S03C07	2019-02-04T19:34:23	13.1268	-24.042	13.168	13.1557	41.3424	88.583	87.999	35.1681	26.4917	165.766	0.1191	106.341	109.158	95.9014	99.67	78.975	0.06295	26.488
2	64PE449_S03C07	2019-02-04T19:34:23	13.1268	-24.042	13.1492	13.1368	41.3241	89.59	88.998	35.1679	26.4954	166.872	0.1234	104.119	106.877	95.9013	99.67	78.789	0.06296	26.4915
2	64PE449_S03C07	2019-02-04T19:34:23	13.1268	-24.042	13.1336	13.1211	41.3096	90.596	90	35.1682	26.4989	167.904	0.1185	102.725	105.447	95.8946	99.66	78.032	0.06295	26.4948
2	64PE449_S03C07	2019-02-04T19:34:23	13.1268	-24.042	13.1115	13.0989	41.2885	91.603	91.006	35.1685	26.5036	168.939	0.1109	102.2	104.908	95.8901	99.66	78.342	0.06296	26.4993
2	64PE449_S03C07	2019-02-04T19:34:23	13.1268	-24.042	13.0769	13.0642	41.2544	92.61	92.002	35.1682	26.5103	170.222	0.1156	101.515	104.206	95.8937	99.65	78.426	0.06295	26.5056
2	64PE449_S03C07	2019-02-04T19:34:23	13.1268	-24.042	13.0664	13.0535	41.2441	93.617	92.999	35.1674	26.5118	171.981	0.1124	100.48	103.143	95.8874	99.63	78.429	0.06295	26.5074
2	64PE449_S03C07	2019-02-04T19:34:23	13.1268	-24.042	13.0522	13.0391	41.2307	94.624	93.995	35.1672	26.5146	173.548	0.1106	99.519	102.157	95.8844	99.62	78.429	0.06294	26.5102
2	64PE449_S03C07	2019-02-04T19:34:23	13.1268	-24.042	13.0441	13.0309	41.2231	95.631	94.997	35.1669	26.516	174.627	0.1146	97.975	100.572	95.8705	99.61	78.429	0.06294	26.5117
2	64PE449_S03C07	2019-02-04T19:34:23	13.1268	-24.042	13.0432	13.0299	41.2228	96.638	96.002	35.1668	26.5161	175.568	0.1095	96.035	98.5811	95.8749	99.6	78.546	0.06294	26.512
2	64PE449_S03C07	2019-02-04T19:34:23	13.1268	-24.042	13.0355	13.0221	41.2161	97.644	97.001	35.1672	26.518	176.484	0.1016	94.455	96.9594	95.8937	99.6	78.431	0.06294	26.5139
2	64PE449_S03C07	2019-02-04T19:34:23	13.1268	-24.042	13.0132	12.9996	41.1955	98.651	98.003	35.1681	26.5232	177.509	0.1015	93.683	96.1674	95.8736	99.6	78.429	0.06294	26.5188
2	64PE449_S03C07	2019-02-04T19:34:23	13.1268	-24.042	12.979	12.9654	41.1625	99.658	99.003	35.1683	26.5303	178.744	0.1087	92.902	95.3663	95.8846	99.58	78.429	0.06294	26.5255
2	64PE449_S03C07	2019-02-04T19:34:23	13.1268	-24.042	12.958	12.9442	41.1414	100.665	100	35.1673	26.5338	180.307	0.1134	92.396	94.8472	95.901	99.57	78.427	0.06294	26.529
2	64PE449_S03C07	2019-02-04T19:34:23	13.1268	-24.042	12.944	12.9301	41.1278	101.672	100.996	35.1667	26.5361	181.78	0.1102	92.434	94.8864	95.902	99.56	77.624	0.06295	26.5314
2	64PE449_S03C07	2019-02-04T19:34:23	13.1268	-24.042	12.9399	12.9258	41.1238	102.679	101.997	35.1661	26.5365	182.939	0.1023	92.56	95.0158	95.8838	99.55	78.482	0.06294	26.532
2	64PE449_S03C07	2019-02-04T19:34:23	13.1268	-24.042	12.9387	12.9245	41.1231	103.686	102.999	35.1658	26.5366	183.925	0.0954	92.602	95.0589	95.8953	99.55	79.43	0.06294	26.5322
2	64PE449_S03C07	2019-02-04T19:34:23	13.1268	-24.042	12.9379	12.9236	41.1227	104.693	104	35.1654	26.5365	184.834	0.0967	92.469	94.9224	95.8898	99.55	78.875	0.06294	26.5323
2	64PE449_S03C07	2019-02-04T19:34:23	13.1268	-24.042	12.9367	12.9222	41.1219	105.7	105.001	35.1652	26.5366	185.738	0.1027	91.777	94.2121	95.8992	99.55	78.49	0.06294	26.5325
2	64PE449_S03C07	2019-02-04T19:34:23	13.1268	-24.042	12.9351	12.9205	41.1207	106.707	106.002	35.165	26.5367	186.72	0.1086	90.527	92.9289	95.8618	99.54	78.43	0.06294	26.5327
2	64PE449_S03C07	2019-02-04T19:34:23	13.1268	-24.042	12.9311	12.9163	41.1173	107.713	107.002	35.1649	26.5375	187.77	0.1051	88.993	91.3543	95.8694	99.54	78.429	0.06294	26.5336
2	64PE449_S03C07	2019-02-04T19:34:23	13.1268	-24.042	12.9193	12.9044	41.1062	108.72	108.001	35.165	26.5399	188.937	0.1094	87.966	90.3003	95.8456	99.54	78.459	0.06294	26.5359
2	64PE449_S03C07	2019-02-04T19:34:23	13.1268	-24.042	12.8851	12.8701	41.0719	109.727	109.001	35.1641	26.5462	190.256	0.1095	87.887	90.2197	95.8914	99.54	78.44	0.06294	26.5416
2	64PE449_S03C07	2019-02-04T19:34:23	13.1268	-24.042	12.8638	12.8488	41.0501	110.734	109.998	35.1627	26.5494	191.688	0.11	87.628	89.9541	95.8897	99.53	78.429	0.06294	26.5447
2	64PE449_S03C07	2019-02-04T19:34:23	13.1268	-24.042	12.8566	12.8414	41.0426	111.741	111	35.1617	26.5501	192.941	0.1122	87.098	89.4101	95.8837	99.52	78.429	0.06294	26.5455
2	64PE449_S03C07	2019-02-04T19:34:23	13.1268	-24.042	12.8512	12.8358	41.0374	112.748	111.999	35.1613	26.5508	194.067	0.1164	87.098	89.4101	95.8838	99.52	78.479	0.06294	26.5463
2	64PE449_S03C07	2019-02-04T19:34:23	13.1268	-24.042	12.8397	12.8242	41.0259	113.755	112.998	35.1605	26.5525	195.138	0.1202	86.997	89.3066	95.8882	99.51	78.584	0.06294	26.548
2	64PE449_S03C07	2019-02-04T19:34:23	13.1268	-24.042	12.8345	12.8189	41.0208	114.762	113.999	35.1598	26.5531	196.16	0.113	86.985	89.2943	95.8796	99.51	78.481	0.06294	26.5486
2	64PE449_S03C07	2019-02-04T19:34:23	13.1268	-24.042	12.8302	12.8145	41.0169	115.769	114.998	35.1596	26.5538	197.119	0.1139	87.001	89.3108	95.8675	99.51	78.31	0.06294	26.5493
2	64PE449_S03C07	2019-02-04T19:34:23	13.1268	-24.042	12.8253	12.8094	41.012	116.776	116.002	35.159	26.5543	198.03	0.1231	86.613	88.9126	95.8788	99.51	78.371	0.06294	26.55
2	64PE449_S03C07	2019-02-04T19:34:23	13.1268	-24.042	12.8228	12.8068	41.0096	117.783	117	35.1584	26.5544	198.981	0.1207	86.037	88.3213	95.8683	99.5	78.429	0.06294	26.5501
2	64PE449_S03C07	2019-02-04T19:34:23	13.1268	-24.042	12.8171	12.801	41.0042	118.79	118.003	35.1581	26.5553	200.061	0.1104	85.498	87.7681	95.8855	99.5	78.475	0.06294	26.551
2	64PE449_S03C07	2019-02-04T19:34:23	13.1268	-24.042	12.8003	12.784	40.9879	119.797	118.998	35.1578	26.5585	201.25	0.114	84.535	86.7797	95.8853	99.5	78.428	0.06294	26.554
2	64PE449_S03C07	2019-02-04T19:34:23	13.1268	-24.042	12.7983	12.7818	40.9857	120.804	119.999	35.157	26.5583	202.336	0.1134	82.814	85.013	95.867	99.5	78.326	0.06294	26.5539
2	64PE449_S03C07	2019-02-04T19:34:23	13.1268	-24.042	12.7888	12.7722	40.9773	121.811	120.999	35.1574	26.5605	203.309	0.1114	81.318	83.4775	95.8875	99.5	78.254	0.06294	26.5561
2	64PE449_S03C07	2019-02-04T19:34:23	13.1268	-24.042	12.773	12.7564	40.9618	122.818	121.999	35.157	26.5634	204.219	0.1109	80.388	82.523	95.8765	99.5	78.431	0.06295	26.5587
2	64PE449_S03C07	2019-02-04T19:34:23	13.1268	-24.042	12.758	12.7412	40.9477	123.825	123.001	35.1573	26.5666	205.093	0.1199	79.706	81.8231	95.8828	99.5	78.557	0.06294	26.5618
2	64PE449_S03C07	2019-02-04T19:34:23	13.1268	-24.042	12.74	12.7231	40.9295	124.832	124.003	35.1563	26.5695	206.036	0.1217	79.459	81.5698	95.8687	99.5	79.175	0.06294	26.5644
2	64PE449_S03C07	2019-02-04T19:34:23	13.1268	-24.042	12.7333	12.7162	40.9231	125.839	125.004	35.1559	26.5705	207.124	0.1215	79.351	81.459	95.8624	99.49	78.558	0.06294	26.5656
2	64PE449_S03C07	2019-02-04T19:34:23	13.1268	-24.042	12.7262	12.709	40.9162	126.846	126.001	35.1554	26.5715	208.546	0.1229	78.548	80.6348	95.8433	99.48	78.4	0.06295	26.5667
2	64PE449_S03C07	2019-02-04T19:34:23	13.1268	-24.042	12.7204	12.7031	40.911	127.853	126.994	35.1551	26.5725	210.093	0.1128	76.019	78.0387	95.8575	99.48	78.43	0.06294	26.5678
2	64PE449_S03C07	2019-02-04T19:34:23	13.1268	-24.042	12.7093	12.6918	40.9007	128.86	127.995	35.1552	26.5748	211.18	0.116	73.356	75.3051	95.861	99.48	78.655	0.06294	26.57
2	64PE449_S03C07	2019-02-04T19:34:23	13.1268	-24.042	12.6759	12.6584	40.869	129.867	128.999	35.156	26.5821	212.105	0.1069	71.657	73.5614	95.8448	99.48	78.429	0.06294	26.5768
2	64PE449_S03C07	2019-02-04T19:34:23	13.1268	-24.042	12.6278	12.6102	40.8203	130.874	130	35.1546	26.5905	212.966	0.1079	70.527	72.4019	95.8361	99.47	78.429	0.06294	26.5845
2	64PE449_S03C07	2019-02-04T19:34:23	13.1268	-24.042	12.5953	12.5775	40.7865	131.881	131	35.1525	26.5953	213.812	0.1167	69.002	70.8367	95.8522	99.47	78.516	0.06294	26.5889
2	64PE449_S03C07	2019-02-04T19:34:23	13.1268	-24.042	12.5746	12.5567	40.7646	132.888	132.004	35.1505	26.5978	214.685	0.1144	67.737	69.5382	95.8649	99.46	78.663	0.06294	26.5913
2	64PE449_S03C07	2019-02-04T19:34:23	13.1268	-24.042	12.5642	12.5461	40.754	133.895	133.002	35.1493	26.599	215.645	0.1128	66.622	68.3937	95.8662	99.46	78.771	0.06294	26.5926
2	64PE449_S03C07	2019-02-04T19:34:23	13.1268	-24.042	12.5317	12.5136	40.7206	134.902	134.005	35.1472	26.6038	216.791	0.1067	65.054	66.7843	95.8501	99.45	78.479	0.06294	26.5972
2	64PE449_S03C07	2019-02-04T19:34:23	13.1268	-24.042	12.5032	12.485	40.6911	135.909	134.994	35.1451	26.6078	218.197	0.1079	64.406	66.1193	95.8202	99.44	78.428	0.06294	26.6011
2	64PE449_S03C07	2019-02-04T19:34:23	13.1268	-24.042	12.4551	12.4369	40.6424	136.917	135.998	35.1431	26.6157	219.366	0.1133	64.803	66.5273	95.8267	99.44	78.429	0.06294	26.6086
2	64PE449_S03C07	2019-02-04T19:34:23	13.1268	-24.042	12.4268	12.4085	40.6126	137.924	136.997	35.1405	26.6192	220.333	0.1144	65.095	66.8273	95.8275	99.44	78.626	0.06294	26.612
2	64PE449_S03C07	2019-02-04T19:34:23	13.1268	-24.042	12.4238	12.4053	40.6098	138.931	138.001	35.1398	26.6193	221.204	0.112	65.199	66.9341	95.8179	99.44	79.207	0.06294	26.6124
2	64PE449_S03C07	2019-02-04T19:34:23	13.1268	-24.042	12.4222	12.4036	40.6087	139.938	139.003	35.1393	26.6192	222.082	0.1114	65.306	67.044	95.831	99.44	78.503	0.06294	26.6126
2	64PE449_S03C07	2019-02-04T19:34:23	13.1268	-24.042	12.4196	12.4008	40.6067	140.945	140.004	35.1389	26.6195	223.065	0.1134	65.575	67.3202	95.837	99.44	78.431	0.06294	26.6132
2	64PE449_S03C07	2019-02-04T19:34:23	13.1268	-24.042	12.4183	12.3993	40.6059	141.952	141.005	35.1385	26.6195	224.335	0.123	66.247	68.0101	95.8335	99.44	78.657	0.06294	26.6136
2	64PE449_S03C07	2019-02-04T19:34:23	13.1268	-24.042	12.4161	12.397	40.6044	142.959	141.994	35.1381	26.6196	225.999	0.116	65.746	67.4958	95.8514	99.43	78.646	0.06294	26.6141
2	64PE449_S03C07	2019-02-04T19:34:23	13.1268	-24.042	12.4076	12.3884	40.5965	143.966	142.993	35.1379	26.6211	227.173	0.1143	64.5	66.2167	95.8563	99.43	78.42	0.06294	26.6157
2	64PE449_S03C07	2019-02-04T19:34:23	13.1268	-24.042	12.4021	12.3828	40.5912	144.973	143.997	35.1373	26.6217	228.036	0.112	63.554	65.2456	95.8609	99.44	78.43	0.06294	26.6164
2	64PE449_S03C07	2019-02-04T19:34:23	13.1268	-24.042	12.3969	12.3774	40.5862	145.98	145.001	35.1369	26.6224	228.84	0.1066	62.937	64.6122	95.869	99.44	78.565	0.06294	26.6171
2	64PE449_S03C07	2019-02-04T19:34:23	13.1268	-24.042	12.3933	12.3737	40.5827	146.988	146	35.1363	26.6227	229.641	0.1075	62.661	64.3289	95.8867	99.44	79.023	0.06294	26.6174
2	64PE449_S03C07	2019-02-04T19:34:23	13.1268	-24.042	12.3891	12.3694	40.5791	147.995	147.002	35.1362	26.6234	230.466	0.1043	62.485	64.1482	95.8855	99.44	79.559	0.06294	26.6183
2	64PE449_S03C07	2019-02-04T19:34:23	13.1268	-24.042	12.3853	12.3655	40.5756	149.002	148.003	35.1358	26.6239	231.33	0.1044	62.408	64.0692	95.8799	99.43	79.539	0.06294	26.6188
2	64PE449_S03C07	2019-02-04T19:34:23	13.1268	-24.042	12.3789	12.359	40.5694	150.009	149.007	35.1353	26.6248	232.344	0.1121	62.331	63.9902	95.8524	99.44	79.007	0.06294	26.6197
2	64PE449_S03C07	2019-02-04T19:34:23	13.1268	-24.042	12.3724	12.3523	40.563	151.016	150	35.1345	26.6255	234.005	0.1263	61.282	62.9134	95.8453	99.43	78.48	0.06294	26.6205
2	64PE449_S03C07	2019-02-04T19:34:23	13.1268	-24.042	12.3682	12.348	40.559	152.023	150.992	35.1341	26.626	235.631	0.1246	60.156	61.7574	95.8385	99.43	78.737	0.06294	26.6211
2	64PE449_S03C07	2019-02-04T19:34:23	13.1268	-24.042	12.359	12.3386	40.5505	153.03	151.997	35.1341	26.6278	236.562	0.1337	59.934	61.5296	95.8322	99.43	78.424	0.06294	26.6229
2	64PE449_S03C07	2019-02-04T19:34:23	13.1268	-24.042	12.3531	12.3326	40.5448	154.038	153.001	35.1336	26.6287	237.395	0.1177	58.836	60.4024	95.8323	99.42	79.327	0.06294	26.6237
2	64PE449_S03C07	2019-02-04T19:34:23	13.1268	-24.042	12.3422	12.3216	40.5341	155.045	154.002	35.1332	26.6305	238.247	0.1159	57.595	59.1285	95.725	99.42	79.652	0.06294	26.6253
2	64PE449_S03C07	2019-02-04T19:34:23	13.1268	-24.042	12.3111	12.2903	40.5024	156.052	155.002	35.132	26.6356	239.194	0.1145	56.268	57.7664	95.7267	99.42	79.713	0.06294	26.6299
2	64PE449_S03C07	2019-02-04T19:34:23	13.1268	-24.042	12.2511	12.2303	40.4385	157.059	156.005	35.1269	26.6434	240.298	0.1119	54.819	56.2792	95.8387	99.42	79.37	0.06294	26.6368
2	64PE449_S03C07	2019-02-04T19:34:23	13.1268	-24.042	12.2244	12.2035	40.4096	158.066	156.996	35.1236	26.646	241.581	0.1056	54.677	56.1336	95.8414	99.41	78.399	0.06294	26.6393
2	64PE449_S03C07	2019-02-04T19:34:23	13.1268	-24.042	12.2046	12.1836	40.3889	159.073	157.995	35.1217	26.6483	242.668	0.1082	55.315	56.7887	95.8308	99.41	78.429	0.06294	26.6415
2	64PE449_S03C07	2019-02-04T19:34:23	13.1268	-24.042	12.1802	12.1591	40.3639	160.081	158.997	35.12	26.6518	243.562	0.1088	56.124	57.6194	95.772	99.42	78.497	0.06294	26.6448
2	64PE449_S03C07	2019-02-04T19:34:23	13.1268	-24.042	12.1583	12.1371	40.3403	161.088	159.998	35.1174	26.654	244.355	0.1145	56.98	58.4983	95.7333	99.42	79.64	0.06294	26.6469
2	64PE449_S03C07	2019-02-04T19:34:23	13.1268	-24.042	12.1483	12.127	40.3301	162.095	161.004	35.1163	26.6551	245.118	0.119	57.703	59.2407	95.7104	99.41	79.69	0.06294	26.6481
2	64PE449_S03C07	2019-02-04T19:34:23	13.1268	-24.042	12.1422	12.1207	40.3234	163.102	162.002	35.1149	26.6552	245.929	0.1156	58.098	59.6462	95.7202	99.41	78.977	0.06294	26.6484
2	64PE449_S03C07	2019-02-04T19:34:23	13.1268	-24.042	12.1338	12.1122	40.3151	164.109	163.002	35.114	26.6561	246.813	0.1192	58.255	59.8075	95.7485	99.41	79.535	0.06294	26.6495
2	64PE449_S03C07	2019-02-04T19:34:23	13.1268	-24.042	12.1272	12.1054	40.3082	165.117	164.005	35.1128	26.6565	247.833	0.1242	58.422	59.9789	95.7606	99.41	79.531	0.06294	26.65
2	64PE449_S03C07	2019-02-04T19:34:23	13.1268	-24.042	12.1204	12.0986	40.3014	166.124	165.002	35.1118	26.657	249.291	0.126	58.709	60.2736	95.7977	99.41	78.615	0.06294	26.6508
2	64PE449_S03C07	2019-02-04T19:34:23	13.1268	-24.042	12.109	12.087	40.2899	167.131	165.995	35.1105	26.6583	251.059	0.1202	58.467	60.0253	95.8055	99.41	78.422	0.06294	26.6523
2	64PE449_S03C07	2019-02-04T19:34:23	13.1268	-24.042	12.0921	12.0701	40.2728	168.138	166.996	35.1094	26.6606	252.222	0.11	58.822	60.3899	95.8373	99.41	79.145	0.06294	26.6545
2	64PE449_S03C07	2019-02-04T19:34:23	13.1268	-24.042	12.0807	12.0586	40.2612	169.145	167.997	35.1083	26.6621	253.162	0.114	59.141	60.7175	95.8637	99.41	79.724	0.06294	26.656
2	64PE449_S03C07	2019-02-04T19:34:23	13.1268	-24.042	12.071	12.0487	40.2516	170.153	169	35.1076	26.6634	254.021	0.1182	59.369	60.9516	95.8635	99.41	79.714	0.06294	26.6573
2	64PE449_S03C07	2019-02-04T19:34:23	13.1268	-24.042	12.0549	12.0325	40.2349	171.16	170.001	35.1063	26.6655	254.869	0.1111	59.429	61.0133	95.8854	99.42	79.106	0.06294	26.6592
2	64PE449_S03C07	2019-02-04T19:34:23	13.1268	-24.042	12.0495	12.027	40.2295	172.167	171.001	35.1054	26.6659	255.751	0.1085	59.323	60.9045	95.8921	99.41	78.428	0.06294	26.6597
2	64PE449_S03C07	2019-02-04T19:34:23	13.1268	-24.042	12.0446	12.0219	40.2249	173.174	172.001	35.105	26.6665	256.661	0.1132	59.257	60.8368	95.9081	99.41	78.429	0.06294	26.6605
2	64PE449_S03C07	2019-02-04T19:34:23	13.1268	-24.042	12.0427	12.0199	40.2233	174.182	173.002	35.1045	26.6665	257.628	0.1144	59.346	60.9282	95.8956	99.41	78.59	0.06294	26.6606
2	64PE449_S03C07	2019-02-04T19:34:23	13.1268	-24.042	12.0413	12.0183	40.2223	175.189	173.998	35.1042	26.6666	258.655	0.121	59.466	61.0514	95.9026	99.42	79.451	0.06294	26.6609
2	64PE449_S03C07	2019-02-04T19:34:23	13.1268	-24.042	12.0343	12.0112	40.2158	176.196	174.998	35.104	26.6678	259.634	0.1191	59.686	61.2773	95.929	99.42	79.489	0.06294	26.662
2	64PE449_S03C07	2019-02-04T19:34:23	13.1268	-24.042	12.0226	11.9995	40.2044	177.203	176.002	35.1034	26.6696	260.534	0.1046	59.791	61.3853	95.9134	99.42	78.641	0.06294	26.6638
2	64PE449_S03C07	2019-02-04T19:34:23	13.1268	-24.042	12.0106	11.9873	40.192	178.211	177.003	35.1024	26.6712	261.479	0.1041	59.598	61.1872	95.9386	99.41	78.47	0.06294	26.6652
2	64PE449_S03C07	2019-02-04T19:34:23	13.1268	-24.042	11.9872	11.9638	40.168	179.218	178.001	35.1009	26.6744	262.554	0.1069	59.499	61.0857	95.9503	99.42	79.473	0.06294	26.6682
2	64PE449_S03C07	2019-02-04T19:34:23	13.1268	-24.042	11.9697	11.9462	40.1493	180.225	179	35.0987	26.6761	263.774	0.1034	59.336	60.9185	95.9803	99.42	79.715	0.06294	26.6698
2	64PE449_S03C07	2019-02-04T19:34:23	13.1268	-24.042	11.9646	11.941	40.1442	181.233	180.002	35.0979	26.6765	265.046	0.0972	58.243	59.7964	96.0069	99.41	78.762	0.06294	26.6703
2	64PE449_S03C07	2019-02-04T19:34:23	13.1268	-24.042	11.9515	11.9277	40.1307	182.24	180.997	35.0966	26.678	266.428	0.1096	55.411	56.8889	96.0121	99.42	78.729	0.06294	26.6719
2	64PE449_S03C07	2019-02-04T19:34:23	13.1268	-24.042	11.9403	11.9164	40.1191	183.247	181.997	35.0953	26.6791	267.668	0.1025	53.607	55.0369	96.0271	99.42	79.648	0.06294	26.673
2	64PE449_S03C07	2019-02-04T19:34:23	13.1268	-24.042	11.9273	11.9034	40.106	184.254	182.996	35.0942	26.6808	268.676	0.1047	53.926	55.3645	96.0192	99.41	79.298	0.06294	26.6746
2	64PE449_S03C07	2019-02-04T19:34:23	13.1268	-24.042	11.9187	11.8946	40.0974	185.262	183.999	35.0936	26.682	269.554	0.1048	55.292	56.767	95.9798	99.42	78.714	0.06294	26.6758
2	64PE449_S03C07	2019-02-04T19:34:23	13.1268	-24.042	11.9057	11.8815	40.0839	186.269	185	35.0923	26.6834	270.387	0.1029	55.544	57.0258	95.9197	99.41	78.432	0.06294	26.6772
2	64PE449_S03C07	2019-02-04T19:34:23	13.1268	-24.042	11.8968	11.8725	40.0749	187.276	186.001	35.0914	26.6845	271.23	0.0954	54.55	56.0053	95.8391	99.41	78.729	0.06294	26.6782
2	64PE449_S03C07	2019-02-04T19:34:23	13.1268	-24.042	11.8865	11.8621	40.064	188.284	187.002	35.09	26.6854	272.134	0.1046	53.183	54.6019	95.8139	99.41	79.643	0.06294	26.6791
2	64PE449_S03C07	2019-02-04T19:34:23	13.1268	-24.042	11.8774	11.8528	40.0547	189.291	188.001	35.089	26.6864	273.1	0.1171	52.574	53.9767	95.8494	99.41	79.71	0.06294	26.68
2	64PE449_S03C07	2019-02-04T19:34:23	13.1268	-24.042	11.861	11.8364	40.0379	190.298	188.999	35.0877	26.6884	274.108	0.1131	53.09	54.5065	95.9161	99.41	78.803	0.06294	26.682
2	64PE449_S03C07	2019-02-04T19:34:23	13.1268	-24.042	11.8376	11.8129	40.0137	191.306	190.001	35.0859	26.6916	275.076	0.1094	53.867	55.3044	95.9133	99.41	78.428	0.06294	26.6848
2	64PE449_S03C07	2019-02-04T19:34:23	13.1268	-24.042	11.823	11.7982	39.9975	192.313	191.002	35.0835	26.6924	276.086	0.1163	54.542	55.9975	95.8588	99.41	78.238	0.06294	26.6857
2	64PE449_S03C07	2019-02-04T19:34:23	13.1268	-24.042	11.8157	11.7907	39.99	193.32	192.002	35.0823	26.6929	277.237	0.1189	54.899	56.3641	95.8133	99.41	79.049	0.06294	26.6863
2	64PE449_S03C07	2019-02-04T19:34:23	13.1268	-24.042	11.8119	11.7867	39.9861	194.328	193	35.0813	26.6929	278.597	0.1096	54.687	56.1464	95.8096	99.41	79.671	0.06294	26.6866
2	64PE449_S03C07	2019-02-04T19:34:23	13.1268	-24.042	11.8076	11.7823	39.9819	195.335	193.997	35.0806	26.6932	279.934	0.1168	53.97	55.4103	95.803	99.41	78.772	0.06294	26.687
2	64PE449_S03C07	2019-02-04T19:34:23	13.1268	-24.042	11.8024	11.777	39.9769	196.342	195	35.08	26.6937	281.083	0.11	51.963	53.3498	95.8633	99.41	78.429	0.06294	26.6876
2	64PE449_S03C07	2019-02-04T19:34:23	13.1268	-24.042	11.7962	11.7707	39.9707	197.35	195.999	35.0793	26.6944	282.186	0.1093	49.342	50.6589	95.8848	99.41	78.429	0.06294	26.6883
2	64PE449_S03C07	2019-02-04T19:34:23	13.1268	-24.042	11.7875	11.7619	39.9622	198.357	196.997	35.0787	26.6956	283.216	0.1141	49.837	51.1671	95.8789	99.41	79.273	0.06294	26.6895
2	64PE449_S03C07	2019-02-04T19:34:23	13.1268	-24.042	11.7656	11.7398	39.9403	199.365	197.996	35.0779	26.6992	284.114	0.1111	51.199	52.5656	95.838	99.41	79.522	0.06294	26.6926
2	64PE449_S03C07	2019-02-04T19:34:23	13.1268	-24.042	11.7093	11.6836	39.8812	200.372	199.001	35.0737	26.7065	284.931	0.1077	52	53.3884	95.8216	99.41	78.632	0.06294	26.6992
2	64PE449_S03C07	2019-02-04T19:34:23	13.1268	-24.042	11.6725	11.6467	39.8407	201.379	200.004	35.0688	26.7096	285.779	0.1133	52.302	53.6986	95.709	99.41	78.591	0.06294	26.7018
2	64PE449_S03C07	2019-02-04T19:34:23	13.1268	-24.042	11.6412	11.6153	39.8067	202.387	201.005	35.0648	26.7124	286.771	0.1186	52.478	53.8794	95.6367	99.41	78.731	0.06294	26.7043
2	64PE449_S03C07	2019-02-04T19:34:23	13.1268	-24.042	11.6269	11.6009	39.7909	203.394	201.997	35.0621	26.7131	287.965	0.1228	52.781	54.1905	95.6904	99.41	79.406	0.06294	26.7052
2	64PE449_S03C07	2019-02-04T19:34:23	13.1268	-24.042	11.6193	11.5932	39.7833	204.401	202.998	35.0609	26.7136	289.079	0.1297	52.844	54.2552	95.7265	99.41	79.229	0.06294	26.7059
2	64PE449_S03C07	2019-02-04T19:34:23	13.1268	-24.042	11.6045	11.5782	39.7678	205.409	203.999	35.0592	26.715	290.05	0.1368	52.734	54.1424	95.7461	99.41	78.366	0.06294	26.7075
2	64PE449_S03C07	2019-02-04T19:34:23	13.1268	-24.042	11.5903	11.5639	39.7535	206.416	205.003	35.0581	26.7168	290.998	0.1397	52.746	54.1548	95.7418	99.41	78.428	0.06294	26.7092
2	64PE449_S03C07	2019-02-04T19:34:23	13.1268	-24.042	11.5624	11.5359	39.7241	207.424	206.003	35.0554	26.7199	292.06	0.1239	52.667	54.0739	95.7756	99.41	79.163	0.06294	26.7122
2	64PE449_S03C07	2019-02-04T19:34:23	13.1268	-24.042	11.5515	11.525	39.7125	208.431	207.002	35.0534	26.7205	293.266	0.1116	52.515	53.9178	95.7863	99.41	79.66	0.06294	26.7129
2	64PE449_S03C07	2019-02-04T19:34:23	13.1268	-24.042	11.5473	11.5206	39.7086	209.439	207.999	35.0526	26.7206	294.646	0.1096	52.593	53.9979	95.82	99.41	78.742	0.06294	26.7134
2	64PE449_S03C07	2019-02-04T19:34:23	13.1268	-24.042	11.5401	11.5133	39.7016	210.446	208.996	35.0517	26.7213	295.953	0.1143	52.773	54.1828	95.8118	99.41	78.425	0.06294	26.7143
2	64PE449_S03C07	2019-02-04T19:34:23	13.1268	-24.042	11.5357	11.5088	39.6974	211.453	209.996	35.0511	26.7217	297.002	0.1206	52.827	54.2383	95.8089	99.41	78.43	0.06294	26.7149
2	64PE449_S03C07	2019-02-04T19:34:23	13.1268	-24.042	11.5312	11.5041	39.6932	212.461	210.997	35.0507	26.7222	297.911	0.1195	52.617	54.0227	95.8166	99.41	79.213	0.06294	26.7155
2	64PE449_S03C07	2019-02-04T19:34:23	13.1268	-24.042	11.5286	11.5014	39.6907	213.468	212.003	35.05	26.7222	298.746	0.1137	52.656	54.0627	95.8249	99.41	79.467	0.06294	26.7156
2	64PE449_S03C07	2019-02-04T19:34:23	13.1268	-24.042	11.5278	11.5005	39.6902	214.476	213.003	35.0496	26.7221	299.648	0.1155	52.64	54.0463	95.8392	99.41	78.834	0.06294	26.7156
2	64PE449_S03C07	2019-02-04T19:34:23	13.1268	-24.042	11.522	11.4946	39.6847	215.483	214.002	35.0492	26.7229	300.683	0.1119	52.457	53.8585	95.839	99.41	78.717	0.06294	26.7164
2	64PE449_S03C07	2019-02-04T19:34:23	13.1268	-24.042	11.5127	11.4852	39.6754	216.491	214.999	35.0483	26.7239	301.841	0.118	52.31	53.7076	95.7933	99.41	78.475	0.06294	26.7175
2	64PE449_S03C07	2019-02-04T19:34:23	13.1268	-24.042	11.4995	11.4718	39.6618	217.498	216	35.0471	26.7254	302.943	0.1202	51.951	53.3391	95.8597	99.41	78.677	0.06294	26.7189
2	64PE449_S03C07	2019-02-04T19:34:23	13.1268	-24.042	11.4867	11.4589	39.6486	218.506	216.999	35.0458	26.7269	304.013	0.1177	51.51	52.8864	95.8675	99.41	78.426	0.06294	26.7203
2	64PE449_S03C07	2019-02-04T19:34:23	13.1268	-24.042	11.463	11.4352	39.624	219.513	217.998	35.0438	26.7297	305.045	0.1068	51.154	52.521	95.8661	99.41	78.487	0.06294	26.7229
2	64PE449_S03C07	2019-02-04T19:34:23	13.1268	-24.042	11.4587	11.4307	39.6196	220.52	218.999	35.043	26.7299	306.009	0.1034	50.906	52.2664	95.8739	99.41	79.116	0.06294	26.7231
2	64PE449_S03C07	2019-02-04T19:34:23	13.1268	-24.042	11.4522	11.4241	39.6135	221.528	220.004	35.0425	26.7308	306.977	0.1058	50.904	52.2644	95.8833	99.41	78.634	0.06294	26.7241
2	64PE449_S03C07	2019-02-04T19:34:23	13.1268	-24.042	11.4261	11.3979	39.5866	222.535	221.001	35.0406	26.7342	308.077	0.103	51.239	52.6085	95.8744	99.41	78.971	0.06294	26.7271
2	64PE449_S03C07	2019-02-04T19:34:23	13.1268	-24.042	11.4057	11.3774	39.5642	223.543	222.001	35.0376	26.7356	309.315	0.1018	51.517	52.894	95.8515	99.41	78.929	0.06294	26.7284
2	64PE449_S03C07	2019-02-04T19:34:23	13.1268	-24.042	11.3998	11.3715	39.5581	224.55	222.997	35.0363	26.7357	310.602	0.1108	51.481	52.857	95.8704	99.41	78.599	0.06294	26.7287
2	64PE449_S03C07	2019-02-04T19:34:23	13.1268	-24.042	11.3937	11.3652	39.5517	225.558	223.997	35.0352	26.736	311.731	0.1133	51.264	52.6342	95.8931	99.41	78.28	0.06294	26.7292
2	64PE449_S03C07	2019-02-04T19:34:23	13.1268	-24.042	11.3905	11.3619	39.5487	226.566	224.999	35.0346	26.7362	312.742	0.1139	51.388	52.7616	95.9076	99.41	79.148	0.06294	26.7294
2	64PE449_S03C07	2019-02-04T19:34:23	13.1268	-24.042	11.3892	11.3604	39.5477	227.573	225.999	35.0343	26.7362	313.682	0.1172	51.316	52.6877	95.9125	99.41	79.71	0.06294	26.7296
2	64PE449_S03C07	2019-02-04T19:34:23	13.1268	-24.042	11.3725	11.3436	39.5308	228.581	227.003	35.0331	26.7384	314.635	0.1186	51.01	52.3736	95.9176	99.41	79.287	0.06294	26.7316
2	64PE449_S03C07	2019-02-04T19:34:23	13.1268	-24.042	11.3314	11.3026	39.4871	229.588	228.001	35.0291	26.7429	315.703	0.1091	50.715	52.0709	95.9206	99.41	78.578	0.06294	26.7355
2	64PE449_S03C07	2019-02-04T19:34:23	13.1268	-24.042	11.3192	11.2902	39.4737	230.596	228.997	35.0269	26.7435	316.817	0.1089	50.646	52.0001	95.9118	99.41	78.624	0.06294	26.7361
2	64PE449_S03C07	2019-02-04T19:34:23	13.1268	-24.042	11.3067	11.2775	39.4613	231.603	230	35.0261	26.7452	317.824	0.1127	50.563	51.9149	95.9335	99.41	79.135	0.06294	26.7378
2	64PE449_S03C07	2019-02-04T19:34:23	13.1268	-24.042	11.2801	11.251	39.4334	232.611	231.003	35.0235	26.748	318.818	0.1202	50.566	51.9182	95.9294	99.41	78.812	0.06294	26.7403
2	64PE449_S03C07	2019-02-04T19:34:23	13.1268	-24.042	11.2695	11.2402	39.4219	233.618	232.002	35.0216	26.7485	319.942	0.1133	50.673	52.028	95.921	99.41	78.781	0.06294	26.741
2	64PE449_S03C07	2019-02-04T19:34:23	13.1268	-24.042	11.2671	11.2377	39.4197	234.626	232.999	35.0208	26.7484	321.165	0.1188	50.473	51.8227	95.9129	99.41	78.521	0.06294	26.7411
2	64PE449_S03C07	2019-02-04T19:34:23	13.1268	-24.042	11.2609	11.2313	39.4136	235.633	233.999	35.0201	26.749	322.329	0.116	50.467	51.8166	95.8969	99.41	78.429	0.06294	26.7418
2	64PE449_S03C07	2019-02-04T19:34:23	13.1268	-24.042	11.2519	11.2223	39.4046	236.641	235	35.0191	26.7498	323.439	0.1109	50.477	51.8269	95.9001	99.41	78.577	0.06294	26.7427
2	64PE449_S03C07	2019-02-04T19:34:23	13.1268	-24.042	11.241	11.2113	39.3932	237.648	236.002	35.0176	26.7507	324.537	0.1089	50.527	51.8783	95.9189	99.41	79.046	0.06294	26.7437
2	64PE449_S03C07	2019-02-04T19:34:23	13.1268	-24.042	11.2345	11.2046	39.3867	238.656	237	35.0168	26.7513	325.738	0.1078	50.568	51.9204	95.9123	99.41	78.856	0.06294	26.7443
2	64PE449_S03C07	2019-02-04T19:34:23	13.1268	-24.042	11.2277	11.1977	39.3797	239.664	237.998	35.0157	26.7517	326.958	0.1054	50.465	51.8147	95.8918	99.41	78.469	0.06294	26.7448
2	64PE449_S03C07	2019-02-04T19:34:23	13.1268	-24.042	11.2275	11.1974	39.3797	240.671	238.998	35.0153	26.7514	328.024	0.1182	50.241	51.5847	95.8877	99.41	78.716	0.06294	26.7447
2	64PE449_S03C07	2019-02-04T19:34:23	13.1268	-24.042	11.227	11.1967	39.38	241.679	239.999	35.0153	26.7516	328.973	0.1075	50.159	51.5005	95.9163	99.41	78.987	0.06294	26.745
2	64PE449_S03C07	2019-02-04T19:34:23	13.1268	-24.042	11.2181	11.1877	39.3712	242.686	241	35.0148	26.7528	329.857	0.1043	50.147	51.4882	95.9033	99.41	79.072	0.06294	26.7461
2	64PE449_S03C07	2019-02-04T19:34:23	13.1268	-24.042	11.2092	11.1787	39.3619	243.694	242.004	35.0135	26.7535	330.751	0.1084	50.075	51.4143	95.8985	99.41	78.599	0.06294	26.7468
2	64PE449_S03C07	2019-02-04T19:34:23	13.1268	-24.042	11.2061	11.1755	39.359	244.701	243.004	35.0131	26.7537	331.781	0.1087	49.99	51.3271	95.8841	99.41	78.572	0.06294	26.747
2	64PE449_S03C07	2019-02-04T19:34:23	13.1268	-24.042	11.1967	11.166	39.3497	245.709	244.003	35.0123	26.7548	333.118	0.111	49.751	51.0817	95.9089	99.41	78.561	0.06294	26.7481
2	64PE449_S03C07	2019-02-04T19:34:23	13.1268	-24.042	11.1836	11.1527	39.3362	246.717	244.996	35.0109	26.7562	334.816	0.1172	49.553	50.8785	95.8969	99.41	78.495	0.06294	26.7494
2	64PE449_S03C07	2019-02-04T19:34:23	13.1268	-24.042	11.1677	11.1368	39.3201	247.724	245.996	35.0096	26.7582	336.106	0.1218	49.524	50.8488	95.8956	99.41	78.531	0.06294	26.7513
2	64PE449_S03C07	2019-02-04T19:34:23	13.1268	-24.042	11.1671	11.136	39.3195	248.732	246.998	35.009	26.7578	337.123	0.1176	49.424	50.7461	95.9017	99.41	79.209	0.06294	26.7511
2	64PE449_S03C07	2019-02-04T19:34:23	13.1268	-24.042	11.1671	11.1359	39.3201	249.74	247.999	35.009	26.7578	338.053	0.117	49.197	50.5131	95.9221	99.41	78.664	0.06294	26.7511
2	64PE449_S03C07	2019-02-04T19:34:23	13.1268	-24.042	11.163	11.1317	39.3163	250.747	249	35.0086	26.7582	338.936	0.114	49.006	50.317	95.8682	99.41	78.488	0.06294	26.7516
2	64PE449_S03C07	2019-02-04T19:34:23	13.1268	-24.042	11.1564	11.125	39.3097	251.755	250.002	35.0079	26.759	339.837	0.1158	48.789	50.0942	95.8997	99.41	78.545	0.06294	26.7523
2	64PE449_S03C07	2019-02-04T19:34:23	13.1268	-24.042	11.1376	11.1061	39.2909	252.762	251.003	35.007	26.7617	340.824	0.1188	48.681	49.9835	95.8912	99.41	78.535	0.06294	26.7548
2	64PE449_S03C07	2019-02-04T19:34:23	13.1268	-24.042	11.1189	11.0873	39.2713	253.77	252.003	35.0051	26.7636	341.948	0.1176	48.653	49.9548	95.8871	99.41	79.096	0.06294	26.7564
2	64PE449_S03C07	2019-02-04T19:34:23	13.1268	-24.042	11.1029	11.0712	39.2542	254.778	253.001	35.0029	26.7649	343.406	0.1106	48.688	49.9908	95.9074	99.41	78.434	0.06294	26.7577
2	64PE449_S03C07	2019-02-04T19:34:23	13.1268	-24.042	11.0992	11.0673	39.2505	255.785	253.995	35.0021	26.7649	344.911	0.1119	48.566	49.8655	95.9099	99.41	78.474	0.06294	26.7579
2	64PE449_S03C07	2019-02-04T19:34:23	13.1268	-24.042	11.0968	11.0649	39.2485	256.793	254.995	35.0017	26.7651	345.979	0.1108	48.35	49.6438	95.8981	99.41	78.656	0.06294	26.7581
2	64PE449_S03C07	2019-02-04T19:34:23	13.1268	-24.042	11.0958	11.0637	39.2479	257.801	256.003	35.0015	26.7652	346.883	0.1032	48.344	49.6376	95.8925	99.41	78.798	0.06294	26.7582
2	64PE449_S03C07	2019-02-04T19:34:23	13.1268	-24.042	11.0657	11.0337	39.2173	258.808	257.002	34.9997	26.7693	347.847	0.1076	48.497	49.7949	95.9125	99.41	78.644	0.06294	26.762
2	64PE449_S03C07	2019-02-04T19:34:23	13.1268	-24.042	11.0541	11.0218	39.2045	259.816	258.003	34.9976	26.7698	348.927	0.1093	48.552	49.8514	95.8945	99.41	78.702	0.06294	26.7624
2	64PE449_S03C07	2019-02-04T19:34:23	13.1268	-24.042	11.0498	11.0175	39.2004	260.824	259.002	34.9969	26.77	350.263	0.1098	48.587	49.8873	95.9135	99.41	78.562	0.06294	26.7628
2	64PE449_S03C07	2019-02-04T19:34:23	13.1268	-24.042	11.0423	11.0098	39.1928	261.831	259.996	34.996	26.7706	351.843	0.1127	49.018	50.3299	95.9186	99.41	78.777	0.06294	26.7635
2	64PE449_S03C07	2019-02-04T19:34:23	13.1268	-24.042	11.0333	11.0007	39.1837	262.839	260.996	34.995	26.7715	353.045	0.1148	49.649	50.9778	95.9045	99.41	78.473	0.06294	26.7644
2	64PE449_S03C07	2019-02-04T19:34:23	13.1268	-24.042	11.029	10.9963	39.1795	263.847	261.997	34.9944	26.7719	354.009	0.115	50.101	51.4419	95.903	99.41	78.552	0.06294	26.7648
2	64PE449_S03C07	2019-02-04T19:34:23	13.1268	-24.042	11.0114	10.9786	39.1617	264.854	263.002	34.9932	26.7742	354.879	0.1153	50.353	51.7008	95.9047	99.41	78.57	0.06294	26.7668
2	64PE449_S03C07	2019-02-04T19:34:23	13.1268	-24.042	10.9936	10.9607	39.1429	265.862	264.003	34.9912	26.7758	355.79	0.1191	50.386	51.7347	95.9497	99.41	79.046	0.06294	26.7683
2	64PE449_S03C07	2019-02-04T19:34:23	13.1268	-24.042	10.9792	10.9462	39.1277	266.87	265.003	34.9894	26.777	356.843	0.1235	50.479	51.8303	96.0027	99.41	79.055	0.06294	26.7694
2	64PE449_S03C07	2019-02-04T19:34:23	13.1268	-24.042	10.9612	10.9282	39.1089	267.877	266.001	34.9874	26.7787	358.107	0.117	50.508	51.8601	96.0171	99.41	78.477	0.06294	26.771
2	64PE449_S03C07	2019-02-04T19:34:23	13.1268	-24.042	10.951	10.9179	39.0982	268.885	266.999	34.9858	26.7794	359.431	0.1071	50.466	51.8171	96.0291	99.41	78.429	0.06294	26.7717
2	64PE449_S03C07	2019-02-04T19:34:23	13.1268	-24.042	10.9464	10.9131	39.0936	269.893	268.001	34.9849	26.7795	360.711	0.1149	49.981	51.3191	96.0434	99.41	78.72	0.06294	26.772
2	64PE449_S03C07	2019-02-04T19:34:23	13.1268	-24.042	10.9412	10.9078	39.0887	270.901	268.998	34.9844	26.7801	362.095	0.1152	49.403	50.7257	96.0855	99.41	79.08	0.06294	26.7727
2	64PE449_S03C07	2019-02-04T19:34:23	13.1268	-24.042	10.9253	10.8918	39.0736	271.908	269.997	34.984	26.7827	363.337	0.1065	49.409	50.7319	96.0837	99.41	78.472	0.06294	26.7752
2	64PE449_S03C07	2019-02-04T19:34:23	13.1268	-24.042	10.9145	10.8809	39.063	272.916	270.996	34.9834	26.7842	364.38	0.1057	49.641	50.9702	96.1088	99.41	78.432	0.06294	26.7767
2	64PE449_S03C07	2019-02-04T19:34:23	13.1268	-24.042	10.9013	10.8676	39.0496	273.924	272.003	34.9823	26.7857	365.318	0.1112	49.724	51.0555	96.1312	99.41	78.652	0.06294	26.7781
2	64PE449_S03C07	2019-02-04T19:34:23	13.1268	-24.042	10.8879	10.8541	39.0354	274.932	273.005	34.9804	26.7866	366.353	0.1065	49.888	51.2239	96.1485	99.41	79.133	0.06294	26.7789
2	64PE449_S03C07	2019-02-04T19:34:23	13.1268	-24.042	10.8831	10.8492	39.0305	275.939	274.001	34.9794	26.7868	367.7	0.1141	50.136	51.4786	96.1248	99.41	78.674	0.06294	26.7793
2	64PE449_S03C07	2019-02-04T19:34:23	13.1268	-24.042	10.8666	10.8326	39.0136	276.947	274.994	34.9778	26.7885	369.178	0.1143	50.258	51.604	96.1455	99.41	78.424	0.06294	26.7809
2	64PE449_S03C07	2019-02-04T19:34:23	13.1268	-24.042	10.8558	10.8217	39.0022	277.955	275.997	34.9763	26.7893	370.249	0.1081	50.523	51.8761	96.1324	99.41	78.429	0.06294	26.7817
2	64PE449_S03C07	2019-02-04T19:34:23	13.1268	-24.042	10.8397	10.8055	38.9856	278.963	277	34.9748	26.791	371.176	0.097	50.721	52.0795	96.1404	99.41	78.614	0.06294	26.7833
2	64PE449_S03C07	2019-02-04T19:34:23	13.1268	-24.042	10.8255	10.7912	38.9706	279.97	278.002	34.973	26.7922	372.086	0.1063	50.694	52.0518	96.1403	99.41	78.541	0.06294	26.7843
2	64PE449_S03C07	2019-02-04T19:34:23	13.1268	-24.042	10.8161	10.7817	38.9608	280.978	279.001	34.9716	26.7928	373.077	0.1053	50.567	51.9214	96.1327	99.41	78.48	0.06294	26.7849
2	64PE449_S03C07	2019-02-04T19:34:23	13.1268	-24.042	10.8069	10.7724	38.9512	281.986	280.002	34.9703	26.7935	374.155	0.0988	50.598	51.9533	96.142	99.41	78.43	0.06294	26.7857
2	64PE449_S03C07	2019-02-04T19:34:23	13.1268	-24.042	10.7993	10.7647	38.9434	282.994	281.005	34.9691	26.7939	375.5	0.1069	50.983	52.3486	96.1482	99.41	78.525	0.06294	26.7862
2	64PE449_S03C07	2019-02-04T19:34:23	13.1268	-24.042	10.7914	10.7566	38.9353	284.001	281.996	34.9679	26.7944	377.309	0.1115	51.593	52.975	96.1346	99.41	78.424	0.06294	26.7868
2	64PE449_S03C07	2019-02-04T19:34:23	13.1268	-24.042	10.7376	10.703	38.8796	285.009	282.997	34.9639	26.8008	378.714	0.119	51.744	53.1304	96.1399	99.41	78.429	0.06294	26.7926
2	64PE449_S03C07	2019-02-04T19:34:23	13.1268	-24.042	10.699	10.6642	38.8386	286.017	283.999	34.9598	26.8046	379.79	0.1181	51.769	53.1562	96.1296	99.41	78.538	0.06294	26.7957
2	64PE449_S03C07	2019-02-04T19:34:23	13.1268	-24.042	10.6706	10.6358	38.8079	287.025	285.001	34.9559	26.8066	380.774	0.1122	51.755	53.1419	96.1436	99.41	78.75	0.06294	26.7975
2	64PE449_S03C07	2019-02-04T19:34:23	13.1268	-24.042	10.6666	10.6317	38.8034	288.033	286.001	34.9544	26.8062	381.826	0.112	51.679	53.0639	96.1609	99.41	78.479	0.06294	26.7974
2	64PE449_S03C07	2019-02-04T19:34:23	13.1268	-24.042	10.6593	10.6243	38.7961	289.041	287	34.9532	26.8065	382.951	0.1094	51.585	52.9674	96.0803	99.41	78.429	0.06294	26.798
2	64PE449_S03C07	2019-02-04T19:34:23	13.1268	-24.042	10.6474	10.6122	38.784	290.048	288.001	34.9518	26.8076	384.124	0.1031	51.628	53.0116	96.098	99.41	78.473	0.06294	26.7991
2	64PE449_S03C07	2019-02-04T19:34:23	13.1268	-24.042	10.6343	10.5991	38.7706	291.056	288.998	34.9503	26.8087	385.385	0.1067	51.929	53.3207	96.1715	99.41	78.763	0.06294	26.8003
2	64PE449_S03C07	2019-02-04T19:34:23	13.1268	-24.042	10.6176	10.5822	38.7532	292.064	289.998	34.9484	26.8103	386.558	0.1097	52.048	53.443	96.1433	99.41	78.529	0.06294	26.8019
2	64PE449_S03C07	2019-02-04T19:34:23	13.1268	-24.042	10.5983	10.5629	38.7332	293.072	290.997	34.9464	26.8121	387.595	0.1097	52.129	53.5262	96.1428	99.41	78.324	0.06294	26.8036
2	64PE449_S03C07	2019-02-04T19:34:23	13.1268	-24.042	10.5882	10.5527	38.7224	294.08	292.004	34.9446	26.8125	388.574	0.1107	52.125	53.5222	96.1522	99.41	78.426	0.06294	26.8041
2	64PE449_S03C07	2019-02-04T19:34:23	13.1268	-24.042	10.5831	10.5474	38.7171	295.087	293.002	34.9435	26.8126	389.672	0.112	52.055	53.4503	96.1595	99.41	78.521	0.06294	26.8043
2	64PE449_S03C07	2019-02-04T19:34:23	13.1268	-24.042	10.5792	10.5434	38.7133	296.095	294.004	34.9425	26.8125	391.119	0.1095	52.141	53.5386	96.1623	99.41	78.934	0.06294	26.8045
2	64PE449_S03C07	2019-02-04T19:34:23	13.1268	-24.042	10.5765	10.5406	38.7109	297.103	294.995	34.9418	26.8125	393.036	0.1112	52.463	53.8693	96.1508	99.41	78.433	0.06294	26.8048
2	64PE449_S03C07	2019-02-04T19:34:23	13.1268	-24.042	10.5604	10.5244	38.6947	298.111	295.996	34.9405	26.8144	394.358	0.1166	52.605	54.0152	96.1783	99.41	78.477	0.06294	26.8066
2	64PE449_S03C07	2019-02-04T19:34:23	13.1268	-24.042	10.5344	10.4984	38.668	299.119	296.999	34.9385	26.8173	395.396	0.1136	52.801	54.2166	96.1745	99.41	78.712	0.06294	26.8092
2	64PE449_S03C07	2019-02-04T19:34:23	13.1268	-24.042	10.4995	10.4635	38.6312	300.127	297.999	34.9349	26.8207	396.396	0.1104	52.731	54.1448	96.1836	99.41	78.467	0.06294	26.8121
2	64PE449_S03C07	2019-02-04T19:34:23	13.1268	-24.042	10.4914	10.4552	38.6219	301.135	298.998	34.9327	26.8204	397.352	0.1168	52.603	54.0134	96.168	99.41	78.429	0.06294	26.8119
2	64PE449_S03C07	2019-02-04T19:34:23	13.1268	-24.042	10.4875	10.4512	38.6182	302.142	300.001	34.932	26.8206	398.27	0.1134	52.772	54.1869	96.171	99.41	78.429	0.06294	26.8123
2	64PE449_S03C07	2019-02-04T19:34:23	13.1268	-24.042	10.4741	10.4377	38.6047	303.15	301.003	34.9308	26.822	399.213	0.1048	52.739	54.1531	96.1986	99.41	78.64	0.06294	26.8137
2	64PE449_S03C07	2019-02-04T19:34:23	13.1268	-24.042	10.4546	10.4181	38.5842	304.158	302.004	34.9285	26.8237	400.315	0.1006	52.606	54.0166	96.1913	99.41	78.694	0.06294	26.8152
2	64PE449_S03C07	2019-02-04T19:34:23	13.1268	-24.042	10.4461	10.4095	38.5752	305.166	303.001	34.9268	26.8239	401.726	0.1067	53.123	54.5475	96.1217	99.41	78.608	0.06294	26.8156
2	64PE449_S03C07	2019-02-04T19:34:23	13.1268	-24.042	10.4378	10.4012	38.567	306.174	303.998	34.9257	26.8244	403.221	0.113	53.525	54.9603	96.1754	99.41	78.495	0.06294	26.8163
2	64PE449_S03C07	2019-02-04T19:34:23	13.1268	-24.042	10.4323	10.3955	38.5617	307.182	304.998	34.925	26.8249	404.451	0.1127	53.725	55.1657	96.194	99.41	78.427	0.06294	26.8169
2	64PE449_S03C07	2019-02-04T19:34:23	13.1268	-24.042	10.4201	10.3832	38.5495	308.19	305.998	34.9239	26.8262	405.498	0.1097	53.778	55.2202	96.2025	99.41	78.432	0.06294	26.8181
2	64PE449_S03C07	2019-02-04T19:34:23	13.1268	-24.042	10.3832	10.3463	38.5111	309.198	307.002	34.9208	26.8303	406.482	0.1046	53.815	55.2584	96.1883	99.41	78.48	0.06294	26.8217
2	64PE449_S03C07	2019-02-04T19:34:23	13.1268	-24.042	10.3583	10.3213	38.4846	310.206	308.002	34.9176	26.8321	407.562	0.1143	53.86	55.3047	96.1872	99.41	78.521	0.06294	26.8233
2	64PE449_S03C07	2019-02-04T19:34:23	13.1268	-24.042	10.3501	10.313	38.4761	311.214	309.001	34.9162	26.8325	408.8	0.119	53.859	55.3037	96.2089	99.41	78.43	0.06294	26.8238
2	64PE449_S03C07	2019-02-04T19:34:23	13.1268	-24.042	10.3274	10.2903	38.4528	312.221	309.998	34.9139	26.8347	410.103	0.1145	53.885	55.3305	96.2189	99.41	78.429	0.06294	26.826
2	64PE449_S03C07	2019-02-04T19:34:23	13.1268	-24.042	10.3227	10.2854	38.4479	313.229	310.997	34.9129	26.8347	411.256	0.1056	53.841	55.2853	96.2185	99.41	78.429	0.06294	26.8262
2	64PE449_S03C07	2019-02-04T19:34:23	13.1268	-24.042	10.3131	10.2758	38.4385	314.237	311.999	34.9119	26.8356	412.279	0.1005	54.034	55.4836	96.2219	99.41	78.535	0.06294	26.8271
2	64PE449_S03C07	2019-02-04T19:34:23	13.1268	-24.042	10.3002	10.2628	38.4252	315.245	313.002	34.9103	26.8366	413.304	0.1095	53.841	55.2855	96.2371	99.41	78.53	0.06294	26.8282
2	64PE449_S03C07	2019-02-04T19:34:23	13.1268	-24.042	10.2943	10.2567	38.4195	316.253	313.999	34.9096	26.8372	414.415	0.1089	53.31	54.7402	96.2515	99.41	78.626	0.06294	26.8288
2	64PE449_S03C07	2019-02-04T19:34:23	13.1268	-24.042	10.2765	10.2388	38.4014	317.261	315.002	34.9081	26.839	415.471	0.1077	53.126	54.5514	96.2555	99.41	78.429	0.06294	26.8305
2	64PE449_S03C07	2019-02-04T19:34:23	13.1268	-24.042	10.2278	10.1901	38.352	318.269	316.001	34.9052	26.8452	416.562	0.1114	53.207	54.6349	96.256	99.41	78.429	0.06294	26.8361
2	64PE449_S03C07	2019-02-04T19:34:23	13.1268	-24.042	10.19	10.1523	38.312	319.277	317	34.9009	26.8484	417.765	0.1086	53.465	54.8999	96.2511	99.41	78.429	0.06294	26.8389
2	64PE449_S03C07	2019-02-04T19:34:23	13.1268	-24.042	10.168	10.1303	38.2884	320.285	318	34.8975	26.8495	419.016	0.1014	53.881	55.3272	96.2154	99.41	78.557	0.06294	26.8401
2	64PE449_S03C07	2019-02-04T19:34:23	13.1268	-24.042	10.1553	10.1174	38.2753	321.293	318.999	34.8957	26.8503	420.249	0.0938	53.272	54.7019	96.1942	99.41	78.518	0.06294	26.8411
2	64PE449_S03C07	2019-02-04T19:34:23	13.1268	-24.042	10.1402	10.1022	38.2601	322.301	319.998	34.8942	26.8518	421.4	0.107	51.974	53.3691	96.2037	99.41	78.429	0.06294	26.8426
2	64PE449_S03C07	2019-02-04T19:34:23	13.1268	-24.042	10.1168	10.0789	38.2362	323.309	320.999	34.8919	26.854	422.422	0.1089	51.464	52.8455	96.2369	99.41	78.432	0.06294	26.8447
2	64PE449_S03C07	2019-02-04T19:34:23	13.1268	-24.042	10.1128	10.0747	38.2331	324.317	322.001	34.8919	26.8547	423.399	0.1072	51.712	53.1002	96.2153	99.41	78.536	0.06294	26.8457
2	64PE449_S03C07	2019-02-04T19:34:23	13.1268	-24.042	10.0959	10.0577	38.2165	325.325	323	34.8908	26.8569	424.409	0.11	52.191	53.5922	96.1993	99.41	78.481	0.06294	26.8478
2	64PE449_S03C07	2019-02-04T19:34:23	13.1268	-24.042	10.0816	10.0433	38.2016	326.333	324.002	34.8889	26.8578	425.455	0.1139	51.557	52.9412	96.1405	99.41	78.432	0.06294	26.8487
2	64PE449_S03C07	2019-02-04T19:34:23	13.1268	-24.042	10.0721	10.0337	38.1917	327.341	325.001	34.8873	26.8582	426.543	0.1126	50.492	51.8477	96.1488	99.41	78.774	0.06294	26.8493
2	64PE449_S03C07	2019-02-04T19:34:23	13.1268	-24.042	10.0466	10.0082	38.1661	328.349	326	34.8855	26.8612	427.689	0.1137	49.969	51.3108	96.0906	99.41	78.552	0.06294	26.8521
2	64PE449_S03C07	2019-02-04T19:34:23	13.1268	-24.042	9.9983	9.9599	38.1179	329.357	326.998	34.8831	26.8675	428.892	0.121	50.124	51.4702	96.1162	99.41	78.669	0.06294	26.8579
2	64PE449_S03C07	2019-02-04T19:34:23	13.1268	-24.042	9.9698	9.9313	38.0872	330.365	327.997	34.8791	26.8693	429.96	0.1134	50.321	51.6726	96.1245	99.41	78.479	0.06294	26.8595
2	64PE449_S03C07	2019-02-04T19:34:23	13.1268	-24.042	9.9572	9.9186	38.0745	331.373	329	34.8775	26.8702	430.909	0.112	50.794	52.1584	96.0257	99.41	78.429	0.06294	26.8605
2	64PE449_S03C07	2019-02-04T19:34:23	13.1268	-24.042	9.9491	9.9104	38.0664	332.381	330.003	34.8763	26.8707	431.873	0.1144	51.289	52.6667	95.9791	99.41	78.429	0.06294	26.8612
2	64PE449_S03C07	2019-02-04T19:34:23	13.1268	-24.042	9.925	9.8863	38.042	333.389	331.002	34.8743	26.8732	432.973	0.1144	51.96	53.3558	95.9907	99.41	78.475	0.06294	26.8636
2	64PE449_S03C07	2019-02-04T19:34:23	13.1268	-24.042	9.8979	9.8591	38.0135	334.397	331.997	34.8709	26.8751	434.186	0.1044	53.287	54.7186	95.9582	99.41	78.428	0.06294	26.8655
2	64PE449_S03C07	2019-02-04T19:34:23	13.1268	-24.042	9.8574	9.8186	37.9721	335.405	332.999	34.8676	26.8795	435.288	0.1009	54.496	55.9603	95.9833	99.41	78.48	0.06294	26.8694
2	64PE449_S03C07	2019-02-04T19:34:23	13.1268	-24.042	9.8076	9.7688	37.9196	336.413	333.999	34.8622	26.8837	436.295	0.0992	54.941	56.4174	96.0091	99.41	78.429	0.06294	26.873
2	64PE449_S03C07	2019-02-04T19:34:23	13.1268	-24.042	9.7448	9.706	37.8544	337.421	335.004	34.8565	26.8897	437.297	0.1048	55.187	56.6703	95.9935	99.41	78.429	0.06294	26.8784
2	64PE449_S03C07	2019-02-04T19:34:23	13.1268	-24.042	9.7183	9.6795	37.8252	338.429	336.001	34.8514	26.8902	438.406	0.1078	55.307	56.7936	96.0337	99.41	78.429	0.06294	26.879
2	64PE449_S03C07	2019-02-04T19:34:23	13.1268	-24.042	9.7104	9.6715	37.8171	339.437	336.996	34.8496	26.8901	439.573	0.1054	55.627	57.1222	96.0824	99.41	78.429	0.06294	26.8795
2	64PE449_S03C07	2019-02-04T19:34:23	13.1268	-24.042	9.6986	9.6597	37.8052	340.445	337.999	34.8478	26.8907	440.602	0.1035	55.67	57.1664	96.0998	99.41	78.429	0.06294	26.8804
2	64PE449_S03C07	2019-02-04T19:34:23	13.1268	-24.042	9.6912	9.6521	37.7978	341.453	339	34.8465	26.891	441.548	0.1038	55.367	56.8553	96.1103	99.41	78.429	0.06294	26.881
2	64PE449_S03C07	2019-02-04T19:34:23	13.1268	-24.042	9.6709	9.6317	37.7773	342.461	340.003	34.8447	26.8929	442.512	0.1078	54.955	56.4323	96.126	99.41	78.588	0.06294	26.8829
2	64PE449_S03C07	2019-02-04T19:34:23	13.1268	-24.042	9.6573	9.6181	37.7633	343.47	341.002	34.8427	26.8937	443.581	0.1091	55.29	56.7764	96.1549	99.41	78.572	0.06294	26.8838
2	64PE449_S03C07	2019-02-04T19:34:23	13.1268	-24.042	9.6576	9.6182	37.7645	344.478	341.998	34.8426	26.8935	444.692	0.1132	55.978	57.4829	96.1806	99.41	78.478	0.06294	26.8842
2	64PE449_S03C07	2019-02-04T19:34:23	13.1268	-24.042	9.6431	9.6036	37.7501	345.486	343	34.8412	26.8949	445.733	0.1188	56.265	57.7777	96.1528	99.41	78.644	0.06294	26.8856
2	64PE449_S03C07	2019-02-04T19:34:23	13.1268	-24.042	9.6319	9.5924	37.7383	346.494	343.999	34.8392	26.8953	446.77	0.1046	56.688	58.2121	96.0917	99.41	78.479	0.06294	26.8861
2	64PE449_S03C07	2019-02-04T19:34:23	13.1268	-24.042	9.6258	9.5862	37.732	347.502	345.001	34.8379	26.8953	447.811	0.1071	57.237	58.7759	96.1178	99.41	78.483	0.06294	26.8863
2	64PE449_S03C07	2019-02-04T19:34:23	13.1268	-24.042	9.6129	9.5732	37.7193	348.51	346.002	34.8368	26.8966	448.865	0.1105	57.465	59.0101	96.1794	99.41	78.618	0.06294	26.8876
2	64PE449_S03C07	2019-02-04T19:34:23	13.1268	-24.042	9.5874	9.5476	37.6926	349.518	346.999	34.8337	26.8984	450.001	0.1021	57.392	58.9352	96.2022	99.41	78.86	0.06294	26.8893
2	64PE449_S03C07	2019-02-04T19:34:23	13.1268	-24.042	9.5811	9.5413	37.6861	350.526	347.997	34.8322	26.8983	451.082	0.0899	57.488	59.0338	96.2002	99.41	78.58	0.06294	26.8895
2	64PE449_S03C07	2019-02-04T19:34:23	13.1268	-24.042	9.5796	9.5397	37.6848	351.534	348.999	34.8317	26.8981	452.057	0.0915	57.557	59.1047	96.2237	99.41	78.43	0.06294	26.8895
2	64PE449_S03C07	2019-02-04T19:34:23	13.1268	-24.042	9.5787	9.5387	37.6844	352.542	350	34.8313	26.8981	452.985	0.0928	57.527	59.0739	96.2513	99.41	78.429	0.06294	26.8896
2	64PE449_S03C07	2019-02-04T19:34:23	13.1268	-24.042	9.5774	9.5372	37.6835	353.551	351.002	34.831	26.8981	453.943	0.1059	57.478	59.0236	96.2635	99.41	78.536	0.06294	26.8898
2	64PE449_S03C07	2019-02-04T19:34:23	13.1268	-24.042	9.5721	9.5318	37.6789	354.559	351.999	34.8308	26.8988	454.943	0.116	57.619	59.1684	96.2432	99.41	78.59	0.06294	26.8906
2	64PE449_S03C07	2019-02-04T19:34:23	13.1268	-24.042	9.532	9.4917	37.638	355.567	353.001	34.8277	26.903	455.951	0.1112	57.883	59.4397	96.2502	99.41	78.532	0.06294	26.8942
2	64PE449_S03C07	2019-02-04T19:34:23	13.1268	-24.042	9.4895	9.4491	37.5953	356.575	354.001	34.8253	26.9082	456.98	0.1053	57.947	59.5057	96.2339	99.41	78.784	0.06294	26.8987
2	64PE449_S03C07	2019-02-04T19:34:23	13.1268	-24.042	9.4066	9.3666	37.5091	357.583	354.999	34.8176	26.9158	458.043	0.0884	57.973	59.5328	96.1689	99.41	78.429	0.06294	26.9052
2	64PE449_S03C07	2019-02-04T19:34:23	13.1268	-24.042	9.3958	9.3555	37.4966	358.591	355.998	34.8144	26.9151	459.066	0.0955	58.109	59.6724	96.1619	99.41	78.54	0.06294	26.9047
2	64PE449_S03C07	2019-02-04T19:34:23	13.1268	-24.042	9.3985	9.3581	37.4996	359.599	357	34.8138	26.9142	460.004	0.1065	58.487	60.0606	96.1077	99.41	78.432	0.06294	26.9043
2	64PE449_S03C07	2019-02-04T19:34:23	13.1268	-24.042	9.3882	9.3477	37.4903	360.607	358.003	34.8134	26.9156	460.94	0.1107	58.742	60.3225	96.0757	99.41	78.648	0.06294	26.9059
2	64PE449_S03C07	2019-02-04T19:34:23	13.1268	-24.042	9.3589	9.3183	37.4606	361.616	359.001	34.811	26.9185	461.995	0.1042	58.917	60.5024	96.0529	99.41	78.431	0.06294	26.9085
2	64PE449_S03C07	2019-02-04T19:34:23	13.1268	-24.042	9.3106	9.2701	37.4102	362.624	359.999	34.8057	26.9223	463.145	0.1008	58.972	60.559	96.0458	99.41	78.475	0.06294	26.9119
2	64PE449_S03C07	2019-02-04T19:34:23	13.1268	-24.042	9.3062	9.2656	37.4055	363.632	360.998	34.8041	26.9218	464.263	0.1006	59.283	60.8784	96.0469	99.41	78.689	0.06294	26.9118
2	64PE449_S03C07	2019-02-04T19:34:23	13.1268	-24.042	9.3002	9.2595	37.3996	364.64	361.999	34.803	26.9218	465.278	0.0962	59.541	61.1434	96.0555	99.41	78.7	0.06294	26.9122
2	64PE449_S03C07	2019-02-04T19:34:23	13.1268	-24.042	9.2947	9.2539	37.3944	365.648	362.998	34.802	26.922	466.245	0.1023	59.762	61.3704	96.0719	99.41	78.764	0.06294	26.9126
2	64PE449_S03C07	2019-02-04T19:34:23	13.1268	-24.042	9.2901	9.2491	37.39	366.657	364	34.8012	26.9222	467.17	0.0974	60.096	61.7134	96.0797	99.41	78.789	0.06294	26.913
2	64PE449_S03C07	2019-02-04T19:34:23	13.1268	-24.042	9.2785	9.2375	37.3788	367.665	365	34.8003	26.9234	468.06	0.0946	60.539	62.1684	96.0789	99.41	78.737	0.06294	26.9142
2	64PE449_S03C07	2019-02-04T19:34:23	13.1268	-24.042	9.2598	9.2187	37.3598	368.673	366.002	34.7984	26.9249	468.938	0.1003	61.428	63.0814	96.0536	99.41	78.794	0.06294	26.9157
2	64PE449_S03C07	2019-02-04T19:34:23	13.1268	-24.042	9.235	9.1939	37.3344	369.681	367.002	34.796	26.9271	469.89	0.0987	62.621	64.3066	96.014	99.41	79.27	0.06294	26.9176
2	64PE449_S03C07	2019-02-04T19:34:23	13.1268	-24.042	9.1919	9.1508	37.2906	370.689	367.999	34.7927	26.9315	470.915	0.1026	63.524	65.2342	96.031	99.41	79.574	0.06294	26.9215
2	64PE449_S03C07	2019-02-04T19:34:23	13.1268	-24.042	9.1153	9.0743	37.2117	371.698	368.999	34.7861	26.9387	471.923	0.1015	64.471	66.207	96.0541	99.41	79.305	0.06294	26.9276
2	64PE449_S03C07	2019-02-04T19:34:23	13.1268	-24.042	9.0725	9.0316	37.166	372.706	370.001	34.7799	26.9407	472.909	0.1062	65.486	67.2495	96.0243	99.41	79.5	0.06294	26.9294
2	64PE449_S03C07	2019-02-04T19:34:23	13.1268	-24.042	9.0432	9.0021	37.1353	373.714	371	34.7761	26.9425	473.912	0.1041	66.056	67.835	96.0574	99.41	79.593	0.06294	26.931
2	64PE449_S03C07	2019-02-04T19:34:23	13.1268	-24.042	9.0058	8.9647	37.0966	374.722	372.001	34.7719	26.9452	474.884	0.1022	66.115	67.8957	96.0779	99.41	79.453	0.06294	26.9336
2	64PE449_S03C07	2019-02-04T19:34:23	13.1268	-24.042	8.9664	8.9255	37.0549	375.73	373.001	34.7664	26.9471	475.909	0.0947	66.074	67.8537	96.1372	99.41	79.461	0.06294	26.9355
2	64PE449_S03C07	2019-02-04T19:34:23	13.1268	-24.042	8.9583	8.9172	37.0464	376.739	374.001	34.7642	26.9467	477.038	0.0926	66.204	67.9872	96.2102	99.41	79.127	0.06294	26.9356
2	64PE449_S03C07	2019-02-04T19:34:23	13.1268	-24.042	8.9567	8.9155	37.045	377.747	374.998	34.763	26.9461	478.166	0.0948	66.886	68.6876	96.1858	99.42	79.657	0.06294	26.9356
2	64PE449_S03C07	2019-02-04T19:34:23	13.1268	-24.042	8.9559	8.9146	37.0448	378.755	375.997	34.7625	26.9458	479.155	0.1014	68.017	69.8491	96.1863	99.41	79.32	0.06294	26.9358
2	64PE449_S03C07	2019-02-04T19:34:23	13.1268	-24.042	8.9516	8.9101	37.0408	379.763	377.002	34.7616	26.9459	480.077	0.1061	70.404	72.3004	96.0945	99.41	79.465	0.06294	26.9361
2	64PE449_S03C07	2019-02-04T19:34:23	13.1268	-24.042	8.9356	8.8941	37.0247	380.772	378.001	34.7598	26.947	481.006	0.1071	73.691	75.676	96.1439	99.41	79.547	0.06294	26.9374
2	64PE449_S03C07	2019-02-04T19:34:23	13.1268	-24.042	8.9218	8.88	37.0099	381.78	378.998	34.7575	26.9474	481.963	0.1055	76.213	78.266	96.163	99.41	79.619	0.06294	26.9376
2	64PE449_S03C07	2019-02-04T19:34:23	13.1268	-24.042	8.8419	8.8007	36.9268	382.788	379.999	34.7492	26.9535	482.872	0.1027	77.217	79.2974	96.1486	99.41	79.452	0.06294	26.9428
2	64PE449_S03C07	2019-02-04T19:34:23	13.1268	-24.042	8.7929	8.7514	36.8742	383.797	381.001	34.7425	26.956	483.763	0.1072	77.174	79.2534	96.1629	99.42	79.656	0.06294	26.9445
2	64PE449_S03C07	2019-02-04T19:34:23	13.1268	-24.042	8.7481	8.7067	36.8262	384.805	382.001	34.7357	26.9578	484.65	0.1032	76.784	78.853	96.2213	99.42	79.304	0.06294	26.946
2	64PE449_S03C07	2019-02-04T19:34:23	13.1268	-24.042	8.7349	8.6934	36.812	385.813	383.001	34.7328	26.9576	485.57	0.1012	75.834	77.8774	96.3469	99.42	79.008	0.06294	26.9462
2	64PE449_S03C07	2019-02-04T19:34:23	13.1268	-24.042	8.729	8.6874	36.806	386.821	384	34.7312	26.9573	486.534	0.0977	74.439	76.4449	96.3977	99.42	78.806	0.06294	26.9463
2	64PE449_S03C07	2019-02-04T19:34:23	13.1268	-24.042	8.7202	8.6785	36.798	387.83	385	34.7304	26.9581	487.529	0.0923	72.855	74.8183	96.3953	99.43	79.398	0.06294	26.9475
2	64PE449_S03C07	2019-02-04T19:34:23	13.1268	-24.042	8.6983	8.6566	36.7787	388.838	385.999	34.731	26.9619	488.54	0.0909	70.984	72.8971	96.3765	99.43	79.39	0.06294	26.9515
2	64PE449_S03C07	2019-02-04T19:34:23	13.1268	-24.042	8.6838	8.642	36.7657	389.846	387.001	34.7307	26.964	489.521	0.0885	70.062	71.9504	96.396	99.43	79.181	0.06294	26.9537
2	64PE449_S03C07	2019-02-04T19:34:23	13.1268	-24.042	8.6786	8.6368	36.7626	390.855	388.001	34.7315	26.9655	490.526	0.092	69.798	71.6794	96.3848	99.44	79.098	0.06294	26.9556
2	64PE449_S03C07	2019-02-04T19:34:23	13.1268	-24.042	8.675	8.633	36.7613	391.863	389.002	34.7328	26.967	491.601	0.0955	69.635	71.5122	96.3865	99.43	79.514	0.06294	26.9575
2	64PE449_S03C07	2019-02-04T19:34:23	13.1268	-24.042	8.6706	8.6286	36.7573	392.871	390	34.7319	26.9671	492.773	0.1017	69.641	71.5184	96.3618	99.44	79.593	0.06294	26.9579
2	64PE449_S03C07	2019-02-04T19:34:23	13.1268	-24.042	8.6691	8.6269	36.7565	393.879	391	34.7316	26.9671	494.036	0.0945	69.363	71.2329	96.348	99.43	79.238	0.06294	26.9583
2	64PE449_S03C07	2019-02-04T19:34:23	13.1268	-24.042	8.6654	8.6231	36.7535	394.888	391.996	34.7313	26.9674	495.224	0.0898	69.972	71.8584	96.3628	99.42	79.436	0.06294	26.9588
2	64PE449_S03C07	2019-02-04T19:34:23	13.1268	-24.042	8.6647	8.6223	36.7539	395.896	392.995	34.7315	26.9678	496.191	0.084	70.26	72.1542	96.3625	99.42	79.282	0.06294	26.9594
2	64PE449_S03C07	2019-02-04T19:34:23	13.1268	-24.042	8.625	8.5826	36.7163	396.904	393.996	34.7313	26.9737	497.003	0.0892	70.001	71.8886	96.2956	99.42	79.424	0.06294	26.9647
2	64PE449_S03C07	2019-02-04T19:34:23	13.1268	-24.042	8.5863	8.544	36.6758	397.913	394.999	34.7267	26.9762	497.736	0.0909	70.037	71.9257	96.339	99.42	79.46	0.06294	26.9666
2	64PE449_S03C07	2019-02-04T19:34:23	13.1268	-24.042	8.5691	8.5266	36.6578	398.921	396.004	34.7243	26.977	498.452	0.0965	70.464	72.3642	96.3572	99.42	79.065	0.06294	26.9672
2	64PE449_S03C07	2019-02-04T19:34:23	13.1268	-24.042	8.5546	8.512	36.6445	399.93	397.002	34.724	26.979	499.231	0.1003	71.048	72.9641	96.345	99.42	79.242	0.06294	26.9693
2	64PE449_S03C07	2019-02-04T19:34:23	13.1268	-24.042	8.5234	8.4809	36.6141	400.938	398.004	34.7224	26.9826	500.094	0.1019	71.666	73.599	96.3044	99.42	79.135	0.06294	26.9726
2	64PE449_S03C07	2019-02-04T19:34:23	13.1268	-24.042	8.4762	8.4337	36.5659	401.946	399.003	34.718	26.9864	501.112	0.098	72.097	74.0419	96.2436	99.42	78.919	0.06294	26.9759
2	64PE449_S03C07	2019-02-04T19:34:23	13.1268	-24.042	8.4541	8.4116	36.5425	402.955	400.001	34.7141	26.9868	502.35	0.0964	72.902	74.8686	96.1979	99.42	79.193	0.06294	26.9765
2	64PE449_S03C07	2019-02-04T19:34:23	13.1268	-24.042	8.4337	8.3911	36.5221	403.963	400.996	34.7119	26.9882	503.584	0.0955	73.61	75.5959	96.1864	99.42	79.191	0.06294	26.978
2	64PE449_S03C07	2019-02-04T19:34:23	13.1268	-24.042	8.3982	8.3556	36.4861	404.971	401.997	34.7086	26.9911	504.623	0.0929	74.166	76.167	96.2002	99.43	79.041	0.06294	26.9806
2	64PE449_S03C07	2019-02-04T19:34:23	13.1268	-24.042	8.3699	8.3274	36.4567	405.98	402.998	34.7048	26.9925	505.535	0.0964	74.301	76.3058	96.1912	99.42	79.349	0.06294	26.9819
2	64PE449_S03C07	2019-02-04T19:34:23	13.1268	-24.042	8.3428	8.3002	36.4297	406.988	404.003	34.7025	26.9948	506.421	0.0966	73.799	75.7904	96.2206	99.42	79.363	0.06294	26.9841
2	64PE449_S03C07	2019-02-04T19:34:23	13.1268	-24.042	8.3248	8.2821	36.4103	407.996	405.001	34.699	26.9948	507.376	0.0929	73.493	75.4762	96.2799	99.42	79.462	0.06294	26.9843
2	64PE449_S03C07	2019-02-04T19:34:23	13.1268	-24.042	8.3215	8.2787	36.4074	409.005	406.001	34.6981	26.9946	508.396	0.0916	73.533	75.5173	96.3031	99.43	79.242	0.06294	26.9845
2	64PE449_S03C07	2019-02-04T19:34:23	13.1268	-24.042	8.3173	8.2744	36.4048	410.013	406.999	34.6985	26.9956	509.469	0.0887	73.689	75.6776	96.3805	99.43	79.203	0.06294	26.9859
2	64PE449_S03C07	2019-02-04T19:34:23	13.1268	-24.042	8.3039	8.261	36.3917	411.022	407.997	34.697	26.9965	510.516	0.0927	73.874	75.8676	96.3938	99.44	78.665	0.06294	26.9869
2	64PE449_S03C07	2019-02-04T19:34:23	13.1268	-24.042	8.2937	8.2507	36.3816	412.03	408.998	34.6957	26.997	511.446	0.0924	74.674	76.6893	96.3613	99.43	79.192	0.06294	26.9876
2	64PE449_S03C07	2019-02-04T19:34:23	13.1268	-24.042	8.2878	8.2447	36.3762	413.038	409.998	34.6951	26.9974	512.302	0.0935	76.263	78.3212	96.3978	99.43	79.378	0.06294	26.9882
2	64PE449_S03C07	2019-02-04T19:34:23	13.1268	-24.042	8.2794	8.2362	36.3677	414.047	411.002	34.6937	26.9977	513.097	0.0919	77.526	79.6183	96.4399	99.43	78.781	0.06294	26.9885
2	64PE449_S03C07	2019-02-04T19:34:23	13.1268	-24.042	8.2607	8.2172	36.3492	415.055	412.002	34.6924	26.9995	513.919	0.0884	78.29	80.403	96.4281	99.43	79.226	0.06294	26.9899
2	64PE449_S03C07	2019-02-04T19:34:23	13.1268	-24.042	8.146	8.1034	36.2345	416.064	413.003	34.6849	27.0108	514.836	0.0912	78.71	80.8352	96.4141	99.43	79.111	0.06294	26.9998
2	64PE449_S03C07	2019-02-04T19:34:23	13.1268	-24.042	8.1106	8.0677	36.1955	417.072	414.004	34.6781	27.0109	515.902	0.0923	78.866	80.9953	96.4216	99.43	79.187	0.06294	26.9995
2	64PE449_S03C07	2019-02-04T19:34:23	13.1268	-24.042	8.0984	8.0553	36.1823	418.081	414.999	34.675	27.0103	517.12	0.0894	78.921	81.0518	96.445	99.43	79.476	0.06294	26.9994
2	64PE449_S03C07	2019-02-04T19:34:23	13.1268	-24.042	8.0939	8.0508	36.1778	419.089	415.999	34.6733	27.0097	518.309	0.0924	78.913	81.0436	96.4612	99.43	78.707	0.06294	26.9994
2	64PE449_S03C07	2019-02-04T19:34:23	13.1268	-24.042	8.0932	8.0499	36.1777	420.097	416.999	34.6728	27.0094	519.472	0.094	79.078	81.2131	96.4612	99.44	78.889	0.06294	26.9996
2	64PE449_S03C07	2019-02-04T19:34:23	13.1268	-24.042	8.0824	8.0391	36.1678	421.106	417.997	34.6719	27.0103	520.594	0.0969	79.288	81.4288	96.425	99.44	78.977	0.06294	27.0009
2	64PE449_S03C07	2019-02-04T19:34:23	13.1268	-24.042	8.0801	8.0367	36.1658	422.114	418.998	34.6712	27.0101	521.594	0.0953	79.361	81.5038	96.4579	99.44	79.23	0.06294	27.001
2	64PE449_S03C07	2019-02-04T19:34:23	13.1268	-24.042	8.0626	8.0191	36.1494	423.123	419.998	34.6707	27.0123	522.478	0.0968	79.178	81.3161	96.459	99.44	79.393	0.06294	27.0031
2	64PE449_S03C07	2019-02-04T19:34:23	13.1268	-24.042	8.0532	8.0097	36.1394	424.131	421.003	34.6686	27.0122	523.302	0.0954	79.026	81.1599	96.4215	99.44	79.158	0.06294	27.003
2	64PE449_S03C07	2019-02-04T19:34:23	13.1268	-24.042	8.0529	8.0093	36.1397	425.14	422.003	34.6683	27.0119	524.188	0.0908	78.857	80.9864	96.4098	99.44	78.958	0.06294	27.0031
2	64PE449_S03C07	2019-02-04T19:34:23	13.1268	-24.042	8.0537	8.01	36.1411	426.148	423.001	34.6681	27.0117	525.182	0.0852	78.744	80.8703	96.3685	99.44	78.709	0.06294	27.0032
2	64PE449_S03C07	2019-02-04T19:34:23	13.1268	-24.042	8.0559	8.012	36.1439	427.157	423.999	34.6681	27.0114	526.257	0.0765	78.358	80.4739	96.3926	99.44	78.893	0.06294	27.0032
2	64PE449_S03C07	2019-02-04T19:34:23	13.1268	-24.042	8.0555	8.0116	36.1442	428.165	424.997	34.668	27.0114	527.264	0.0808	77.705	79.8033	96.4237	99.44	78.876	0.06294	27.0034
2	64PE449_S03C07	2019-02-04T19:34:23	13.1268	-24.042	8.0579	8.0138	36.1472	429.174	425.997	34.6681	27.0111	528.179	0.0819	77.353	79.4418	96.3073	99.44	78.732	0.06294	27.0033
2	64PE449_S03C07	2019-02-04T19:34:23	13.1268	-24.042	8.0637	8.0195	36.1539	430.182	427.003	34.6687	27.0107	529.059	0.0854	77.276	79.3627	96.4436	99.44	79.167	0.06294	27.0032
2	64PE449_S03C07	2019-02-04T19:34:23	13.1268	-24.042	8.0598	8.0156	36.1521	431.191	428.002	34.67	27.0124	529.991	0.0857	77.212	79.2971	96.4513	99.44	78.915	0.06294	27.0048
2	64PE449_S03C07	2019-02-04T19:34:23	13.1268	-24.042	8.0474	8.003	36.14	432.199	429.002	34.6691	27.0136	531.013	0.089	77.366	79.4553	96.476	99.44	79.105	0.06294	27.0059
2	64PE449_S03C07	2019-02-04T19:34:23	13.1268	-24.042	8.036	7.9916	36.1293	433.208	430.002	34.6686	27.0148	532.163	0.087	77.88	79.9833	96.4723	99.44	79.156	0.06294	27.007
2	64PE449_S03C07	2019-02-04T19:34:23	13.1268	-24.042	8.016	7.9715	36.1095	434.216	431	34.667	27.0166	533.456	0.0866	78.037	80.1447	96.4942	99.44	78.844	0.06294	27.0085
2	64PE449_S03C07	2019-02-04T19:34:23	13.1268	-24.042	7.987	7.9426	36.0804	435.225	431.998	34.6645	27.0189	534.731	0.0898	78.064	80.1725	96.4981	99.44	79.021	0.06294	27.0105
2	64PE449_S03C07	2019-02-04T19:34:23	13.1268	-24.042	7.9829	7.9384	36.0761	436.233	432.998	34.6632	27.0185	535.844	0.0872	78.358	80.4745	96.5049	99.44	79.342	0.06294	27.0103
2	64PE449_S03C07	2019-02-04T19:34:23	13.1268	-24.042	7.9809	7.9362	36.0746	437.242	433.999	34.6629	27.0186	536.846	0.0856	78.536	80.6573	96.461	99.43	79.143	0.06294	27.0105
2	64PE449_S03C07	2019-02-04T19:34:23	13.1268	-24.042	7.9749	7.9302	36.069	438.25	435	34.6623	27.019	537.807	0.085	78.732	80.8586	96.4427	99.44	79.228	0.06294	27.011
2	64PE449_S03C07	2019-02-04T19:34:23	13.1268	-24.042	7.9679	7.9231	36.0626	439.259	436	34.6618	27.0197	538.745	0.0837	79.272	81.4133	96.503	99.44	79.267	0.06294	27.0117
2	64PE449_S03C07	2019-02-04T19:34:23	13.1268	-24.042	7.9613	7.9164	36.0561	440.267	436.999	34.6609	27.02	539.664	0.0898	79.752	81.9063	96.4901	99.44	79.225	0.06294	27.0119
2	64PE449_S03C07	2019-02-04T19:34:23	13.1268	-24.042	7.9235	7.8787	36.0201	441.276	438	34.66	27.0249	540.545	0.0865	79.646	81.7977	96.476	99.44	79	0.06294	27.0162
2	64PE449_S03C07	2019-02-04T19:34:23	13.1268	-24.042	7.8958	7.8508	35.9909	442.285	439	34.6562	27.0261	541.405	0.0936	79.312	81.4548	96.4804	99.44	79.375	0.06294	27.0169
2	64PE449_S03C07	2019-02-04T19:34:23	13.1268	-24.042	7.8698	7.8249	35.9657	443.293	440.003	34.6547	27.0287	542.292	0.0993	79.199	81.3389	96.4837	99.44	79.046	0.06294	27.0194
2	64PE449_S03C07	2019-02-04T19:34:23	13.1268	-24.042	7.8331	7.7882	35.93	444.302	441.004	34.6528	27.0326	543.293	0.0947	79.015	81.1502	96.4637	99.44	79.211	0.06294	27.0228
2	64PE449_S03C07	2019-02-04T19:34:23	13.1268	-24.042	7.8253	7.7803	35.9224	445.31	442.002	34.6515	27.0327	544.525	0.0978	78.822	80.952	96.4622	99.44	78.933	0.06294	27.0233
2	64PE449_S03C07	2019-02-04T19:34:23	13.1268	-24.042	7.818	7.7729	35.9161	446.319	442.995	34.6509	27.0333	545.921	0.091	78.265	80.3801	96.463	99.44	79.465	0.06294	27.0243
2	64PE449_S03C07	2019-02-04T19:34:23	13.1268	-24.042	7.8169	7.7717	35.9156	447.327	443.999	34.6506	27.0333	547.054	0.0857	77.359	79.4496	96.4382	99.44	79.298	0.06294	27.0245
2	64PE449_S03C07	2019-02-04T19:34:23	13.1268	-24.042	7.8158	7.7705	35.9154	448.336	444.999	34.6507	27.0335	548.056	0.0876	77.033	79.1148	96.4541	99.44	79.25	0.06294	27.025
2	64PE449_S03C07	2019-02-04T19:34:23	13.1268	-24.042	7.8149	7.7695	35.9165	449.345	446.002	34.652	27.0347	549.049	0.0932	77.358	79.4487	96.4443	99.44	79.461	0.06294	27.0264
2	64PE449_S03C07	2019-02-04T19:34:23	13.1268	-24.042	7.7906	7.7452	35.8933	450.353	447.002	34.6509	27.0374	550.131	0.0949	77.713	79.8135	96.429	99.44	79.452	0.06294	27.0288
2	64PE449_S03C07	2019-02-04T19:34:23	13.1268	-24.042	7.7704	7.725	35.8726	451.362	447.998	34.6484	27.0384	551.289	0.0965	77.695	79.7951	96.4105	99.44	79.538	0.06294	27.0297
2	64PE449_S03C07	2019-02-04T19:34:23	13.1268	-24.042	7.7634	7.7179	35.8655	452.37	448.998	34.6471	27.0384	552.346	0.0973	77.808	79.9111	96.4051	99.44	79.021	0.06294	27.0299
2	64PE449_S03C07	2019-02-04T19:34:23	13.1268	-24.042	7.759	7.7135	35.8616	453.379	449.996	34.6465	27.0386	553.3	0.098	78.021	80.1299	96.4531	99.44	78.994	0.06294	27.0302
2	64PE449_S03C07	2019-02-04T19:34:23	13.1268	-24.042	7.754	7.7083	35.8567	454.388	451.001	34.6457	27.0387	554.196	0.1003	78.008	80.1166	96.4749	99.44	79.405	0.06294	27.0304
2	64PE449_S03C07	2019-02-04T19:34:23	13.1268	-24.042	7.7514	7.7056	35.8548	455.396	451.998	34.6455	27.039	555.07	0.094	77.688	79.788	96.4632	99.43	79.282	0.06294	27.0307
2	64PE449_S03C07	2019-02-04T19:34:23	13.1268	-24.042	7.7376	7.6918	35.8417	456.405	453.002	34.6448	27.0404	555.928	0.0926	77.484	79.5786	96.5029	99.44	79.187	0.06294	27.0321
2	64PE449_S03C07	2019-02-04T19:34:23	13.1268	-24.042	7.7352	7.6893	35.8395	457.413	454.002	34.6441	27.0403	556.829	0.0981	77.884	79.9894	96.4812	99.44	78.95	0.06294	27.0321
2	64PE449_S03C07	2019-02-04T19:34:23	13.1268	-24.042	7.7334	7.6874	35.8387	458.422	455.002	34.6444	27.0408	557.81	0.0925	78.099	80.2102	96.4925	99.44	78.647	0.06294	27.0327
2	64PE449_S03C07	2019-02-04T19:34:23	13.1268	-24.042	7.7051	7.6591	35.8124	459.431	456.002	34.644	27.0446	558.905	0.0948	78.005	80.114	96.5007	99.44	78.986	0.06294	27.0361
2	64PE449_S03C07	2019-02-04T19:34:23	13.1268	-24.042	7.6809	7.6348	35.7875	460.439	457.001	34.6411	27.0459	560.189	0.0868	78.276	80.3924	96.3715	99.43	79.244	0.06294	27.0372
2	64PE449_S03C07	2019-02-04T19:34:23	13.1268	-24.042	7.6723	7.6261	35.7796	461.448	457.997	34.6404	27.0466	561.468	0.0908	78.432	80.5526	96.4797	99.44	79.112	0.06294	27.038
2	64PE449_S03C07	2019-02-04T19:34:23	13.1268	-24.042	7.6553	7.6091	35.7631	462.457	458.999	34.6392	27.048	562.549	0.0964	78.489	80.6113	96.4836	99.44	79.134	0.06294	27.0394
2	64PE449_S03C07	2019-02-04T19:34:23	13.1268	-24.042	7.6483	7.602	35.7563	463.465	460	34.6381	27.0483	563.577	0.0951	78.39	80.5096	96.4767	99.43	79.134	0.06294	27.0397
2	64PE449_S03C07	2019-02-04T19:34:23	13.1268	-24.042	7.6443	7.598	35.7528	464.474	460.999	34.6376	27.0485	564.614	0.0946	78.302	80.4193	96.467	99.44	79.502	0.06294	27.04
2	64PE449_S03C07	2019-02-04T19:34:23	13.1268	-24.042	7.6405	7.5941	35.7496	465.483	462.001	34.6372	27.0487	565.646	0.0912	78.217	80.332	96.4709	99.44	79.645	0.06294	27.0404
2	64PE449_S03C07	2019-02-04T19:34:23	13.1268	-24.042	7.6384	7.5919	35.7483	466.491	463	34.6371	27.049	566.649	0.0872	78.42	80.5405	96.4439	99.44	79.515	0.06294	27.0409
2	64PE449_S03C07	2019-02-04T19:34:23	13.1268	-24.042	7.6351	7.5884	35.7458	467.5	463.998	34.6373	27.0496	567.616	0.0866	78.548	80.6721	96.4512	99.44	79.215	0.06294	27.0415
2	64PE449_S03C07	2019-02-04T19:34:23	13.1268	-24.042	7.6233	7.5767	35.7344	468.509	465.003	34.6363	27.0505	568.598	0.0917	78.772	80.9022	96.381	99.44	79.288	0.06294	27.0424
2	64PE449_S03C07	2019-02-04T19:34:23	13.1268	-24.042	7.6165	7.5697	35.7274	469.517	466.006	34.635	27.0505	569.776	0.0883	78.833	80.9648	96.4287	99.44	79.432	0.06294	27.0424
2	64PE449_S03C07	2019-02-04T19:34:23	13.1268	-24.042	7.5935	7.5467	35.7041	470.526	467.001	34.6308	27.0505	588.046	0.0884	78.935	81.0697	96.4738	99.44	79.707	0.06294	27.0435
2	64PE449_S03C07	2019-02-04T19:34:23	13.1268	-24.042	7.5691	7.5223	35.6792	471.535	467.999	34.6275	27.0514	608.094	0.0932	79.341	81.4867	96.4907	99.44	79.646	0.06294	27.0445
2	64PE449_S03C07	2019-02-04T19:34:23	13.1268	-24.042	7.5297	7.483	35.6421	472.543	469.001	34.6263	27.0562	628.789	0.09	79.553	81.7048	96.4731	99.44	79.495	0.06294	27.049
2	64PE449_S03C07	2019-02-04T19:34:23	13.1268	-24.042	7.5214	7.4746	35.6343	473.552	470.003	34.6252	27.0565	656.034	0.0921	79.628	81.7819	96.4734	99.44	79.189	0.06294	27.0497
2	64PE449_S03C07	2019-02-04T19:34:23	13.1268	-24.042	7.4978	7.4509	35.6114	474.561	470.999	34.6237	27.0588	665.815	0.087	79.803	81.9618	96.4773	99.44	79.536	0.06294	27.0517
2	64PE449_S03C07	2019-02-04T19:34:23	13.1268	-24.042	7.4821	7.4351	35.5969	475.57	471.997	34.6235	27.0608	668.658	0.0853	80.136	82.304	96.4457	99.44	78.767	0.06294	27.0535
2	64PE449_S03C07	2019-02-04T19:34:23	13.1268	-24.042	7.4412	7.3944	35.5572	476.578	473.002	34.6214	27.0651	670.386	0.0818	80.146	82.3145	96.4648	99.44	79.649	0.06294	27.0571
2	64PE449_S03C07	2019-02-04T19:34:23	13.1268	-24.042	7.4224	7.3755	35.5384	477.587	473.998	34.6192	27.066	673.101	0.082	80.238	82.4091	96.468	99.44	79.149	0.06294	27.0581
2	64PE449_S03C07	2019-02-04T19:34:23	13.1268	-24.042	7.4195	7.3725	35.5362	478.596	475.001	34.6188	27.0661	675.323	0.0894	80.144	82.3126	96.4473	99.44	78.578	0.06294	27.0584
2	64PE449_S03C07	2019-02-04T19:34:23	13.1268	-24.042	7.4134	7.3664	35.5309	479.604	476.002	34.6185	27.0668	677.172	0.0901	79.991	82.1555	96.4352	99.44	79.494	0.06294	27.0592
2	64PE449_S03C07	2019-02-04T19:34:23	13.1268	-24.042	7.4111	7.3639	35.5291	480.613	476.998	34.6182	27.0669	679.537	0.0789	79.996	82.1607	96.4259	99.44	78.777	0.06294	27.0595
2	64PE449_S03C07	2019-02-04T19:34:23	13.1268	-24.042	7.4088	7.3615	35.5274	481.622	477.999	34.618	27.0671	681.302	0.0815	79.892	82.0539	96.4048	99.44	78.553	0.06294	27.0598
2	64PE449_S03C07	2019-02-04T19:34:23	13.1268	-24.042	7.4079	7.3605	35.527	482.631	479	34.6179	27.0671	682.971	0.0841	79.951	82.1145	96.3976	99.44	79.512	0.06294	27.0599
2	64PE449_S03C07	2019-02-04T19:34:23	13.1268	-24.042	7.4081	7.3606	35.5277	483.639	480.002	34.6178	27.067	684.61	0.0803	79.98	82.1443	96.4019	99.44	78.873	0.06294	27.0599
2	64PE449_S03C07	2019-02-04T19:34:23	13.1268	-24.042	7.4085	7.361	35.5286	484.648	480.999	34.6177	27.0669	686.581	0.0935	80.028	82.1935	96.3809	99.44	78.856	0.06294	27.0599
2	64PE449_S03C07	2019-02-04T19:34:23	13.1268	-24.042	7.4087	7.361	35.5292	485.657	481.999	34.6178	27.0669	688.355	0.0872	79.998	82.1627	96.3565	99.44	79.162	0.06294	27.0599
2	64PE449_S03C07	2019-02-04T19:34:23	13.1268	-24.042	7.408	7.3602	35.5291	486.666	483	34.6178	27.0671	689.827	0.0793	80.07	82.2367	96.3642	99.44	78.689	0.06294	27.0601
2	64PE449_S03C07	2019-02-04T19:34:23	13.1268	-24.042	7.4016	7.3538	35.5235	487.675	484.002	34.6176	27.0679	691.326	0.08	80.085	82.2522	96.4028	99.44	79.119	0.06294	27.0607
2	64PE449_S03C07	2019-02-04T19:34:23	13.1268	-24.042	7.3919	7.344	35.5142	488.683	485	34.6169	27.0687	693.034	0.0809	80.235	82.4063	96.3824	99.44	79.206	0.06294	27.0615
2	64PE449_S03C07	2019-02-04T19:34:23	13.1268	-24.042	7.3846	7.3367	35.5074	489.692	486	34.6165	27.0694	694.889	0.0844	80.22	82.3909	96.3932	99.44	78.521	0.06294	27.062
2	64PE449_S03C07	2019-02-04T19:34:23	13.1268	-24.042	7.3774	7.3293	35.5006	490.701	487.002	34.6158	27.0699	696.941	0.0845	80.317	82.4906	96.3599	99.44	79.328	0.06294	27.0626
2	64PE449_S03C07	2019-02-04T19:34:23	13.1268	-24.042	7.3733	7.3252	35.497	491.71	487.998	34.6154	27.0701	699.246	0.077	80.328	82.5019	96.3769	99.44	78.516	0.06294	27.0629
2	64PE449_S03C07	2019-02-04T19:34:23	13.1268	-24.042	7.3704	7.3222	35.4947	492.718	488.998	34.6152	27.0704	701.034	0.0821	80.513	82.6919	96.3745	99.44	79.245	0.06294	27.0632
2	64PE449_S03C07	2019-02-04T19:34:23	13.1268	-24.042	7.3499	7.3017	35.4753	493.727	490	34.6145	27.0728	702.399	0.0851	80.876	83.0649	96.3408	99.44	78.898	0.06294	27.0652
2	64PE449_S03C07	2019-02-04T19:34:23	13.1268	-24.042	7.3248	7.2766	35.45	494.736	491	34.6121	27.0745	703.788	0.0835	80.969	83.1605	96.3286	99.44	78.882	0.06294	27.0665
2	64PE449_S03C07	2019-02-04T19:34:23	13.1268	-24.042	7.3137	7.2654	35.4391	495.745	492.002	34.6108	27.075	705.216	0.0912	81.141	83.3372	96.3626	99.44	79.669	0.06294	27.067
2	64PE449_S03C07	2019-02-04T19:34:23	13.1268	-24.042	7.3065	7.2581	35.4321	496.754	493.001	34.6097	27.0752	707.134	0.0917	81.42	83.6238	96.3732	99.44	78.726	0.06294	27.0673
2	64PE449_S03C07	2019-02-04T19:34:23	13.1268	-24.042	7.2951	7.2466	35.4213	497.763	494.001	34.6087	27.076	709.464	0.087	81.879	84.0953	96.3685	99.44	79.018	0.06294	27.0682
2	64PE449_S03C07	2019-02-04T19:34:23	13.1268	-24.042	7.2695	7.221	35.396	498.771	494.997	34.6066	27.078	711.883	0.0894	82.474	84.7066	96.4176	99.44	79.437	0.06294	27.0699
2	64PE449_S03C07	2019-02-04T19:34:23	13.1268	-24.042	7.2547	7.2061	35.3815	499.78	495.999	34.6051	27.0789	713.627	0.0821	83.048	85.2962	96.4315	99.44	78.486	0.06294	27.0708
2	64PE449_S03C07	2019-02-04T19:34:23	13.1268	-24.042	7.2325	7.184	35.3605	500.789	496.999	34.6041	27.0813	715.147	0.0769	83.525	85.7863	96.4266	99.44	79.441	0.06294	27.0729
2	64PE449_S03C07	2019-02-04T19:34:23	13.1268	-24.042	7.2041	7.1556	35.332	501.798	498	34.6014	27.0831	716.543	0.0841	83.77	86.038	96.4256	99.44	79.714	0.06294	27.0744
2	64PE449_S03C07	2019-02-04T19:34:23	13.1268	-24.042	7.1914	7.1428	35.3194	502.807	499.002	34.5997	27.0836	717.935	0.0896	83.893	86.1644	96.4259	99.44	78.826	0.06294	27.075
2	64PE449_S03C07	2019-02-04T19:34:23	13.1268	-24.042	7.1846	7.136	35.3131	503.816	500	34.5988	27.0838	719.662	0.0809	84.373	86.6574	96.4308	99.44	78.455	0.06294	27.0754
2	64PE449_S03C07	2019-02-04T19:34:23	13.1268	-24.042	7.1658	7.1171	35.2949	504.824	501.001	34.5974	27.0853	721.375	0.0852	85.103	87.4073	96.4298	99.44	79.477	0.06294	27.0769
2	64PE449_S03C07	2019-02-04T19:34:23	13.1268	-24.042	7.1298	7.0812	35.2591	505.833	502.001	34.5942	27.0878	723.342	0.0861	86.157	88.4901	96.4264	99.44	79.044	0.06294	27.0791
2	64PE449_S03C07	2019-02-04T19:34:23	13.1268	-24.042	7.0745	7.026	35.2055	506.842	502.996	34.5911	27.0931	725.459	0.0829	87.296	89.6603	96.4227	99.44	78.697	0.06294	27.0837
2	64PE449_S03C07	2019-02-04T19:34:23	13.1268	-24.042	7.0137	6.9653	35.145	507.851	504.002	34.5862	27.0976	726.981	0.0867	87.085	89.4439	96.4661	99.44	79.326	0.06294	27.0875
[truncated: 11,510 more rows]
