# Supplementary material for: Bacteriohopanetetrol-x: constraining its application as a lipid biomarker for marine anammox using the water column oxygen gradient of the Benguela upwelling system
Source: Copernicus journal article supplement (doi:10.5194/bg-2021-257), 2021-10-05
Supplement: Supplementary file 2 [file Table_S2.xlsx]

## Sheet: ODV_Water Column Nutrient data 
cruise	Station ID manuscript	Longitude	Latitude	Depth	PO4 (µmol/L)	NH4 (µmol/L)	NO2 (µmol/L)	NO3 (µmol/L)	N deficit
64PE449	3	14.128	-23.096	10	0.589	0.478	0.111	6.76	2.0765
64PE449	3	14.128	-23.096	20	1.32	0.228	0.088	18.753	2.044
64PE449	3	14.128	-23.096	30	1.415	0.114	0.028	19.977	2.5215
64PE449	3	14.128	-23.096	40	1.343	0.095	0.017	19.093	2.2755
64PE449	3	14.128	-23.096	50	1.402	0.101	0.019	20.397	1.9165
64PE449	3	14.128	-23.096	60	1.604	0.102	0.022	23.813	1.727
64PE449	3	14.128	-23.096	75	1.806	0.091	0.016	27.629	1.152
64PE449	3	14.128	-23.096	90	1.97	0.114	0.015	28.68	2.703
64PE449	3	14.128	-23.096	100	1.919	0.117	0.025	28.121	2.442
64PE449	3	14.128	-23.096	107.5	1.814	0.105	0.18	27.075	1.6645
64PE449	3	14.128	-23.096	115	1.828	0.222	0.423	26.533	2.0635
64PE449	3	14.128	-23.096	120	1.828	0.222	0.423	26.533	2.0635
64PE449	2	13.127	-24.042	10	0.479	0.171	0.212	6.868	0.413
64PE449	2	13.127	-24.042	50	1.078	0.342	0.374	14.856	1.676
64PE449	2	13.127	-24.042	100	1.568	0.102	0.029	23.401	1.556
64PE449	2	13.127	-24.042	125	1.684	0.113	0.022	25.238	1.571
64PE449	2	13.127	-24.042	200	1.916	0.096	0.017	28.963	1.58
64PE449	2	13.127	-24.042	250	2.083	0.099	0.013	31.157	2.059
64PE449	2	13.127	-24.042	300	2.172	0.086	0.02	32.31	2.336
64PE449	2	13.127	-24.042	310	2.131	0.085	0.031	31.829	2.151
64PE449	2	13.127	-24.042	350	2.126	0.087	0.027	31.993	1.909
64PE449	2	13.127	-24.042	400	2.31	0.089	0.014	34.886	1.971
64PE449	2	13.127	-24.042	450	2.399	0.075	0.011	36.349	1.949
64PE449	2	13.127	-24.042	500	2.44	0.077	0.01	36.92	2.033
64PE449	2	13.127	-24.042	550	2.505	0.082	0.01	37.77	2.218
64PE449	2	13.127	-24.042	600	2.541	0.091	0.01	37.88	2.675
64PE449	2	13.127	-24.042	670	2.55	0.078	0.013	37.757	2.952
64PE449	2	13.127	-24.042	700	2.559	0.108	0.016	37.744	3.076
64PE449	2	13.127	-24.042	715	2.558	0.091	0.017	37.683	3.137
64PE449	4	14.244	-23.011	10	1.18572	0.307	0.244	15.304	3.11652
64PE449	4	14.244	-23.011	20	1.60786	0.342	0.151	23.2282	2.0045
64PE449	4	14.244	-23.011	30	2.09789	0.22	0.207	30.681	2.45821
64PE449	4	14.244	-23.011	35	2.06738	0.182	0.118	30.4476	2.33054
64PE449	4	14.244	-23.011	40	2.10182	0.125	0.041	30.951	2.51218
64PE449	4	14.244	-23.011	45	2.0605	0.259	0.104	30.2952	2.30974
64PE449	4	14.244	-23.011	50	2.10478	0.243	0.136	30.3568	2.94062
64PE449	4	14.244	-23.011	55	2.091	0.376	0.22	28.796	4.064
64PE449	4	14.244	-23.011	60	2.10182	0.405	0.222	28.8148	4.18738
64PE449	4	14.244	-23.011	65	2.10379	0.377	0.227	28.7578	4.29887
64PE449	4	14.244	-23.011	70	2.10182	0.382	0.223	28.8658	4.15838
64PE449	4	14.244	-23.011	75	2.10182	0.387	0.224	28.8856	4.13258
64PE449	4	14.244	-23.011	80	2.10674	0.412	0.222	29.0124	4.0615
64PE449	4	14.244	-23.011	90	2.09297	0.401	0.223	29.9474	2.91609
64PE449	4	14.244	-23.011	95	2.09789	0.436	0.223	29.8642	3.04301
64PE449	4	14.244	-23.011	97	2.091	0.453	0.225	30.1014	2.6766
64PE449	6	14.596	-25.072	10	1.412	1.434	0.224	4.526	16.408
64PE449	6	14.596	-25.072	20	1.564	2.107	0.276	5.904	16.737
64PE449	6	14.596	-25.072	25	1.731	3.23	0.349	9.641	14.476
64PE449	6	14.596	-25.072	30	1.939	3.742	0.447	17.693	9.142
64PE449	6	14.596	-25.072	35	2.011	3.551	0.494	22.256	5.875
64PE449	6	14.596	-25.072	40	1.976	2.24	0.654	23.796	4.926
64PE449	6	14.596	-25.072	50	1.936	1.474	0.676	24.374	4.452
64PE449	6	14.596	-25.072	60	2.041	2.343	3.527	16.433	10.353
64PE449	6	14.596	-25.072	70	2.187	3.763	4.336	11.504	15.389
64PE449	6	14.596	-25.072	75	2.313	4.511	4.006	9.254	19.237
64PE449	6	14.596	-25.072	85	3.066	7.682	1.553	2.277	37.544
64PE449	6	14.596	-25.072	92	3.423	8.995	0.015	0.035	45.723
64PE449	6	14.596	-25.072	95	3.684	9.781	0.007	0.023	49.133
64PE449	8	13.3	-23.938	10	0.298	0.291	0.092	1.728	2.657
64PE449	8	13.3	-23.938	20	0.397	0.598	0.103	2.447	3.204
64PE449	8	13.3	-23.938	40	0.954	1.457	0.414	10.996	2.397
64PE449	8	13.3	-23.938	60	1.092	0.646	0.447	14.173	2.206
64PE449	8	13.3	-23.938	80	1.274	0.145	0.068	17.872	2.299
64PE449	8	13.3	-23.938	100	1.46	0.088	0.03	21.13	2.112
64PE449	8	13.3	-23.938	124	1.819	0.096	0.014	27.176	1.818
64PE449	8	13.3	-23.938	150	1.883	0.106	0.014	28.156	1.852
64PE449	8	13.3	-23.938	175	1.967	0.083	0.01	29.37	2.009
64PE449	8	13.3	-23.938	225	2.158	0.083	0.009	31.711	2.725
64PE449	8	13.3	-23.938	250	2.185	0.08	0.011	32.189	2.68
64PE449	8	13.3	-23.938	290	2.34	0.066	0.012	32.808	4.554
64PE449	8	13.3	-23.938	300	2.339	0.076	0.013	32.907	4.428
64PE449	8	13.3	-23.938	317	2.34	0.075	0.01	33.24	4.115
64PE449	10	13.793	-21.968	10	0.235	0.184	0.033	1.267	2.276
64PE449	10	13.793	-21.968	14	0.915	1.192	0.222	11.548	1.678
64PE449	10	13.793	-21.968	20	1.538	1.673	0.398	20.422	2.115
64PE449	10	13.793	-21.968	30	1.791	0.107	0.125	27.285	1.139
64PE449	10	13.793	-21.968	40	1.88	0.116	0.052	28.728	1.184
64PE449	10	13.793	-21.968	50	2.036	0.082	0.052	30.458	1.984
64PE449	10	13.793	-21.968	55	1.821	0.227	0.105	25.045	3.759
64PE449	10	13.793	-21.968	60	1.917	0.272	0.107	25.323	4.97
64PE449	10	13.793	-21.968	65	2.482	0.092	0.147	30.493	8.98
64PE449	10	13.793	-21.968	70	2.806	0.818	0.074	28.636	15.368
64PE449	10	13.793	-21.968	74	2.839	0.975	0.08	28.87	15.499
64PE449	10	13.793	-21.968	78	2.562	0.743	0.092	27.578	12.579
64PE449	10	13.793	-21.968	82	2.726	0.798	0.085	28.115	14.618
64PE449	10	13.793	-21.968	88	2.854	0.983	0.087	28.753	15.841
64PE449	10	13.793	-21.968	93	2.842	0.952	0.088	28.722	15.71
64PE450	18	11.635	-17.4083	10	1.095	0.276	0.474	15.686	1.084
64PE450	18	11.635	-17.4083	20	1.238	0.241	0.468	17.832	1.267
64PE450	18	11.635	-17.4083	35	1.542	0.428	0.392	21.318	2.534
64PE450	18	11.635	-17.4083	45	1.649	0.283	0.293	23.287	2.521
64PE450	18	11.635	-17.4083	55	1.629	0.166	0.288	24.362	1.248
64PE450	18	11.635	-17.4083	60	1.616	0.128	0.241	24.199	1.288
64PE450	18	11.635	-17.4083	70	1.792	0.736	0.334	25.496	2.106
64PE450	18	11.635	-17.4083	75	1.871	1.273	0.423	25.477	2.763
64PE450	18	11.635	-17.4083	80	1.719	0.998	0.443	22.577	3.486
64PE450	18	11.635	-17.4083	85	1.872	1.526	0.46	25.29	2.676
64PE450	18	11.635	-17.4083	90	1.851	1.234	0.413	25.227	2.742
64PE450	139	14.5961	-25.0875	93	2.003	0.689	0.269	9.871	21.219
64PE450	139	14.5961	-25.0875	85	2.073	0.697	0.245	11.505	20.721
64PE450	139	14.5961	-25.0875	80	2.323	0.363	0.288	19.082	17.435
64PE450	139	14.5961	-25.0875	75	2.516	0.559	0.283	20.227	19.187
64PE450	139	14.5961	-25.0875	70	2.442	0.608	0.314	20.766	17.384
64PE450	139	14.5961	-25.0875	65	2.466	0.602	0.316	21.194	17.344
64PE450	139	14.5961	-25.0875	60	2.444	1.048	0.339	22.011	15.706
64PE450	139	14.5961	-25.0875	55	2.529	1.257	0.457	22.463	16.287
64PE450	139	14.5961	-25.0875	50	2.592	1.182	0.449	22.911	16.93
64PE450	139	14.5961	-25.0875	40	2.525	1.074	0.434	22.486	16.406
64PE450	139	14.5961	-25.0875	35	2.609	1.087	0.425	22.355	17.877
64PE450	139	14.5961	-25.0875	20	2.695	1.173	0.463	21.647	19.837
64PE450	139	14.5961	-25.0875	10	2.732	1.038	0.965	18.455	23.254
64PE450	118	12.8134	-19.9963	10	0.811	0.757	0.286	27.5316	0
64PE450	118	12.8134	-19.9963	30	1.575	0.157	0.285	28.321	0
64PE450	118	12.8134	-19.9963	40	1.725	0.118	0.078	29.1103	0
64PE450	118	12.8134	-19.9963	45	1.813	0.133	0.125	29.8997	0
64PE450	118	12.8134	-19.9963	50	1.91	0.245	0.27	30.689	0
64PE450	118	12.8134	-19.9963	54	2.044	0.818	0.754	31.4783	0
64PE450	118	12.8134	-19.9963	65	2.403	3.672	4.65	32.2677	0
64PE450	118	12.8134	-19.9963	68	2.424	3.917	4.911	33.057	0
64PE450	118	12.8134	-19.9963	85	2.333	3.211	4.335	33.8464	0
64PE450	118	12.8134	-19.9963	95	2.297	2.981	4.341	34.6357	0
64PE449	9	13.226	-23.962	10	0.33	0.47	0.101	2.189	2.52
64PE449	9	13.226	-23.962	30	1.006	0.655	0.641	12.969	1.831
64PE449	9	13.226	-23.962	50	1.129	0.119	0.255	15.915	1.775
64PE449	9	13.226	-23.962	100	1.481	0.099	0.025	21.955	1.617
64PE449	9	13.226	-23.962	125	1.707	0.103	0.013	25.747	1.449
64PE449	9	13.226	-23.962	150	1.808	0.088	0.011	27.439	1.39
64PE449	9	13.226	-23.962	175	1.856	0.082	0.01	28.26	1.344
64PE449	9	13.226	-23.962	200	2.051	0.078	0.009	30.771	1.958
64PE449	9	13.226	-23.962	225	2.185	0.075	0.009	32.481	2.395
64PE449	9	13.226	-23.962	250	2.246	0.071	0.006	33.054	2.805
64PE449	9	13.226	-23.962	300	2.34	0.077	0.004	34.416	2.943
64PE449	9	13.226	-23.962	350	2.383	0.074	0.007	35.113	2.934
64PE449	9	13.226	-23.962	390	2.402	0.103	0.023	35.757	2.549
64PE449	9	13.226	-23.962	400	2.399	0.08	0.02	36.12	2.164
64PE449	5	14.196	-24.005	10	0.834	0.881	0.132	5.368	6.963
64PE449	5	14.196	-24.005	15	1.327	2.006	0.295	11.705	7.226
64PE449	5	14.196	-24.005	20	1.357	2.496	0.278	13.372	5.566
64PE449	5	14.196	-24.005	30	1.555	0.634	0.448	22.002	1.796
64PE449	5	14.196	-24.005	40	1.78	0.199	0.164	25.916	2.201
64PE449	5	14.196	-24.005	50	2.442	0.395	0.12	24.13	14.427
64PE449	5	14.196	-24.005	55	1.825	0.269	0.156	25.914	2.861
64PE449	5	14.196	-24.005	60	2.576	0.131	0.157	23.063	17.865
64PE449	5	14.196	-24.005	70	2.535	0.201	0.155	22.405	17.799
64PE449	5	14.196	-24.005	80	2.567	0.313	0.173	22.167	18.419
64PE449	5	14.196	-24.005	90	2.574	0.231	0.172	22.348	18.433
64PE449	5	14.196	-24.005	95	2.613	0.178	0.172	22.428	19.03
64PE449	7	13.389	-25.075	10	0.459	0.829	0.241	5.129	1.145
64PE449	7	13.389	-25.075	100	1.514	0.131	0.037	22.843	1.213
64PE449	7	13.389	-25.075	150	1.702	0.13	0.018	25.102	1.982
64PE449	7	13.389	-25.075	200	1.783	0.122	0.017	26.603	1.786
64PE449	7	13.389	-25.075	250	2.081	0.141	0.008	30.962	2.185
64PE449	7	13.389	-25.075	300	2.394	0.102	0.004	33.396	4.802
64PE449	7	13.389	-25.075	350	2.369	0.109	0.007	34.643	3.145
64PE449	7	13.389	-25.075	400	2.415	0.104	0.001	35.979	2.556
64PE449	7	13.389	-25.075	500	2.477	0.107	0.002	37.108	2.415
64PE449	7	13.389	-25.075	600	2.51	0.103	0.002	37.298	2.757
64PE449	7	13.389	-25.075	700	2.512	0.118	0	37.32	2.754
64PE449	7	13.389	-25.075	800	2.49	0.11	0	36.26	3.47
64PE449	7	13.389	-25.075	900	2.448	0.09	0.002	35.428	3.648
64PE449	7	13.389	-25.075	990	2.431	0.107	0.02	34.9	3.869
64PE449	7	13.389	-25.075	1000	2.421	0.132	0.025	34.805	3.774
64PE449	7	13.389	-25.075	1012	2.438	0.122	0.025	34.805	4.056
64PE449	1	12.843	-24.056	50	1.154	0.12	0.112	16.658	1.574
64PE449	1	12.843	-24.056	100	1.592	0.105	0.023	23.547	1.797
64PE449	1	12.843	-24.056	150	1.734	0.083	0.016	25.854	1.791
64PE449	1	12.843	-24.056	200	1.962	0.09	0.008	29.472	1.822
64PE449	1	12.843	-24.056	250	2.079	0.086	0.011	31.009	2.158
64PE449	1	12.843	-24.056	270	2.081	0.065	0.013	30.967	2.251
64PE449	1	12.843	-24.056	300	2.022	0.071	0.021	30.519	1.741
64PE449	1	12.843	-24.056	350	2.321	0.069	0.005	34.755	2.307
64PE449	1	12.843	-24.056	400	2.371	0.062	0.004	35.446	2.424
64PE449	1	12.843	-24.056	448	2.372	0.072	0.004	35.816	2.06
64PE449	1	12.843	-24.056	500	2.426	0.082	0.002	36.338	2.394
64PE449	1	12.843	-24.056	549	2.505	0.084	0.002	37.658	2.336
64PE449	1	12.843	-24.056	600	2.543	0.083	0.002	38.108	2.495
64PE449	1	12.843	-24.056	649	2.56	0.073	0.001	38.189	2.697
64PE449	1	12.843	-24.056	700	2.523	0.069	0.001	37.459	2.839
64PE449	1	12.843	-24.056	800	2.527	0.083	0.001	37.169	3.179
64PE449	1	12.843	-24.056	900	2.451	0.077	0.001	35.769	3.369
64PE449	1	12.843	-24.056	901	2.456	0.067	0	35.82	3.409
64PE449	1	12.843	-24.056	1000	2.366	0.082	0	34.39	3.384
64PE449	1	12.843	-24.056	1100	2.301	0.091	0	33.38	3.345
64PE449	1	12.843	-24.056	1201	2.191	0.076	0.001	31.679	3.3
64PE449	1	12.843	-24.056	1301	2.061	0.094	0.002	29.928	2.952
64PE449	1	12.843	-24.056	1401	1.967	0.104	0	28.52	2.848
64PE449	1	12.843	-24.056	1505	1.869	0.098	0.005	26.925	2.876
64PE450	4	10.3482	-20.2835	10	0.196	0.344	0.039	0.421	2.332
64PE450	4	10.3482	-20.2835	46	0.372	1.013	0.234	1.466	3.239
64PE450	4	10.3482	-20.2835	500	2.438	0.098	0.003	37.407	1.5
64PE450	4	10.3482	-20.2835	1246	2.107	0.104	0.001	30.739	2.868
64PE450	4	10.3482	-20.2835	1346	1.988	0.089	0.012	28.888	2.819
64PE450	27	11.6353	-17.4079	10	0.851	0.261	0.386	11.034	1.935
64PE450	27	11.6353	-17.4079	35	0.969	0.246	0.364	12.636	2.258
64PE450	27	11.6353	-17.4079	45	0.888	0.198	0.367	13.113	0.53
64PE450	27	11.6353	-17.4079	50	0.918	0.261	0.401	13.709	0.317
64PE450	27	11.6353	-17.4079	55	1.466	0.27	0.456	20.704	2.026
64PE450	27	11.6353	-17.4079	70	1.68	0.135	0.258	24.422	2.065
64PE450	27	11.6353	-17.4079	70	1.662	0.211	0.276	24.254	1.851
64PE450	27	11.6353	-17.4079	90	1.822	0.961	0.33	24.81	3.051
64PE450	27	11.6353	-17.4079	95	1.782	0.909	0.303	24.667	2.633
64PE450	31	11.4057	-17.3672	10	0.323	0.227	0.175	2.235	2.531
64PE450	31	11.4057	-17.3672	16	0.346	0.252	0.209	2.691	2.384
64PE450	31	11.4057	-17.3672	90	1.716	0.14	0.09	26.74	0.486
64PE450	31	11.4057	-17.3672	201	1.9	0.125	0.04	30.19	0.045
64PE450	31	11.4057	-17.3672	246	2.07	0.11	0.402	31.008	1.6
64PE450	39	11.2851	-17.4046	10	0.292	0.168	0.216	1.784	2.504
64PE450	39	11.2851	-17.4046	16	0.299	0.145	0.211	1.859	2.569
64PE450	39	11.2851	-17.4046	239	1.924	0.124	0.06	30.81	-0.21
64PE450	39	11.2851	-17.4046	438	2.526	0.125	0.056	38.964	1.271
64PE450	39	11.2851	-17.4046	478	2.606	0.14	0.082	39.848	1.626
64PE450	10	10.9171	-18.8593	10	0.151	0.082	0.002	0.018	2.314
64PE450	10	10.9171	-18.8593	28	0.152	0.099	0.003	0.017	2.313
64PE450	10	10.9171	-18.8593	285	2.136	0.077	0.008	33.572	0.519
64PE450	10	10.9171	-18.8593	1169	2.171	0.083	0.001	31.679	2.973
64PE450	10	10.9171	-18.8593	1271	2.102	0.106	0.006	30.624	2.896
64PE450	10	10.9171	-18.8593	1282	2.056	0.082	0.009	30.041	2.764
64PE450	44	11.4731	-17.4044	10	0.177	0.11	0.029	0.101	2.592
64PE450	44	11.4731	-17.4044	40	0.706	0.281	0.312	9.698	1.005
64PE450	44	11.4731	-17.4044	129	1.722	0.095	0.06	27.03	0.367
64PE450	44	11.4731	-17.4044	171	1.834	0.16	0.176	27.464	1.544
64PE450	51	11.2069	-17.3937	10	0.221	0.261	0.026	0.714	2.535
64PE450	51	11.2069	-17.3937	10	0.159	0.111	0.001	0	2.432
64PE450	51	11.2069	-17.3937	309	0.345	0.291	0.058	2.822	2.349
64PE450	51	11.2069	-17.3937	705	2.178	0.093	0.024	34.516	0.215
64PE450	51	11.2069	-17.3937	705	2.6	0.127	0.017	38.423	3.033
64PE450	51	11.2069	-17.3937	740	2.601	0.127	0.04	38.54	2.909
64PE450	51	11.2069	-17.3937	740	2.58	0.104	0.032	38.378	2.766
64PE450	51	11.2069	-17.3937	740	2.605	0.089	0.02	38.31	3.261
64PE450	55	11.1426	-17.3756	10	0.124	0.106	0	0.0103094	1.86769
64PE450	55	11.1426	-17.3756	100	1.569	0.107	0.275	22.7831	1.93887
64PE450	55	11.1426	-17.3756	120	1.77	0.093	0.067	27.3526	0.807408
64PE450	55	11.1426	-17.3756	250	2.008	0.075	0.029	31.6241	0.399934
64PE450	55	11.1426	-17.3756	250	2	0.073	0.023	31.699	0.205017
64PE450	55	11.1426	-17.3756	250	2.018	0.088	0.018	32.0486	0.133432
64PE450	55	11.1426	-17.3756	320	2.18	0.122	0.017	34.629	0.111966
64PE450	55	11.1426	-17.3756	350	2.213	0.091	0.017	34.9933	0.306691
64PE450	55	11.1426	-17.3756	500	2.553	0.097	0.074	39.8786	0.798356
64PE450	55	11.1426	-17.3756	900	2.483	0.072	0.058	36.1042	3.49379
64PE450	55	11.1426	-17.3756	1000	2.376	0.086	0.069	34.6164	3.24459
64PE450	102	11.3196	-17.42	10	0.221	0.405	0.042	0.128	2.961
64PE450	102	11.3196	-17.42	20	0.341	0.835	0.054	1.236	3.331
64PE450	102	11.3196	-17.42	152	1.799	0.087	0.151	27.929	0.617
64PE450	102	11.3196	-17.42	198	1.894	0.062	0.073	29.107	1.062
64PE450	102	11.3196	-17.42	242	1.978	0.088	0.176	29.604	1.78
64PE450	102	11.3196	-17.42	242	1.952	0.088	0.167	29.553	1.424
64PE450	102	11.3196	-17.42	242	1.967	0.117	0.165	29.515	1.675
64PE450	102	11.3196	-17.42	242	1.965	0.088	0.14	29.6	1.612
64PE450	130	13.2993	-20.999	10	0.431	0.678	0.14	3.87	2.208
64PE450	130	13.2993	-20.999	20	0.9	1.223	0.298	9.782	3.097
64PE450	130	13.2993	-20.999	25	1.097	1.192	0.354	12.516	3.49
64PE450	130	13.2993	-20.999	30	1.179	1.119	0.392	14.448	2.905
64PE450	130	13.2993	-20.999	35	1.498	0.425	0.3	20.96	2.283
64PE450	130	13.2993	-20.999	40	1.78	0.15	0.115	26.315	1.9
64PE450	130	13.2993	-20.999	45	1.868	0.092	0.057	28.453	1.286
64PE450	130	13.2993	-20.999	50	1.755	0.09	0.094	26.236	1.66
64PE450	130	13.2993	-20.999	55	1.327	0.78	0.46	17.28	2.712
64PE450	130	13.2993	-20.999	60	1.727	0.098	0.17	25.68	1.684
64PE450	130	13.2993	-20.999	65	2.025	0.078	0.052	29.978	2.292
64PE450	130	13.2993	-20.999	70	2.429	2.222	3.418	18.912	14.312
64PE450	130	13.2993	-20.999	75	2.467	1.546	2.56	21.36	14.006
64PE450	130	13.2993	-20.999	80	2.574	1.538	2.046	23.374	14.226
64PE450	130	13.2993	-20.999	85	2.631	0.734	1.256	24.434	15.672
64PE450	130	13.2993	-20.999	92	2.644	0.568	1.189	24.461	16.086
64PE450	120	12.2203	-20.9994	9	0.31	0.228	0.119	1.841	2.772
64PE450	120	12.2203	-20.9994	50	0.973	0.123	0.074	12.786	2.585
64PE450	120	12.2203	-20.9994	100	1.564	0.117	0.039	23.451	1.417
64PE450	120	12.2203	-20.9994	150	1.681	0.111	0.012	25.468	1.305
64PE450	120	12.2203	-20.9994	200	1.566	0.322	0.009	23.661	1.064
64PE450	120	12.2203	-20.9994	237	1.657	0.101	0.005	25.265	1.141
64PE450	120	12.2203	-20.9994	250	2.032	0.088	0.051	31.039	1.334
64PE450	120	12.2203	-20.9994	276	2.083	0.084	0.008	32.032	1.204
64PE450	120	12.2203	-20.9994	300	2.278	0.097	0.012	34.778	1.561
64PE450	120	12.2203	-20.9994	319	2.305	0.082	0.09	35.13	1.578
64PE450	120	12.2203	-20.9994	400	2.407	0.068	0.09	37.08	1.274
64PE450	120	12.2203	-20.9994	499	2.486	0.086	0.021	37.979	1.69
64PE450	120	12.2203	-20.9994	600	2.565	0.081	0.036	38.204	2.719
64PE450	120	12.2203	-20.9994	648	2.613	0.078	0.002	38.868	2.86
64PE450	120	12.2203	-20.9994	700	2.593	0.082	0.038	37.962	3.406
64PE450	120	12.2203	-20.9994	735	2.52	0.07	0.045	37.095	3.11
64PE450	140	14.1255	-23.1137	10	1.422	0.235	0.159	18.701	3.657
64PE450	140	14.1255	-23.1137	20	1.465	0.214	0.158	19.252	3.816
64PE450	140	14.1255	-23.1137	40	1.874	0.104	0.042	27.858	1.98
64PE450	140	14.1255	-23.1137	50	1.934	0.121	0.045	28.845	1.933
64PE450	140	14.1255	-23.1137	60	2.129	0.098	0.08	30.3	3.586
64PE450	140	14.1255	-23.1137	70	2.433	0.089	0.107	28.383	10.349
64PE450	140	14.1255	-23.1137	80	2.451	0.088	0.121	26.999	12.008
64PE450	140	14.1255	-23.1137	90	2.441	0.086	0.153	26.847	11.97
64PE450	140	14.1255	-23.1137	100	2.455	0.094	0.167	26.973	12.046
64PE450	140	14.1255	-23.1137	108	2.418	0.126	0.193	26.967	11.402
64PE450	140	14.1255	-23.1137	115	2.4	0.199	0.225	27.135	10.841
64PE450	140	14.1255	-23.1137	120	2.35	0.258	0.238	27.072	10.032
64PE450	144	13.1257	-24.0419	10	0.06	0.175	0.077	1.143	-0.435
64PE450	144	13.1257	-24.0419	50	1.257	0.181	0.307	16.733	2.891
64PE450	144	13.1257	-24.0419	100	1.654	0.119	0.035	24.565	1.745
64PE450	144	13.1257	-24.0419	125	1.727	0.134	0.024	25.916	1.558
64PE450	144	13.1257	-24.0419	150	1.872	0.118	0.018	28.432	1.384
64PE450	144	13.1257	-24.0419	175	1.906	0.116	0.016	29.104	1.26
64PE450	144	13.1257	-24.0419	200	1.995	0.108	0.014	29.906	1.892
64PE450	144	13.1257	-24.0419	250	2.112	0.123	0.011	31.919	1.739
64PE450	144	13.1257	-24.0419	300	2.243	0.098	0.006	33.264	2.52
64PE450	144	13.1257	-24.0419	310	2.276	0.086	0.011	33.629	2.69
64PE450	144	13.1257	-24.0419	350	2.286	0.095	0.013	34.187	2.281
64PE450	144	13.1257	-24.0419	400	2.353	0.074	0.038	34.922	2.614
64PE450	144	13.1257	-24.0419	450	2.394	0.109	0.011	35.769	2.415
64PE450	144	13.1257	-24.0419	500	2.391	0.092	0.009	36.201	1.954
64PE450	144	13.1257	-24.0419	549	2.477	0.071	0.077	36.853	2.631
64PE450	144	13.1257	-24.0419	600	2.503	0.078	0.022	37.378	2.57
64PE450	144	13.1257	-24.0419	670	2.552	0.08	0.007	37.573	3.172
64PE450	144	13.1257	-24.0419	700	2.532	0.085	0.023	37.277	3.127
64PE450	144	13.1257	-24.0419	715	2.556	0.075	0.012	37.388	3.421
64PE450	144	13.1257	-24.0419	730	2.523	0.071	0.032	36.888	3.377
