# Supplementary material for: Bacteriohopanetetrol-x: constraining its application as a lipid biomarker for marine anammox using the water column oxygen gradient of the Benguela upwelling system
Source: Copernicus journal article supplement (doi:10.5194/bg-2021-257), 2021-10-05
Supplement: Supplementary file 3 [file Table_S3.xlsx]

## Sheet: Sheet1
Table S1. Overview of stations, water column depths sampled for SPM, relative abundances of the PC ladderane (ru L-1), the PG ladderane (ru L-1), the sum of the PC and PG ladderanes (ru L-1), BHT (ru L-1) and BHT­-x (ru L-1), and BHT-x ratio.
a: below detection (b.d.)
Station (#)	Depth (mbss)	PC ladderane	PG ladderane	Sum IPLs	BHT	BHT-x	BHT-x ratio
1	10	b.d.a	b.d.	b.d.	4300000	b.d.	-
1	200	b.d.	b.d.	b.d.	4700000	220000	0.04
1	275	b.d.	b.d.	b.d.	2600000	b.d.	-
1	350	b.d.	b.d.	b.d.	9200000	b.d.	-
1	500	b.d.	b.d.	b.d.	1500000	b.d.	-
1	1000	b.d.	b.d.	b.d.	1400000	b.d.	-
1	1500	b.d.	b.d.	b.d.	2700000	210000	0.07
2	50	b.d.	b.d.	b.d.	11000000	b.d.	-
2	125	b.d.	b.d.	b.d.	1400000	b.d.	-
2	200	b.d.	b.d.	b.d.	2700000	b.d.	-
2	250	b.d.	b.d.	b.d.	2100000	140000	0.06
2	310	b.d.	b.d.	b.d.	2700000	200000	0.07
2	710	b.d.	b.d.	b.d.	8300000	1200000	0.13
3	60	b.d.	b.d.	b.d.	7000000	b.d.	-
3	75	b.d.	b.d.	b.d.	2500000	b.d.	-
3	100	b.d.	b.d.	b.d.	20000000	6000000	0.23
3	115	b.d.	b.d.	b.d.	18000000	6600000	0.27
4	30	b.d.	b.d.	b.d.	23000000	b.d.	-
4	45	b.d.	b.d.	b.d.	3900000	230000	0.06
4	60	b.d.	b.d.	b.d.	7400000	550000	0.07
4	92	81000	b.d.	81000	18000000	11000000	0.38
5	10	b.d.	b.d.	b.d.	19000000	b.d.	-
5	30	140000	98000	240000	36000000	8300000	0.19
5	62	130000	86000	220000	34000000	7800000	0.18
5	70	94000	170000	270000	23000000	5500000	0.19
5	85	110000	640000	750000	58000000	16000000	0.22
6	30	b.d.	b.d.	b.d.	7700000	b.d.	-
6	35	b.d.	b.d.	b.d.	14000000	b.d.	-
6	40	b.d.	b.d.	b.d.	7000000	b.d.	-
6	50	b.d.	b.d.	b.d.	12000000	850000	0.07
6	60	b.d.	b.d.	b.d.	210000000	8100000	0.04
6	85	b.d.	b.d.	b.d.	18000000	8300000	0.32
8	100	b.d.	b.d.	b.d.	640000	b.d.	-
8	200	b.d.	b.d.	b.d.	480000	b.d.	-
8	250	b.d.	b.d.	b.d.	110000	b.d.	-
8	300	b.d.	b.d.	b.d.	470000	180000	0.27
9	50	b.d.	b.d.	b.d.	18000000	b.d.	-
9	150	b.d.	b.d.	b.d.	5800000	b.d.	-
9	390	b.d.	b.d.	b.d.	9500000	1000000	0.1
10	10	b.d.	b.d.	b.d.	1200000	b.d.	-
10	30	b.d.	b.d.	b.d.	3700000	b.d.	-
10	60	150000	b.d.	150000	6200000	1400000	0.18
10	70	130000	35000	160000	3400000	760000	0.18
10	83	120000	93000	210000	10000000	2400000	0.19
18	55	b.d.	b.d.	b.d.	3800000	b.d.	-
18	70	b.d.	b.d.	b.d.	1500000	b.d.	-
18	80	b.d.	b.d.	b.d.	480000	b.d.	-
18	85	b.d.	b.d.	b.d.	1000000	b.d.	-
55	100	b.d.	b.d.	b.d.	5600000	b.d.	-
55	120	b.d.	b.d.	b.d.	5200000	b.d.	-
55	350	b.d.	b.d.	b.d.	4700000	b.d.	-
55	500	b.d.	b.d.	b.d.	2900000	b.d.	-
117	40	b.d.	b.d.	b.d.	b.d.	b.d.	-
117	50	b.d.	b.d.	b.d.	990000	b.d.	-
117	65	b.d.	b.d.	b.d.	100000	b.d.	-
117	85	86000	b.d.	86000	100000	b.d.	-
140	35	200000	b.d.	200000	38000000	5300000	0.12
140	40	98000	b.d.	98000	2600000	3200000	0.55
140	50	420000	b.d.	420000	2600000	1700000	0.4
140	65	21000	b.d.	21000	34000000	3800000	0.1
140	70	130000	b.d.	130000	4000000	1500000	0.27
140	85	180000	11000	200000	4800000	1900000	0.29
