# Supplementary material for: Bacteriohopanetetrol-x: constraining its application as a lipid biomarker for marine anammox using the water column oxygen gradient of the Benguela upwelling system
Source: Copernicus journal article supplement (doi:10.5194/bg-2021-257), 2021-10-05
Supplement: Supplementary file 4 [file Table_S4.xlsx]

## Sheet: Sheet1
	Ca. Scalindua biomass orbitrap file:	O1912057
	Date orbitrap run:	2019-12-06
Headgroup	IPL ladderane*	H+	NH4+	Abundance H+	Abundance NH4+		Precentage of peak area of IPL ladderane m/z ion to that of the peak area of the internal standard (DGTS-D9)
PC	C20[3] monoether-PC	530.361	x	*	x		***	High	(>80%)
	C20[5] monoether-PC	528.345	x	n.d.	x		**	Medium	(20-80%)
	PC with ester/ester linked C18[5] /C18[5]	770.476	x	n.d.	x		*	Low	(<20%)
	PC with ester/ester linked C18[3] /C18[3]	774.507	x	n.d.	x		n.d.	Not detected
	PC with ester/ester linked C20[3] /C20[3]	830.569	x	n.d.	x
	PC with ester/ester linked C20[5] /C20[5]	826.538	x	n.d.	x
	PC with ether/ester linked C20[3] /C14	740.559	x	n.d.	x		* The noted down combinations of ladderane FA tails is only one of sometimes many options possible, that all have the same m/z. Example: a m/z of 746.54830 can be a PC ether/ether linked C20[3]/C16[3] or a PC ether/ether linked C18[3]/C18[3]
	PC with ether/ester linked C18[5] /C18[5]	756.496	x	n.d.	x
	PC with ether/ester linked C18[3] /C18[3]	760.528	x	n.d.	x
	PC with ether/ester linked C20[3] /C18[5]	786.543	x	n.d.	x
	PC with ether/ester linked C20[3] /C18[3]	788.559	x	***	x
	PC with ether/ester linked C20[5] /C20[5]	812.559	x	n.d.	x
	PC with ether/ester linked C20[3] /C20[5]	814.575	x	n.d.	x
	PC with ether/ester linked C20[3] /C20[3]	816.59	x	**	x
	PC with ether /ether linked C20[3] /C14	726.58	x	n.d.	x
	PC with ether/ether linked C18[5] /C18[5]	742.517	x	n.d.	x
	PC with ether/ether linked 18[3] /C18[3]	746.548	x	n.d.	x
	PC with ether/ether linked C20[3] /C18[5]	772.564	x	n.d.	x
	PC with ether/ether linked C20[3] /C18[3]	774.58	x	n.d.	x
	PC with ether/ether linked C20[5] /C20[5]	798.58	x	n.d.	x
	PC with ether/ether linked C20[5] /C20[3]	800.595	x	n.d.	x
	PC with ether/ether linked C20[3] /C20[3]	802.611	x	n.d.	x
PE	C20[3] monoether-PE	488.314	x	**	x
	C20[5] monoether-PE	486.298	x	n.d.	x
	PE ester/ester linked C18[5] /C18[5]	718.481	x	*	x
	PE ester/ester linked C18[3] /C18[3]	732.459	x	*	x
	PE ester/ester linked C20[5] /C20[5]	784.491	x	n.d.	x
	PE ester/ester linked C20[3] /C20[3]	788.522	x	***	x
	PE with ether/ester linked C20[3] /C14	698.512	x	***	x
	PE with ether/ester linked C20[3] /C16	726.543	x	***	x
	PE ether/ester linked C18[5] /C18[5]	714.449	x	n.d.	x
	PE ether/ester linked C18[3] /C18[3]	728.429	x	n.d.	x
	PE with ether/ester linked C20[3]/C17	740.559	x	n.d.	x
	PE with ether/ester linked C20[3] /C18[5]	744.496	x	***	x
	PE with ether/ester linked C20[3] /C18[3]	746.512	x	***	x
	PE ether/ester linked C20[5] /C20[5]	770.512	x	**	x
	PE ether/ester linked C20[3] /C20[3]	774.543	x	***	x
	PE with ether/ether linked C20[3] /C18[3]	732.533	x	n.d.	x
	PE with ether/ether linked C20[3] /C14	684.533	x	n.d.	x
	PE with ether/ether linked C20[3] /C17	726.58	x	n.d.	x
	PE with ether/ether linked C20[3] /C20[5]	758.548	x	n.d.	x
	PE with ether/ether linked C20[5] /C20[5]	756.533	x	n.d.	x
	PE with ether/ether linked C18[3] /C18[3]	704.501	x	n.d.	x
	PE with ether/ether linked C18[5] /C18[5]	700.47	x	n.d.	x
	PE with ether/ether linked C20[3] /C20[3]	760.564	x	n.d.	x
PG	C20[3] monoether-PG	519.308	536.335	n.d.	n.d.
	C20[5] monoether-PG	517.292	534.319	n.d.	n.d.
	PG with ester/ester linked C18[5] /C18[5]	759.423	776.45	n.d.	n.d.
	PG with ester/ester linked C18[3] /C18[3]	763.454	780.481	n.d.	n.d.
	PG with ester/ester linked C20[5]/C20[5]	815.486	832.512	n.d.	n.d.
	PG with ester/ester linked C20[3] /C20[3]	819.517	836.544	n.d.	n.d.
	PG with ether/ester linked C20[3] /C14	729.506	746.533	***	n.d.
	PG with ether/ester linked C20[3] /C16	757.538	774.564	***	n.d.
	PG with ether/ester linked C18[5] /C18[5]	745.444	762.47	n.d.	n.d.
	PG with ether/ester linked C18[3] /C18[3]	749.475	766.502	n.d.	n.d.
	PG with ether/ester linked C20[3] /C17	771.553	788.58	***
	PG with ether/ester linked C20[3] /C18[5]	775.491	792.517	***	***
	PG with ether/ester linked C20[3] /C18[3]	777.506	794.533	***	***
	PG with ether/ester linked C20[3] /C20[5]	803.522	820.549	***	***
	PG with ether/ester linked C20[5] /C20[5]	801.506	818.533	**	n.d.
	PG with ether/ester linked C20[3] /C20[3]	805.538	822.564	***	**
	PG with ether/ether linked C20[3] /C16	743.559	760.585	***	n.d.
	PG with ether/ether linked C18[5] /C18[5]	731.465	748.491	n.d.	n.d.
	PG with ether/ether linked C18[3] /C18[3]	735.496	752.522	n.d.	n.d.
	PG with ether/ether linked C20[3] /C17	757.574	774.601	***	n.d.
	PG with ether/ether linked C20[3] /C18[5]	761.512	778.538	***	n.d.
	PG with ether/ether linked C20[3] /C18[3]	763.527	780.554	n.d.	n.d.
	PG with ether/ether linked C20[5] /C20[5]	787.527	804.554	n.d.	n.d.
	PG with ether/ether linked C20[3] /C20[5]	789.543	806.569	n.d.	n.d.
	PG with ether/ether linked C20[3] /C20[3]	791.559	808.581	***	n.d.
