# Supplementary material for: Bacteriohopanetetrol-x: constraining its application as a lipid biomarker for marine anammox using the water column oxygen gradient of the Benguela upwelling system
Source: Copernicus journal article supplement (doi:10.5194/bg-2021-257), 2021-10-05
Supplement: Supplementary file 5 [file Table_S5.xlsx]

## Sheet: Sheet1
Table S4. Concentration (in pg L-1) of C18[5], C18[3], C20[5] and C20[3] ladderane FAs, the sum of ladderane FAs, NL5 index, NL5 derived temperatures, and CTD measured temperatures in SPM sampled at St. 2, 6 and 140 at various water column depths.
a: SPM samples for which the NL5 index and/or the NL5 derived temperatures could not be calculated.
Station (#)	Depth (mbss)	C18[5]	C18[3]	C20[5]	C20[3]	Sum	NL5 index	NL5 temp.	CTD temp.
2	50	b.d.	b.d.	b.d.	b.d.	-	-a	-	13.8
2	125	b.d.	b.d.	4.3	10.5	14.8	-	-	12.7
2	200	b.d.	b.d.	b.d.	b.d.	-	-	-	11.7
2	250	13.8	4.8	93.6	208.2	320.4	0.87	21.1	11.2
2	310	b.d.	b.d.	b.d.	b.d.	-	-	-	10.3
2	710	16.4	11.9	14.4	31.7	74.4	0.47	15.6	5.5
6	30	b.d.	b.d.	5.2	13.5	18.7	-	-	13.1
6	35	b.d.	b.d.	b.d.	b.d.	-	-	-	12.7
6	40	b.d.	b.d.	b.d.	b.d.	-	-	-	12.6
6	60	10.8	4.7	3.4	9	27.9	0.24	12.1	12.5
6	85	62.1	24.1	13.8	39.9	139.9	0.18	-	12.4
140	35	13.3	7.2	3.6	12.4	36.6	0.21	10.1	13.4
140	40	4.5	2.8	3	5.2	15.4	0.4	14.9	13.4
140	50	21.5	12	6.4	18.9	58.8	0.23	11.6	13.3
140	65	8.1	3.2	2	7.5	20.9	0.2	7.4	13.2
140	70	18.2	8.1	5.1	18.7	50.1	0.22	10.9	13.2
140	85	21.2	10.3	5.4	15	51.9	0.2	7.8	13.1
