# Supplementary material for: Bacteriohopanetetrol-x: constraining its application as a lipid biomarker for marine anammox using the water column oxygen gradient of the Benguela upwelling system
Source: Copernicus journal article supplement (doi:10.5194/bg-2021-257), 2021-10-05
Supplement: Supplementary file 6 [file Table_S6.xlsx]

## Sheet: Total
		64PE449_S1D200	64PE449_S1D270	64PE449_S1D350	64PE449_S1D500	64PE449_S1D1000	64PE449_S1D700	64PE449_S1D1500	64PE449_S2D10	64PE449_S2D50	64PE449_S2D125	64PE449_S2D200	64PE449_S2D250	64PE449_S2D310	64PE449_S2D700	64PE449_S2D715	64PE449_S3D10	64PE449_S3D60	64PE449_S3D75	64PE449_S3D90	64PE449_S3D100	64PE449_S3D115	64PE449_S4D10	64PE449_S4D30	64PE449_S4D45	64PE449_S4D60	64PE449_S4D90	64PE449_S4D95	64PE449_S5D10	64PE449_S5D30	64PE449_S5D40	64PE449_S5D50	64PE449_S5D55	64PE449_S5D60	64PE449_S5D70	64PE449_S5D80	64PE449_S5D90	64PE449_S6D10	64PE449_S6D20	64PE449_S6D30	64PE449_S6D35	64PE449_S6D40	64PE449_S6D50	64PE449_S6D60	64PE449_S6D70	64PE449_S6D85	64PE449_S8D10	64PE449_S8D100	64PE449_S8D175
#OTU	#OTU ID	NIOZ169.001.002	NIOZ169.003.004	NIOZ169.005.006	NIOZ169.007.008	NIOZ169.011.012	NIOZ169.009.010	NIOZ169.013.014	NIOZ169.015.016	NIOZ169.017.018	NIOZ169.019.020	NIOZ169.021.022	NIOZ169.023.024	NIOZ169.025.026	NIOZ169.027.028	NIOZ169.029.030	NIOZ169.031.032	NIOZ169.033.034	NIOZ169.035.036	NIOZ169.037.038	NIOZ169.039.040	NIOZ169.041.042	NIOZ169.043.044	NIOZ169.045.046	NIOZ169.047.048	NIOZ169.049.050	NIOZ169.051.052	NIOZ169.053.054	NIOZ169.055.056	NIOZ169.057.058	NIOZ169.065.066	NIOZ169.067.068	NIOZ169.069.070	NIOZ169.071.072	NIOZ169.073.074	NIOZ169.075.076	NIOZ169.077.078	NIOZ169.079.080	NIOZ169.081.082	NIOZ169.083.084	NIOZ169.085.086	NIOZ169.087.088	NIOZ169.089.090	NIOZ169.091.092	NIOZ169.093.094	NIOZ169.095.096	NIOZ169.107.108	NIOZ169.109.110	NIOZ169.111.112
1	denovo502183	0	0	0	0	0	0	0	0	0	0	0	0	0	0.000966538	0.00044908	0	0	0	0	0	3.83519e-05	0	1.38384e-05	0	1.38792e-05	5.58555e-05	4.53456e-05	0	0	0	2.40085e-05	0.000144682	7.16076e-05	3.31462e-05	0.000139133	4.03398e-05	0	0	0	0	8.82753e-06	0	4.99853e-05	6.21594e-05	1.18864e-05	0	0	0
2	denovo977180	0	0	0	0	0	0	0	0	0	0	0	0	0	0.000202973	0.000193921	0	0	0	0	6.18104e-05	0	0	0	0	1.38792e-05	0	3.02304e-05	0	0	0	3.20113e-05	4.45177e-05	6.26566e-05	6.62925e-05	4.28101e-05	2.42039e-05	0	0	0	0	0	0	1.87445e-05	6.21594e-05	1.18864e-05	0	0	0
3	denovo848930	0	0	0	0	0	0	0	0	0	0	0	0	0	4.83269e-05	4.08255e-05	0	0	0	0	0	0	0	0	0	0	0	7.55761e-06	0	0	0	8.00282e-06	2.22588e-05	8.95095e-06	1.10487e-05	5.35126e-05	7.26117e-05	0	0	0	0	8.82753e-06	1.81863e-05	4.37372e-05	7.25193e-05	1.78297e-05	0	0	0
4	denovo341443	1.0416e-05	0	0	0	0	0	0	0	0	0	0	0	0	0.000115985	4.08255e-05	0	0	0	0	0	0	0	0	9.43352e-06	0	1.86185e-05	0	0	0	0	8.00282e-06	5.56471e-05	8.95095e-06	0	1.07025e-05	8.06796e-06	0	0	0	0	0	9.09314e-06	3.7489e-05	5.17995e-05	0	0	0	0
5	denovo844844	0	0	0	0	0	0	0	0	0	0	0	0	0	0	0	0	0	0	0	0	0	0	0	0	0	0	0	0	0	0	0	0	0	0	0	0	0	0	0	0	0	0	0	0	0	0	0	0
6	denovo1271636	0	0	0	0	0	0	0	0	0	0	0	0	0	1.93308e-05	1.02064e-05	0	0	0	0	0	0	0	0	0	0	0	0	0	0	0	0	1.11294e-05	2.68528e-05	1.10487e-05	0	0	0	0	0	0	0	0	6.24816e-06	0	0	0	0	0
7	denovo154358	0	0	0	0	0	0	0	0	0	0	0	0	0	9.66538e-06	0	0	0	0	0	0	0	0	0	0	0	0	0	0	0	0	0	1.11294e-05	0	2.20975e-05	0	0	0	0	0	0	0	0	0	1.03599e-05	0	0	0	0
8	denovo800152	0	0	0	0	0	0	0	0	0	0	0	0	0	9.66538e-06	0	0	0	0	0	0	0	0	0	0	0	0	0	0	0	0	0	1.11294e-05	8.95095e-06	0	3.21075e-05	0	0	0	0	0	0	0	0	0	0	0	0	0
9	denovo388950	0	0	0	0	0	0	0	0	0	0	0	0	0	0	1.02064e-05	0	0	0	0	0	0	0	0	0	0	0	0	0	0	0	0	0	0	0	1.07025e-05	8.06796e-06	0	0	0	0	0	0	0	0	0	0	0	0
10	denovo450919	0	0	0	0	0	0	0	0	0	0	0	0	0	0	0	0	0	0	0	0	0	0	0	0	0	0	7.55761e-06	0	0	0	0	0	0	1.10487e-05	1.07025e-05	0	0	0	0	0	0	0	0	0	0	0	0	0
11	denovo883379	0	0	0	0	0	0	0	0	0	0	0	0	0	0	0	0	0	0	0	0	0	0	0	0	0	0	7.55761e-06	0	0	0	0	0	0	0	0	8.06796e-06	0	0	0	0	0	0	0	2.07198e-05	0	0	0	0
12	denovo54047	0	0	0	0	0	0	0	0	0	0	0	0	0	0	0	0	0	0	0	0	1.2784e-05	0	0	0	0	0	0	0	0	0	0	0	0	0	0	8.06796e-06	0	0	0	0	0	9.09314e-06	0	1.03599e-05	0	0	0	0
13	denovo981606	0	0	0	0	0	0	0	0	0	0	0	0	0	0	0	0	0	0	0	0	0	0	0	0	0	0	0	0	0	0	0	2.22588e-05	0	1.10487e-05	1.07025e-05	0	0	0	0	0	0	0	0	0	0	0	0	0
14	denovo1413227	0	0	0	0	0	0	0	0	0	0	0	0	0	0	0	0	0	0	0	0	0	0	0	0	0	0	0	0	0	0	0	0	8.95095e-06	0	0	0	0	0	0	0	0	0	0	0	0	0	0	0
15	denovo657011	0	0	0	0	0	0	0	0	0	0	0	0	0	0	0	0	0	0	0	0	0	0	0	0	0	0	0	0	0	0	0	0	8.95095e-06	1.10487e-05	0	0	0	0	0	0	0	0	6.24816e-06	0	0	0	0	0
16	denovo73632	0	0	0	0	0	0	0	0	0	0	0	0	0	0	0	0	0	0	0	0	0	0	0	0	0	0	7.55761e-06	0	0	0	0	2.22588e-05	0	0	1.07025e-05	0	0	0	0	0	0	0	0	0	0	0	0	0
17	denovo1280850	0	0	0	0	0	0	0	0	0	0	0	0	0	9.66538e-06	1.02064e-05	0	0	0	0	0	0	0	0	0	0	0	0	0	0	0	0	0	0	0	0	0	0	0	0	0	0	0	0	0	0	0	0	0
18	denovo144604	0	0	0	0	0	0	0	0	0	0	0	0	0	0	0	0	0	0	0	0	0	0	0	0	0	0	7.55761e-06	0	0	0	0	0	0	0	0	0	0	0	0	0	0	0	0	0	0	0	0	0
19	denovo266109	0	0	0	0	0	0	0	0	0	0	0	0	0	0	0	0	0	0	0	0	0	0	0	0	0	0	0	0	0	0	0	0	0	0	0	0	0	0	0	0	0	0	0	0	0	0	0	0
20	denovo803687	0	0	0	0	0	0	0	0	0	0	0	0	0	0	0	0	0	0	0	0	0	0	0	0	0	0	0	0	0	0	0	0	0	0	0	0	0	0	0	0	0	0	0	0	0	0	0	0
21	denovo821938	0	0	0	0	0	0	0	0	0	0	0	0	0	0	0	0	0	0	0	0	0	0	0	0	0	0	0	0	0	0	0	0	0	0	0	0	0	0	0	0	0	0	0	0	0	0	0	0
22	denovo823486	0	0	0	0	0	0	0	0	0	0	0	0	0	9.66538e-06	0	0	0	0	0	0	0	0	0	0	0	0	0	0	0	0	0	1.11294e-05	0	1.10487e-05	0	0	0	0	0	0	0	0	0	0	0	0	0	0
23	denovo1044949	0	0	0	0	0	0	0	0	0	0	0	0	0	0	0	0	0	0	0	0	0	0	0	0	0	0	0	0	0	0	0	0	0	0	2.1405e-05	0	0	0	0	0	0	0	0	0	0	0	0	0
24	denovo1197486	0	0	0	0	0	0	0	0	0	0	0	0	0	0	0	0	0	0	0	0	0	0	0	0	0	0	0	0	0	0	0	0	0	0	0	0	0	0	0	0	0	0	0	0	0	0	0	0
25	denovo1333444	0	0	0	0	0	0	0	0	0	0	0	0	0	0	0	0	0	0	0	0	0	0	0	0	0	0	0	0	0	0	0	1.11294e-05	0	0	0	0	0	0	0	0	0	0	0	0	0	0	0	0
26	denovo1407127	0	0	0	0	0	0	0	0	0	0	0	0	0	0	0	0	0	0	0	0	0	0	0	0	0	0	0	0	0	0	0	0	0	0	0	8.06796e-06	0	0	0	0	0	0	0	0	0	0	0	0
27	denovo705496	0	0	0	0	0	0	0	0	0	0	0	0	0	0	0	0	0	0	0	0	0	0	0	0	0	0	0	0	0	0	0	0	0	0	0	0	0	0	0	0	0	0	0	0	0	0	0	0
28	denovo1001520	0	0	0	0	0	0	0	0	0	0	0	0	0	0	0	0	0	0	0	0	0	0	0	0	0	0	0	0	0	0	0	0	0	0	0	0	0	0	0	0	0	0	0	0	0	0	0	0
29	denovo1142426	0	0	0	0	0	0	0	0	0	0	0	0	0	0	0	0	0	0	0	0	0	0	0	0	0	0	0	0	0	0	0	0	0	0	0	8.06796e-06	0	0	0	0	0	0	0	0	0	0	0	0
30	denovo1273583	0	0	0	0	0	0	0	0	0	0	0	0	0	0	0	0	0	0	0	0	0	0	0	0	0	0	0	0	0	0	0	0	0	0	0	0	0	0	0	0	0	0	0	0	5.94322e-06	0	0	0
31	denovo1328437	0	0	0	0	0	0	0	0	0	0	0	0	0	0	0	0	0	0	0	0	0	0	0	0	0	0	0	0	0	0	0	0	0	0	0	0	0	0	0	0	0	0	0	0	0	0	0	0
32	denovo1335239	0	0	0	0	0	0	0	0	0	0	0	0	0	0	0	0	0	0	0	0	0	0	0	0	0	0	0	0	0	0	0	0	0	0	0	0	0	0	0	0	0	0	0	1.03599e-05	0	0	0	0
33	denovo1347810	0	0	0	0	0	0	0	0	0	0	0	0	0	1.93308e-05	0	0	0	0	0	0	0	0	0	0	0	0	0	0	0	0	0	0	0	0	0	0	0	0	0	0	0	0	0	0	0	0	0	0
34	denovo1364089	0	0	0	0	0	0	0	0	0	0	0	0	0	0	2.04127e-05	0	0	0	0	0	0	0	0	0	0	1.86185e-05	0	0	0	0	0	0	0	0	0	0	0	0	0	0	0	0	0	0	0	0	0	0
35	denovo177727	0	0	0	0	0	0	0	0	0	0	0	0	0	0	1.02064e-05	0	0	0	0	0	0	0	0	0	0	0	0	0	0	0	0	0	0	0	0	0	0	0	0	0	0	0	0	0	0	0	0	0
36	denovo234017	0	0	0	0	0	0	0	0	0	0	0	0	0	0	0	0	0	0	0	0	0	0	0	0	0	0	0	0	0	0	0	0	0	1.10487e-05	0	0	0	0	0	0	0	0	0	0	0	0	0	0
37	denovo236359	0	0	0	0	0	0	0	0	0	0	0	0	0	0	0	0	0	0	0	0	0	0	0	0	0	0	0	0	0	0	0	0	0	0	0	0	0	0	0	0	0	0	0	1.03599e-05	0	0	0	0
38	denovo489736	0	0	0	0	0	0	0	0	0	0	0	0	0	0	0	0	0	0	0	0	0	0	0	0	0	0	0	0	0	0	0	0	0	0	0	0	0	0	0	0	0	0	0	0	0	0	0	0
39	denovo657259	0	0	0	0	0	0	0	0	0	0	0	0	0	0	0	0	0	0	0	0	0	0	0	0	0	0	0	0	0	0	0	0	0	0	0	0	0	0	0	0	0	0	0	0	0	0	0	0
40	denovo97957	0	0	0	0	0	0	0	0	0	0	0	0	0	0	0	0	0	0	0	0	0	0	0	0	0	0	0	0	0	0	0	0	0	0	0	8.06796e-06	0	0	0	0	0	0	0	0	0	0	0	0
41	denovo1072759	0	0	0	0	0	0	0	0	0	0	0	0	0	0	0	0	0	0	0	0	0	0	0	0	0	0	0	0	0	0	0	0	0	0	0	0	0	0	0	0	0	0	0	0	0	0	0	0
42	denovo108689	0	0	0	0	0	0	0	0	0	0	0	0	0	0	0	0	0	0	0	0	0	0	0	0	0	0	0	0	0	0	0	0	0	0	0	0	0	0	0	0	0	0	0	0	0	0	0	0
43	denovo1096988	0	0	0	0	0	0	0	0	0	0	0	0	0	0	0	0	0	0	0	0	0	0	0	0	0	0	0	0	0	0	0	0	0	0	0	0	0	0	0	0	0	0	0	0	0	0	0	0
44	denovo1109115	0	0	0	0	0	0	0	0	0	0	0	0	0	0	0	0	0	0	0	0	0	0	0	0	0	1.86185e-05	0	0	0	0	0	0	0	0	0	0	0	0	0	0	0	0	0	0	0	0	0	0
45	denovo117950	0	0	0	0	0	0	0	0	0	0	0	0	0	0	0	0	0	0	0	0	0	0	0	0	0	0	0	0	0	0	0	0	0	0	0	0	0	0	0	0	0	0	0	0	0	0	0	0
46	denovo1181650	0	0	0	0	0	0	0	0	0	0	0	0	0	0	0	0	0	0	0	0	0	0	0	0	0	0	0	0	0	0	0	0	8.95095e-06	0	0	0	0	0	0	0	0	0	0	0	0	0	0	0
47	denovo1215228	0	0	0	0	0	0	0	0	0	0	0	0	0	0	0	0	0	0	0	0	0	0	0	0	0	0	0	0	0	0	0	0	0	0	0	0	0	0	0	0	0	0	0	0	0	0	0	0
48	denovo1222716	0	0	0	0	0	0	0	0	0	0	0	0	0	0	0	0	0	0	0	0	0	0	0	0	0	0	0	0	0	0	0	0	0	0	0	0	0	0	0	0	0	0	0	2.07198e-05	0	0	0	0
49	denovo123659	1.0416e-05	0	0	0	0	0	0	0	0	0	0	0	0	0	0	0	0	0	0	0	0	0	0	0	0	0	0	0	0	0	0	0	0	0	0	0	0	0	0	0	0	0	0	0	0	0	0	0
50	denovo1351344	0	0	0	0	0	0	0	0	0	0	0	0	0	0	0	0	0	0	0	0	0	0	0	0	0	0	0	0	0	0	0	0	0	0	0	0	0	0	0	0	0	0	0	0	0	0	0	0
51	denovo1393462	0	0	0	0	0	0	0	0	0	0	0	0	0	9.66538e-06	0	0	0	0	0	0	0	0	0	0	0	0	0	0	0	0	0	0	0	0	0	0	0	0	0	0	0	0	0	0	0	0	0	0
52	denovo1428431	0	0	0	0	0	0	0	0	0	0	0	0	0	0	0	0	0	0	0	0	0	0	0	0	0	0	0	0	0	0	0	0	0	0	0	0	0	0	0	0	0	0	0	0	0	0	0	0
53	denovo1451165	0	0	0	0	0	0	0	0	0	0	0	0	0	0	0	0	0	0	0	0	0	0	0	0	0	0	0	0	0	0	0	0	0	1.10487e-05	0	0	0	0	0	0	0	0	0	0	0	0	0	0
54	denovo1460593	0	0	0	0	0	0	0	0	0	0	0	0	0	0	0	0	0	0	0	0	0	0	0	0	0	0	0	0	0	0	0	0	0	0	0	0	0	0	0	0	0	0	0	0	0	0	0	0
55	denovo203437	0	0	0	0	0	0	0	0	0	0	0	0	0	9.66538e-06	0	0	0	0	0	0	0	0	0	0	0	0	0	0	0	0	0	0	0	0	0	0	0	0	0	0	0	0	0	0	0	0	0	0
56	denovo287398	0	0	0	0	0	0	0	0	0	0	0	0	0	0	0	0	0	0	0	0	0	0	0	0	0	0	0	0	0	0	0	1.11294e-05	0	0	0	0	0	0	0	0	0	0	0	0	0	0	0	0
57	denovo328172	0	0	0	0	0	0	0	0	0	0	0	0	0	0	0	0	0	0	0	0	0	0	0	0	0	0	0	0	0	0	0	0	0	0	0	0	0	0	0	0	0	0	0	0	0	0	0	0
58	denovo357009	0	0	0	0	0	0	0	0	0	0	0	0	0	0	0	0	0	0	0	0	0	0	0	0	0	0	0	0	0	0	0	0	0	0	0	0	0	0	0	0	0	0	0	0	0	0	0	0
59	denovo564247	0	0	0	0	0	0	0	0	0	0	0	0	0	9.66538e-06	0	0	0	0	0	0	0	0	0	0	0	0	0	0	0	0	0	0	0	0	0	0	0	0	0	0	0	0	0	0	0	0	0	0
60	denovo724135	0	0	0	0	0	0	0	0	0	0	0	0	0	0	0	0	0	0	0	0	0	0	0	0	0	0	0	0	0	0	0	0	0	0	0	0	0	0	0	0	0	0	0	0	5.94322e-06	0	0	0
61	denovo731807	0	0	0	0	0	0	0	0	0	0	0	0	0	0	0	0	0	0	0	0	0	0	0	0	0	0	0	0	0	0	0	0	0	0	0	0	0	0	0	0	0	0	0	0	5.94322e-06	0	0	0
62	denovo804484	0	0	0	0	0	0	0	0	0	0	0	0	0	0	0	0	0	0	0	0	0	0	0	0	0	0	0	0	0	0	0	0	0	0	0	0	0	0	0	0	0	0	0	0	0	0	0	0
63	denovo873744	0	0	0	0	0	0	0	0	0	0	0	0	0	0	0	0	0	0	0	0	0	0	0	0	0	0	0	0	0	0	0	0	0	0	0	0	0	0	0	0	0	0	0	0	0	0	0	0
64	denovo923256	0	0	0	0	0	0	0	0	0	0	0	0	0	9.66538e-06	0	0	0	0	0	0	0	0	0	0	0	0	0	0	0	0	0	0	0	0	0	0	0	0	0	0	0	0	0	0	0	0	0	0
65	denovo938878	0	0	0	0	0	0	0	0	0	0	0	0	0	0	0	0	0	0	0	0	0	0	0	0	0	0	7.55761e-06	0	0	0	0	0	0	0	0	0	0	0	0	0	0	0	0	0	0	0	0	0
66	denovo954186	0	0	0	0	0	0	0	0	0	0	0	0	0	0	0	0	0	0	0	0	0	0	0	0	0	0	0	0	0	0	0	0	0	0	0	0	0	0	0	0	0	0	0	0	0	0	0	0
Total # of bacterial reads in sample		96006	89802	88191	92502	58175	87287	77599	124189	101420	75388	64842	85934	99551	103462	97978	216338	46358	41583	21481	32357	78223	289725	144525	106005	144101	53710	132317	168086	104691	65088	124956	89852	111720	90508	93436	123947	155020	153691	154658	79672	113282	109973	160047	96526	168259	169848	82489	83411
Total # of Scalindua reads in sample		2	0	0	0	0	0	0	0	0	0	0	0	0	150	77	0	0	0	0	2	4	0	2	1	4	6	16	0	0	0	9	34	24	19	32	24	0	0	0	0	2	4	26	32	10	0	0	0
Relative abundance Scalindua in sample (permille)		0.020832	0	0	0	0	0	0	0	0	0	0	0	0	1.44981	0.785891	0	0	0	0	0.0618104	0.0511359	0	0.0138384	0.00943352	0.0277583	0.111711	0.120922	0	0	0	0.0720254	0.3784	0.214823	0.209926	0.34248	0.193631	0	0	0	0	0.0176551	0.0363726	0.162452	0.331517	0.0594322	0	0	0
[truncated: 37 more columns]

## Sheet: Shelf stations
		64PE449_S3D10	64PE449_S3D60	64PE449_S3D75	64PE449_S3D90	64PE449_S3D100	64PE449_S3D115	64PE449_S4D10	64PE449_S4D30	64PE449_S4D45	64PE449_S4D60	64PE449_S4D90	64PE449_S4D95	64PE449_S5D10	64PE449_S5D30	64PE449_S5D40	64PE449_S5D50	64PE449_S5D55	64PE449_S5D60	64PE449_S5D70	64PE449_S5D80	64PE449_S5D90	64PE449_S6D10	64PE449_S6D20	64PE449_S6D30	64PE449_S6D35	64PE449_S6D40	64PE449_S6D50	64PE449_S6D60	64PE449_S6D70	64PE449_S6D85	64PE449_S10D10	64PE449_S10D30	64PE449_S10D50	64PE449_S10D60	64PE449_S10D70	64PE449_S10D74	64PE449_S10D83	64PE450_S18D10	64PE450_S18D55	64PE450_S18D70	64PE450_S18D80	64PE450_S18D85	64PE450_S18D90	64PE450_S117D10	64PE450_S117D39	64PE450_S117D50	64PE450_S117D65	64PE450_S117D85
#OTU	#OTU ID	NIOZ169.031.032	NIOZ169.033.034	NIOZ169.035.036	NIOZ169.037.038	NIOZ169.039.040	NIOZ169.041.042	NIOZ169.043.044	NIOZ169.045.046	NIOZ169.047.048	NIOZ169.049.050	NIOZ169.051.052	NIOZ169.053.054	NIOZ169.055.056	NIOZ169.057.058	NIOZ169.065.066	NIOZ169.067.068	NIOZ169.069.070	NIOZ169.071.072	NIOZ169.073.074	NIOZ169.075.076	NIOZ169.077.078	NIOZ169.079.080	NIOZ169.081.082	NIOZ169.083.084	NIOZ169.085.086	NIOZ169.087.088	NIOZ169.089.090	NIOZ169.091.092	NIOZ169.093.094	NIOZ169.095.096	NIOZ169.127.128	NIOZ169.129.130	NIOZ169.131.132	NIOZ169.133.134	NIOZ169.135.136	NIOZ169.137.138	NIOZ169.139.140	NIOZ169.141.142	NIOZ169.143.144	NIOZ169.145.146	NIOZ169.147.148	NIOZ169.149.150	NIOZ169.151.152	NIOZ169.161.162	NIOZ169.163.164	NIOZ169.165.166	NIOZ169.167.168	NIOZ169.169.170
1	denovo502183	0	0	0	0	0	3.83519e-05	0	1.38384e-05	0	1.38792e-05	5.58555e-05	4.53456e-05	0	0	0	2.40085e-05	0.000144682	7.16076e-05	3.31462e-05	0.000139133	4.03398e-05	0	0	0	0	8.82753e-06	0	4.99853e-05	6.21594e-05	1.18864e-05	0	0	7.83441e-06	1.40763e-05	0.000288207	0.000342679	0.00103483	0	0	0	0	0	0	0	0	0	0	0
2	denovo977180	0	0	0	0	6.18104e-05	0	0	0	0	1.38792e-05	0	3.02304e-05	0	0	0	3.20113e-05	4.45177e-05	6.26566e-05	6.62925e-05	4.28101e-05	2.42039e-05	0	0	0	0	0	0	1.87445e-05	6.21594e-05	1.18864e-05	0	0	0	0	8.43532e-05	0.000164486	0.000529449	0	0	0	0	0	0	0	0	0	0	7.65861e-06
3	denovo848930	0	0	0	0	0	0	0	0	0	0	0	7.55761e-06	0	0	0	8.00282e-06	2.22588e-05	8.95095e-06	1.10487e-05	5.35126e-05	7.26117e-05	0	0	0	0	8.82753e-06	1.81863e-05	4.37372e-05	7.25193e-05	1.78297e-05	0	0	0	0	4.21766e-05	2.05608e-05	0.000352966	0	0	0	0	0	0	0	0	0	0	0
4	denovo341443	0	0	0	0	0	0	0	0	9.43352e-06	0	1.86185e-05	0	0	0	0	8.00282e-06	5.56471e-05	8.95095e-06	0	1.07025e-05	8.06796e-06	0	0	0	0	0	9.09314e-06	3.7489e-05	5.17995e-05	0	0	0	0	0	2.10883e-05	8.2243e-05	8.82414e-05	0	0	0	0	0	0	0	0	0	0	0
5	denovo844844	0	0	0	0	0	0	0	0	0	0	0	0	0	0	0	0	0	0	0	0	0	0	0	0	0	0	0	0	0	0	0	0	0	0	0	0	0	0	0	0	0	0	0	0	0	0	0	0
6	denovo1271636	0	0	0	0	0	0	0	0	0	0	0	0	0	0	0	0	1.11294e-05	2.68528e-05	1.10487e-05	0	0	0	0	0	0	0	0	6.24816e-06	0	0	0	0	0	7.03814e-06	7.02943e-06	1.37072e-05	2.40658e-05	0	0	0	0	0	0	0	0	0	0	0
7	denovo154358	0	0	0	0	0	0	0	0	0	0	0	0	0	0	0	0	1.11294e-05	0	2.20975e-05	0	0	0	0	0	0	0	0	0	1.03599e-05	0	0	0	0	0	7.02943e-06	1.37072e-05	8.02195e-05	0	0	0	0	0	0	0	0	0	0	0
8	denovo800152	0	0	0	0	0	0	0	0	0	0	0	0	0	0	0	0	1.11294e-05	8.95095e-06	0	3.21075e-05	0	0	0	0	0	0	0	0	0	0	0	0	0	0	7.02943e-06	2.05608e-05	2.40658e-05	0	0	0	0	0	0	0	0	0	0	0
9	denovo388950	0	0	0	0	0	0	0	0	0	0	0	0	0	0	0	0	0	0	0	1.07025e-05	8.06796e-06	0	0	0	0	0	0	0	0	0	0	0	0	0	2.10883e-05	1.37072e-05	8.02195e-06	0	0	0	0	0	0	0	0	0	0	0
10	denovo450919	0	0	0	0	0	0	0	0	0	0	0	7.55761e-06	0	0	0	0	0	0	1.10487e-05	1.07025e-05	0	0	0	0	0	0	0	0	0	0	0	0	0	0	0	0	7.21975e-05	0	0	0	0	0	0	0	0	0	0	0
11	denovo883379	0	0	0	0	0	0	0	0	0	0	0	7.55761e-06	0	0	0	0	0	0	0	0	8.06796e-06	0	0	0	0	0	0	0	2.07198e-05	0	0	0	0	0	7.02943e-06	2.05608e-05	3.20878e-05	0	0	0	0	0	0	0	0	0	0	0
12	denovo54047	0	0	0	0	0	1.2784e-05	0	0	0	0	0	0	0	0	0	0	0	0	0	0	8.06796e-06	0	0	0	0	0	9.09314e-06	0	1.03599e-05	0	0	0	0	0	1.40589e-05	6.85359e-06	2.40658e-05	0	0	0	0	0	0	0	0	0	0	0
13	denovo981606	0	0	0	0	0	0	0	0	0	0	0	0	0	0	0	0	2.22588e-05	0	1.10487e-05	1.07025e-05	0	0	0	0	0	0	0	0	0	0	0	0	0	0	0	6.85359e-06	0	0	0	0	0	0	0	0	0	0	0	0
14	denovo1413227	0	0	0	0	0	0	0	0	0	0	0	0	0	0	0	0	0	8.95095e-06	0	0	0	0	0	0	0	0	0	0	0	0	0	0	0	0	0	0	3.20878e-05	0	0	0	0	0	0	0	0	0	0	0
15	denovo657011	0	0	0	0	0	0	0	0	0	0	0	0	0	0	0	0	0	8.95095e-06	1.10487e-05	0	0	0	0	0	0	0	0	6.24816e-06	0	0	0	0	0	0	7.02943e-06	0	0	0	0	0	0	0	0	0	0	0	0	0
16	denovo73632	0	0	0	0	0	0	0	0	0	0	0	7.55761e-06	0	0	0	0	2.22588e-05	0	0	1.07025e-05	0	0	0	0	0	0	0	0	0	0	0	0	0	0	0	0	0	0	0	0	0	0	0	0	0	0	0	0
17	denovo1280850	0	0	0	0	0	0	0	0	0	0	0	0	0	0	0	0	0	0	0	0	0	0	0	0	0	0	0	0	0	0	0	0	0	0	0	0	1.60439e-05	0	0	0	0	0	0	0	0	0	0	0
18	denovo144604	0	0	0	0	0	0	0	0	0	0	0	7.55761e-06	0	0	0	0	0	0	0	0	0	0	0	0	0	0	0	0	0	0	0	0	0	0	0	6.85359e-06	1.60439e-05	0	0	0	0	0	0	0	0	0	0	0
19	denovo266109	0	0	0	0	0	0	0	0	0	0	0	0	0	0	0	0	0	0	0	0	0	0	0	0	0	0	0	0	0	0	0	0	0	0	0	0	0	0	0	0	0	0	0	0	0	0	0	0
20	denovo803687	0	0	0	0	0	0	0	0	0	0	0	0	0	0	0	0	0	0	0	0	0	0	0	0	0	0	0	0	0	0	0	0	0	0	7.02943e-06	1.37072e-05	1.60439e-05	0	0	0	0	0	0	0	0	0	0	0
21	denovo821938	0	0	0	0	0	0	0	0	0	0	0	0	0	0	0	0	0	0	0	0	0	0	0	0	0	0	0	0	0	0	0	0	0	0	7.02943e-06	6.85359e-06	2.40658e-05	0	0	0	0	0	0	0	0	0	0	0
22	denovo823486	0	0	0	0	0	0	0	0	0	0	0	0	0	0	0	0	1.11294e-05	0	1.10487e-05	0	0	0	0	0	0	0	0	0	0	0	0	0	0	0	7.02943e-06	0	8.02195e-06	0	0	0	0	0	0	0	0	0	0	0
23	denovo1044949	0	0	0	0	0	0	0	0	0	0	0	0	0	0	0	0	0	0	0	2.1405e-05	0	0	0	0	0	0	0	0	0	0	0	0	0	0	0	6.85359e-06	8.02195e-06	0	0	0	0	0	0	0	0	0	0	0
24	denovo1197486	0	0	0	0	0	0	0	0	0	0	0	0	0	0	0	0	0	0	0	0	0	0	0	0	0	0	0	0	0	0	0	0	0	0	0	6.85359e-06	2.40658e-05	0	0	0	0	0	0	0	0	0	0	0
25	denovo1333444	0	0	0	0	0	0	0	0	0	0	0	0	0	0	0	0	1.11294e-05	0	0	0	0	0	0	0	0	0	0	0	0	0	0	0	0	0	0	0	8.02195e-06	0	0	0	0	0	0	0	0	0	0	0
26	denovo1407127	0	0	0	0	0	0	0	0	0	0	0	0	0	0	0	0	0	0	0	0	8.06796e-06	0	0	0	0	0	0	0	0	0	0	0	0	0	7.02943e-06	1.37072e-05	0	0	0	0	0	0	0	0	0	0	0	0
27	denovo705496	0	0	0	0	0	0	0	0	0	0	0	0	0	0	0	0	0	0	0	0	0	0	0	0	0	0	0	0	0	0	0	0	0	0	0	0	3.20878e-05	0	0	0	0	0	0	0	0	0	0	0
28	denovo1001520	0	0	0	0	0	0	0	0	0	0	0	0	0	0	0	0	0	0	0	0	0	0	0	0	0	0	0	0	0	0	0	0	0	0	0	6.85359e-06	1.60439e-05	0	0	0	0	0	0	0	0	0	0	0
29	denovo1142426	0	0	0	0	0	0	0	0	0	0	0	0	0	0	0	0	0	0	0	0	8.06796e-06	0	0	0	0	0	0	0	0	0	0	0	0	0	0	1.37072e-05	0	0	0	0	0	0	0	0	0	0	0	0
30	denovo1273583	0	0	0	0	0	0	0	0	0	0	0	0	0	0	0	0	0	0	0	0	0	0	0	0	0	0	0	0	0	5.94322e-06	0	0	0	0	0	0	8.02195e-06	0	0	0	0	0	0	0	0	0	0	0
31	denovo1328437	0	0	0	0	0	0	0	0	0	0	0	0	0	0	0	0	0	0	0	0	0	0	0	0	0	0	0	0	0	0	0	0	0	0	0	6.85359e-06	1.60439e-05	0	0	0	0	0	0	0	0	0	0	0
32	denovo1335239	0	0	0	0	0	0	0	0	0	0	0	0	0	0	0	0	0	0	0	0	0	0	0	0	0	0	0	0	1.03599e-05	0	0	0	0	0	0	0	0	0	0	0	0	0	0	0	0	0	0	0
33	denovo1347810	0	0	0	0	0	0	0	0	0	0	0	0	0	0	0	0	0	0	0	0	0	0	0	0	0	0	0	0	0	0	0	0	0	0	0	0	0	0	0	0	0	0	0	0	0	0	0	0
34	denovo1364089	0	0	0	0	0	0	0	0	0	0	1.86185e-05	0	0	0	0	0	0	0	0	0	0	0	0	0	0	0	0	0	0	0	0	0	0	0	0	0	0	0	0	0	0	0	0	0	0	0	0	0
35	denovo177727	0	0	0	0	0	0	0	0	0	0	0	0	0	0	0	0	0	0	0	0	0	0	0	0	0	0	0	0	0	0	0	0	0	0	0	0	1.60439e-05	0	0	0	0	0	0	0	0	0	0	0
36	denovo234017	0	0	0	0	0	0	0	0	0	0	0	0	0	0	0	0	0	0	1.10487e-05	0	0	0	0	0	0	0	0	0	0	0	0	0	0	0	7.02943e-06	0	0	0	0	0	0	0	0	0	0	0	0	0
37	denovo236359	0	0	0	0	0	0	0	0	0	0	0	0	0	0	0	0	0	0	0	0	0	0	0	0	0	0	0	0	1.03599e-05	0	0	0	0	0	0	0	1.60439e-05	0	0	0	0	0	0	0	0	0	0	0
38	denovo489736	0	0	0	0	0	0	0	0	0	0	0	0	0	0	0	0	0	0	0	0	0	0	0	0	0	0	0	0	0	0	0	0	0	0	7.02943e-06	6.85359e-06	8.02195e-06	0	0	0	0	0	0	0	0	0	0	0
39	denovo657259	0	0	0	0	0	0	0	0	0	0	0	0	0	0	0	0	0	0	0	0	0	0	0	0	0	0	0	0	0	0	0	0	0	0	0	6.85359e-06	0	0	0	0	0	0	0	0	0	0	0	0
40	denovo97957	0	0	0	0	0	0	0	0	0	0	0	0	0	0	0	0	0	0	0	0	8.06796e-06	0	0	0	0	0	0	0	0	0	0	0	0	0	0	0	0	0	0	0	0	0	0	0	0	0	0	0
41	denovo1072759	0	0	0	0	0	0	0	0	0	0	0	0	0	0	0	0	0	0	0	0	0	0	0	0	0	0	0	0	0	0	0	0	0	0	0	0	8.02195e-06	0	0	0	0	0	0	0	0	0	0	0
42	denovo108689	0	0	0	0	0	0	0	0	0	0	0	0	0	0	0	0	0	0	0	0	0	0	0	0	0	0	0	0	0	0	0	0	0	0	0	0	1.60439e-05	0	0	0	0	0	0	0	0	0	0	0
43	denovo1096988	0	0	0	0	0	0	0	0	0	0	0	0	0	0	0	0	0	0	0	0	0	0	0	0	0	0	0	0	0	0	0	0	0	0	0	0	8.02195e-06	0	0	0	0	0	0	0	0	0	0	0
44	denovo1109115	0	0	0	0	0	0	0	0	0	0	1.86185e-05	0	0	0	0	0	0	0	0	0	0	0	0	0	0	0	0	0	0	0	0	0	0	0	0	0	0	0	0	0	0	0	0	0	0	0	0	0
45	denovo117950	0	0	0	0	0	0	0	0	0	0	0	0	0	0	0	0	0	0	0	0	0	0	0	0	0	0	0	0	0	0	0	0	0	0	0	0	0	0	0	0	0	0	0	0	0	0	0	0
46	denovo1181650	0	0	0	0	0	0	0	0	0	0	0	0	0	0	0	0	0	8.95095e-06	0	0	0	0	0	0	0	0	0	0	0	0	0	0	0	0	0	6.85359e-06	0	0	0	0	0	0	0	0	0	0	0	0
47	denovo1215228	0	0	0	0	0	0	0	0	0	0	0	0	0	0	0	0	0	0	0	0	0	0	0	0	0	0	0	0	0	0	0	0	0	0	0	0	8.02195e-06	0	0	0	0	0	0	0	0	0	0	0
48	denovo1222716	0	0	0	0	0	0	0	0	0	0	0	0	0	0	0	0	0	0	0	0	0	0	0	0	0	0	0	0	2.07198e-05	0	0	0	0	0	0	0	0	0	0	0	0	0	0	0	0	0	0	0
49	denovo123659	0	0	0	0	0	0	0	0	0	0	0	0	0	0	0	0	0	0	0	0	0	0	0	0	0	0	0	0	0	0	0	0	0	0	0	0	0	0	0	0	0	0	0	0	0	0	0	0
50	denovo1351344	0	0	0	0	0	0	0	0	0	0	0	0	0	0	0	0	0	0	0	0	0	0	0	0	0	0	0	0	0	0	0	0	0	0	0	0	1.60439e-05	0	0	0	0	0	0	0	0	0	0	0
51	denovo1393462	0	0	0	0	0	0	0	0	0	0	0	0	0	0	0	0	0	0	0	0	0	0	0	0	0	0	0	0	0	0	0	0	0	0	7.02943e-06	0	0	0	0	0	0	0	0	0	0	0	0	0
52	denovo1428431	0	0	0	0	0	0	0	0	0	0	0	0	0	0	0	0	0	0	0	0	0	0	0	0	0	0	0	0	0	0	0	0	0	0	0	0	8.02195e-06	0	0	0	0	0	0	0	0	0	0	0
53	denovo1451165	0	0	0	0	0	0	0	0	0	0	0	0	0	0	0	0	0	0	1.10487e-05	0	0	0	0	0	0	0	0	0	0	0	0	0	0	0	0	0	8.02195e-06	0	0	0	0	0	0	0	0	0	0	0
54	denovo1460593	0	0	0	0	0	0	0	0	0	0	0	0	0	0	0	0	0	0	0	0	0	0	0	0	0	0	0	0	0	0	0	0	0	0	7.02943e-06	0	8.02195e-06	0	0	0	0	0	0	0	0	0	0	0
55	denovo203437	0	0	0	0	0	0	0	0	0	0	0	0	0	0	0	0	0	0	0	0	0	0	0	0	0	0	0	0	0	0	0	0	0	0	0	0	0	0	0	0	0	0	0	0	0	0	0	0
56	denovo287398	0	0	0	0	0	0	0	0	0	0	0	0	0	0	0	0	1.11294e-05	0	0	0	0	0	0	0	0	0	0	0	0	0	0	0	0	0	0	0	8.02195e-06	0	0	0	0	0	0	0	0	0	0	0
57	denovo328172	0	0	0	0	0	0	0	0	0	0	0	0	0	0	0	0	0	0	0	0	0	0	0	0	0	0	0	0	0	0	0	0	0	0	0	0	1.60439e-05	0	0	0	0	0	0	0	0	0	0	0
58	denovo357009	0	0	0	0	0	0	0	0	0	0	0	0	0	0	0	0	0	0	0	0	0	0	0	0	0	0	0	0	0	0	0	0	0	0	0	6.85359e-06	8.02195e-06	0	0	0	0	0	0	0	0	0	0	0
59	denovo564247	0	0	0	0	0	0	0	0	0	0	0	0	0	0	0	0	0	0	0	0	0	0	0	0	0	0	0	0	0	0	0	0	0	0	0	0	0	0	0	0	0	0	0	0	0	0	0	0
60	denovo724135	0	0	0	0	0	0	0	0	0	0	0	0	0	0	0	0	0	0	0	0	0	0	0	0	0	0	0	0	0	5.94322e-06	0	0	0	0	0	6.85359e-06	0	0	0	0	0	0	0	0	0	0	0	0
61	denovo731807	0	0	0	0	0	0	0	0	0	0	0	0	0	0	0	0	0	0	0	0	0	0	0	0	0	0	0	0	0	5.94322e-06	0	0	0	0	7.02943e-06	0	0	0	0	0	0	0	0	0	0	0	0	0
62	denovo804484	0	0	0	0	0	0	0	0	0	0	0	0	0	0	0	0	0	0	0	0	0	0	0	0	0	0	0	0	0	0	0	0	0	0	0	6.85359e-06	8.02195e-06	0	0	0	0	0	0	0	0	0	0	0
63	denovo873744	0	0	0	0	0	0	0	0	0	0	0	0	0	0	0	0	0	0	0	0	0	0	0	0	0	0	0	0	0	0	0	0	0	0	0	0	8.02195e-06	0	0	0	0	0	0	0	0	0	0	0
64	denovo923256	0	0	0	0	0	0	0	0	0	0	0	0	0	0	0	0	0	0	0	0	0	0	0	0	0	0	0	0	0	0	0	0	0	7.03814e-06	0	0	0	0	0	0	0	0	0	0	0	0	0	0
65	denovo938878	0	0	0	0	0	0	0	0	0	0	0	7.55761e-06	0	0	0	0	0	0	0	0	0	0	0	0	0	0	0	0	0	0	0	0	0	0	0	0	0	0	0	0	0	0	0	0	0	0	0	0
66	denovo954186	0	0	0	0	0	0	0	0	0	0	0	0	0	0	0	0	0	0	0	0	0	0	0	0	0	0	0	0	0	0	0	0	0	0	0	6.85359e-06	0	0	0	0	0	0	0	0	0	0	0	0
Total # of bacterial reads in sample		216338	46358	41583	21481	32357	78223	289725	144525	106005	144101	53710	132317	168086	104691	65088	124956	89852	111720	90508	93436	123947	155020	153691	154658	79672	113282	109973	160047	96526	168259	200043	89502	127642	142083	142259	145909	124658	176728	121143	96701	141691	79304	109394	169448	146733	93871	139883	130572
Total # of Scalindua reads in sample		0	0	0	0	2	4	0	2	1	4	6	16	0	0	0	9	34	24	19	32	24	0	0	0	0	2	4	26	32	10	0	0	1	4	81	122	332	0	0	0	0	0	0	0	0	0	0	1
Relative abundance Scalindua in sample (permille)		0	0	0	0	0.0618104	0.0511359	0	0.0138384	0.00943352	0.0277583	0.111711	0.120922	0	0	0	0.0720254	0.3784	0.214823	0.209926	0.34248	0.193631	0	0	0	0	0.0176551	0.0363726	0.162452	0.331517	0.0594322	0	0	0.00783441	0.0281526	0.569384	0.836138	2.66329	0	0	0	0	0	0	0	0	0	0	0.00765861
[truncated: 8 more columns]

## Sheet: Offshore stations
		64PE449_S1D200	64PE449_S1D270	64PE449_S1D350	64PE449_S1D500	64PE449_S1D1000	64PE449_S1D700	64PE449_S1D1500	64PE449_S2D10	64PE449_S2D50	64PE449_S2D125	64PE449_S2D200	64PE449_S2D250	64PE449_S2D310	64PE449_S2D700	64PE449_S2D715	64PE449_S8D10	64PE449_S8D100	64PE449_S8D175	64PE449_S8D225	64PE449_S8D250	64PE449_S8D300	64PE449_S9D50	64PE449_S9D150	64PE449_S9D300	64PE449_S9D390	64PE450_S55D96	64PE450_S55D115	64PE450_S55D298	64PE450_S55D496
#OTU	#OTU ID	NIOZ169.001.002	NIOZ169.003.004	NIOZ169.005.006	NIOZ169.007.008	NIOZ169.011.012	NIOZ169.009.010	NIOZ169.013.014	NIOZ169.015.016	NIOZ169.017.018	NIOZ169.019.020	NIOZ169.021.022	NIOZ169.023.024	NIOZ169.025.026	NIOZ169.027.028	NIOZ169.029.030	NIOZ169.107.108	NIOZ169.109.110	NIOZ169.111.112	NIOZ169.113.114	NIOZ169.115.116	NIOZ169.117.118	NIOZ169.119.120	NIOZ169.121.122	NIOZ169.123.124	NIOZ169.125.126	NIOZ169.153.154	NIOZ169.155.156	NIOZ169.157.158	NIOZ169.159.160	Taxonomy
1	denovo502183	0	0	0	0	0	0	0	0	0	0	0	0	0	0.000966538	0.00044908	0	0	0	0	0	1.47249e-05	1.01018e-05	0	3.28944e-05	0.000127753	0	0	0	0	D_0__Bacteria; D_1__Planctomycetes; D_2__Brocadiae; D_3__Brocadiales; D_4__Scalinduaceae; D_5__Candidatus Scalindua; *
2	denovo977180	0	0	0	0	0	0	0	0	0	0	0	0	0	0.000202973	0.000193921	0	0	0	0	0	0	5.05091e-05	0	1.09648e-05	1.59691e-05	0	0	0	0	D_0__Bacteria; D_1__Planctomycetes; D_2__Brocadiae; D_3__Brocadiales; D_4__Scalinduaceae; D_5__Candidatus Scalindua; D_6__uncultured Planctomycetales bacterium
3	denovo848930	0	0	0	0	0	0	0	0	0	0	0	0	0	4.83269e-05	4.08255e-05	0	0	0	0	0	0	0	0	0	1.59691e-05	0	0	0	0	D_0__Bacteria; D_1__Planctomycetes; D_2__Brocadiae; D_3__Brocadiales; D_4__Scalinduaceae; D_5__Candidatus Scalindua; *
4	denovo341443	1.0416e-05	0	0	0	0	0	0	0	0	0	0	0	0	0.000115985	4.08255e-05	0	0	0	0	0	0	0	0	6.57888e-05	1.59691e-05	0	0	0	0	D_0__Bacteria; D_1__Planctomycetes; D_2__Brocadiae; D_3__Brocadiales; D_4__Scalinduaceae; D_5__Candidatus Scalindua; D_6__uncultured bacterium
5	denovo844844	0	0	0	0	0	0	0	0	0	0	0	0	0	0	0	0	0	0	0	0.000141314	0	0.000262647	0	0	0	0	0	0	0	D_0__Bacteria; D_1__Planctomycetes; D_2__Brocadiae; D_3__Brocadiales; D_4__Scalinduaceae; D_5__Candidatus Scalindua; D_6__uncultured bacterium
6	denovo1271636	0	0	0	0	0	0	0	0	0	0	0	0	0	1.93308e-05	1.02064e-05	0	0	0	0	0	0	0	0	0	0	0	0	0	0	D_0__Bacteria; D_1__Planctomycetes; D_2__Brocadiae; D_3__Brocadiales; D_4__Scalinduaceae; D_5__Candidatus Scalindua; D_6__Candidatus Scalindua sp. enrichment culture clone 15L
7	denovo154358	0	0	0	0	0	0	0	0	0	0	0	0	0	9.66538e-06	0	0	0	0	0	0	0	0	0	0	0	0	0	0	0	D_0__Bacteria; D_1__Planctomycetes; D_2__Brocadiae; D_3__Brocadiales; D_4__Scalinduaceae; D_5__Candidatus Scalindua; *
8	denovo800152	0	0	0	0	0	0	0	0	0	0	0	0	0	9.66538e-06	0	0	0	0	0	0	0	0	0	0	0	0	0	0	0	D_0__Bacteria; D_1__Planctomycetes; D_2__Brocadiae; D_3__Brocadiales; D_4__Scalinduaceae; D_5__Candidatus Scalindua; D_6__uncultured Planctomycetales bacterium
9	denovo388950	0	0	0	0	0	0	0	0	0	0	0	0	0	0	1.02064e-05	0	0	0	0	0	0	0	0	0	0	0	0	0	0	D_0__Bacteria; D_1__Planctomycetes; D_2__Brocadiae; D_3__Brocadiales; D_4__Scalinduaceae; D_5__Candidatus Scalindua; D_6__uncultured Planctomycetales bacterium
10	denovo450919	0	0	0	0	0	0	0	0	0	0	0	0	0	0	0	0	0	0	0	0	0	0	0	0	0	0	0	0	0	D_0__Bacteria; D_1__Planctomycetes; D_2__Brocadiae; D_3__Brocadiales; D_4__Scalinduaceae; D_5__Candidatus Scalindua; *
11	denovo883379	0	0	0	0	0	0	0	0	0	0	0	0	0	0	0	0	0	0	0	0	0	0	0	0	0	0	0	0	0	D_0__Bacteria; D_1__Planctomycetes; D_2__Brocadiae; D_3__Brocadiales; D_4__Scalinduaceae; D_5__Candidatus Scalindua; D_6__uncultured Planctomycetales bacterium
12	denovo54047	0	0	0	0	0	0	0	0	0	0	0	0	0	0	0	0	0	0	0	0	0	0	0	0	0	0	0	0	0	D_0__Bacteria; D_1__Planctomycetes; D_2__Brocadiae; D_3__Brocadiales; D_4__Scalinduaceae; D_5__Candidatus Scalindua; *
13	denovo981606	0	0	0	0	0	0	0	0	0	0	0	0	0	0	0	0	0	0	0	0	0	0	0	0	0	0	0	0	0	D_0__Bacteria; D_1__Planctomycetes; D_2__Brocadiae; D_3__Brocadiales; D_4__Scalinduaceae; D_5__Candidatus Scalindua; D_6__Candidatus Scalindua brodae
14	denovo1413227	0	0	0	0	0	0	0	0	0	0	0	0	0	0	0	0	0	0	0	0	0	0	0	0	0	0	0	0	0	D_0__Bacteria; D_1__Planctomycetes; D_2__Brocadiae; D_3__Brocadiales; D_4__Scalinduaceae; D_5__Candidatus Scalindua; *
15	denovo657011	0	0	0	0	0	0	0	0	0	0	0	0	0	0	0	0	0	0	0	0	0	0	0	0	0	0	0	0	0	D_0__Bacteria; D_1__Planctomycetes; D_2__Brocadiae; D_3__Brocadiales; D_4__Scalinduaceae; D_5__Candidatus Scalindua; *
16	denovo73632	0	0	0	0	0	0	0	0	0	0	0	0	0	0	0	0	0	0	0	0	0	0	0	0	0	0	0	0	0	D_0__Bacteria; D_1__Planctomycetes; D_2__Brocadiae; D_3__Brocadiales; D_4__Scalinduaceae; D_5__Candidatus Scalindua; D_6__uncultured Planctomycetales bacterium
17	denovo1280850	0	0	0	0	0	0	0	0	0	0	0	0	0	9.66538e-06	1.02064e-05	0	0	0	0	0	0	0	0	0	0	0	0	0	0	D_0__Bacteria; D_1__Planctomycetes; D_2__Brocadiae; D_3__Brocadiales; D_4__Scalinduaceae; D_5__Candidatus Scalindua; *
18	denovo144604	0	0	0	0	0	0	0	0	0	0	0	0	0	0	0	0	0	0	0	0	0	0	0	1.09648e-05	0	0	0	0	0	D_0__Bacteria; D_1__Planctomycetes; D_2__Brocadiae; D_3__Brocadiales; D_4__Scalinduaceae; D_5__Candidatus Scalindua; D_6__uncultured Planctomycetales bacterium
19	denovo266109	0	0	0	0	0	0	0	0	0	0	0	0	0	0	0	0	0	0	0	0	0	5.05091e-05	0	0	0	0	0	0	0	D_0__Bacteria; D_1__Planctomycetes; D_2__Brocadiae; D_3__Brocadiales; D_4__Scalinduaceae; D_5__Candidatus Scalindua; *
20	denovo803687	0	0	0	0	0	0	0	0	0	0	0	0	0	0	0	0	0	0	0	0	0	0	0	0	0	0	0	0	0	D_0__Bacteria; D_1__Planctomycetes; D_2__Brocadiae; D_3__Brocadiales; D_4__Scalinduaceae; D_5__Candidatus Scalindua; *
21	denovo821938	0	0	0	0	0	0	0	0	0	0	0	0	0	0	0	0	0	0	0	0	0	0	0	0	0	0	0	0	0	D_0__Bacteria; D_1__Planctomycetes; D_2__Brocadiae; D_3__Brocadiales; D_4__Scalinduaceae; D_5__Candidatus Scalindua; *
22	denovo823486	0	0	0	0	0	0	0	0	0	0	0	0	0	9.66538e-06	0	0	0	0	0	0	0	0	0	0	0	0	0	0	0	D_0__Bacteria; D_1__Planctomycetes; D_2__Brocadiae; D_3__Brocadiales; D_4__Scalinduaceae; D_5__Candidatus Scalindua; D_6__uncultured Planctomycetales bacterium
23	denovo1044949	0	0	0	0	0	0	0	0	0	0	0	0	0	0	0	0	0	0	0	0	0	0	0	0	0	0	0	0	0	D_0__Bacteria; D_1__Planctomycetes; D_2__Brocadiae; D_3__Brocadiales; D_4__Scalinduaceae; D_5__Candidatus Scalindua; D_6__uncultured Planctomycetales bacterium
24	denovo1197486	0	0	0	0	0	0	0	0	0	0	0	0	0	0	0	0	0	0	0	0	0	0	0	0	0	0	0	0	0	D_0__Bacteria; D_1__Planctomycetes; D_2__Brocadiae; D_3__Brocadiales; D_4__Scalinduaceae; D_5__Candidatus Scalindua; D_6__uncultured Planctomycetales bacterium
25	denovo1333444	0	0	0	0	0	0	0	0	0	0	0	0	0	0	0	0	0	0	0	0	0	0	0	0	0	0	0	0	0	D_0__Bacteria; D_1__Planctomycetes; D_2__Brocadiae; D_3__Brocadiales; D_4__Scalinduaceae; D_5__Candidatus Scalindua; D_6__Candidatus Scalindua sp. enrichment culture clone 15L
26	denovo1407127	0	0	0	0	0	0	0	0	0	0	0	0	0	0	0	0	0	0	0	0	0	0	0	0	0	0	0	0	0	D_0__Bacteria; D_1__Planctomycetes; D_2__Brocadiae; D_3__Brocadiales; D_4__Scalinduaceae; D_5__Candidatus Scalindua; D_6__uncultured planctomycete
27	denovo705496	0	0	0	0	0	0	0	0	0	0	0	0	0	0	0	0	0	0	0	0	0	0	0	0	0	0	0	0	0	D_0__Bacteria; D_1__Planctomycetes; D_2__Brocadiae; D_3__Brocadiales; D_4__Scalinduaceae; D_5__Candidatus Scalindua; *
28	denovo1001520	0	0	0	0	0	0	0	0	0	0	0	0	0	0	0	0	0	0	0	0	0	0	0	0	0	0	0	0	0	D_0__Bacteria; D_1__Planctomycetes; D_2__Brocadiae; D_3__Brocadiales; D_4__Scalinduaceae; D_5__Candidatus Scalindua; *
29	denovo1142426	0	0	0	0	0	0	0	0	0	0	0	0	0	0	0	0	0	0	0	0	0	0	0	0	0	0	0	0	0	D_0__Bacteria; D_1__Planctomycetes; D_2__Brocadiae; D_3__Brocadiales; D_4__Scalinduaceae; D_5__Candidatus Scalindua; D_6__Candidatus Scalindua brodae
30	denovo1273583	0	0	0	0	0	0	0	0	0	0	0	0	0	0	0	0	0	0	0	0	0	0	0	0	0	0	0	0	0	D_0__Bacteria; D_1__Planctomycetes; D_2__Brocadiae; D_3__Brocadiales; D_4__Scalinduaceae; D_5__Candidatus Scalindua; D_6__uncultured Planctomycetales bacterium
31	denovo1328437	0	0	0	0	0	0	0	0	0	0	0	0	0	0	0	0	0	0	0	0	0	0	0	0	0	0	0	0	0	D_0__Bacteria; D_1__Planctomycetes; D_2__Brocadiae; D_3__Brocadiales; D_4__Scalinduaceae; D_5__Candidatus Scalindua; D_6__uncultured Planctomycetales bacterium
32	denovo1335239	0	0	0	0	0	0	0	0	0	0	0	0	0	0	0	0	0	0	0	0	0	0	0	0	0	0	0	0	0	D_0__Bacteria; D_1__Planctomycetes; D_2__Brocadiae; D_3__Brocadiales; D_4__Scalinduaceae; D_5__Candidatus Scalindua; D_6__uncultured bacterium
33	denovo1347810	0	0	0	0	0	0	0	0	0	0	0	0	0	1.93308e-05	0	0	0	0	0	0	0	0	0	0	0	0	0	0	0	D_0__Bacteria; D_1__Planctomycetes; D_2__Brocadiae; D_3__Brocadiales; D_4__Scalinduaceae; D_5__Candidatus Scalindua; D_6__uncultured bacterium
34	denovo1364089	0	0	0	0	0	0	0	0	0	0	0	0	0	0	2.04127e-05	0	0	0	0	0	0	0	0	0	0	0	0	0	0	D_0__Bacteria; D_1__Planctomycetes; D_2__Brocadiae; D_3__Brocadiales; D_4__Scalinduaceae; D_5__Candidatus Scalindua; D_6__uncultured Planctomycetales bacterium
35	denovo177727	0	0	0	0	0	0	0	0	0	0	0	0	0	0	1.02064e-05	0	0	0	0	0	0	0	0	0	0	0	0	0	0	D_0__Bacteria; D_1__Planctomycetes; D_2__Brocadiae; D_3__Brocadiales; D_4__Scalinduaceae; D_5__Candidatus Scalindua; *
36	denovo234017	0	0	0	0	0	0	0	0	0	0	0	0	0	0	0	0	0	0	0	0	0	0	0	0	0	0	0	0	0	D_0__Bacteria; D_1__Planctomycetes; D_2__Brocadiae; D_3__Brocadiales; D_4__Scalinduaceae; D_5__Candidatus Scalindua; D_6__uncultured Planctomycetales bacterium
37	denovo236359	0	0	0	0	0	0	0	0	0	0	0	0	0	0	0	0	0	0	0	0	0	0	0	0	0	0	0	0	0	D_0__Bacteria; D_1__Planctomycetes; D_2__Brocadiae; D_3__Brocadiales; D_4__Scalinduaceae; D_5__Candidatus Scalindua; D_6__Candidatus Scalindua brodae
38	denovo489736	0	0	0	0	0	0	0	0	0	0	0	0	0	0	0	0	0	0	0	0	0	0	0	0	0	0	0	0	0	D_0__Bacteria; D_1__Planctomycetes; D_2__Brocadiae; D_3__Brocadiales; D_4__Scalinduaceae; D_5__Candidatus Scalindua; D_6__uncultured bacterium
39	denovo657259	0	0	0	0	0	0	0	0	0	0	0	0	0	0	0	0	0	0	0	0	0	0	0	0	0	0	0	0	0	D_0__Bacteria; D_1__Planctomycetes; D_2__Brocadiae; D_3__Brocadiales; D_4__Scalinduaceae; D_5__Candidatus Scalindua; *
40	denovo97957	0	0	0	0	0	0	0	0	0	0	0	0	0	0	0	0	0	0	0	0	0	0	0	0	0	0	0	0	0	D_0__Bacteria; D_1__Planctomycetes; D_2__Brocadiae; D_3__Brocadiales; D_4__Scalinduaceae; D_5__Candidatus Scalindua; D_6__uncultured Planctomycetales bacterium
41	denovo1072759	0	0	0	0	0	0	0	0	0	0	0	0	0	0	0	0	0	0	0	0	0	0	0	0	0	0	0	0	0	D_0__Bacteria; D_1__Planctomycetes; D_2__Brocadiae; D_3__Brocadiales; D_4__Scalinduaceae; D_5__Candidatus Scalindua; D_6__uncultured bacterium
42	denovo108689	0	0	0	0	0	0	0	0	0	0	0	0	0	0	0	0	0	0	0	0	0	0	0	0	0	0	0	0	0	D_0__Bacteria; D_1__Planctomycetes; D_2__Brocadiae; D_3__Brocadiales; D_4__Scalinduaceae; D_5__Candidatus Scalindua; D_6__uncultured Planctomycetales bacterium
43	denovo1096988	0	0	0	0	0	0	0	0	0	0	0	0	0	0	0	0	0	0	0	0	0	0	0	0	0	0	0	0	0	D_0__Bacteria; D_1__Planctomycetes; D_2__Brocadiae; D_3__Brocadiales; D_4__Scalinduaceae; D_5__Candidatus Scalindua; *
44	denovo1109115	0	0	0	0	0	0	0	0	0	0	0	0	0	0	0	0	0	0	0	0	0	0	0	0	0	0	0	0	0	D_0__Bacteria; D_1__Planctomycetes; D_2__Brocadiae; D_3__Brocadiales; D_4__Scalinduaceae; D_5__Candidatus Scalindua; D_6__uncultured Planctomycetales bacterium
45	denovo117950	0	0	0	0	0	0	0	0	0	0	0	0	0	0	0	0	0	0	0	0	0	2.02037e-05	0	0	0	0	0	0	0	D_0__Bacteria; D_1__Planctomycetes; D_2__Brocadiae; D_3__Brocadiales; D_4__Scalinduaceae; D_5__Candidatus Scalindua; *
46	denovo1181650	0	0	0	0	0	0	0	0	0	0	0	0	0	0	0	0	0	0	0	0	0	0	0	0	0	0	0	0	0	D_0__Bacteria; D_1__Planctomycetes; D_2__Brocadiae; D_3__Brocadiales; D_4__Scalinduaceae; D_5__Candidatus Scalindua; *
47	denovo1215228	0	0	0	0	0	0	0	0	0	0	0	0	0	0	0	0	0	0	0	0	0	0	0	0	0	0	0	0	0	D_0__Bacteria; D_1__Planctomycetes; D_2__Brocadiae; D_3__Brocadiales; D_4__Scalinduaceae; D_5__Candidatus Scalindua; D_6__uncultured Planctomycetales bacterium
48	denovo1222716	0	0	0	0	0	0	0	0	0	0	0	0	0	0	0	0	0	0	0	0	0	0	0	0	0	0	0	0	0	D_0__Bacteria; D_1__Planctomycetes; D_2__Brocadiae; D_3__Brocadiales; D_4__Scalinduaceae; D_5__Candidatus Scalindua; D_6__uncultured planctomycete
49	denovo123659	1.0416e-05	0	0	0	0	0	0	0	0	0	0	0	0	0	0	0	0	0	0	0	0	0	0	0	0	0	0	0	0	D_0__Bacteria; D_1__Planctomycetes; D_2__Brocadiae; D_3__Brocadiales; D_4__Scalinduaceae; D_5__Candidatus Scalindua; *
50	denovo1351344	0	0	0	0	0	0	0	0	0	0	0	0	0	0	0	0	0	0	0	0	0	0	0	0	0	0	0	0	0	D_0__Bacteria; D_1__Planctomycetes; D_2__Brocadiae; D_3__Brocadiales; D_4__Scalinduaceae; D_5__Candidatus Scalindua; *
51	denovo1393462	0	0	0	0	0	0	0	0	0	0	0	0	0	9.66538e-06	0	0	0	0	0	0	0	0	0	0	0	0	0	0	0	D_0__Bacteria; D_1__Planctomycetes; D_2__Brocadiae; D_3__Brocadiales; D_4__Scalinduaceae; D_5__Candidatus Scalindua; D_6__uncultured Planctomycetales bacterium
52	denovo1428431	0	0	0	0	0	0	0	0	0	0	0	0	0	0	0	0	0	0	0	0	0	0	0	0	0	0	0	0	0	D_0__Bacteria; D_1__Planctomycetes; D_2__Brocadiae; D_3__Brocadiales; D_4__Scalinduaceae; D_5__Candidatus Scalindua; D_6__uncultured Planctomycetales bacterium
53	denovo1451165	0	0	0	0	0	0	0	0	0	0	0	0	0	0	0	0	0	0	0	0	0	0	0	0	0	0	0	0	0	D_0__Bacteria; D_1__Planctomycetes; D_2__Brocadiae; D_3__Brocadiales; D_4__Scalinduaceae; D_5__Candidatus Scalindua; *
54	denovo1460593	0	0	0	0	0	0	0	0	0	0	0	0	0	0	0	0	0	0	0	0	0	0	0	0	0	0	0	0	0	D_0__Bacteria; D_1__Planctomycetes; D_2__Brocadiae; D_3__Brocadiales; D_4__Scalinduaceae; D_5__Candidatus Scalindua; *
55	denovo203437	0	0	0	0	0	0	0	0	0	0	0	0	0	9.66538e-06	0	0	0	0	0	0	0	0	0	0	0	0	0	0	0	D_0__Bacteria; D_1__Planctomycetes; D_2__Brocadiae; D_3__Brocadiales; D_4__Scalinduaceae; D_5__Candidatus Scalindua; *
56	denovo287398	0	0	0	0	0	0	0	0	0	0	0	0	0	0	0	0	0	0	0	0	0	0	0	0	0	0	0	0	0	D_0__Bacteria; D_1__Planctomycetes; D_2__Brocadiae; D_3__Brocadiales; D_4__Scalinduaceae; D_5__Candidatus Scalindua; *
57	denovo328172	0	0	0	0	0	0	0	0	0	0	0	0	0	0	0	0	0	0	0	0	0	0	0	0	0	0	0	0	0	D_0__Bacteria; D_1__Planctomycetes; D_2__Brocadiae; D_3__Brocadiales; D_4__Scalinduaceae; D_5__Candidatus Scalindua; D_6__uncultured Planctomycetales bacterium
58	denovo357009	0	0	0	0	0	0	0	0	0	0	0	0	0	0	0	0	0	0	0	0	0	0	0	0	0	0	0	0	0	D_0__Bacteria; D_1__Planctomycetes; D_2__Brocadiae; D_3__Brocadiales; D_4__Scalinduaceae; D_5__Candidatus Scalindua; D_6__uncultured Planctomycetales bacterium
59	denovo564247	0	0	0	0	0	0	0	0	0	0	0	0	0	9.66538e-06	0	0	0	0	0	0	0	0	0	0	0	0	0	0	0	D_0__Bacteria; D_1__Planctomycetes; D_2__Brocadiae; D_3__Brocadiales; D_4__Scalinduaceae; D_5__Candidatus Scalindua; D_6__uncultured Planctomycetales bacterium
60	denovo724135	0	0	0	0	0	0	0	0	0	0	0	0	0	0	0	0	0	0	0	0	0	0	0	0	0	0	0	0	0	D_0__Bacteria; D_1__Planctomycetes; D_2__Brocadiae; D_3__Brocadiales; D_4__Scalinduaceae; D_5__Candidatus Scalindua; D_6__uncultured Planctomycetales bacterium
61	denovo731807	0	0	0	0	0	0	0	0	0	0	0	0	0	0	0	0	0	0	0	0	0	0	0	0	0	0	0	0	0	D_0__Bacteria; D_1__Planctomycetes; D_2__Brocadiae; D_3__Brocadiales; D_4__Scalinduaceae; D_5__Candidatus Scalindua; D_6__uncultured bacterium
62	denovo804484	0	0	0	0	0	0	0	0	0	0	0	0	0	0	0	0	0	0	0	0	0	0	0	0	0	0	0	0	0	D_0__Bacteria; D_1__Planctomycetes; D_2__Brocadiae; D_3__Brocadiales; D_4__Scalinduaceae; D_5__Candidatus Scalindua; *
63	denovo873744	0	0	0	0	0	0	0	0	0	0	0	0	0	0	0	0	0	0	0	0	0	0	0	0	0	0	0	0	0	D_0__Bacteria; D_1__Planctomycetes; D_2__Brocadiae; D_3__Brocadiales; D_4__Scalinduaceae; D_5__Candidatus Scalindua; D_6__uncultured Planctomycetales bacterium
64	denovo923256	0	0	0	0	0	0	0	0	0	0	0	0	0	9.66538e-06	0	0	0	0	0	0	0	0	0	0	0	0	0	0	0	D_0__Bacteria; D_1__Planctomycetes; D_2__Brocadiae; D_3__Brocadiales; D_4__Scalinduaceae; D_5__Candidatus Scalindua; *
65	denovo938878	0	0	0	0	0	0	0	0	0	0	0	0	0	0	0	0	0	0	0	0	0	0	0	0	0	0	0	0	0	D_0__Bacteria; D_1__Planctomycetes; D_2__Brocadiae; D_3__Brocadiales; D_4__Scalinduaceae; D_5__Candidatus Scalindua; D_6__uncultured Candidatus Scalindua sp.
66	denovo954186	0	0	0	0	0	0	0	0	0	0	0	0	0	0	0	0	0	0	0	0	0	0	0	0	0	0	0	0	0	D_0__Bacteria; D_1__Planctomycetes; D_2__Brocadiae; D_3__Brocadiales; D_4__Scalinduaceae; D_5__Candidatus Scalindua; *
Total # of bacterial reads in sample		96006	89802	88191	92502	58175	87287	77599	124189	101420	75388	64842	85934	99551	103462	97978	169848	82489	83411	96195	77841	67912	98992	97538	91201	62621	236275	89576	61430	9646
Total # of Scalindua reads in sample		2	0	0	0	0	0	0	0	0	0	0	0	0	150	77	0	0	0	0	11	1	39	0	11	11	0	0	0	0
Relative abundance Scalindua in sample (permille)		0.020832	0	0	0	0	0	0	0	0	0	0	0	0	1.44981	0.785891	0	0	0	0	0.141314	0.0147249	0.393971	0	0.120613	0.17566	0	0	0	0
