# Supplementary material for: Bacteriohopanetetrol-x: constraining its application as a lipid biomarker for marine anammox using the water column oxygen gradient of the Benguela upwelling system
Source: Copernicus journal article supplement (doi:10.5194/bg-2021-257), 2021-10-05
Supplement: Supplementary file 7 [file Table_S7.xlsx]

## Sheet: All sequences
	OTU-6	OTU-7	OTU-4	OTU-9	OTU-10	OTU-1	OTU-12	OTU-8	OTU-3	OTU-5	OTU-11	OTU-2	Ca._Brocadia_sapporoensis_(AM285341)	Indian_Ocean_sediment_(MG596621)	Central_Pacific_Ocean_OMZ_386_db_(LC332492)	Kings_Bay_Svalbard_sediment_(EU050867)	Ca._Scalindua_wagneri_(EU478692)	Ca._Scalindua_marina_(EF602039)	Golf_of_Mexico_sediments_(KX172942)	Namibian_OMZ_52m_(EU478632)	Ca._Scalindua_sorokinii_(AY257181)	Ca._Jettenia_asiatica_(DQ301513)	Ca._Scalindua_brodae_(AY254883)	Peruvian_OMZ_35m_(EU478677)	Black_Sea_suboxic_waters_100m_(EU478626)	Guaymas_deep_sea_hydrothermal_vent_sediment_(HM851557)	Japan_Yodo_River_sediment_(AB300486)	Alaskan_margin_sediment_(DQ869384)	Ca._Kuenenia_stuttgartiensis_(AF375995)	Arabian_Sea_OMZ_221m_(EU478614)	Planctomyces_maris_(AJ231184)	Isosphaera_pallida_(AJ231195)	South_China_Sea_sediment_(HQ665763)	China_coastal_wetland_sediment_(JQ886206)	Yellow_Sea_continental_shelf_sediment_(GQ143786)	Ca.Scalindua_marina_Yangtze_Estuary_sediment_(JX243727)	Black_Sea_suboxic_waters_53m_(DQ368148)	Golfo_Dulce_OMZ_150m_(DQ386152)	Antarctica_continental_shelf_sediment_(AF424477)
OTU-6
OTU-7	0.0665918
OTU-4	0.0391685	0.062266
OTU-9	0.0627871	0.0589557	0.0584612
OTU-10	0.176873	0.17301	0.172547	0.169237
OTU-1	0.0468431	0.0197488	0.0425172	0.039207	0.153261
OTU-12	0.0545495	0.0507181	0.0502236	0.0362502	0.160999	0.0309694
OTU-8	0.0595238	0.0556608	0.055198	0.0518877	0.147457	0.0359121	0.0436501
OTU-3	0.0728094	0.0369559	0.0684835	0.0651732	0.179227	0.0259663	0.0569357	0.0618784
OTU-5	0.0827435	0.105841	0.063985	0.102036	0.216122	0.0860922	0.0937986	0.098773	0.112059
OTU-11	0.0961732	0.0923102	0.0918474	0.0885371	0.115328	0.0725614	0.0802995	0.0667575	0.0985277	0.135422
OTU-2	0.0386675	0.027956	0.0343416	0.0310314	0.145085	0.00820728	0.0227938	0.0277365	0.0341736	0.0779166	0.0643858
Ca._Brocadia_sapporoensis_(AM285341)	0.148633	0.171731	0.129875	0.167926	0.282012	0.151982	0.159688	0.164663	0.177948	0.13165	0.201312	0.143806
Indian_Ocean_sediment_(MG596621)	0.0643515	0.087449	0.0455931	0.0836443	0.19773	0.0677003	0.0754067	0.080381	0.0936666	0.0342319	0.11703	0.0595247	0.113258
Central_Pacific_Ocean_OMZ_386_db_(LC332492)	0.0725921	0.056102	0.0682663	0.064956	0.17901	0.0363532	0.0567184	0.0616611	0.0623195	0.111841	0.0983105	0.0339563	0.177731	0.0934493
Kings_Bay_Svalbard_sediment_(EU050867)	0.0707376	0.0938351	0.0519792	0.0900304	0.204116	0.0740864	0.0817928	0.0867671	0.100053	0.0654579	0.123417	0.0659108	0.131348	0.047066	0.0998354
Ca._Scalindua_wagneri_(EU478692)	0.0951707	0.118268	0.0764122	0.114463	0.228549	0.0985194	0.106226	0.1112	0.124486	0.0781872	0.14785	0.0903438	0.116581	0.0597952	0.124268	0.0778851
Ca._Scalindua_marina_(EF602039)	0.0677501	0.0908476	0.0489916	0.0870428	0.201129	0.0710988	0.0788052	0.0837796	0.0970651	0.0624703	0.120429	0.0629232	0.12836	0.0440784	0.0968478	0.0348519	0.0748975
Golf_of_Mexico_sediments_(KX172942)	0.0741867	0.0972842	0.0554282	0.0934794	0.207565	0.0775354	0.0852418	0.0902162	0.103502	0.018947	0.126866	0.0693598	0.123093	0.0256751	0.103284	0.0569011	0.0696304	0.0539135
Namibian_OMZ_52m_(EU478632)	0.0625069	0.0856044	0.0437484	0.0817996	0.195885	0.0658556	0.073562	0.0785364	0.0918219	0.0572272	0.115186	0.05768	0.123117	0.0388352	0.0916047	0.0296087	0.0696544	0.0213324	0.0486704
Ca._Scalindua_sorokinii_(AY257181)	0.0713444	0.0548543	0.0670186	0.0637083	0.177762	0.0351055	0.0554707	0.0604134	0.0610718	0.110594	0.0970628	0.0327086	0.176483	0.0922016	0.0399427	0.0985877	0.123021	0.0956002	0.102037	0.090357
Ca._Jettenia_asiatica_(DQ301513)	0.189783	0.21288	0.171024	0.209076	0.323161	0.193132	0.200838	0.205812	0.219098	0.172799	0.242462	0.184956	0.07614	0.154407	0.218881	0.172497	0.157731	0.16951	0.164242	0.164266	0.217633
Ca._Scalindua_brodae_(AY254883)	0.0624332	0.0855307	0.0436748	0.0817259	0.195812	0.065782	0.0734884	0.0784627	0.0917482	0.0571535	0.115112	0.0576063	0.123043	0.0387615	0.091531	0.029535	0.0695807	0.0159341	0.0485967	0.0160155	0.0902833	0.164193
Peruvian_OMZ_35m_(EU478677)	0.0651238	0.0882213	0.0463654	0.0844166	0.198502	0.0684726	0.076179	0.0811533	0.0944389	0.0598441	0.117803	0.060297	0.125734	0.0414522	0.0942216	0.0322256	0.0722713	0.0186247	0.0512873	0.0187061	0.0929739	0.166883	0.00798179
Black_Sea_suboxic_waters_100m_(EU478626)	0.054459	0.0775565	0.0357005	0.0737517	0.187837	0.0578077	0.0655141	0.0704885	0.083774	0.0491792	0.107138	0.0496321	0.115069	0.0307873	0.0835568	0.0215608	0.0616065	0.0185732	0.0406225	0.0133301	0.0823091	0.156219	0.0132564	0.015947
Guaymas_deep_sea_hydrothermal_vent_sediment_(HM851557)	0.0519969	0.0355068	0.0476711	0.0443608	0.158415	0.015758	0.0361232	0.0410659	0.0417243	0.091246	0.0777153	0.0133611	0.157136	0.0728541	0.0205952	0.0792402	0.103673	0.0762526	0.0826892	0.0710095	0.0193475	0.198285	0.0709358	0.0736264	0.0629616
Japan_Yodo_River_sediment_(AB300486)	0.096135	0.119232	0.0773765	0.115428	0.229513	0.0994837	0.10719	0.112164	0.12545	0.0791515	0.148814	0.0913081	0.117545	0.0607595	0.125233	0.0788494	0.00817722	0.0758618	0.0705947	0.0706187	0.123985	0.158695	0.070545	0.0732356	0.0625708	0.104638
Alaskan_margin_sediment_(DQ869384)	0.05711	0.0802076	0.0383516	0.0764028	0.190489	0.0604588	0.0681652	0.0731396	0.0864251	0.0518303	0.109789	0.0522832	0.11772	0.0334384	0.0862078	0.0242118	0.0642575	0.0212243	0.0432735	0.0159811	0.0849601	0.15887	0.0159074	0.018598	0.0079332	0.0656126	0.0652218
Ca._Kuenenia_stuttgartiensis_(AF375995)	0.163368	0.186466	0.14461	0.182661	0.296747	0.166717	0.174424	0.179398	0.192683	0.146385	0.216047	0.158542	0.0497256	0.127993	0.192466	0.146083	0.131316	0.143095	0.137828	0.137852	0.191219	0.0715815	0.137778	0.140469	0.129804	0.171871	0.132281	0.132455
Arabian_Sea_OMZ_221m_(EU478614)	0.0842809	0.107378	0.0655224	0.103574	0.217659	0.0876296	0.095336	0.10031	0.113596	0.0790012	0.13696	0.079454	0.144891	0.0606092	0.113379	0.0513827	0.0914284	0.0324872	0.0704444	0.0378632	0.112131	0.18604	0.0324649	0.0351555	0.035104	0.0927835	0.0923927	0.0377551	0.159626
Planctomyces_maris_(AJ231184)	0.592237	0.615335	0.573479	0.61153	0.725616	0.595586	0.603292	0.608267	0.621552	0.575254	0.644916	0.58741	0.448219	0.556862	0.621335	0.574952	0.560185	0.571964	0.566697	0.566721	0.620087	0.519744	0.566647	0.569338	0.558673	0.60074	0.561149	0.561324	0.49333	0.588495
Isosphaera_pallida_(AJ231195)	0.640853	0.663951	0.622095	0.660146	0.774232	0.644202	0.651908	0.656883	0.670168	0.62387	0.693532	0.636026	0.496835	0.605478	0.669951	0.623568	0.608801	0.62058	0.615313	0.615337	0.668703	0.56836	0.615263	0.617954	0.607289	0.649356	0.609765	0.60994	0.541946	0.637111	0.388498
South_China_Sea_sediment_(HQ665763)	0.0855423	0.10864	0.0667838	0.104835	0.218921	0.088891	0.0965974	0.101572	0.114857	0.0802626	0.138221	0.0807154	0.146152	0.0618706	0.11464	0.0526441	0.0926898	0.0337486	0.0717058	0.0391246	0.113392	0.187302	0.0337263	0.0364169	0.0363654	0.0940449	0.0936541	0.0390165	0.160888	0.0133308	0.589756	0.638372
China_coastal_wetland_sediment_(JQ886206)	0.0582458	0.0813433	0.0394873	0.0775385	0.191624	0.0615945	0.0693009	0.0742753	0.0875608	0.0529661	0.110925	0.0534189	0.118856	0.0345741	0.0873436	0.0409602	0.0653933	0.0379727	0.0444093	0.0327295	0.0860959	0.160005	0.0326558	0.0353464	0.0246816	0.0667484	0.0663576	0.0273326	0.133591	0.0545035	0.56246	0.611076	0.0557649
Yellow_Sea_continental_shelf_sediment_(GQ143786)	0.0467984	0.0698959	0.02804	0.0660912	0.180177	0.0501472	0.0578536	0.0628279	0.0761135	0.0415187	0.0994773	0.0419716	0.107408	0.0231268	0.0758962	0.0295129	0.0539459	0.0265253	0.0329619	0.0212821	0.0746485	0.148558	0.0212084	0.0238991	0.0132342	0.055301	0.0549102	0.0158853	0.122144	0.0430561	0.551013	0.599628	0.0443175	0.017021
Ca.Scalindua_marina_Yangtze_Estuary_sediment_(JX243727)	0.0586604	0.0817579	0.0399019	0.0779531	0.192039	0.0620091	0.0697155	0.0746899	0.0879754	0.0533806	0.111339	0.0538335	0.11927	0.0349887	0.0877581	0.0413748	0.0658078	0.0383872	0.0448238	0.0331441	0.0865104	0.16042	0.0330704	0.035761	0.0250961	0.0671629	0.0667721	0.0277472	0.134006	0.054918	0.562874	0.61149	0.0561795	0.00703408	0.0174356
Black_Sea_suboxic_waters_53m_(DQ368148)	0.0617226	0.0452325	0.0573968	0.0540865	0.168141	0.0254837	0.0458489	0.0507916	0.05145	0.100972	0.087441	0.0230868	0.166862	0.0825798	0.0303209	0.0889659	0.113399	0.0859783	0.092415	0.0807352	0.00962181	0.208011	0.0806615	0.0833521	0.0726873	0.00972571	0.114363	0.0753383	0.181597	0.102509	0.610466	0.659081	0.103771	0.0764741	0.0650267	0.0768886
Golfo_Dulce_OMZ_150m_(DQ386152)	0.0764469	0.0599568	0.0721211	0.0688108	0.182865	0.0402081	0.0605732	0.0655159	0.0661743	0.115696	0.102165	0.0378111	0.181586	0.0973041	0.0450452	0.10369	0.128123	0.100703	0.107139	0.0954595	0.0243461	0.222735	0.0953858	0.0980764	0.0874116	0.02445	0.129088	0.0900626	0.196321	0.117233	0.62519	0.673806	0.118495	0.0911984	0.079751	0.091613	0.0147243
Antarctica_continental_shelf_sediment_(AF424477)	0.0650777	0.0881752	0.0463192	0.0843704	0.198456	0.0684264	0.0761328	0.0811072	0.0943927	0.059798	0.117757	0.0602508	0.125688	0.041406	0.0941755	0.0321795	0.0722252	0.013284	0.0512412	0.01866	0.0929278	0.166837	0.0132617	0.0159523	0.0159008	0.0735803	0.0731895	0.0185519	0.140423	0.0298148	0.569292	0.617908	0.0310762	0.0353003	0.0238529	0.0357148	0.083306	0.0980303
											0.0735803

## Sheet: BUS cluster Grouped
	BUS_OMZ_cluster	OTU-10	OTU-5	Brocadia	Indian_ocean	Central_Pacific	Kings_Bay	Scalindua_wagneri	Scalindua_marina	Golf_of_mexico	Namibia_52_m	Scalindua_sorokiini	Jettenia_asiatica	Scalindua_brodae	Peru_35m	Black_sea_100m	Guaymas	Japan_Yodo_river	Alaska	Kuenenia	Arabian_Sea_221m	Planctomyces_maris	Isosphaera_pallida	South_china_sea	China_coastal_wetland	Yellow_Sea	Scalindua_Marina_Yangtze	Black_Sea_53m	Golfo_Dulce	Antarctica
BUS_OMZ_cluster
OTU-10	0.110973
OTU-5	0.0599445	0.145014
Brocadia	0.108143	0.195681	0.100343
Indian_ocean	0.049574	0.0787026	0.0282274	0.0857314
Central_Pacific	0.0334026	0.0268079	0.0660008	0.107702	0.0479234
Kings_Bay	0.0524868	0.142048	0.061165	0.0943683	0.0445223	0.0443166
Scalindua_wagneri	0.071626	0.164779	0.0668318	0.0890834	0.0617491	0.0662311	0.05598
Scalindua_marina	0.0403722	0.126601	0.0585504	0.0887285	0.0446133	0.0268079	0.0323177	0.0533791
Golf_of_mexico	0.0680599	0.161004	0.0171723	0.0859855	0.0250553	0.0624555	0.0531424	0.0587	0.0505568
Namibia_52_m	0.0396678	0.12989	0.0532437	0.080313	0.0413718	0.0303938	0.0272424	0.0534926	0.0196832	0.0453213
Scalindua_sorokiini	0.0478698	0.129181	0.0774012	0.117632	0.041407	0.0234412	0.0557198	0.0777113	0.042534	0.0747098	0.0425791
Jettenia_asiatica	0.139796	0.217355	0.121352	0.061754	0.111965	0.137539	0.121157	0.112391	0.121352	0.118483	0.106385	0.152051
Scalindua_brodae	0.033924	0.114294	0.0532437	0.080313	0.0347484	0.0200159	0.0221597	0.0481044	0.0146763	0.0453213	0.0147141	0.0372803	0.112391
Peru_35m	0.0359941	0.120327	0.0559476	0.0888502	0.0447229	0.026906	0.029807	0.0507899	0.0171723	0.0479828	0.0122255	0.0347079	0.121561	0.00727461
Black_sea_100m	0.0361643	0.12626	0.0451576	0.0830371	0.0314175	0.0268079	0.0196101	0.0453477	0.0171378	0.0373725	0.0121951	0.0398316	0.109212	0.0121654	0.0146405
Guaymas	0.0180932	0.0193664	0.0462349	0.0852087	0.0293041	0.0166128	0.0259494	0.053429	0.0095757	0.0428735	0.0128541	0.00638268	0.120355	0.00317663	0.00960336	0.0095757
Japan_Yodo_river	0.0738718	0.167374	0.0667099	0.0892188	0.0581493	0.0660468	0.0585927	0.00729404	0.05598	0.0585927	0.0560904	0.0802109	0.112581	0.0505568	0.0532437	0.0478025	0.0533013
Alaska	0.0392616	0.129341	0.0478025	0.0858733	0.034678	0.0302814	0.0221211	0.048008	0.0196412	0.0399767	0.0146763	0.0424278	0.112215	0.0146405	0.0171303	0.00725344	0.0128139	0.0504641
Kuenenia	0.12529	0.212804	0.100195	0.0428116	0.0891891	0.128084	0.105947	0.103571	0.106102	0.0916027	0.0974098	0.13554	0.0616367	0.0971534	0.105988	0.0941212	0.104077	0.103468	0.0970163
Arabian_Sea_221m	0.0537202	0.1385	0.061165	0.0914844	0.0379638	0.0337836	0.0400479	0.0532773	0.0297452	0.0531424	0.0349835	0.0582658	0.118101	0.0246326	0.0323068	0.0296717	0.0226815	0.0557397	0.0322375	0.0968922
Planctomyces_maris	0.319605	0.352784	0.310071	0.280535	0.326145	0.280961	0.334884	0.318234	0.308914	0.302012	0.300893	0.349972	0.318647	0.308498	0.308498	0.307934	0.291923	0.304767	0.312251	0.312682	0.304202
Isosphaera_pallida	0.326605	0.382633	0.320224	0.288836	0.32486	0.319646	0.320644	0.32494	0.315988	0.316387	0.316387	0.357073	0.293198	0.302907	0.307031	0.314996	0.312766	0.323474	0.319215	0.303189	0.319631	0.240051
South_china_sea	0.0416285	0.0676665	0.0608938	0.0962049	0.0282274	0.0268079	0.0442407	0.0610897	0.0344606	0.0575907	0.0378073	0.0313191	0.122927	0.0248491	0.0345302	0.0312213	0.0160774	0.0609884	0.0344606	0.0997023	0.0122816	0.309106	0.329035
China_coastal_wetland	0.0370849	0.0643304	0.0474849	0.0854492	0.015496	0.0303938	0.0312213	0.0612103	0.0312784	0.0442407	0.0281139	0.0281392	0.111585	0.0217091	0.0313532	0.0185168	0.0128541	0.0610897	0.021671	0.0962049	0.0312784	0.313858	0.333961	0.0185865
Yellow_Sea	0.0419683	0.135789	0.0373725	0.0859855	0.021806	0.0374571	0.0272424	0.0481044	0.0247506	0.0296946	0.019736	0.0477297	0.112391	0.0196875	0.0222147	0.0121654	0.0194324	0.0478869	0.0146405	0.0971534	0.0323068	0.299945	0.307031	0.0345302	0.0154005
Scalindua_Marina_Yangtze	0.0423622	0.071288	0.0474849	0.0890732	0.015496	0.0374571	0.0377251	0.0681637	0.0378073	0.0442407	0.0346176	0.034639	0.115434	0.0281139	0.0379075	0.0248491	0.0194324	0.0645382	0.0280514	0.099907	0.0378073	0.313858	0.323	0.0249669	0.00612377	0.00918566
Black_Sea_53m	0.0207256	0.0226815	0.0497284	0.088964	0.0326858	0.0200159	0.0293041	0.0569937	0.0128139	0.0463527	0.0161304	0.00318371	0.124426	0.00637763	0.00637763	0.0128139	0.00317663	0.0568511	0.0160774	0.107985	0.0260229	0.291923	0.312766	0.0193664	0.0161304	0.0227606	0.0227606
Golfo_Dulce	0.0359743	0.110738	0.0646967	0.101594	0.0515346	0.0338982	0.0413597	0.0559764	0.0271946	0.0618041	0.027251	0.0161276	0.131565	0.0216625	0.0188959	0.0244004	0.0161292	0.0588561	0.0271946	0.12119	0.0386556	0.345688	0.339066	0.0411448	0.0379268	0.0329147	0.0445804	0.0128551
Antarctica	0.0371786	0.1232	0.0558378	0.0830371	0.0412755	0.0233629	0.0297452	0.0453477	0.0121753	0.0478869	0.0171723	0.0398316	0.115239	0.0121654	0.0146405	0.0146135	0.00636238	0.0478025	0.0170959	0.099931	0.0271214	0.295224	0.310815	0.0312213	0.0280514	0.0221546	0.0345302	0.0095757	0.0244004

## Sheet: Within BUS OTUs
	Pairwise distance within group	SD	Caption
All BUS OTUs	0.0563063	0.00643896	1
BUS OTU cluster (excl. OTU-5)	0.054032	0.00665535	2
BUS cluster excl. OTU-10 & 5	0.0413784	0.00541218	3

## Sheet: All sequences-Caption
Pairwise Patristic Distances Between Sequences
Patristic distances between pairs of sequences are shown. Analyses were conducted using the Kimura 2-parameter model [1]. This analysis involved 39 nucleotide sequences. Codon positions included were 1st+2nd+3rd+Noncoding. There were a total of 421 positions in the final dataset. Evolutionary analyses were conducted in MEGA X [2]
1. Kimura M. (1980). A simple method for estimating evolutionary rate of base substitutions through comparative studies of nucleotide sequences. Journal of Molecular Evolution 16:111-120.
2. Kumar S., Stecher G., Li M., Knyaz C., and Tamura K. (2018). MEGA X: Molecular Evolutionary Genetics Analysis across computing platforms. Molecular Biology and Evolution 35:1547-1549.
Disclaimer: Although utmost care has been taken to ensure the correctness of the caption, the caption text is provided "as is" without any warranty of any kind. Authors advise the user to carefully check the caption prior to its use for any purpose and report any errors or problems to the authors immediately (www.megasoftware.net). In no event shall the authors and their employers be liable for a…

## Sheet: BUS cluster with Refs
	BUS_cluster	OTU-5	Brocadia	Indian_ocean	Central_Pacific	Kings_Bay	Scalindua_wagneri	Scalindua_marina	Golf_of_mexico	Namibia_52_m	Scalindua_sorokiini	Jettenia_asiatica	Scalindua_brodae	Peru_35m	Black_sea_100m	Guaymas	Japan_Yodo_river	Alaska	Kuenenia	Arabian_Sea_221m	Planctomyces_maris	Isosphaera_pallida	South_china_sea	China_coastal_wetland	Yellow_Sea	Scalindua_Marina_Yangtze	Black_Sea_53m	Golfo_Dulce	Antarctica
BUS_cluster		0.010618	0.0162191	0.0111547	0.00891992	0.00986169	0.0126583	0.00825318	0.0118998	0.00818684	0.00880733	0.0194139	0.00699378	0.00733404	0.0075097	0.00441683	0.0129138	0.00799443	0.0179833	0.0103123	0.0347418	0.0359455	0.00979072	0.00906692	0.0085844	0.0100496	0.00527191	0.00761312	0.00770213
OTU-5	0.0676781		0.0169387	0.00965667	0.0157463	0.0129294	0.0134694	0.0124853	0.00667491	0.0116099	0.0143499	0.0191729	0.0118722	0.0120889	0.0108015	0.0125605	0.0134243	0.0112006	0.0167813	0.0128497	0.0363025	0.0376234	0.0142131	0.01249	0.00986532	0.0125852	0.0131351	0.0137143	0.0122189
Brocadia	0.116101	0.100343		0.0173288	0.0197496	0.0162597	0.0157911	0.0154207	0.0152688	0.0145542	0.0185909	0.0134248	0.014436	0.0151971	0.0148087	0.0171635	0.0157387	0.0150078	0.0106826	0.0158081	0.0328826	0.0346251	0.0182856	0.0169648	0.0152244	0.0172823	0.0177045	0.0175216	0.0148078
Indian_ocean	0.052222	0.0282274	0.0857314		0.0133537	0.0123642	0.0144826	0.0123616	0.00892457	0.011297	0.0115371	0.0204528	0.0107214	0.012186	0.0100137	0.00984488	0.0140464	0.0106823	0.0176978	0.0114103	0.0420226	0.0426346	0.00978361	0.00697593	0.00800567	0.00670369	0.0105018	0.0131007	0.0116422
Central_Pacific	0.0328031	0.0660008	0.107702	0.0479234		0.0126337	0.0156322	0.00946781	0.015017	0.0105911	0.008966	0.0233844	0.00859292	0.0100636	0.00989029	0.00776254	0.015617	0.0102617	0.0220298	0.0108521	0.0375733	0.0428761	0.0095219	0.0106247	0.011901	0.011901	0.00855909	0.0112713	0.0091191
Kings_Bay	0.0606288	0.061165	0.0943683	0.0445223	0.0443166		0.0120848	0.00886925	0.0118715	0.00794708	0.0117769	0.0188927	0.00733067	0.00860165	0.00687395	0.00905072	0.0124992	0.00721001	0.0176098	0.010008	0.0381284	0.0365906	0.0121	0.0102165	0.0083974	0.0113387	0.00978331	0.0107148	0.00831416
Scalindua_wagneri	0.0800944	0.0668318	0.0890834	0.0617491	0.0662311	0.05598		0.0119091	0.0122847	0.0116546	0.0143637	0.0181968	0.011044	0.0114787	0.0108939	0.0133104	0.00416852	0.0109957	0.0171516	0.011824	0.0366353	0.0378117	0.0141717	0.0142947	0.0112797	0.0153826	0.0139237	0.0125481	0.0107195
Scalindua_marina	0.0482112	0.0585504	0.0887285	0.0446133	0.0268079	0.0323177	0.0533791		0.0113456	0.00717182	0.0106681	0.018768	0.00621649	0.00673984	0.00659136	0.00566557	0.0122553	0.00710197	0.0172885	0.00845223	0.0355596	0.0363127	0.0105029	0.0103372	0.00795652	0.0114181	0.00656597	0.00869276	0.00545455
Golf_of_mexico	0.0765094	0.0171723	0.0859855	0.0250553	0.0624555	0.0531424	0.0587	0.0505568		0.0104963	0.0139637	0.0185426	0.0106629	0.0109681	0.00958756	0.011911	0.0121657	0.0100966	0.0153857	0.0116883	0.0355389	0.0371413	0.013558	0.0119292	0.00852125	0.011904	0.0124461	0.0131123	0.0110614
Namibia_52_m	0.0478698	0.0532437	0.080313	0.0413718	0.0303938	0.0272424	0.0534926	0.0196832	0.0453213		0.0105092	0.0172283	0.00610881	0.00553293	0.00531596	0.00648765	0.0119836	0.00601386	0.0162475	0.00937183	0.0351466	0.0362499	0.0111197	0.00931518	0.00686302	0.0104377	0.00728748	0.00843125	0.006628
Scalindua_sorokiini	0.0552617	0.0774012	0.117632	0.041407	0.0234412	0.0557198	0.0777113	0.042534	0.0747098	0.0425791		0.0217864	0.00978601	0.00945622	0.00991743	0.0044723	0.0146455	0.01024	0.0205476	0.0122935	0.0391804	0.03974	0.00974723	0.00940675	0.0107898	0.0105881	0.00333522	0.00639786	0.0101476
Jettenia_asiatica	0.146847	0.121352	0.061754	0.111965	0.137539	0.121157	0.112391	0.121352	0.118483	0.106385	0.152051		0.0177694	0.0185272	0.0173222	0.0213242	0.0181373	0.0176273	0.0131887	0.0181974	0.0373595	0.0346023	0.021195	0.02014	0.0178703	0.020534	0.0217491	0.0205582	0.0181501
Scalindua_brodae	0.0412304	0.0532437	0.080313	0.0347484	0.0200159	0.0221597	0.0481044	0.0146763	0.0453213	0.0147141	0.0372803	0.112391		0.00425193	0.00560793	0.0034046	0.0114253	0.00603145	0.0163864	0.0079976	0.0353173	0.0353728	0.0089073	0.00835126	0.00722749	0.00970861	0.00466211	0.00775529	0.00551052
Peru_35m	0.0436608	0.0559476	0.0888502	0.0447229	0.026906	0.029807	0.0507899	0.0171723	0.0479828	0.0122255	0.0347079	0.121561	0.00727461		0.00604302	0.00573221	0.0117986	0.00656731	0.0172304	0.00899708	0.0357925	0.0356068	0.0105491	0.0100827	0.00749447	0.0112991	0.00472922	0.00703382	0.00614476
Black_sea_100m	0.0443548	0.0451576	0.0830371	0.0314175	0.0268079	0.0196101	0.0453477	0.0171378	0.0373725	0.0121951	0.0398316	0.109212	0.0121654	0.0146405		0.00554459	0.0112187	0.00418407	0.0160236	0.00849038	0.0355246	0.0363492	0.010002	0.00775142	0.00538253	0.00891525	0.00636405	0.00817188	0.0058985
Guaymas	0.018209	0.0462349	0.0852087	0.0293041	0.0166128	0.0259494	0.053429	0.0095757	0.0428735	0.0128541	0.00638268	0.120355	0.00317663	0.00960336	0.0095757		0.0133779	0.00650198	0.0194054	0.00867654	0.038849	0.0415267	0.00716819	0.00646863	0.00806997	0.00806997	0.00326603	0.00717573	0.00445798
Japan_Yodo_river	0.0823719	0.0667099	0.0892188	0.0581493	0.0660468	0.0585927	0.00729404	0.05598	0.0585927	0.0560904	0.0802109	0.112581	0.0505568	0.0532437	0.0478025	0.0533013		0.0114182	0.0172081	0.0120257	0.0352046	0.0371536	0.0142817	0.0145303	0.0112073	0.0149815	0.0139353	0.0129575	0.0110459
Alaska	0.0474506	0.0478025	0.0858733	0.034678	0.0302814	0.0221211	0.048008	0.0196412	0.0399767	0.0146763	0.0424278	0.112215	0.0146405	0.0171303	0.00725344	0.0128139	0.0504641		0.0163248	0.00894445	0.036144	0.036669	0.0105799	0.00834607	0.00613372	0.00965507	0.0072367	0.00843881	0.00656669
Kuenenia	0.133246	0.100195	0.0428116	0.0891891	0.128084	0.105947	0.103571	0.106102	0.0916027	0.0974098	0.13554	0.0616367	0.0971534	0.105988	0.0941212	0.104077	0.103468	0.0970163		0.0162196	0.0361437	0.0352533	0.0185559	0.0183246	0.0163354	0.0186214	0.0199	0.0196028	0.0165876
Arabian_Sea_221m	0.0614275	0.061165	0.0914844	0.0379638	0.0337836	0.0400479	0.0532773	0.0297452	0.0531424	0.0349835	0.0582658	0.118101	0.0246326	0.0323068	0.0296717	0.0226815	0.0557397	0.0322375	0.0968922		0.0348296	0.0369522	0.00620928	0.0100058	0.00889602	0.0111851	0.00927767	0.0104392	0.00838388
Planctomyces_maris	0.322621	0.310071	0.280535	0.326145	0.280961	0.334884	0.318234	0.308914	0.302012	0.300893	0.349972	0.318647	0.308498	0.308498	0.307934	0.291923	0.304767	0.312251	0.312682	0.304202		0.0292317	0.0397492	0.0400413	0.0347924	0.0400413	0.038849	0.0401644	0.0339765
Isosphaera_pallida	0.331699	0.320224	0.288836	0.32486	0.319646	0.320644	0.32494	0.315988	0.316387	0.316387	0.357073	0.293198	0.302907	0.307031	0.314996	0.312766	0.323474	0.319215	0.303189	0.319631	0.240051		0.0430433	0.0430535	0.0359347	0.042355	0.0415267	0.0402839	0.0360461
South_china_sea	0.0439956	0.0608938	0.0962049	0.0282274	0.0268079	0.0442407	0.0610897	0.0344606	0.0575907	0.0378073	0.0313191	0.122927	0.0248491	0.0345302	0.0312213	0.0160774	0.0609884	0.0344606	0.0997023	0.0122816	0.309106	0.329035		0.00779832	0.0106721	0.00904751	0.00789882	0.0115309	0.00998721
China_coastal_wetland	0.0395618	0.0474849	0.0854492	0.015496	0.0303938	0.0312213	0.0612103	0.0312784	0.0442407	0.0281139	0.0281392	0.111585	0.0217091	0.0313532	0.0185168	0.0128541	0.0610897	0.021671	0.0962049	0.0312784	0.313858	0.333961	0.0185865		0.00705118	0.00437728	0.00725168	0.0111795	0.00953195
Yellow_Sea	0.0504974	0.0373725	0.0859855	0.021806	0.0374571	0.0272424	0.0481044	0.0247506	0.0296946	0.019736	0.0477297	0.112391	0.0196875	0.0222147	0.0121654	0.0194324	0.0478869	0.0146405	0.0971534	0.0323068	0.299945	0.307031	0.0345302	0.0154005		0.00534063	0.0087024	0.00929179	0.00739833
Scalindua_Marina_Yangtze	0.0449918	0.0474849	0.0890732	0.015496	0.0374571	0.0377251	0.0681637	0.0378073	0.0442407	0.0346176	0.034639	0.115434	0.0281139	0.0379075	0.0248491	0.0194324	0.0645382	0.0280514	0.099907	0.0378073	0.313858	0.323	0.0249669	0.00612377	0.00918566		0.0087024	0.012215	0.0106989
Black_Sea_53m	0.0209034	0.0497284	0.088964	0.0326858	0.0200159	0.0293041	0.0569937	0.0128139	0.0463527	0.0161304	0.00318371	0.124426	0.00637763	0.00637763	0.0128139	0.00317663	0.0568511	0.0160774	0.107985	0.0260229	0.291923	0.312766	0.0193664	0.0161304	0.0227606	0.0227606		0.00629594	0.0055939
Golfo_Dulce	0.042771	0.0646967	0.101594	0.0515346	0.0338982	0.0413597	0.0559764	0.0271946	0.0618041	0.027251	0.0161276	0.131565	0.0216625	0.0188959	0.0244004	0.0161292	0.0588561	0.0271946	0.12119	0.0386556	0.345688	0.339066	0.0411448	0.0379268	0.0329147	0.0445804	0.0128551		0.00809316
Antarctica	0.0449987	0.0558378	0.0830371	0.0412755	0.0233629	0.0297452	0.0453477	0.0121753	0.0478869	0.0171723	0.0398316	0.115239	0.0121654	0.0146405	0.0146135	0.00636238	0.0478025	0.0170959	0.099931	0.0271214	0.295224	0.310815	0.0312213	0.0280514	0.0221546	0.0345302	0.0095757	0.0244004

## Sheet: Bus cluster with Refs Caption
Table. Estimates of Evolutionary Divergence over Sequence Pairs between Groups
The number of base substitutions per site from averaging over all sequence pairs between groups are shown. Standard error estimate(s) are shown above the diagonal. Analyses were conducted using the Kimura 2-parameter model [1]. The rate variation among sites was modeled with a gamma distribution (shape parameter = 5). This analysis involved 39 nucleotide sequences. Codon positions included were 1…
1. Kimura M. (1980). A simple method for estimating evolutionary rate of base substitutions through comparative studies of nucleotide sequences. Journal of Molecular Evolution 16:111-120.
2. Kumar S., Stecher G., Li M., Knyaz C., and Tamura K. (2018). MEGA X: Molecular Evolutionary Genetics Analysis across computing platforms. Molecular Biology and Evolution 35:1547-1549.
Disclaimer: Although utmost care has been taken to ensure the correctness of the caption, the caption text is provided "as is" without any warranty of any kind. Authors advise the user to carefully check the caption prior to its use for any purpose and report any errors or problems to the authors immediately (www.megasoftware.net). In no event shall the authors and their employers be liable for a…

## Sheet: Caption1
Table. Estimates of Average Evolutionary Divergence over Sequence Pairs within Groups
The number of base substitutions per site from averaging over all sequence pairs within each group are shown. Standard error estimate(s) are shown above the diagonal. Analyses were conducted using the Kimura 2-parameter model [1]. The rate variation among sites was modeled with a gamma distribution (shape parameter = 5). This analysis involved 39 nucleotide sequences. Codon positions included wer…
1. Kimura M. (1980). A simple method for estimating evolutionary rate of base substitutions through comparative studies of nucleotide sequences. Journal of Molecular Evolution 16:111-120.
2. Kumar S., Stecher G., Li M., Knyaz C., and Tamura K. (2018). MEGA X: Molecular Evolutionary Genetics Analysis across computing platforms. Molecular Biology and Evolution 35:1547-1549.
Disclaimer: Although utmost care has been taken to ensure the correctness of the caption, the caption text is provided "as is" without any warranty of any kind. Authors advise the user to carefully check the caption prior to its use for any purpose and report any errors or problems to the authors immediately (www.megasoftware.net). In no event shall the authors and their employers be liable for a…

## Sheet: Caption2
Table. Estimates of Average Evolutionary Divergence over Sequence Pairs within Groups
The number of base substitutions per site from averaging over all sequence pairs within each group are shown. Standard error estimate(s) are shown above the diagonal. Analyses were conducted using the Kimura 2-parameter model [1]. The rate variation among sites was modeled with a gamma distribution (shape parameter = 5). This analysis involved 39 nucleotide sequences. Codon positions included wer…	0.0563063	0.00643896
1. Kimura M. (1980). A simple method for estimating evolutionary rate of base substitutions through comparative studies of nucleotide sequences. Journal of Molecular Evolution 16:111-120.
2. Kumar S., Stecher G., Li M., Knyaz C., and Tamura K. (2018). MEGA X: Molecular Evolutionary Genetics Analysis across computing platforms. Molecular Biology and Evolution 35:1547-1549.
Disclaimer: Although utmost care has been taken to ensure the correctness of the caption, the caption text is provided "as is" without any warranty of any kind. Authors advise the user to carefully check the caption prior to its use for any purpose and report any errors or problems to the authors immediately (www.megasoftware.net). In no event shall the authors and their employers be liable for a…

## Sheet: Caption3
Table. Estimates of Average Evolutionary Divergence over Sequence Pairs within Groups
The number of base substitutions per site from averaging over all sequence pairs within each group are shown. Standard error estimate(s) are shown above the diagonal. Analyses were conducted using the Kimura 2-parameter model [1]. The rate variation among sites was modeled with a gamma distribution (shape parameter = 5). This analysis involved 39 nucleotide sequences. Codon positions included wer…	0.0563063	0.00643896
1. Kimura M. (1980). A simple method for estimating evolutionary rate of base substitutions through comparative studies of nucleotide sequences. Journal of Molecular Evolution 16:111-120.
2. Kumar S., Stecher G., Li M., Knyaz C., and Tamura K. (2018). MEGA X: Molecular Evolutionary Genetics Analysis across computing platforms. Molecular Biology and Evolution 35:1547-1549.
Disclaimer: Although utmost care has been taken to ensure the correctness of the caption, the caption text is provided "as is" without any warranty of any kind. Authors advise the user to carefully check the caption prior to its use for any purpose and report any errors or problems to the authors immediately (www.megasoftware.net). In no event shall the authors and their employers be liable for a…
